# Supplementary material for: Synthesis, Cu(ii) complexation,64Cu-labeling and biological evaluation of cross-bridged cyclam chelators with phosphonate pendant arms
Source: Royal Society of Chemistry journal article supplement (doi:10.1039/c1dt11743b), 2011-12-15

## Electronic Supplementary Information (ESI)

### Synthesis, Cu(II) complexation, <sup>64</sup>Cu-labeling and biological evaluation of cross-bridged cyclam chelators with phosphonate pendant arms

**Riccardo Ferdani,<sup>a</sup> Dannon J. Stigers,<sup>b</sup> Ashley L. Fiamengo,<sup>a</sup> Lihui Wei,<sup>a</sup> Barbara T. Y. Li,<sup>b</sup> James A. Golen,<sup>c</sup> Arnold L. Rheingold,<sup>d</sup> Gary R. Weisman,<sup>\*,b,e</sup> Edward H. Wong<sup>\*,b,f</sup> and Carolyn J. Anderson<sup>\*,a,g,h</sup>**

<sup>a</sup> *Mallinckrodt Institute of Radiology, Washington University School of Medicine, St. Louis, Missouri, 63110, USA*

<sup>b</sup> *Department of Chemistry, University of New Hampshire, Durham, New Hampshire, 03824, USA*

<sup>c</sup> *Department of Chemistry and Biochemistry, University of Massachusetts, Dartmouth, North Dartmouth, Massachusetts, 02747, USA*

<sup>d</sup> *Department of Chemistry and Biochemistry, University of California, San Diego, La Jolla, California, 92093, USA*

<sup>e</sup> *E-mail: gary.weisman@unh.edu*

<sup>f</sup> *E-mail: ehw@unh.edu*

<sup>g</sup> *Department of Biochemistry; Department of Chemistry, Washington University, St. Louis, Missouri, 63110, USA*

<sup>h</sup> *Current address: Department of Radiology, University of Pittsburgh, Pittsburgh, PA 15219, USA; E-mail: andersoncj@upmc.edu*

| Table of Contents                                                                            | Page |
|----------------------------------------------------------------------------------------------|------|
| 1. Details of HPLC Purification of CB-TE1A1P ( <b>2</b> )                                    | 3    |
| 2. List of X-ray Crystallographic Software Employed                                          | 4    |
| 3. Detailed Energetic Results for DFT Calculations                                           | 5    |
| 4. UV/VIS Spectrum of Cu-CB-TE1A1P                                                           | 7    |
| 5. NMR Spectra                                                                               | 7    |
| NMR Spectra of TFA Salt ( <b>2</b> •2.5TFA•H <sub>2</sub> O) of CB-TE1A1P (D <sub>2</sub> O) | 8    |
| <sup>1</sup> H NMR (500 MHz) & expansions                                                    | 8    |
| COSY & expansions                                                                            | 32   |
| <sup>13</sup> C{ <sup>1</sup> H} NMR (125.7 MHz) & expansions                                | 38   |
| <sup>13</sup> C{ <sup>1</sup> H} NMR (100.5 MHz) & expansions                                | 44   |
| Comparison of 125.7 & 100.5 MHz <sup>13</sup> C{ <sup>1</sup> H} spectra                     | 45   |
| HMQC & expansions                                                                            | 51   |
| <sup>31</sup> P{ <sup>1</sup> H} NMR                                                         | 56   |
| NMR Spectra of <b>6</b> (C <sub>6</sub> D <sub>6</sub> )                                     | 57   |
| <sup>1</sup> H NMR (500 MHz) & expansions                                                    | 57   |
| COSY & expansions                                                                            | 72   |
| <sup>13</sup> C{ <sup>1</sup> H} NMR (125.7 MHz) & expansions                                | 79   |
| <sup>13</sup> C{ <sup>1</sup> H} NMR (100.5 MHz) & expansions                                | 88   |
| Comparison of 125.7 & 100.5 MHz <sup>13</sup> C{ <sup>1</sup> H} spectra                     | 89   |
| HMQC & expansions                                                                            | 98   |
| <sup>31</sup> P{ <sup>1</sup> H} NMR                                                         | 107  |

### 1. Details of HPLC Purification of CB-TE1A1P (2)

A batch of CB-TE1A1P that contained some impurities was purified by HPLC using a C<sub>18</sub> semipreparative column with a 3 mL/min flow rate and the following gradient:

| Time (min) | % 0.1% TFA in water | % 0.1% TFA in acetonitrile |
|------------|---------------------|----------------------------|
| 0          | 100                 | 0                          |
| 10         | 100                 | 0                          |
| 20         | 90                  | 10                         |
| 21         | 50                  | 50                         |
| 23         | 50                  | 50                         |
| 24         | 80                  | 20                         |
| 25         | 100                 | 0                          |
| 30         | 100                 | 0                          |

The compound eluted with a broad peak starting at 8.0 minutes. The collection was stopped after minute 15.0. A UV chromatogram at 210 nm is shown in the figure below.

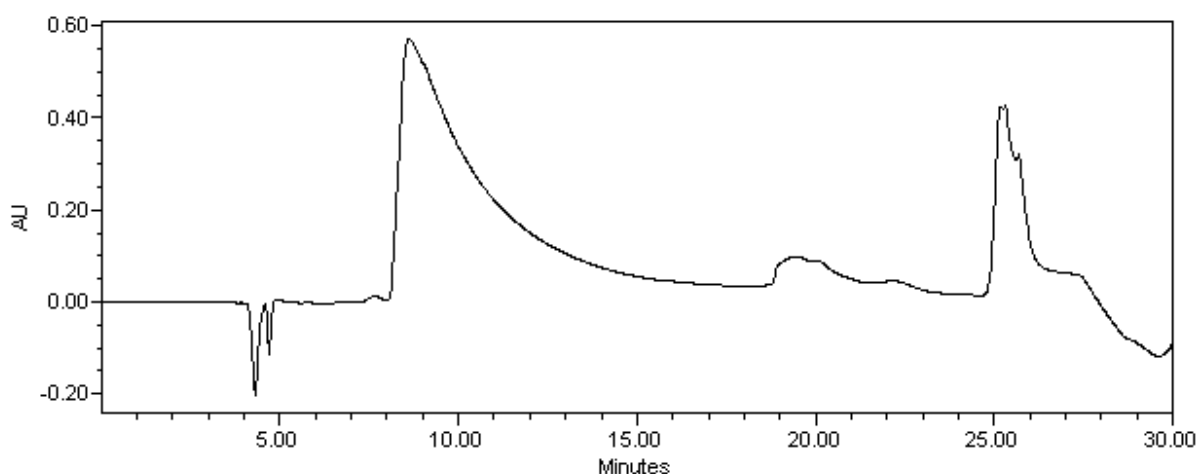

LC-MS was used to make sure that no impurity eluted in the 8.0-15.0 minute range. The only peaks visible in the MS chromatogram of the collected fractions are  $M^*H^+$  ( $m/z=379.3$ ) and  $2M^*H^+$  ( $m/z=757.4$ ).

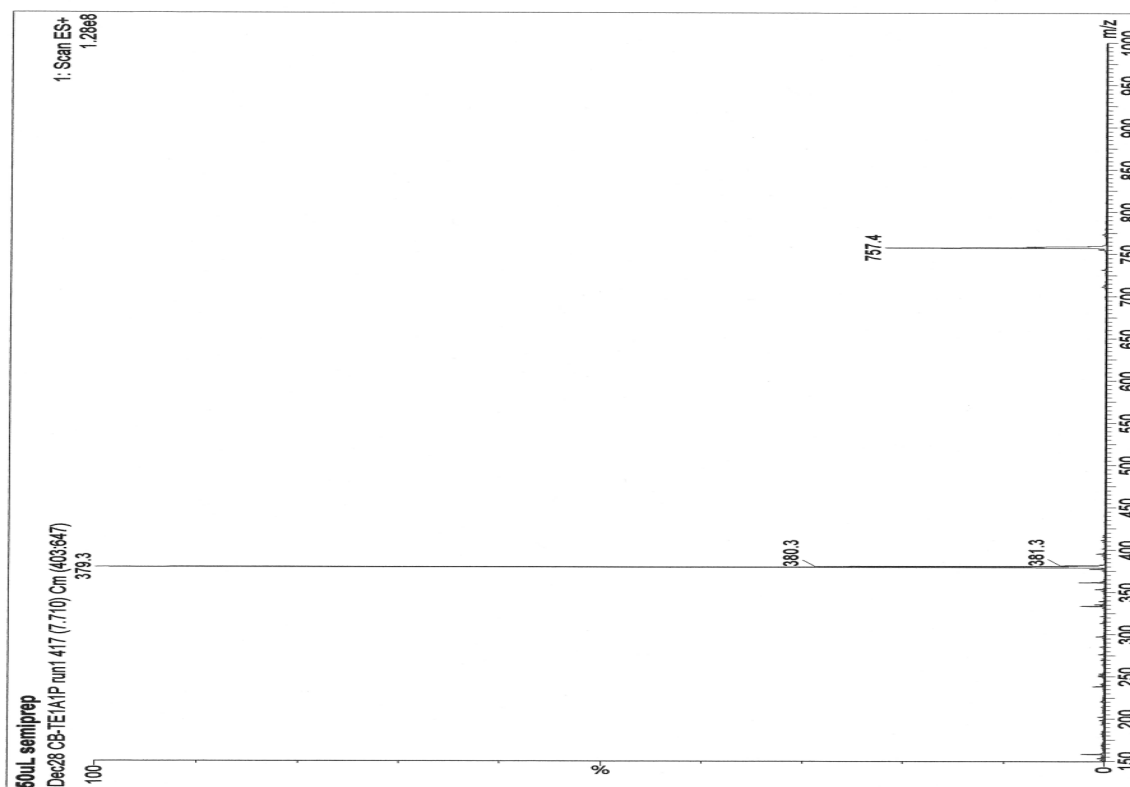

## 2. List of X-ray Crystallographic Software Employed

APEX2 Version 2.2 /SHELXTL (Bruker AXS Inc., 2007)

SAINT Version 7.34a (Bruker AXS Inc., 2007)

SADABS Version 2007/2 (Sheldrick, Bruker AXS Inc.)

XPREF Version 2005/2 (Sheldrick, Bruker AXS Inc.)

Bruker suite of programs APEX2/SHELXTL, SAINT, SADABS, XPREF may be obtained from Bruker AXS.Inx, 5467 East Cheryl Parkway, Madison WI 53711

XS Version 2008/1 (George M. Sheldrick, Acta Cryst. (2008) **A64**, 112-122.)

XL Version 2008/1 (George M. Sheldrick, Acta Cryst. (2008) **A64**, 112-122.)

X-ray crystal structure figures were prepared using CrystalMaker 8.5 for Mac (CrystalMaker Software Ltd., Centre for Innovation & Enterprise, Oxford University Begbroke Science Park, Sandy Lane, Yarnton, Oxfordshire, OX5 1PF, UK; <http://www.crystallmaker.com>)

3. Detailed Energetic Results for DFT Calculations

**Cu-  
CBTE2P**

| Method       | Conformer       | E (kcal/mol) | ZPE<br>(kcal/mol) | ZPE-corr E<br>(kcal/mol) | H° (kcal/mol) | S°<br>(cal/mol<br>K) | G° (kcal/mol) |
|--------------|-----------------|--------------|-------------------|--------------------------|---------------|----------------------|---------------|
| B3LYP/6-31G* | [2233]/[2233]   | -2224578.459 | 303.547           | -2224274.912             | -2224259.710  | 151.315              | -2224304.824  |
| B3LYP/6-31G* | [2323]/[2323]   | -2224577.968 | 303.065           | -2224274.903             | -2224259.624  | 152.192              | -2224305.000  |
|              | Delta (1st-2nd) | -0.491       |                   | -0.009                   | -0.086        |                      | 0.176         |
| M06/6-31G*   | [2233]/[2233]   | -2224057.804 | 302.986           | -2223754.818             | -2223739.849  | 149.505              | -2223784.424  |
| M06/6-31G*   | [2323]/[2323]   | -2224056.887 | 302.769           | -2223754.118             | -2223739.125  | 149.999              | -2223783.847  |
|              | Delta (1st-2nd) | -0.917       |                   | -0.700                   | -0.724        |                      | -0.577        |
| M06/6-31+G** | [2233]/[2233]   | -2224119.778 |                   |                          |               |                      |               |
| M06/6-31+G** | [2323]/[2323]   | -2224118.92  |                   |                          |               |                      |               |
|              |                 | -0.858       |                   |                          |               |                      |               |

**Cu-  
CBTE1A1P**

| Method       | Conformer       | E (kcal/mol) | ZPE<br>(kcal/mol) | ZPE-corr E<br>(kcal/mol) | H° (kcal/mol) | S°<br>(cal/mol<br>K) | G° (kcal/mol) |
|--------------|-----------------|--------------|-------------------|--------------------------|---------------|----------------------|---------------|
| B3LYP/6-31G* | [2233]/[2233]   | -1986668.793 | 296.081           | -1986372.713             | -1986358.562  | 144.926              | -1986401.771  |
| B3LYP/6-31G* | [2323]/[2323]   | -1986669.104 | 296.320           | -1986372.784             | -1986358.654  | 144.825              | -1986401.833  |
|              | Delta (1st-2nd) | 0.311        |                   | 0.071                    | 0.092         |                      | 0.062         |
| M06/6-31G*   | [2233]/[2233]   | -1986163.941 | 295.292           | -1985868.649             | -1985854.737  | 142.918              | -1985897.348  |
| M06/6-31G*   | [2323]/[2323]   | -1986163.415 | 295.461           | -1985867.954             | -1985854.048  | 143.092              | -1985896.711  |
|              | Delta (1st-2nd) | -0.526       |                   | -0.695                   | -0.689        |                      | -0.637        |
| M06/6-31+G** | [2233]/[2233]   | -1986219.083 |                   |                          |               |                      |               |

|                  |                 |              |                |                            |               |                |               |
|------------------|-----------------|--------------|----------------|----------------------------|---------------|----------------|---------------|
| M06/6-31+G**     | [2323]/[2323]   | -1986218.413 |                |                            |               |                |               |
|                  |                 | -0.67        |                |                            |               |                |               |
| <b>Cu-CBTE2A</b> |                 |              |                |                            |               |                |               |
| Method           | Conformer       | E (kcal/mol) | ZPE (kcal/mol) | ZPE-corrected E (kcal/mol) | H° (kcal/mol) | S° (cal/mol K) | G° (kcal/mol) |
| B3LYP/6-31G*     | [2233]/[2233]   | -1748754.253 | 289.366        | -1748464.887               | -1748451.890  | 137.475        | -1748492.879  |
| B3LYP/6-31G*     | [2323]/[2323]   | -1748755.612 | 289.171        | -1748466.441               | -1748453.402  | 138.029        | -1748494.555  |
|                  | Delta (1st-2nd) | 1.359        |                | 1.554                      | 1.512         |                | 1.676         |
| M06/6-31G*       | [2233]/[2233]   | -1748265.280 | 287.683        | -1747977.597               | -1747964.701  | 136.644        | -1748005.442  |
| M06/6-31G*       | [2323]/[2323]   | -1748266.435 | 288.257        | -1747978.179               | -1747965.361  | 136.448        | -1748006.043  |
|                  | Delta (1st-2nd) | 1.155        |                | 0.582                      | 0.660         |                | 0.601         |
| M06/6-31+G**     | [2233]/[2233]   | -1748313.884 |                |                            |               |                |               |
| M06/6-31+G**     | [2323]/[2323]   | -1748314.563 |                |                            |               |                |               |
|                  | Delta (1st-2nd) | 0.679        |                |                            |               |                |               |

4. UV/VIS Spectrum of Cu-CB-TE1A1P

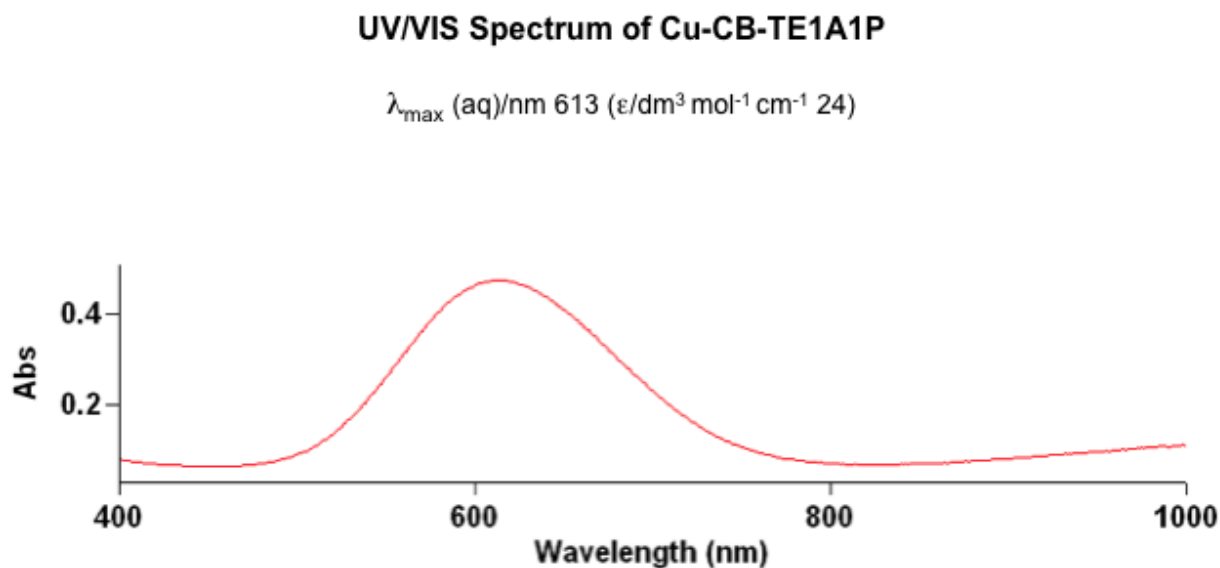

5. NMR spectra of ligand **2** and precursor **6**

(Note that NMR spectra for ligand **1** and its precursor **4** may be found in the ESI of reference 55 (D. J. Stigers, R. Ferdani, G. R. Weisman, E. H. Wong, C. J. Anderson, J. A. Golen, C. Moore and A. L. Rheingold, *Dalton Trans.*, 2010, **39**, 1699-1701; doi: 10.1039/b920871b).

|    |                        |                     |
|----|------------------------|---------------------|
| 1  | Data File Name         | RF-CB-TE1A1P_1H     |
| 2  | Origin                 | Varian              |
| 3  | Solvent                | D2O                 |
| 4  | Number of Scans        | 32                  |
| 5  | Receiver Gain          | 28                  |
| 6  | Acquisition Time       | 3.0000              |
| 7  | Acquisition Date       | 2011-01-21T10:51:45 |
| 8  | Spectrometer Frequency | 499.77707           |
| 9  | Spectral Width         | 7992.0              |
| 10 | Lowest Frequency       | -1419.1             |
| 11 | Nucleus                | 1H                  |
| 12 | Acquired Size          | 23976               |
| 13 | Spectral Size          | 65536               |

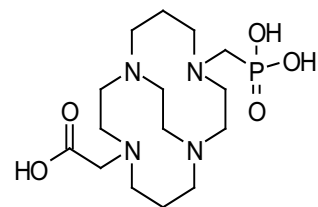

D<sub>2</sub>O, 499.78 MHz, internal reference  
with MeCN set at  $\delta$  2.06

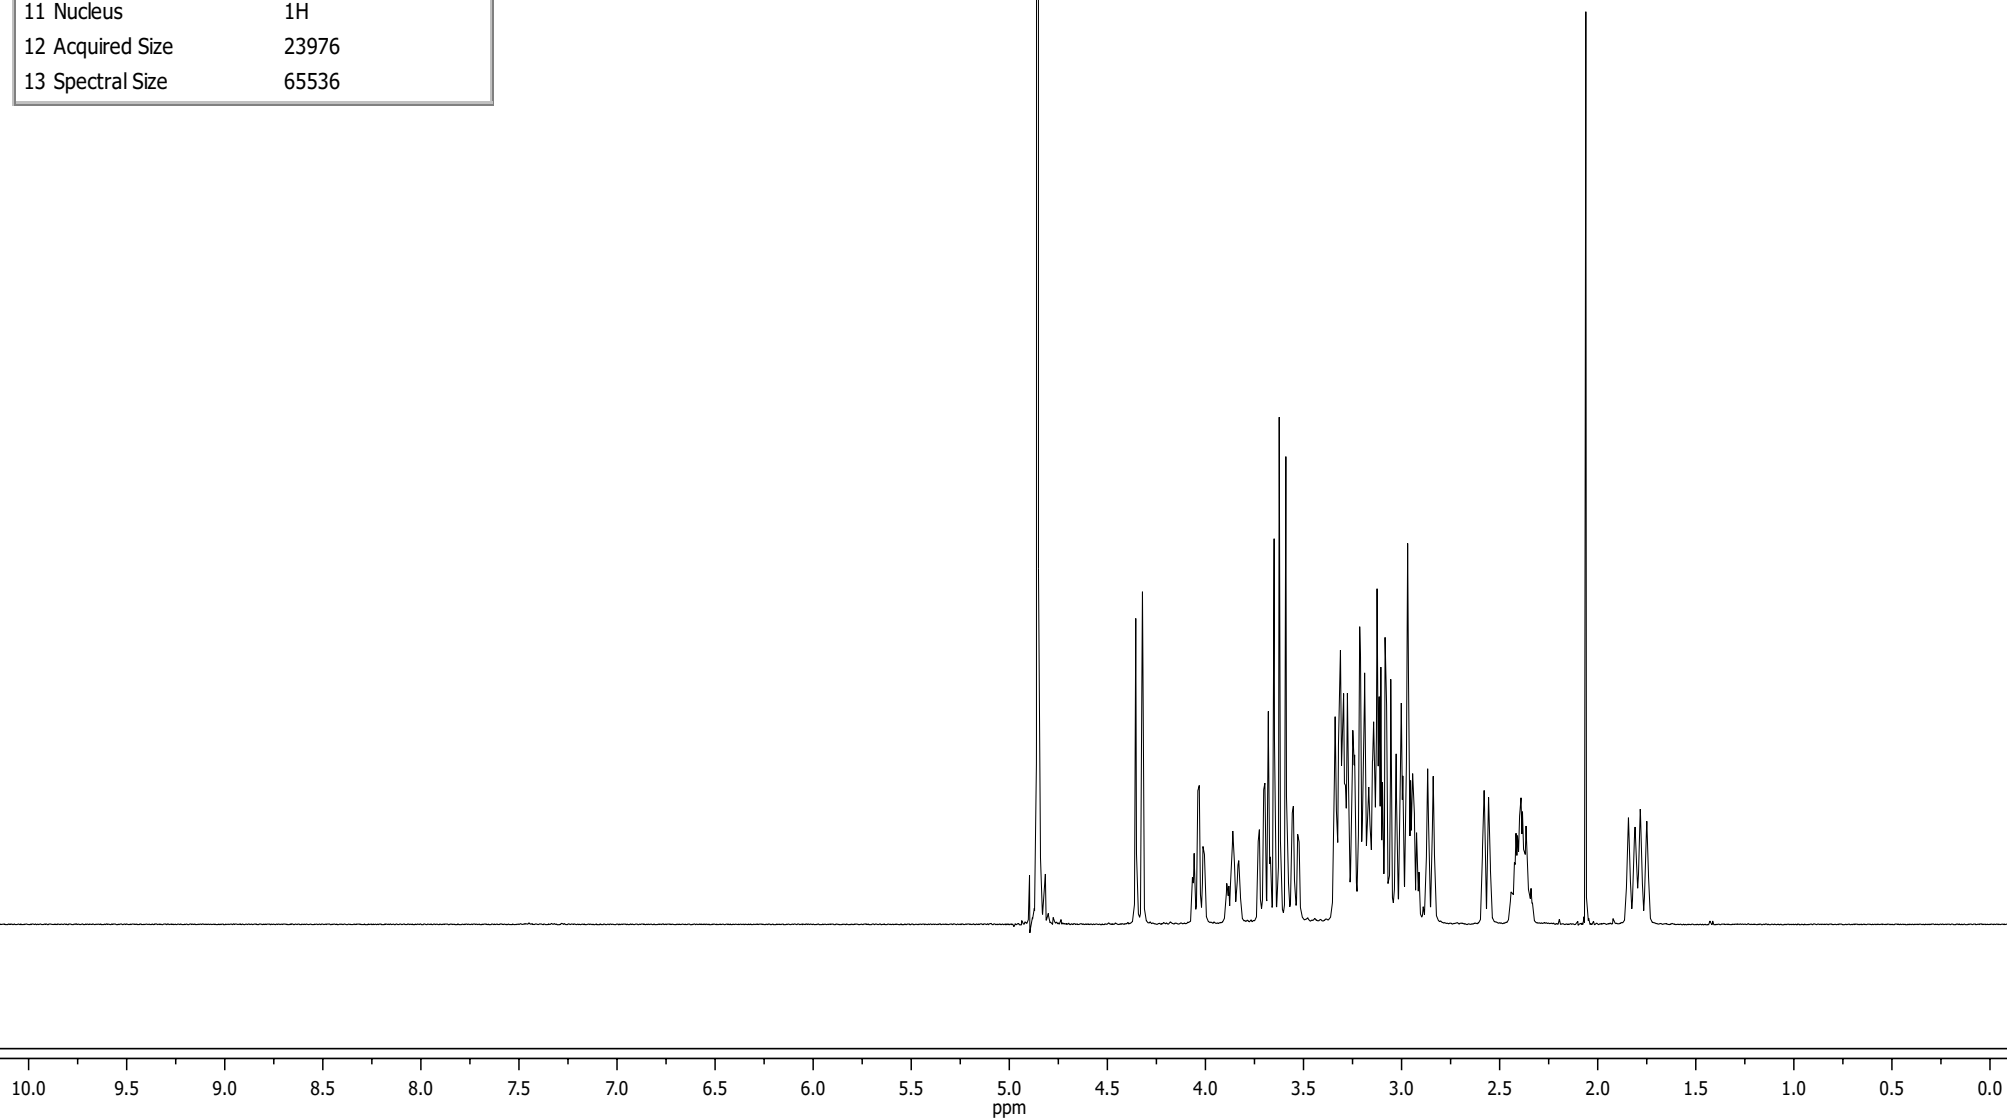

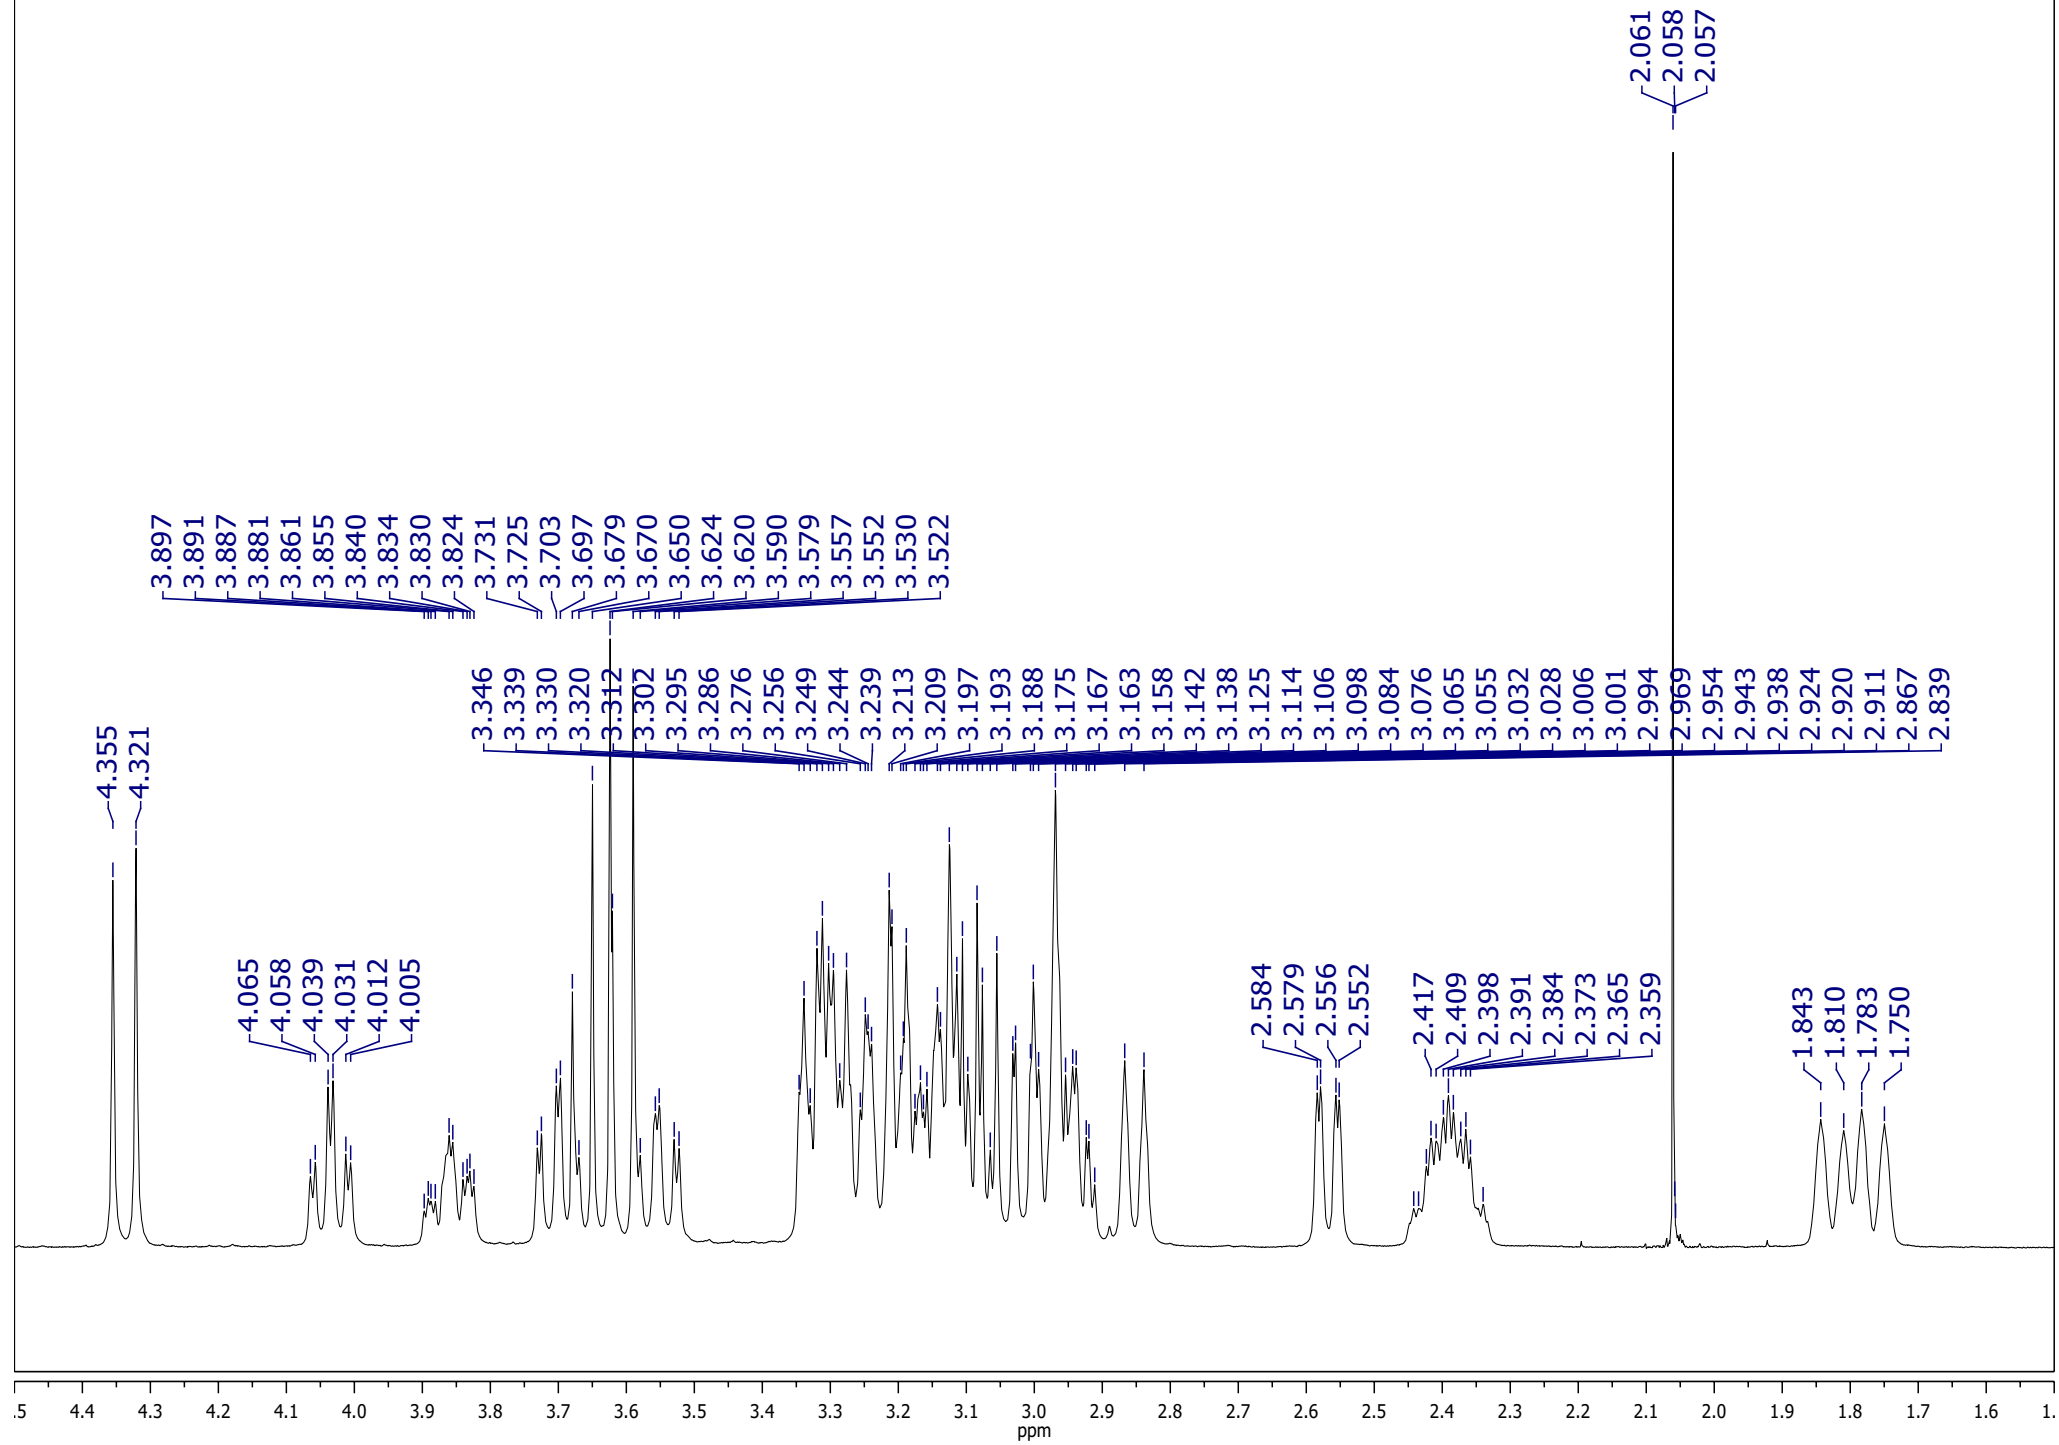

Region of interest: 1.70-1.89 ppm

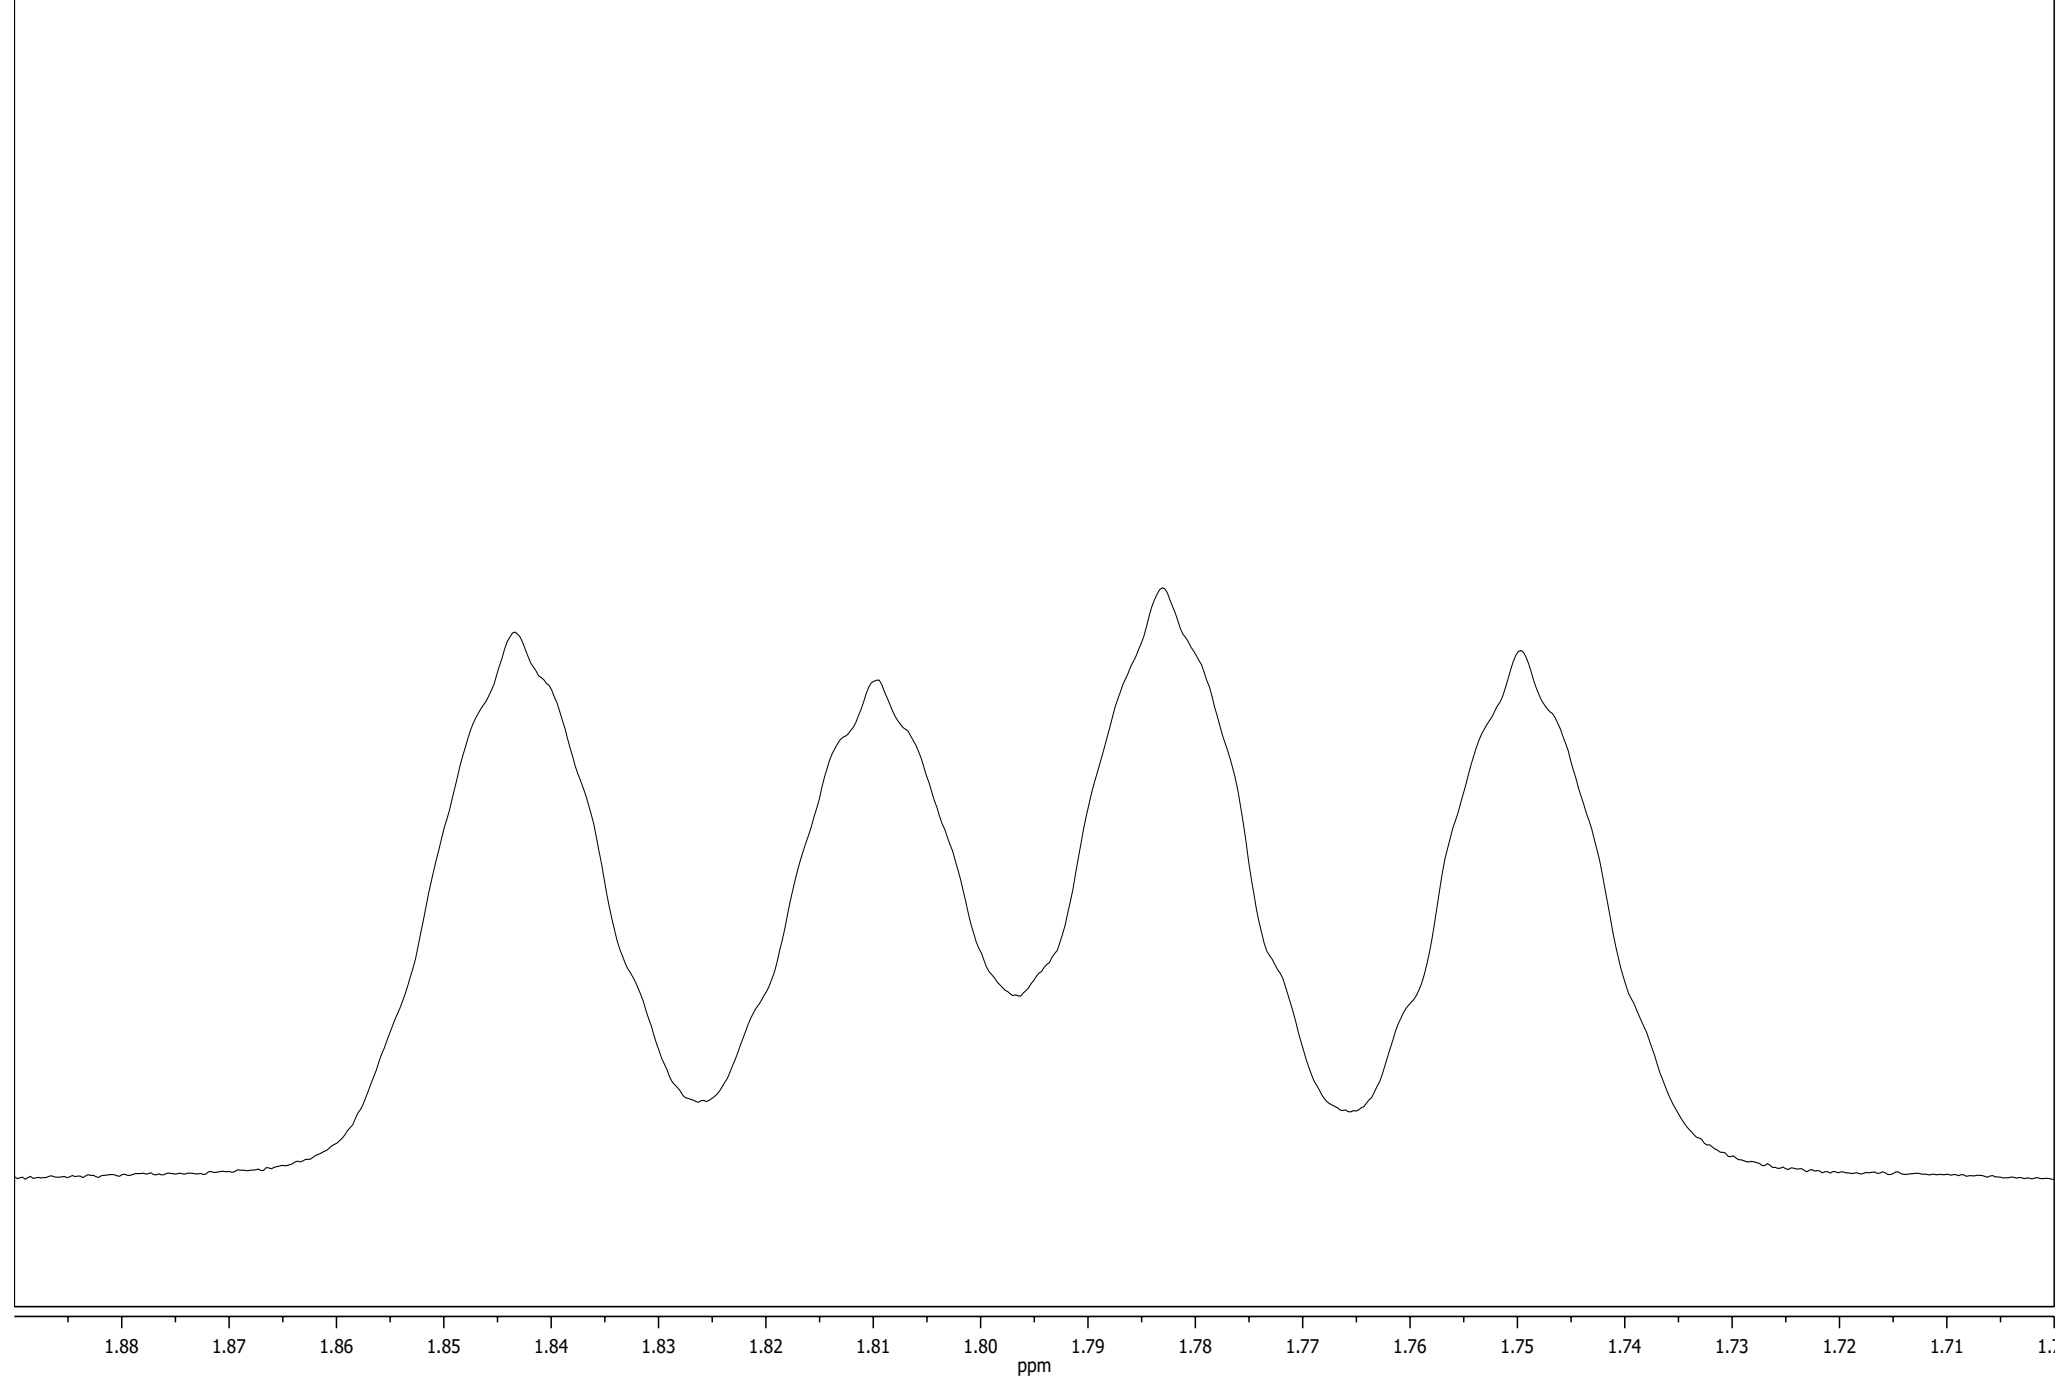

Region of interest: 1.70-1.89 ppm

Exponential: -1.32  
Gaussian: 0.70 GB

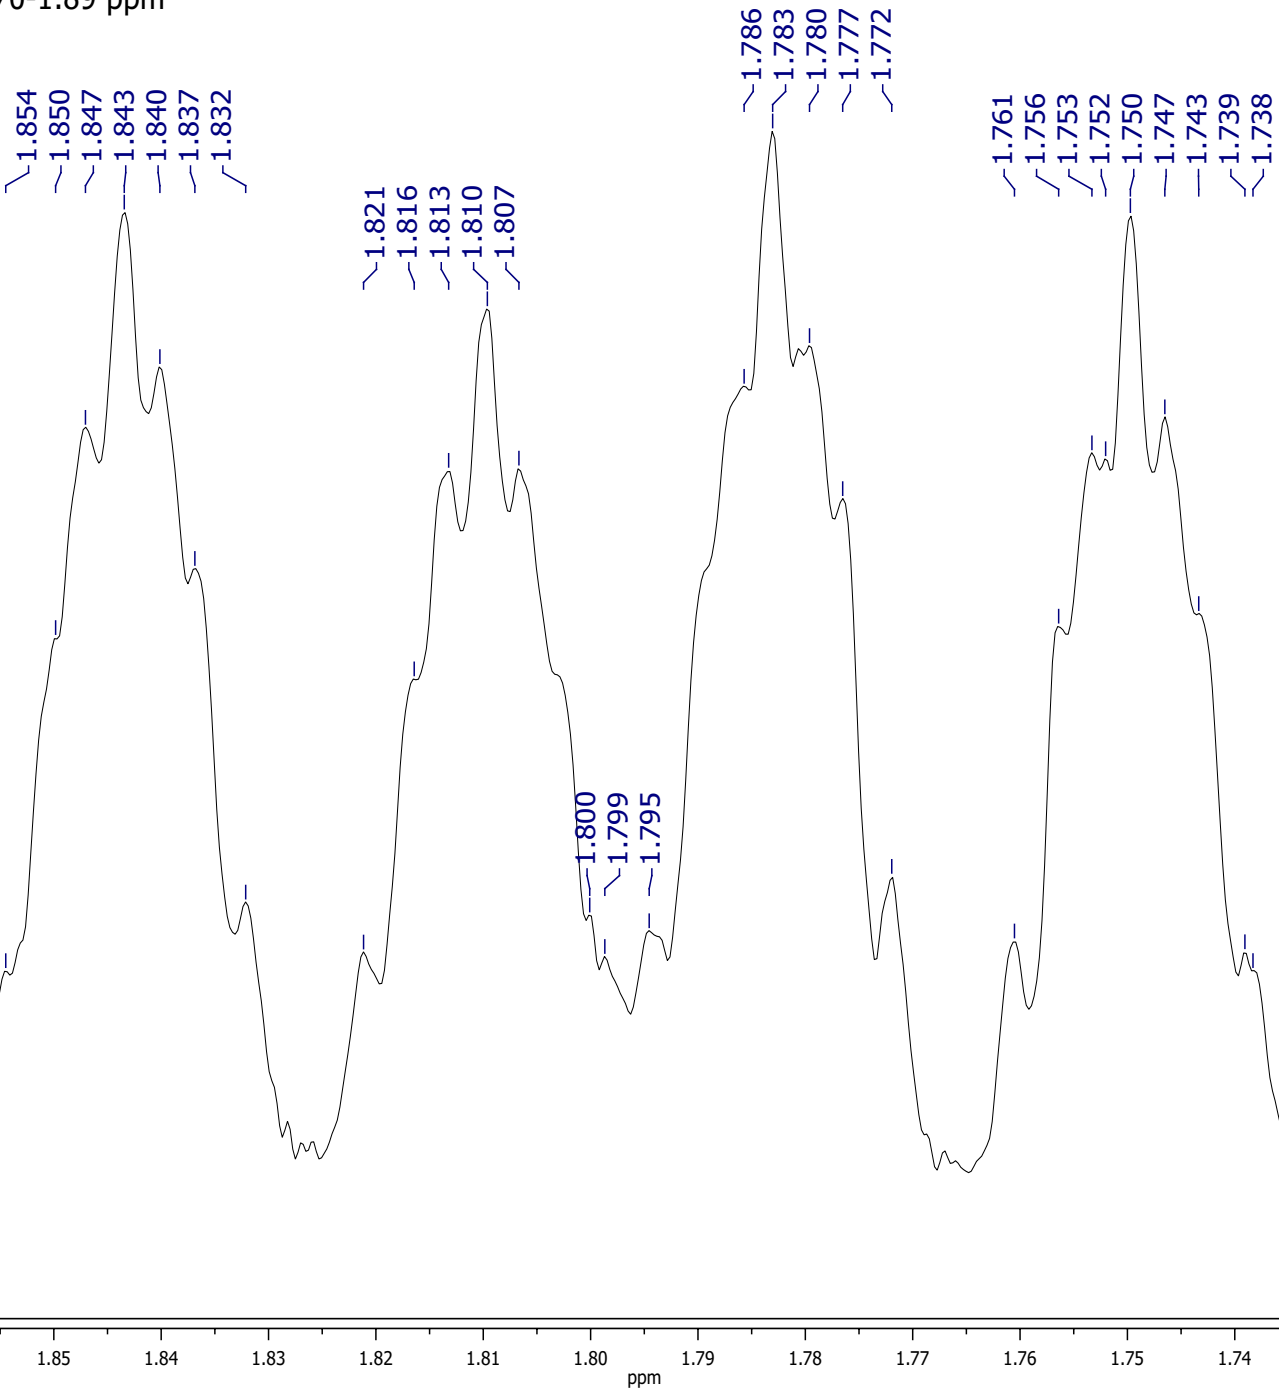

Region of interest: 1.70-1.89 ppm

Exponential: -1.32  
Gaussian: 0.70 GB

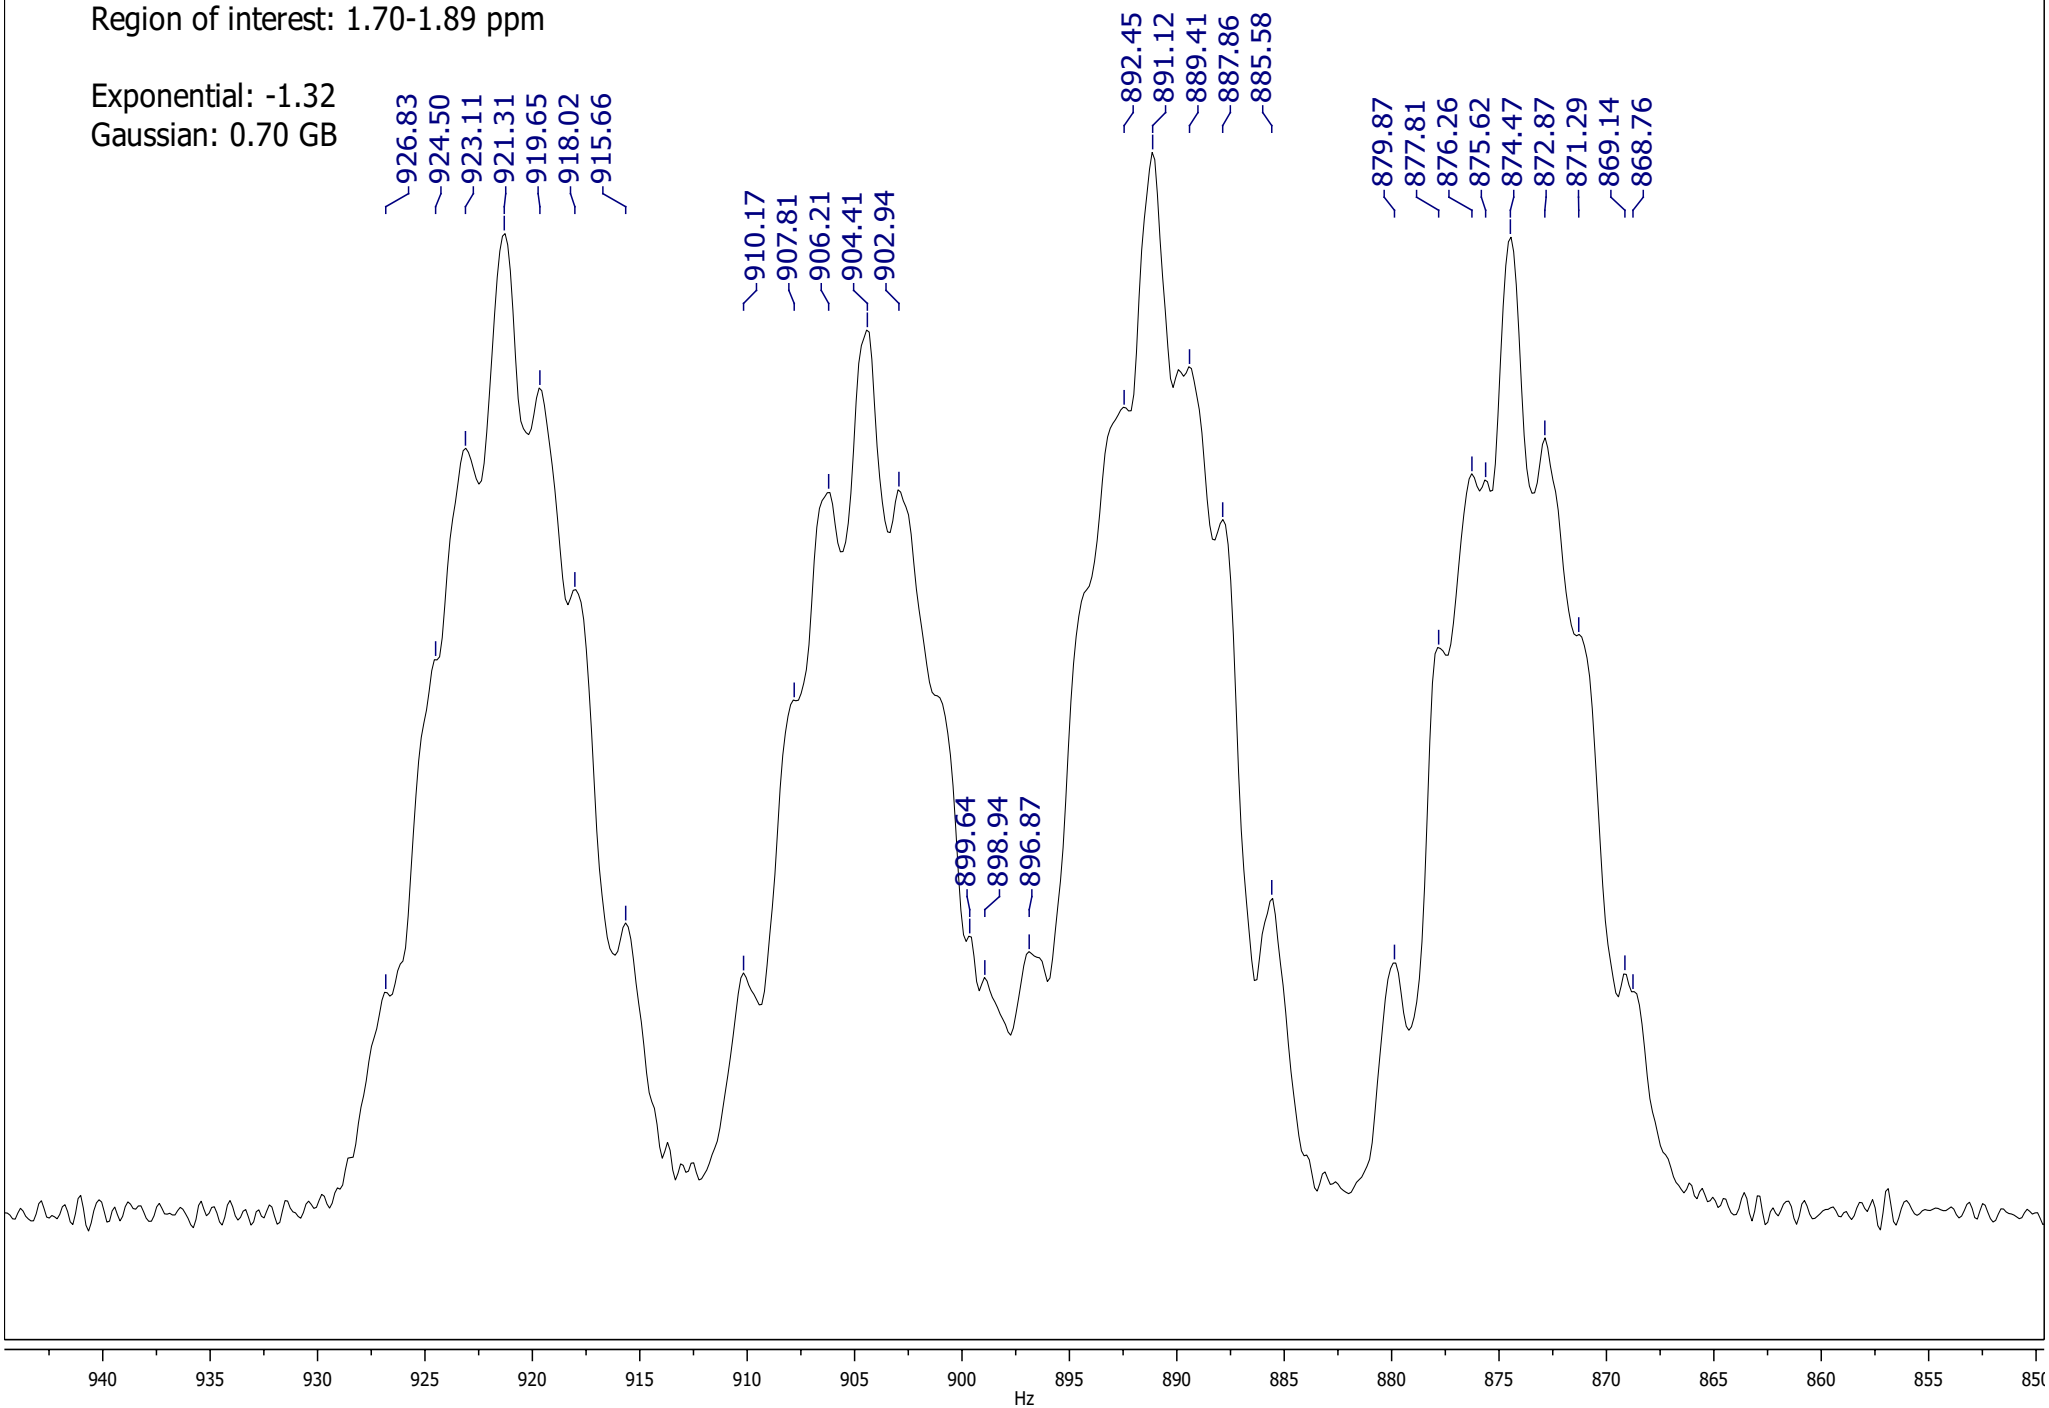

Region of interest: 2.28 - 2.50 ppm

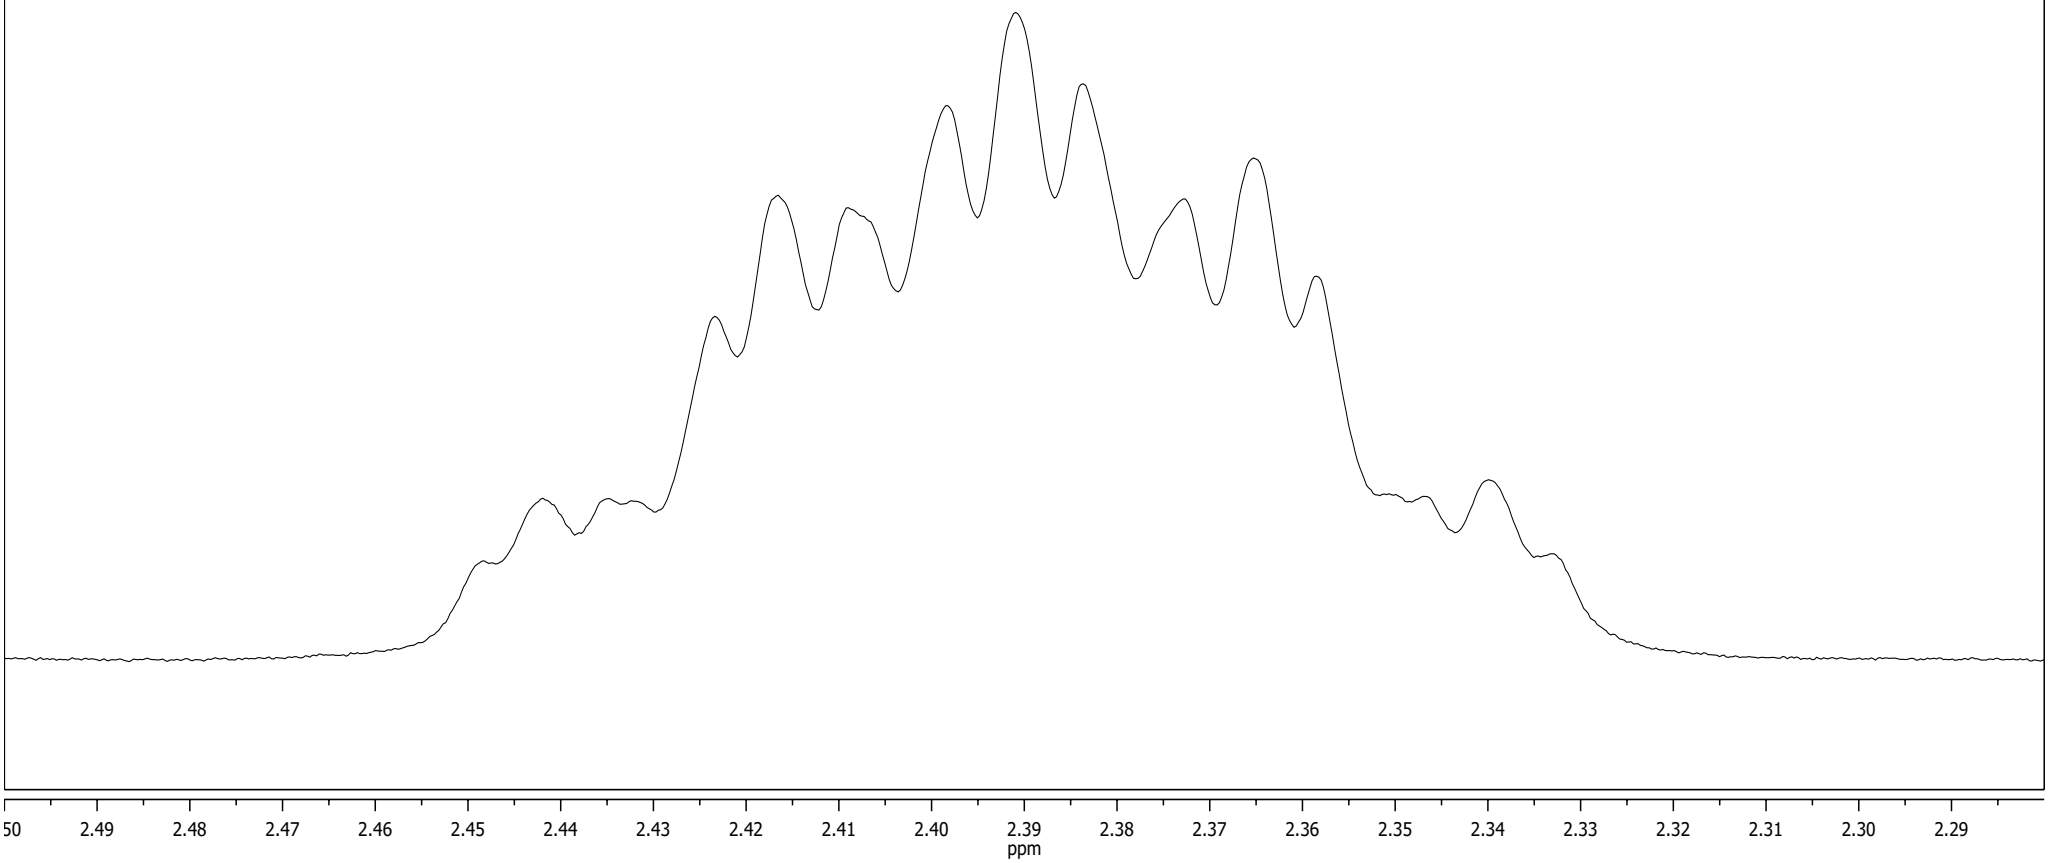

Region of interest: 2.28 - 2.50 ppm

Exponential: -1.32  
Gaussian: 0.70 GB

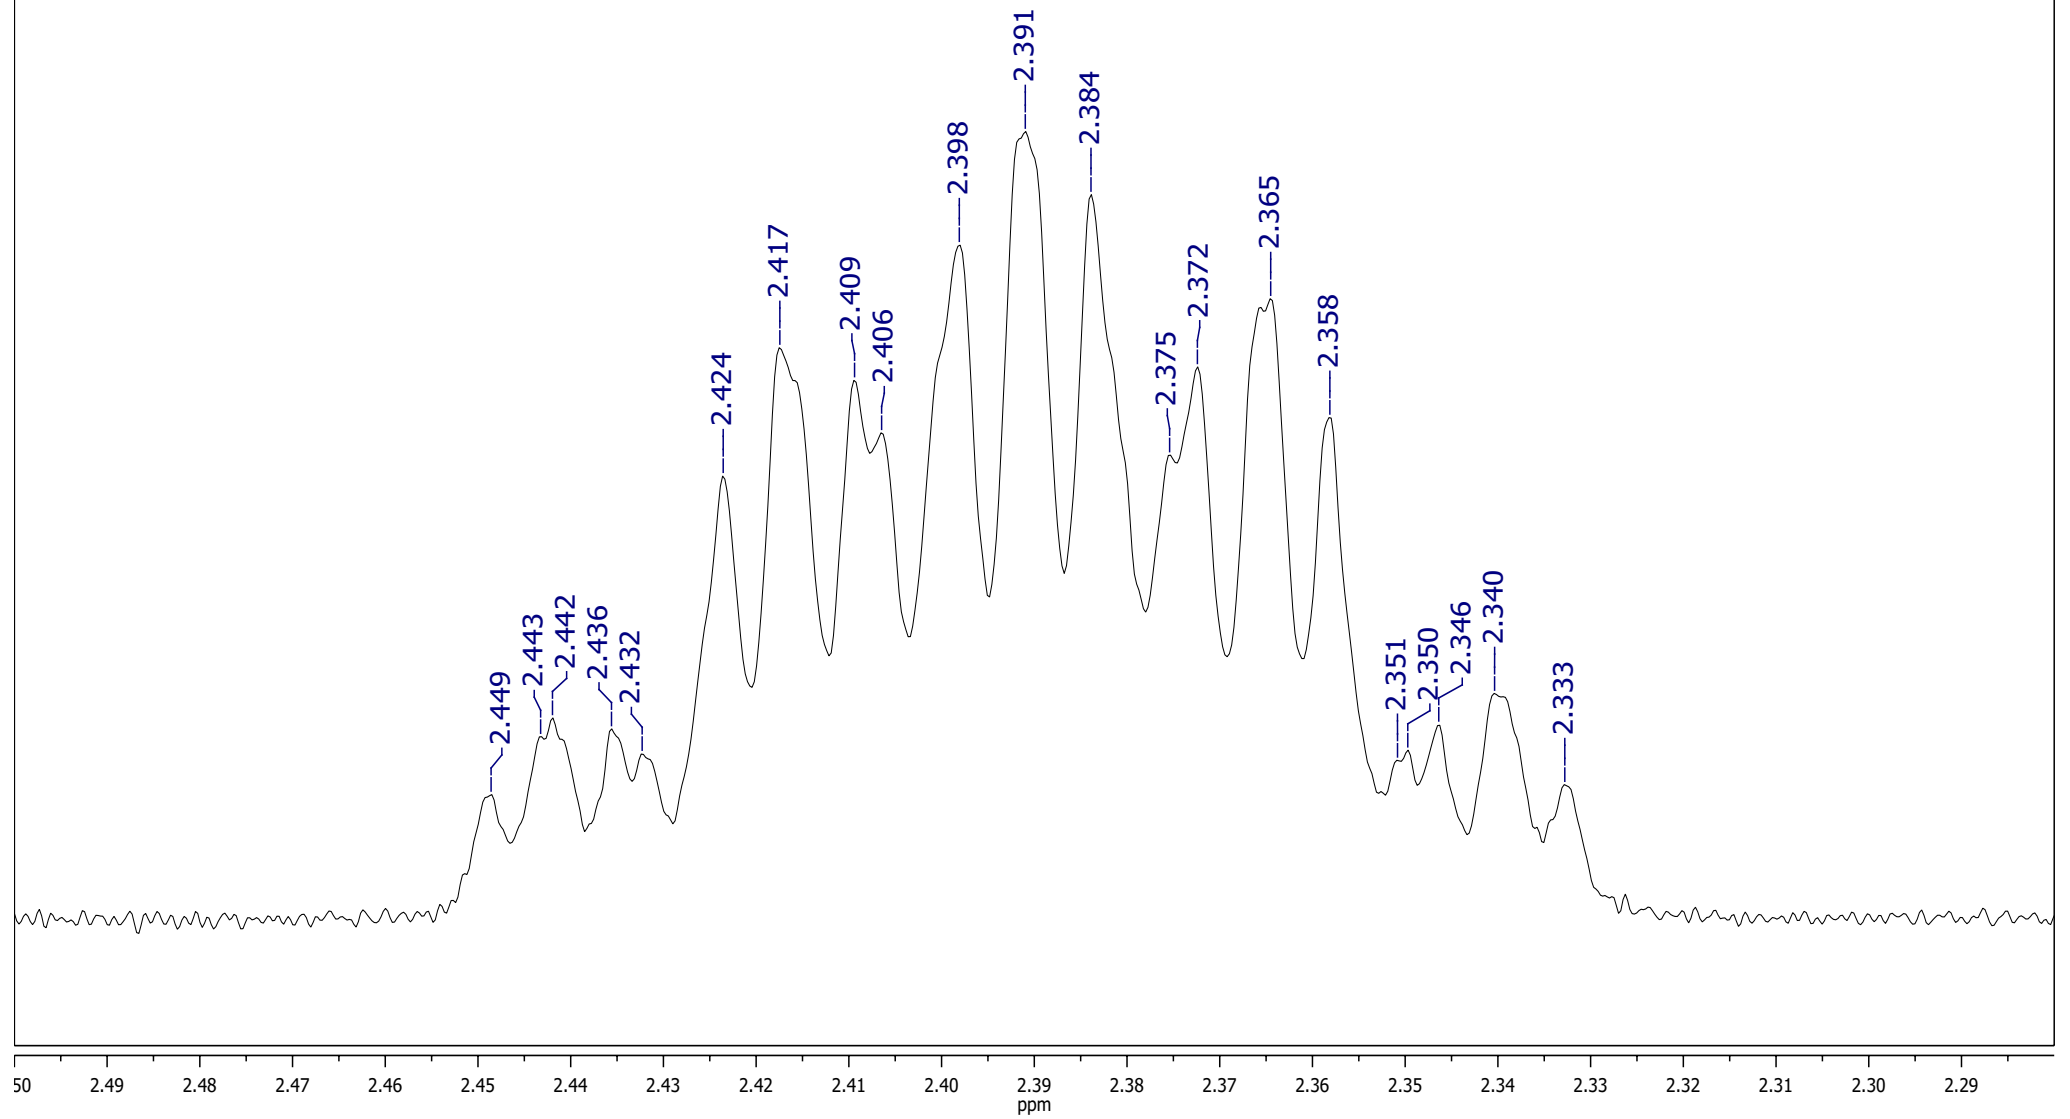

Region of interest: 2.28 - 2.50 ppm

Exponential: -1.32  
Gaussian: 0.70 GB

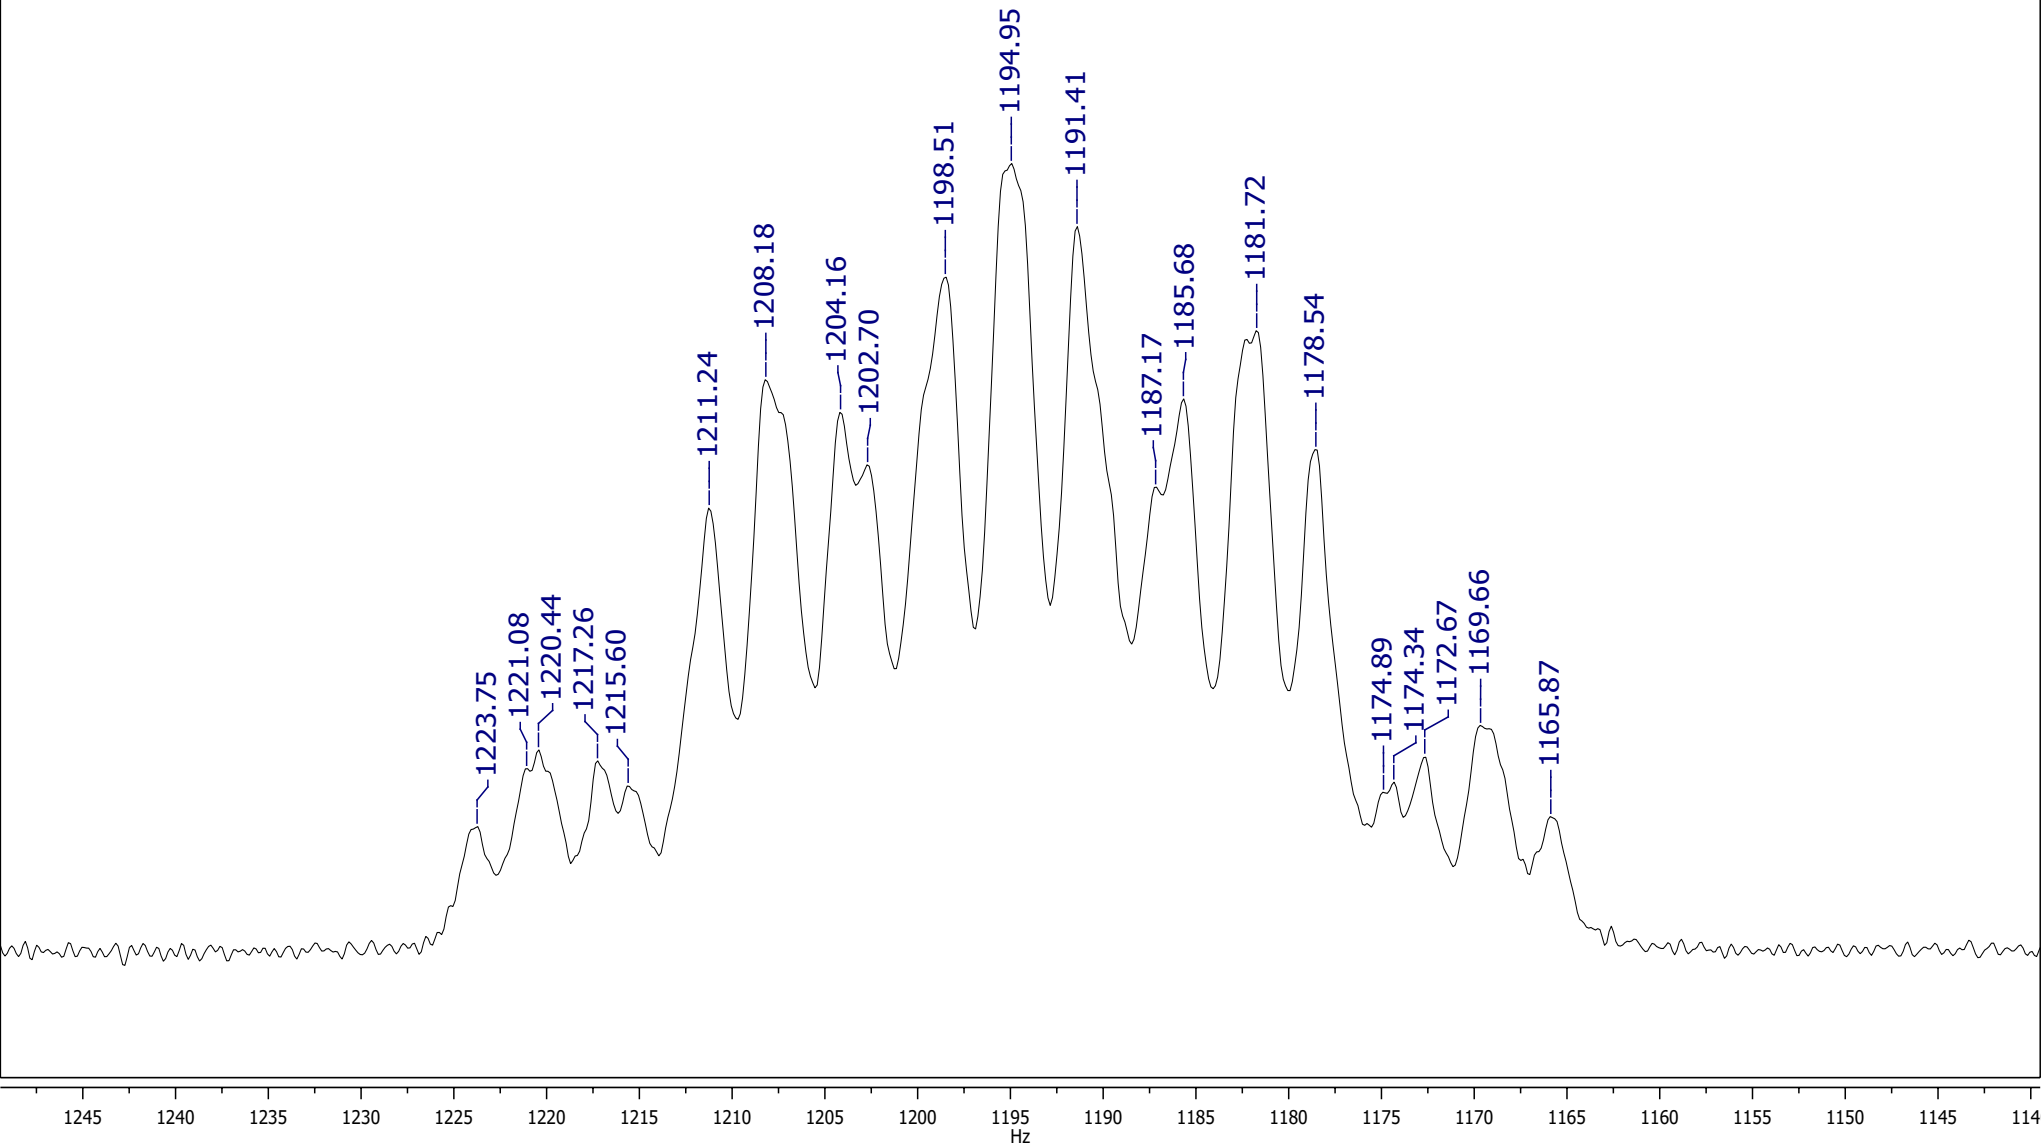

Region of interest: 2.52 - 2.61 ppm

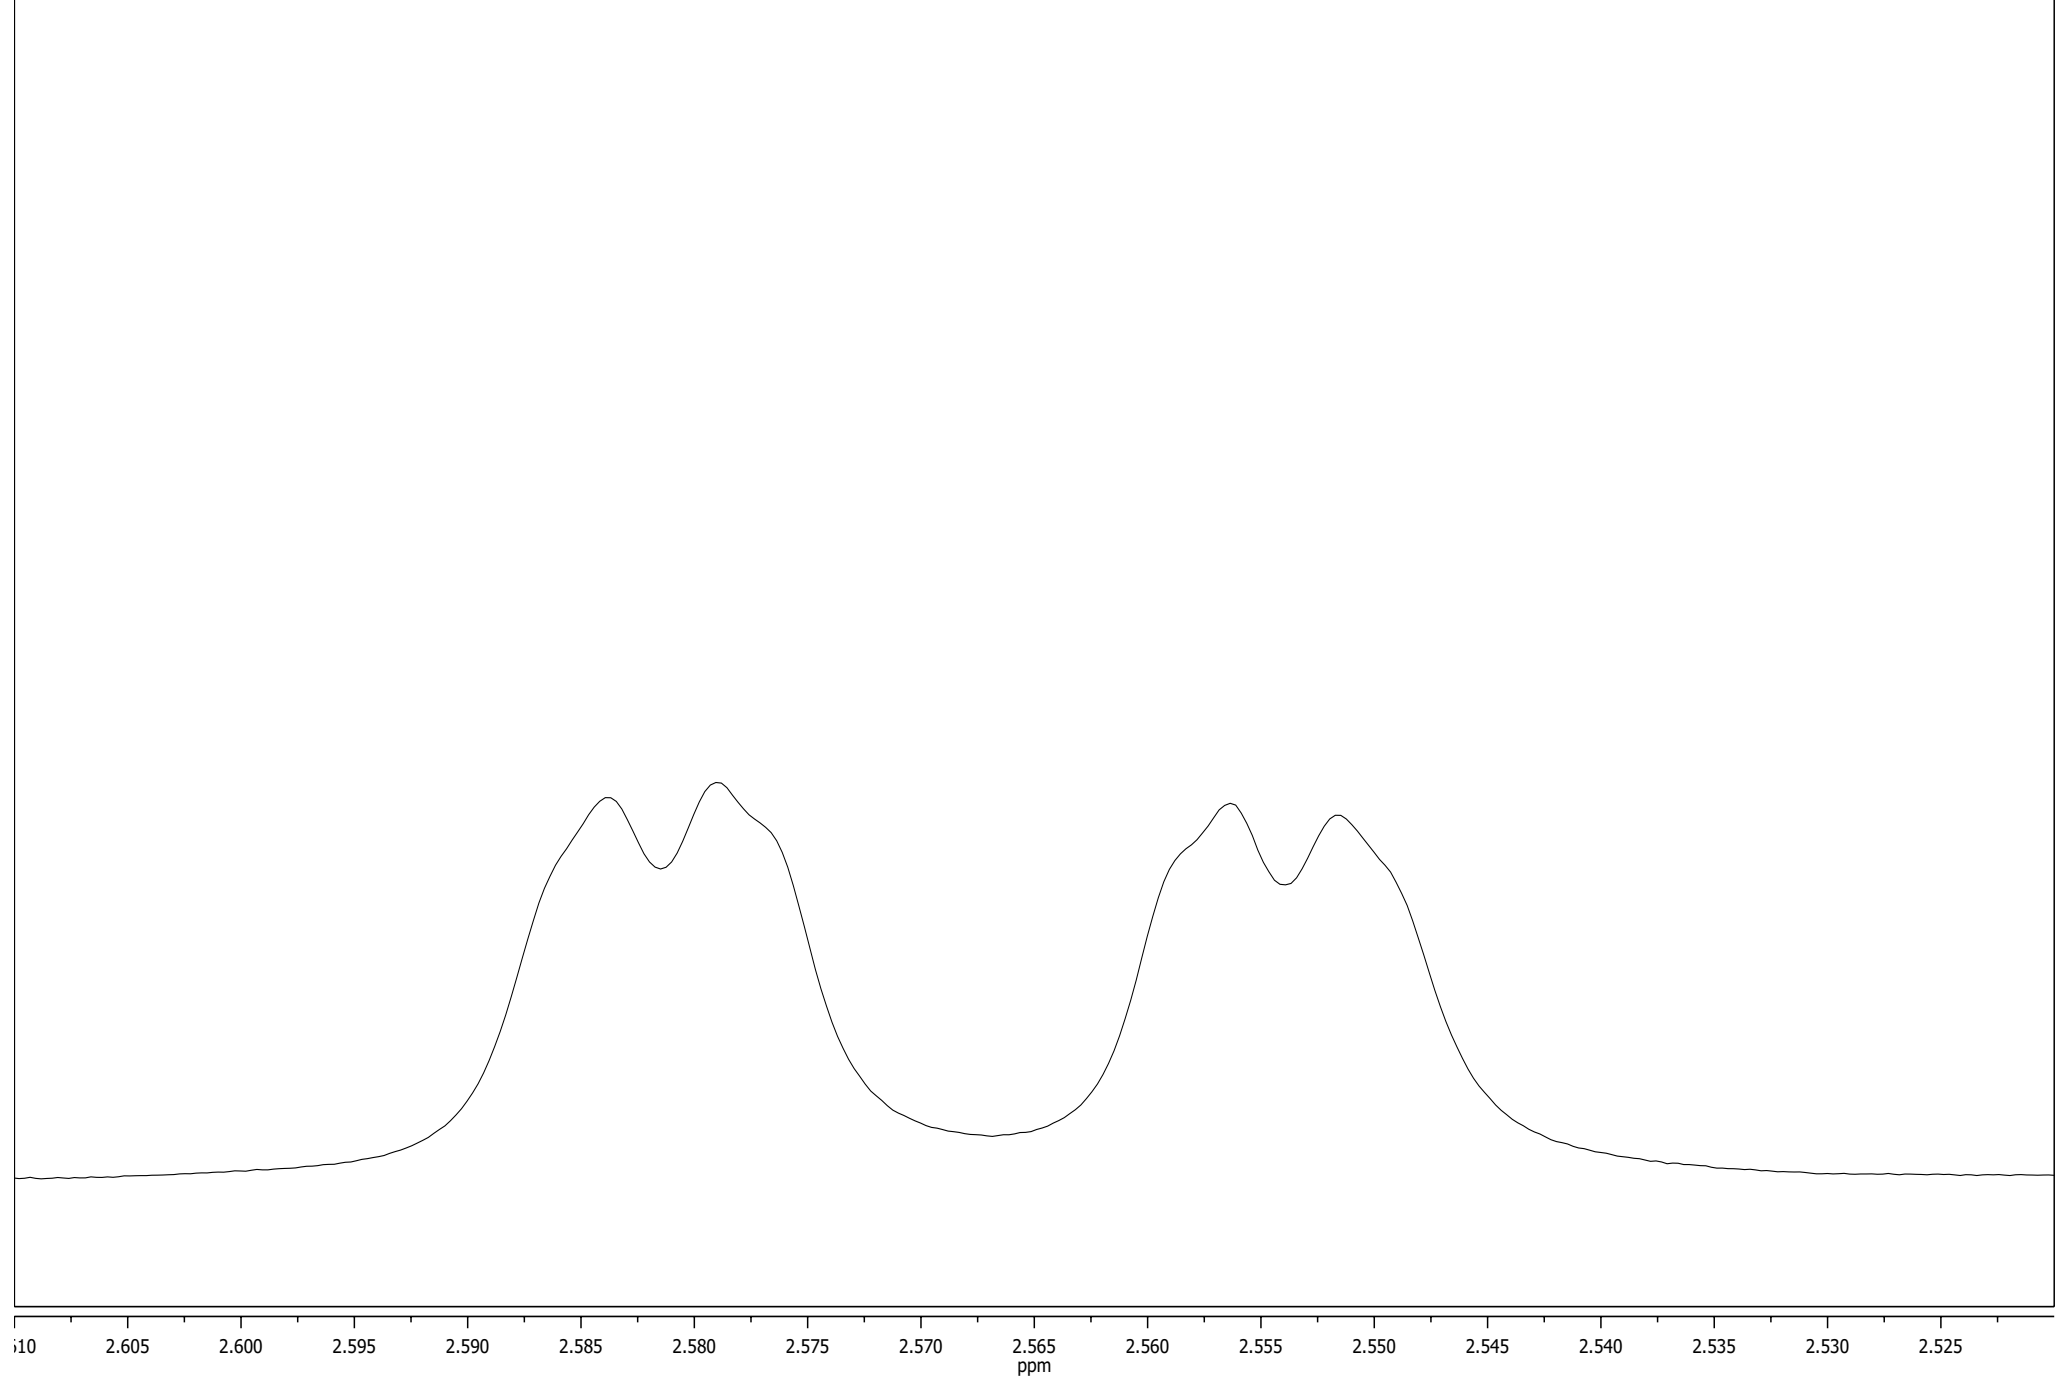

Region of interest: 2.52 - 2.61 ppm

Exponential: -1.32  
Gaussian: 0.60 GB

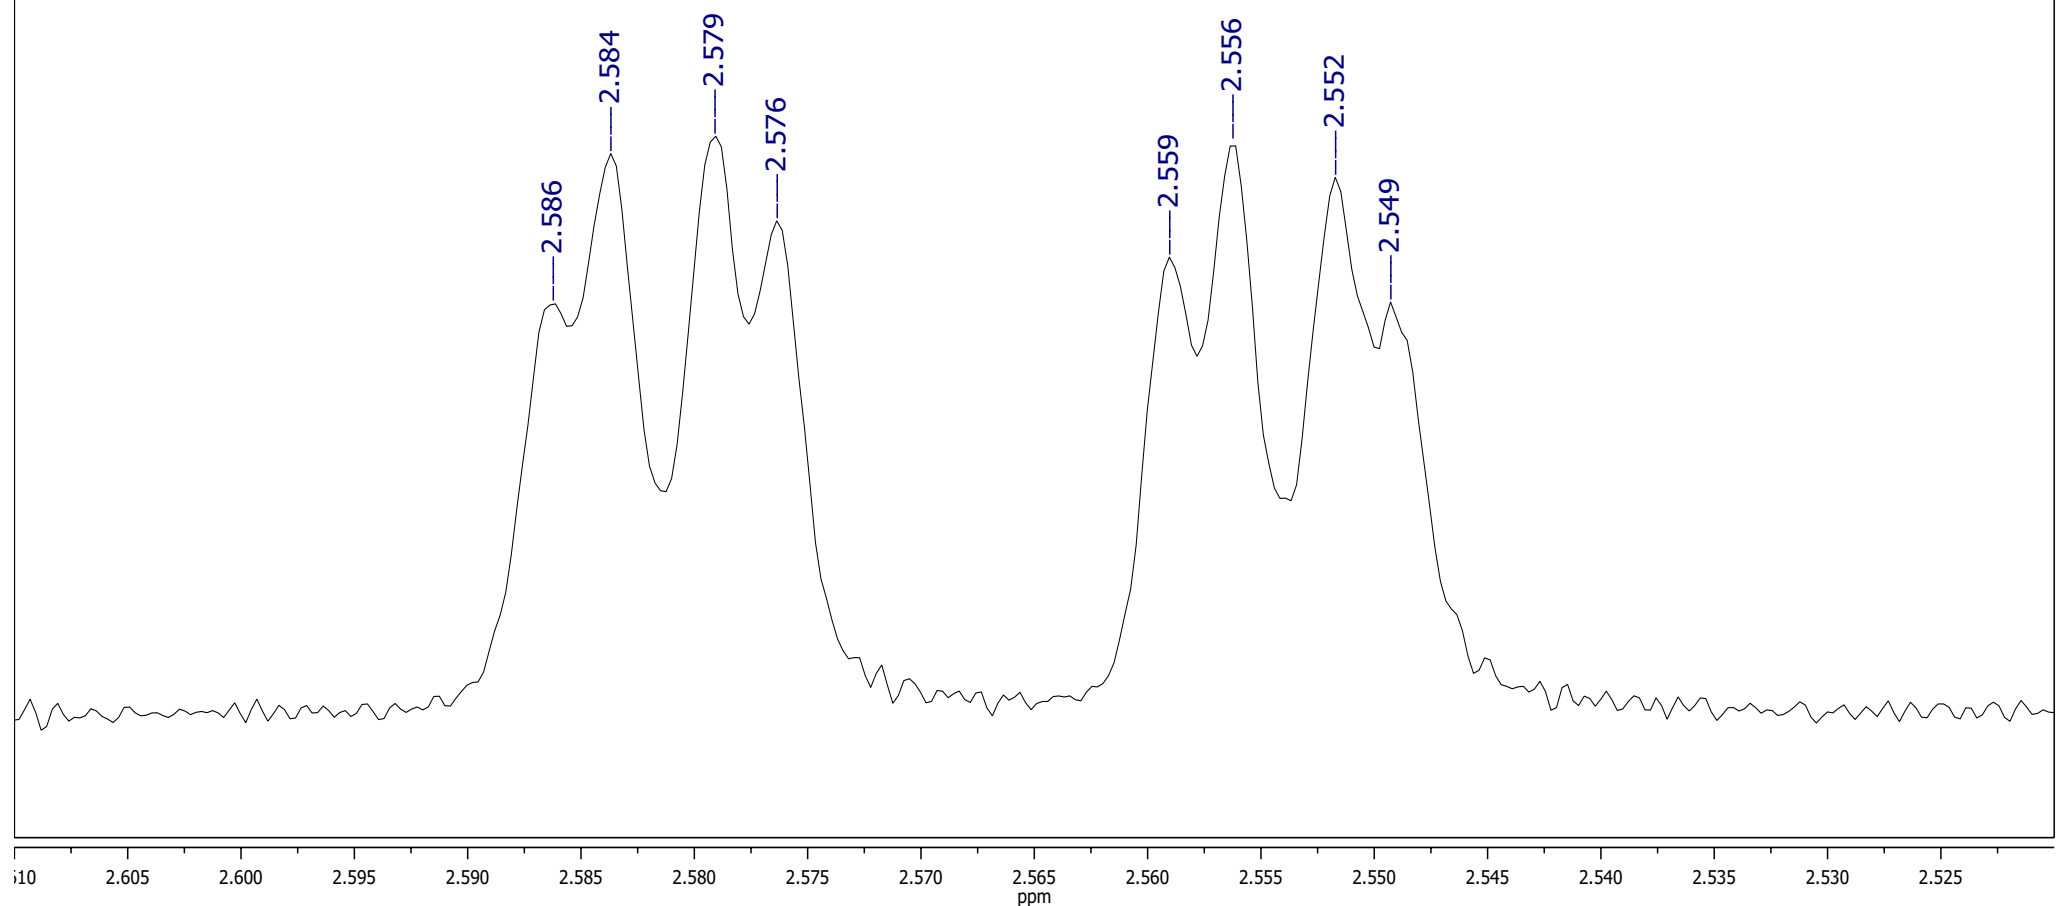

Region of interest: 2.52 - 2.61 ppm

Exponential: -1.32  
Gaussian: 0.60 GB

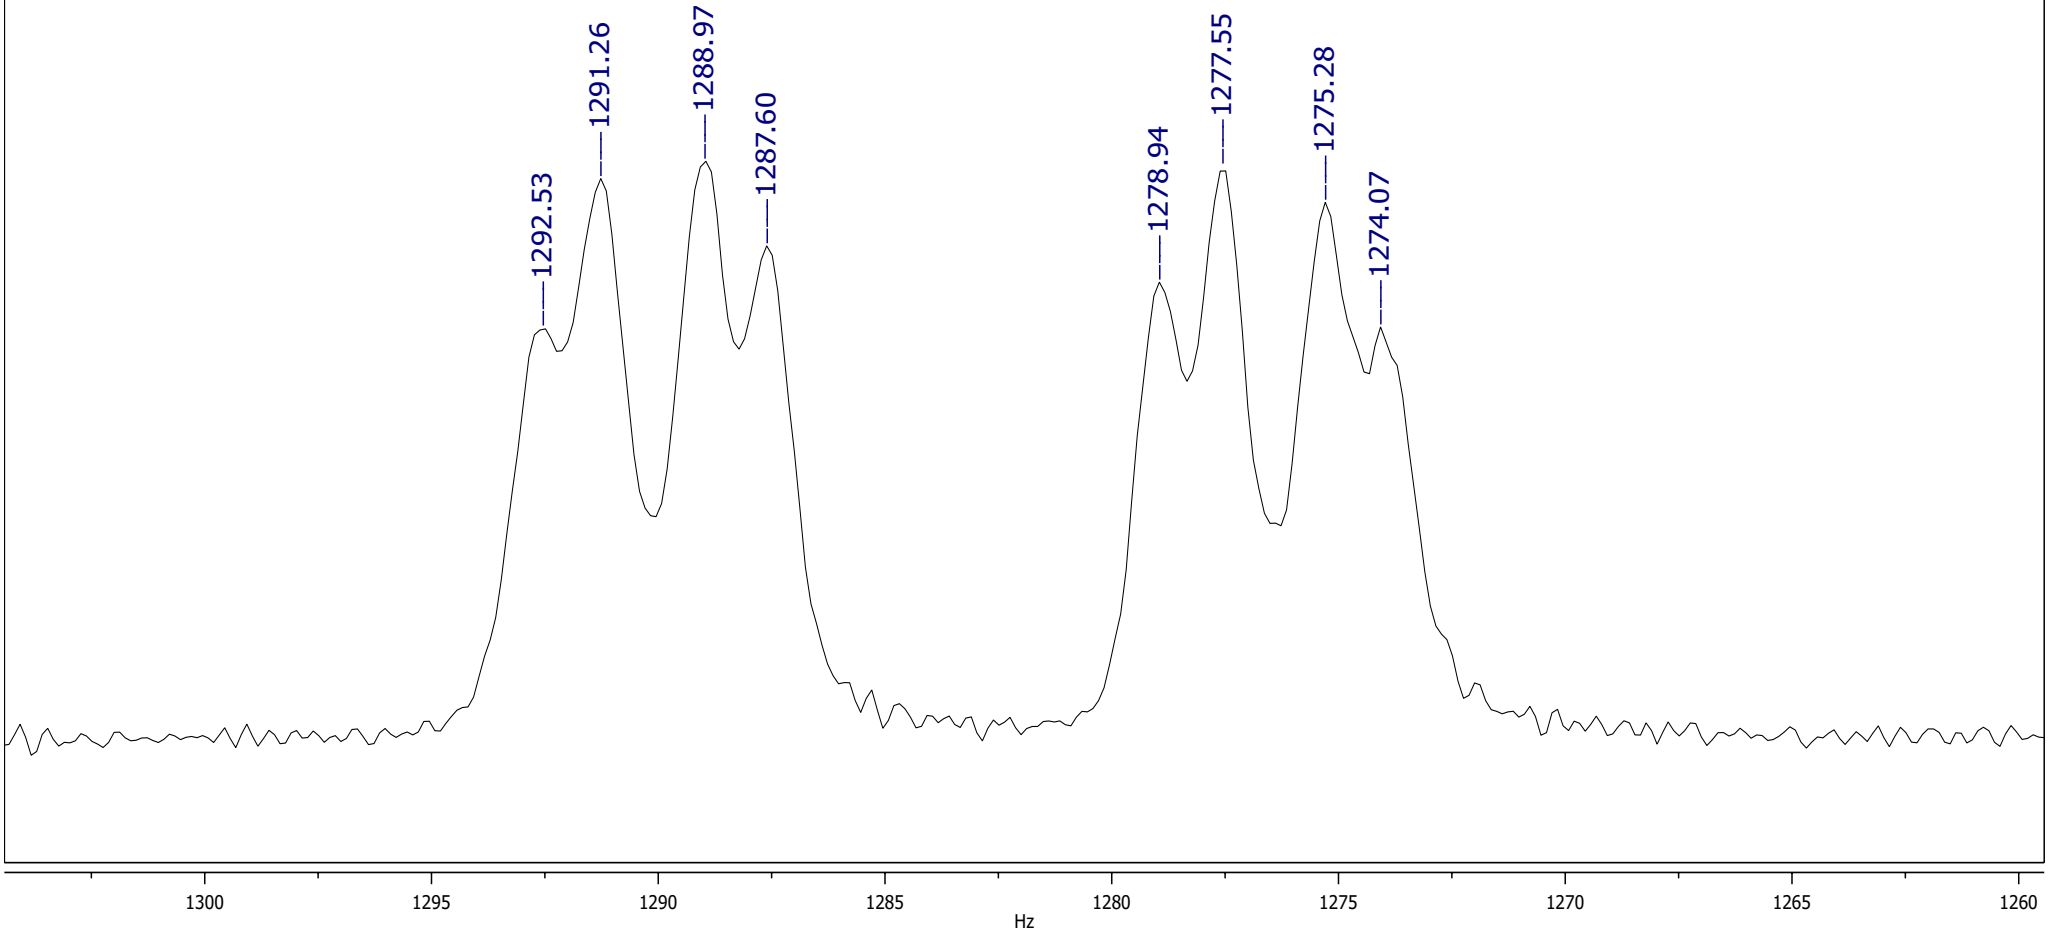

Region of interest: 2.76 - 3.45 ppm

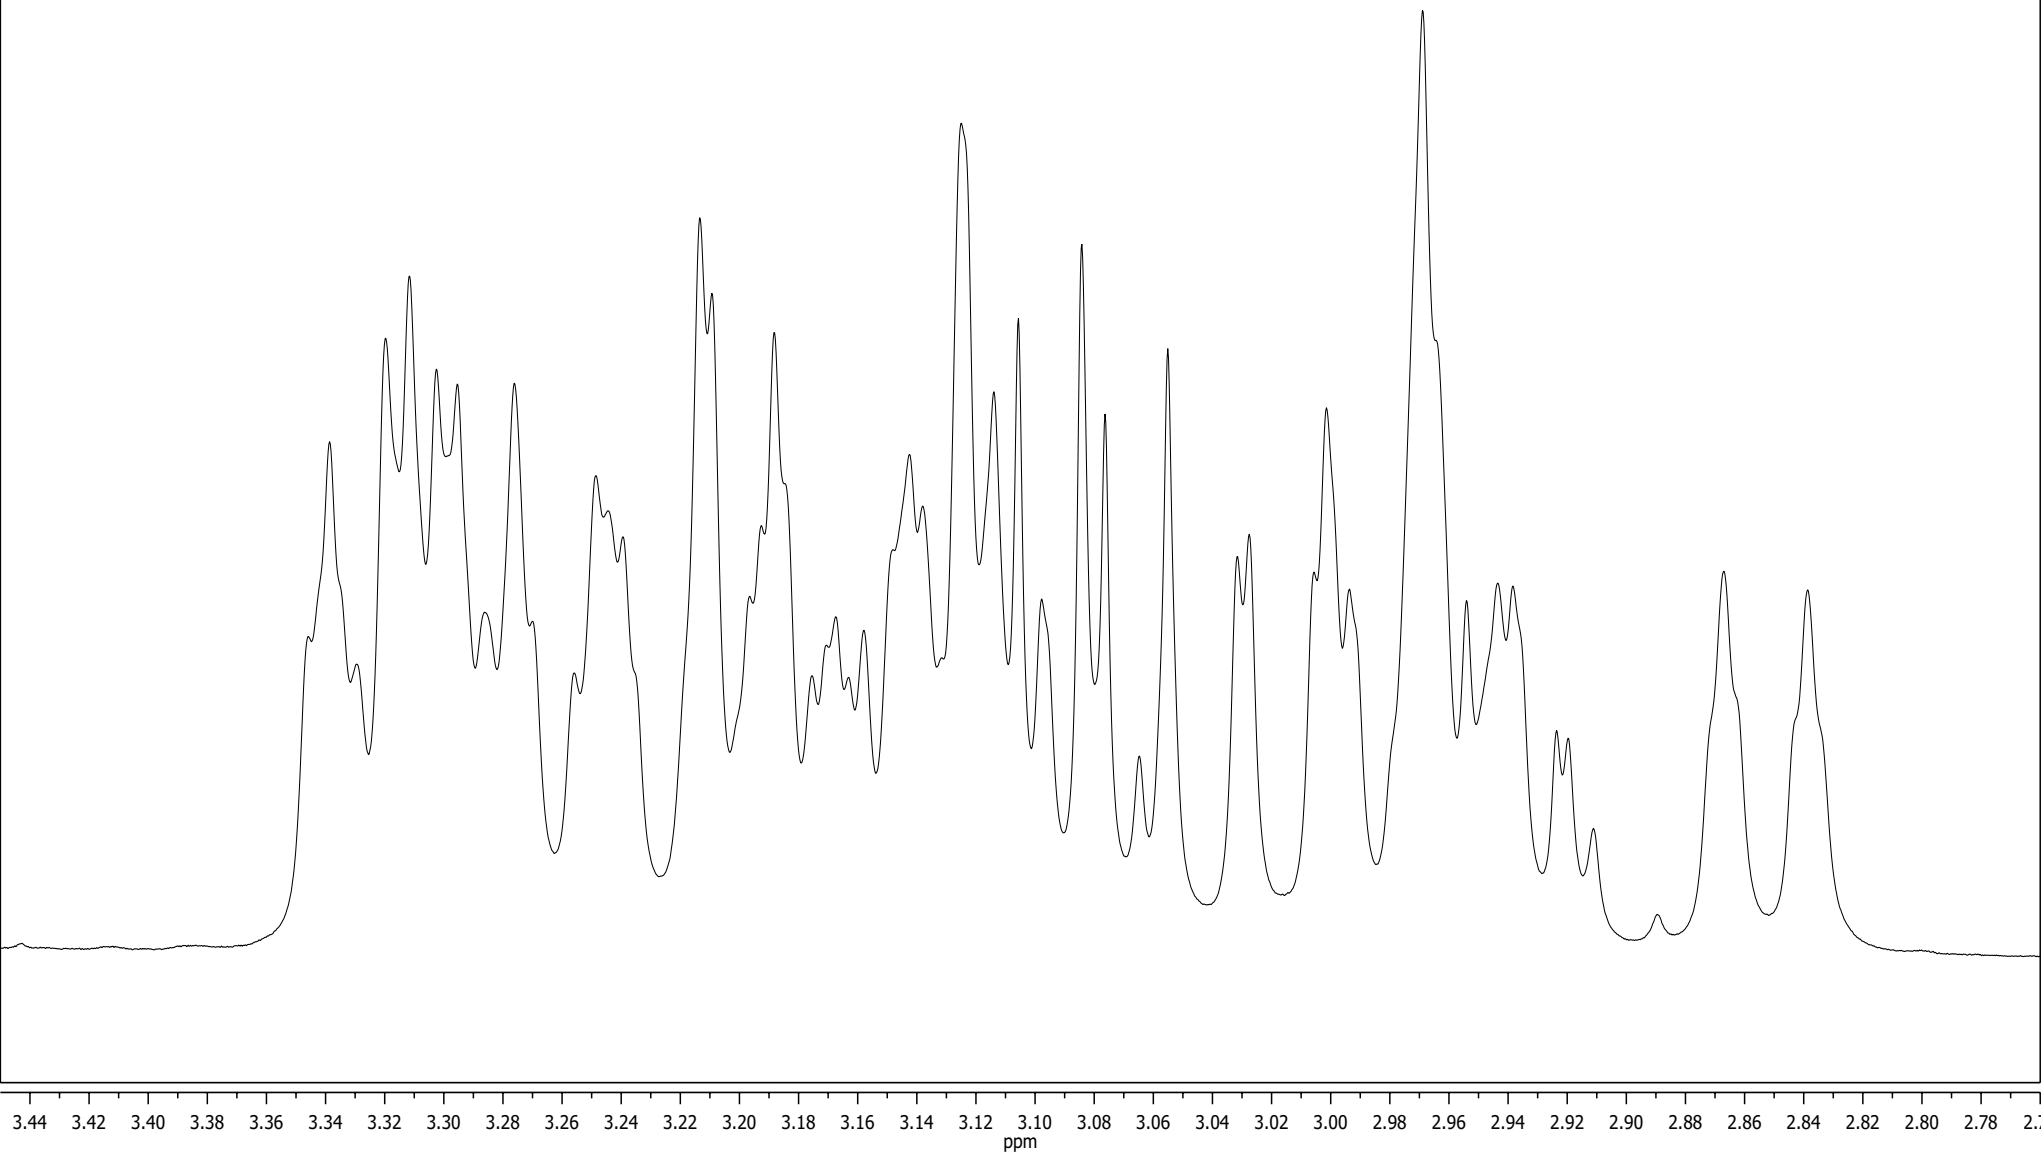

Region of interest: 2.76 - 3.45 ppm

Exponential: -1.32

Gaussian: 0.60 GB

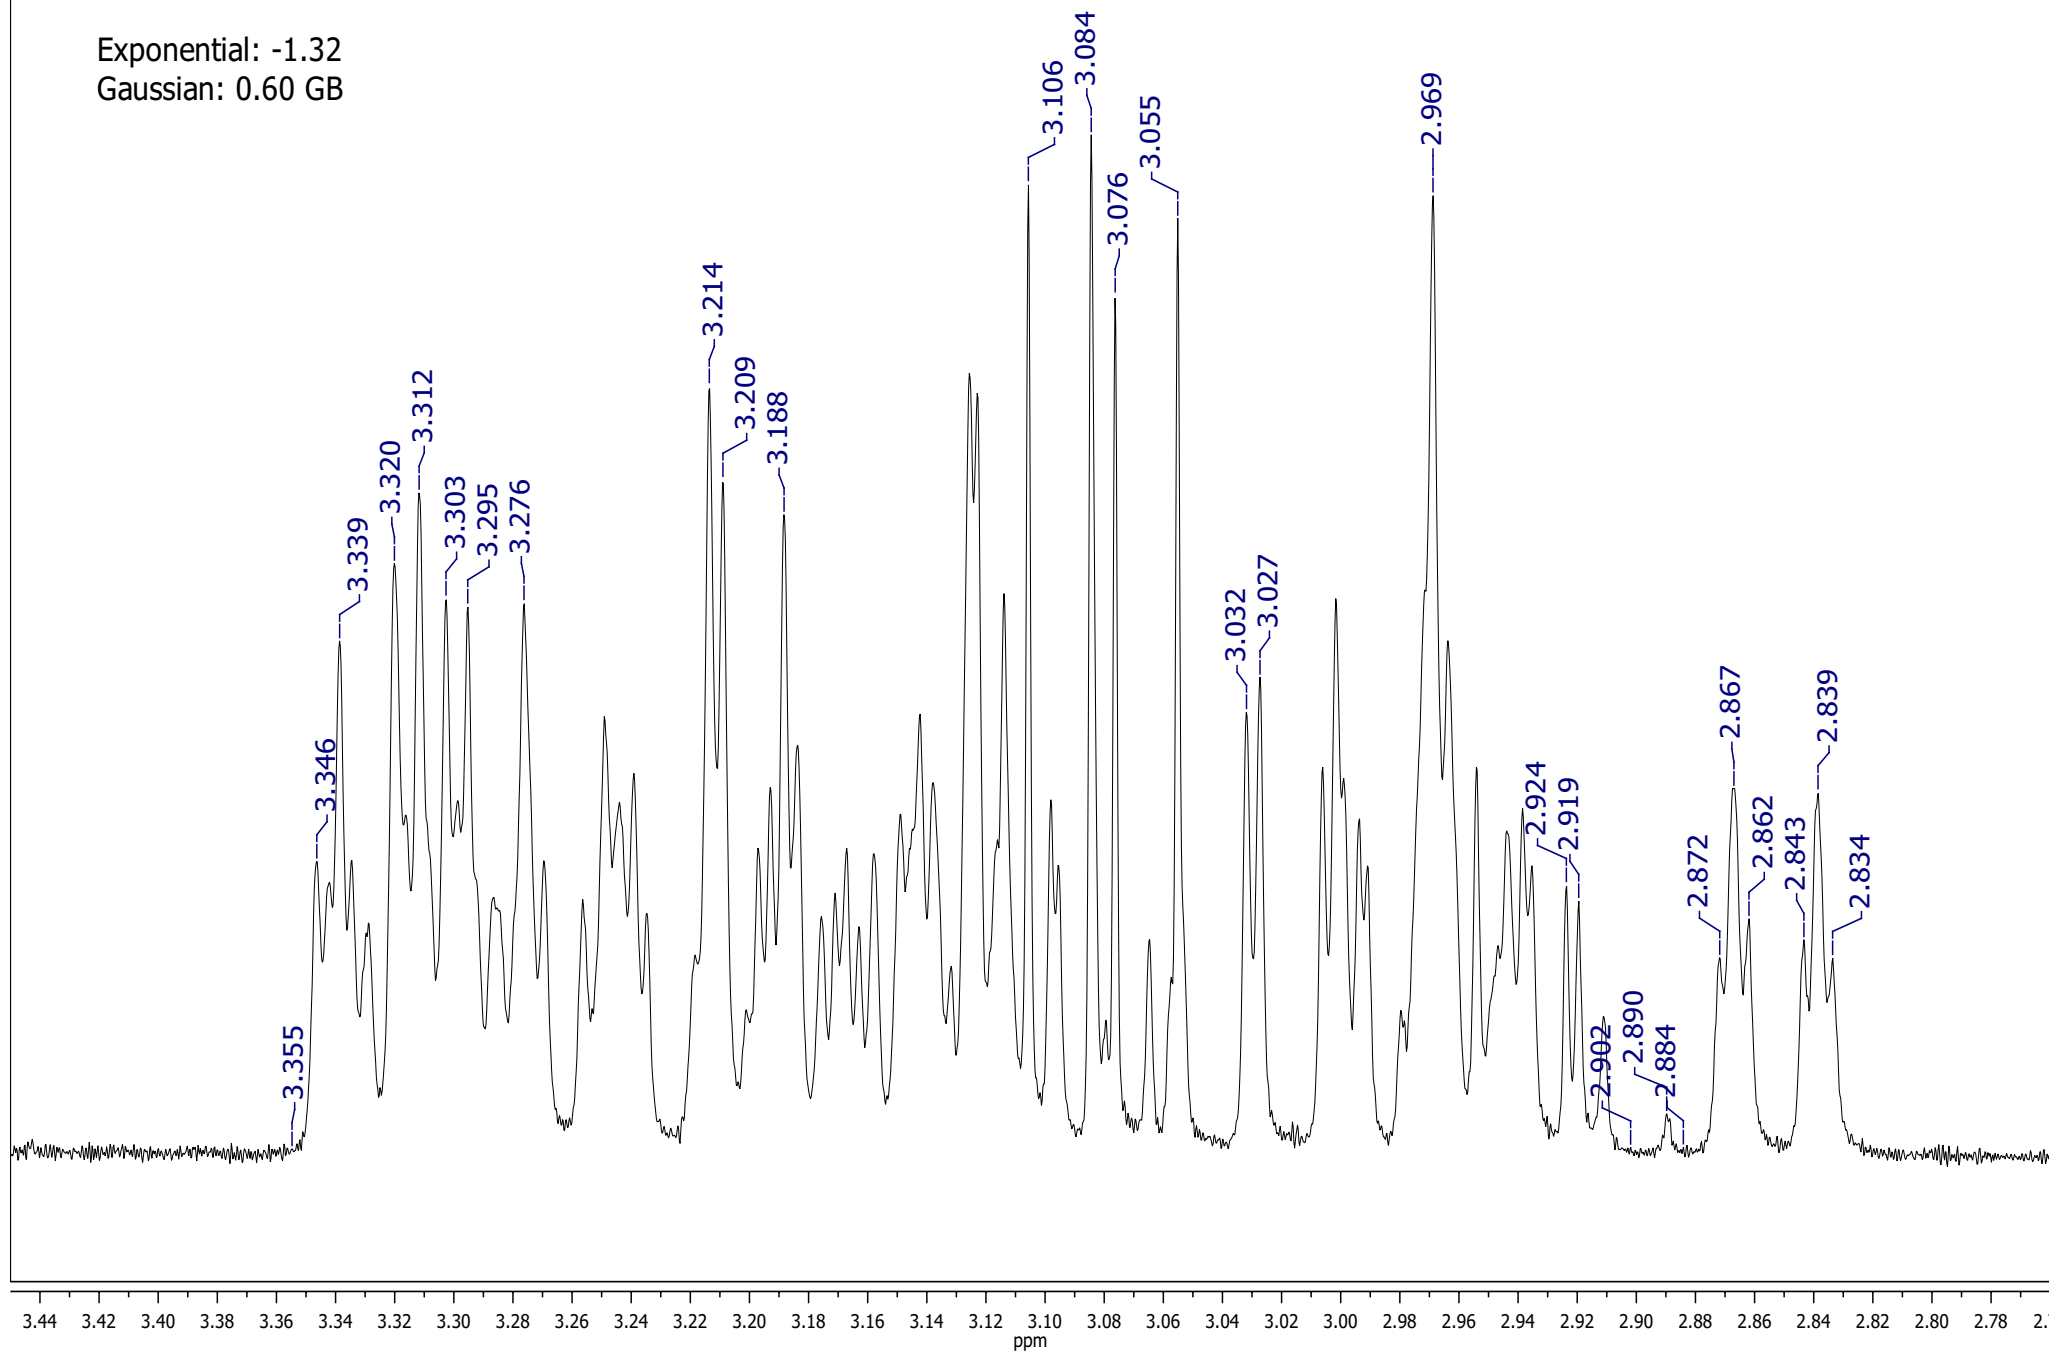

Region of interest: 2.76 - 3.45 ppm

Exponential: -1.32

Gaussian: 0.60 GB

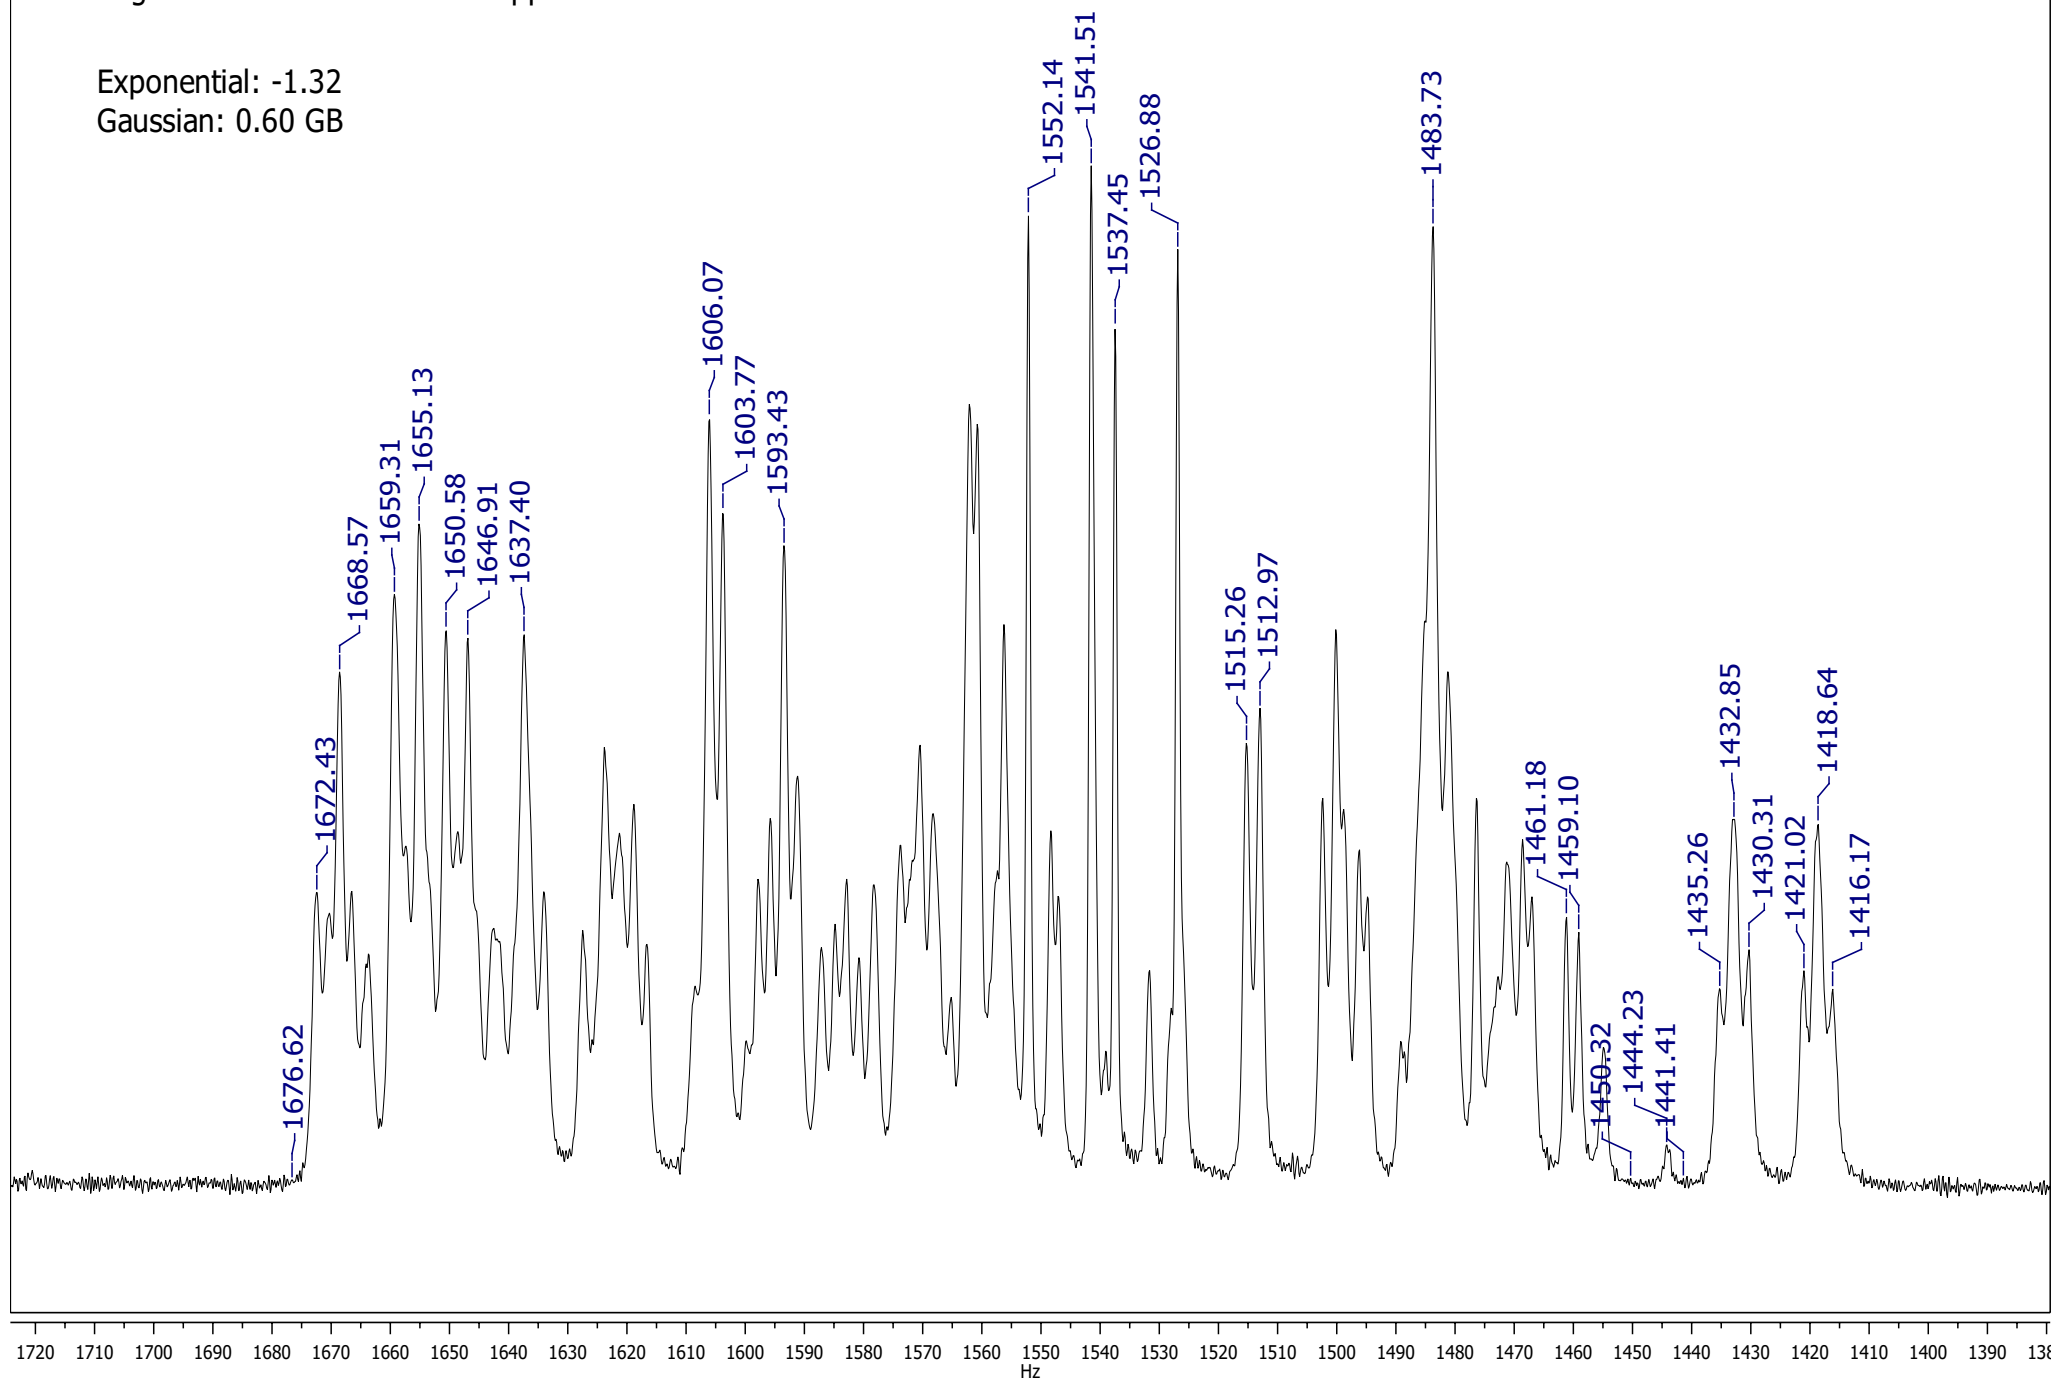

Region of interest: 3.49 - 3.78 ppm

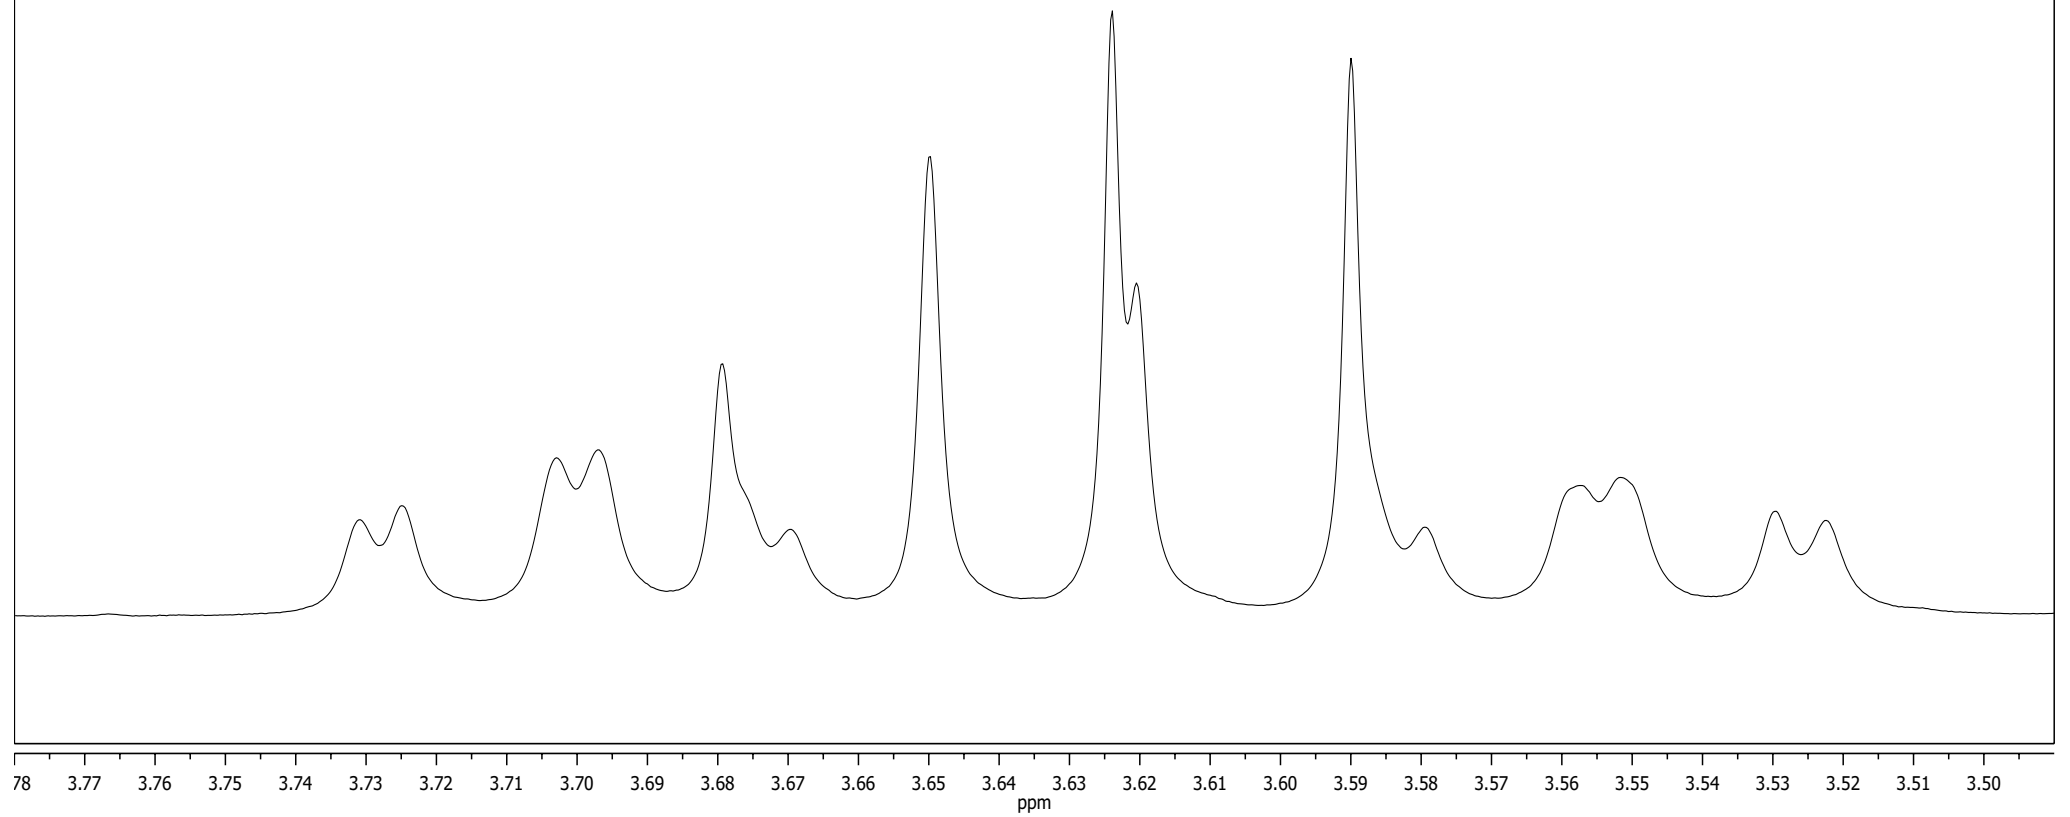

Region of interest: 3.49 - 3.78 ppm

Exponential: -1.32

Gaussian: 0.60 GB

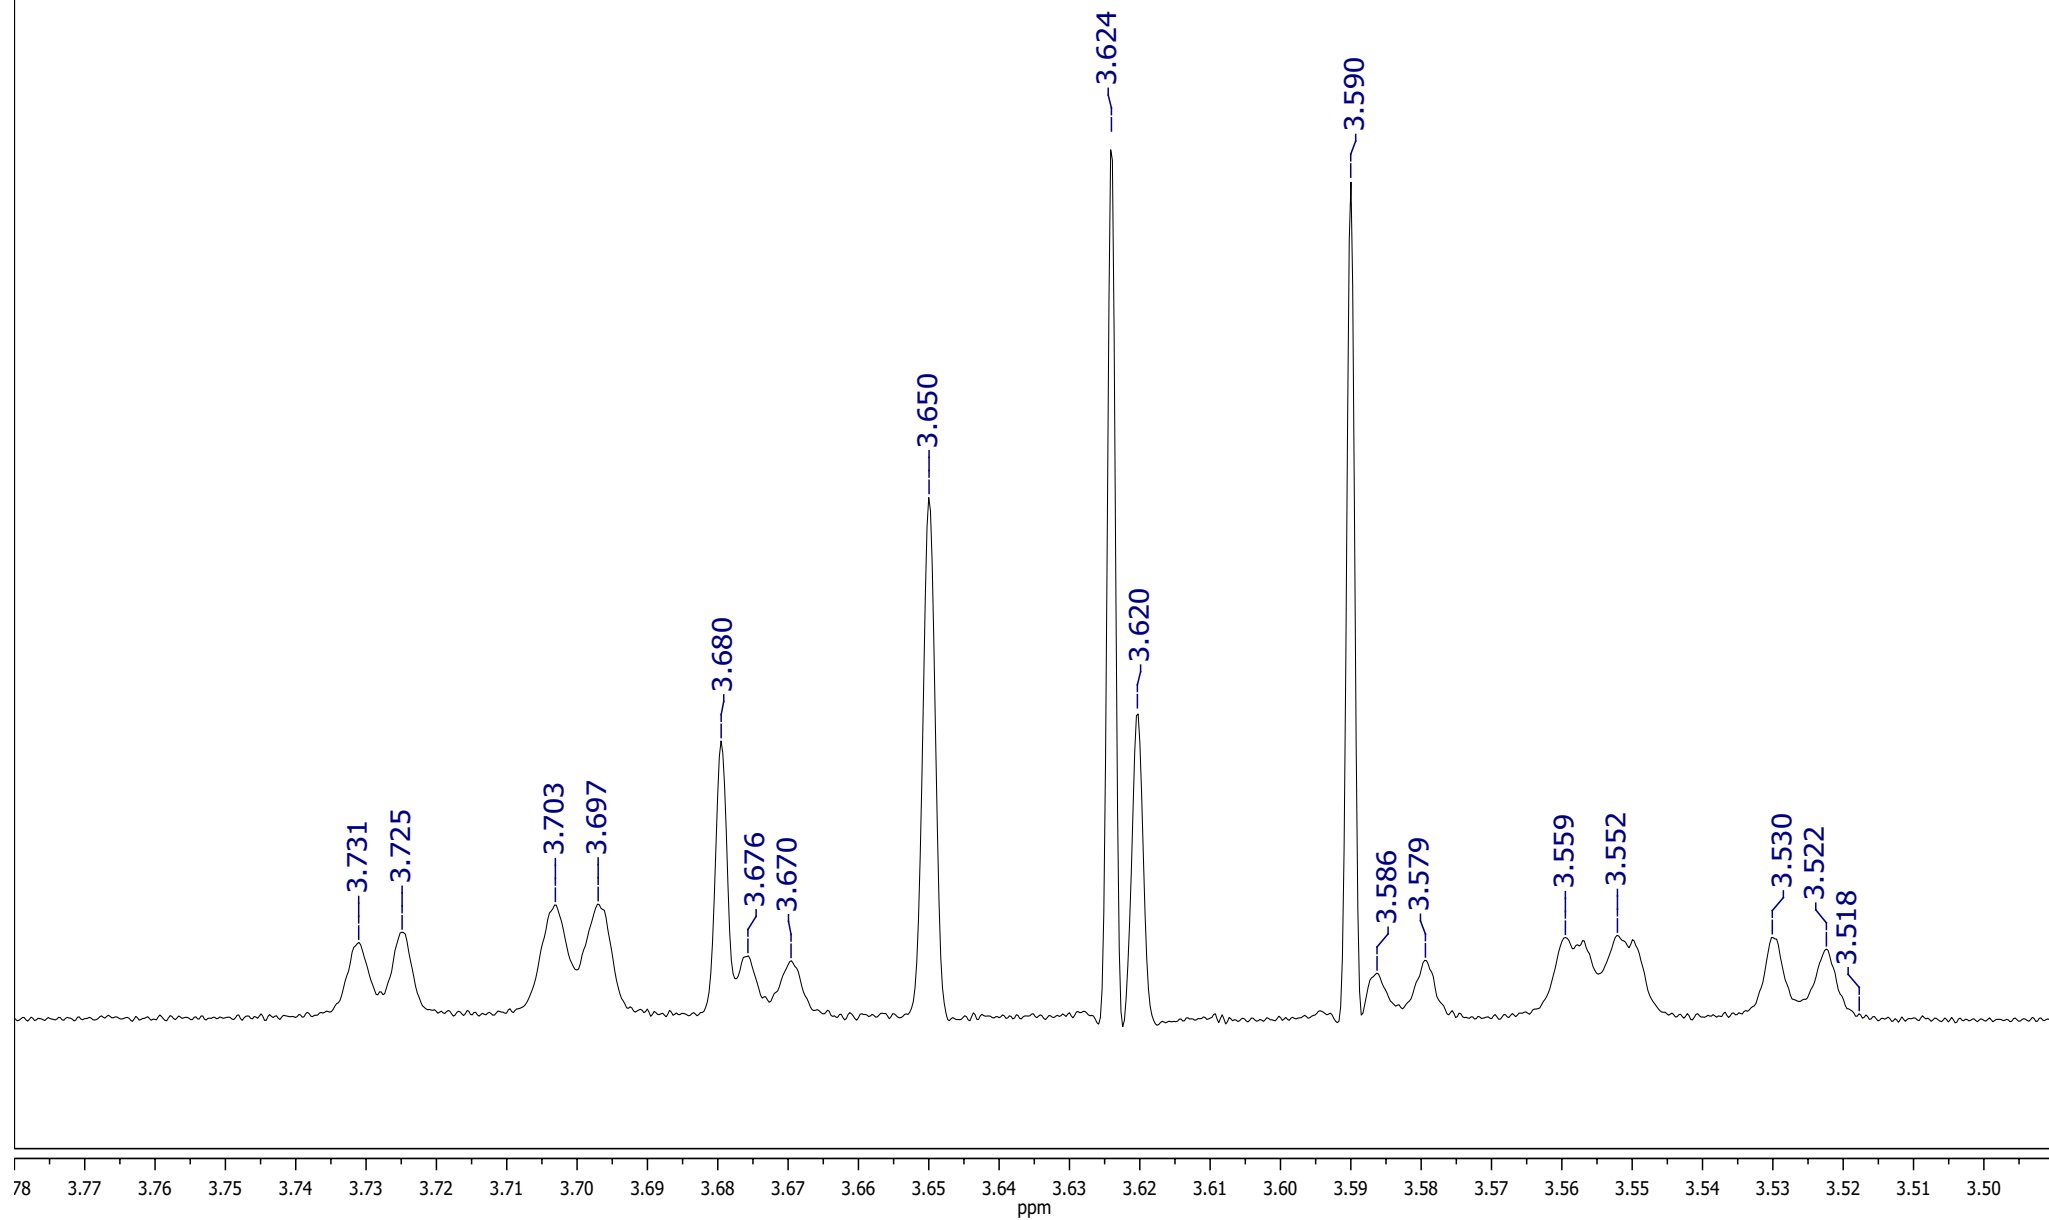

Region of interest: 3.49 - 3.78 ppm

Exponential: -1.32  
Gaussian: 0.60 GB

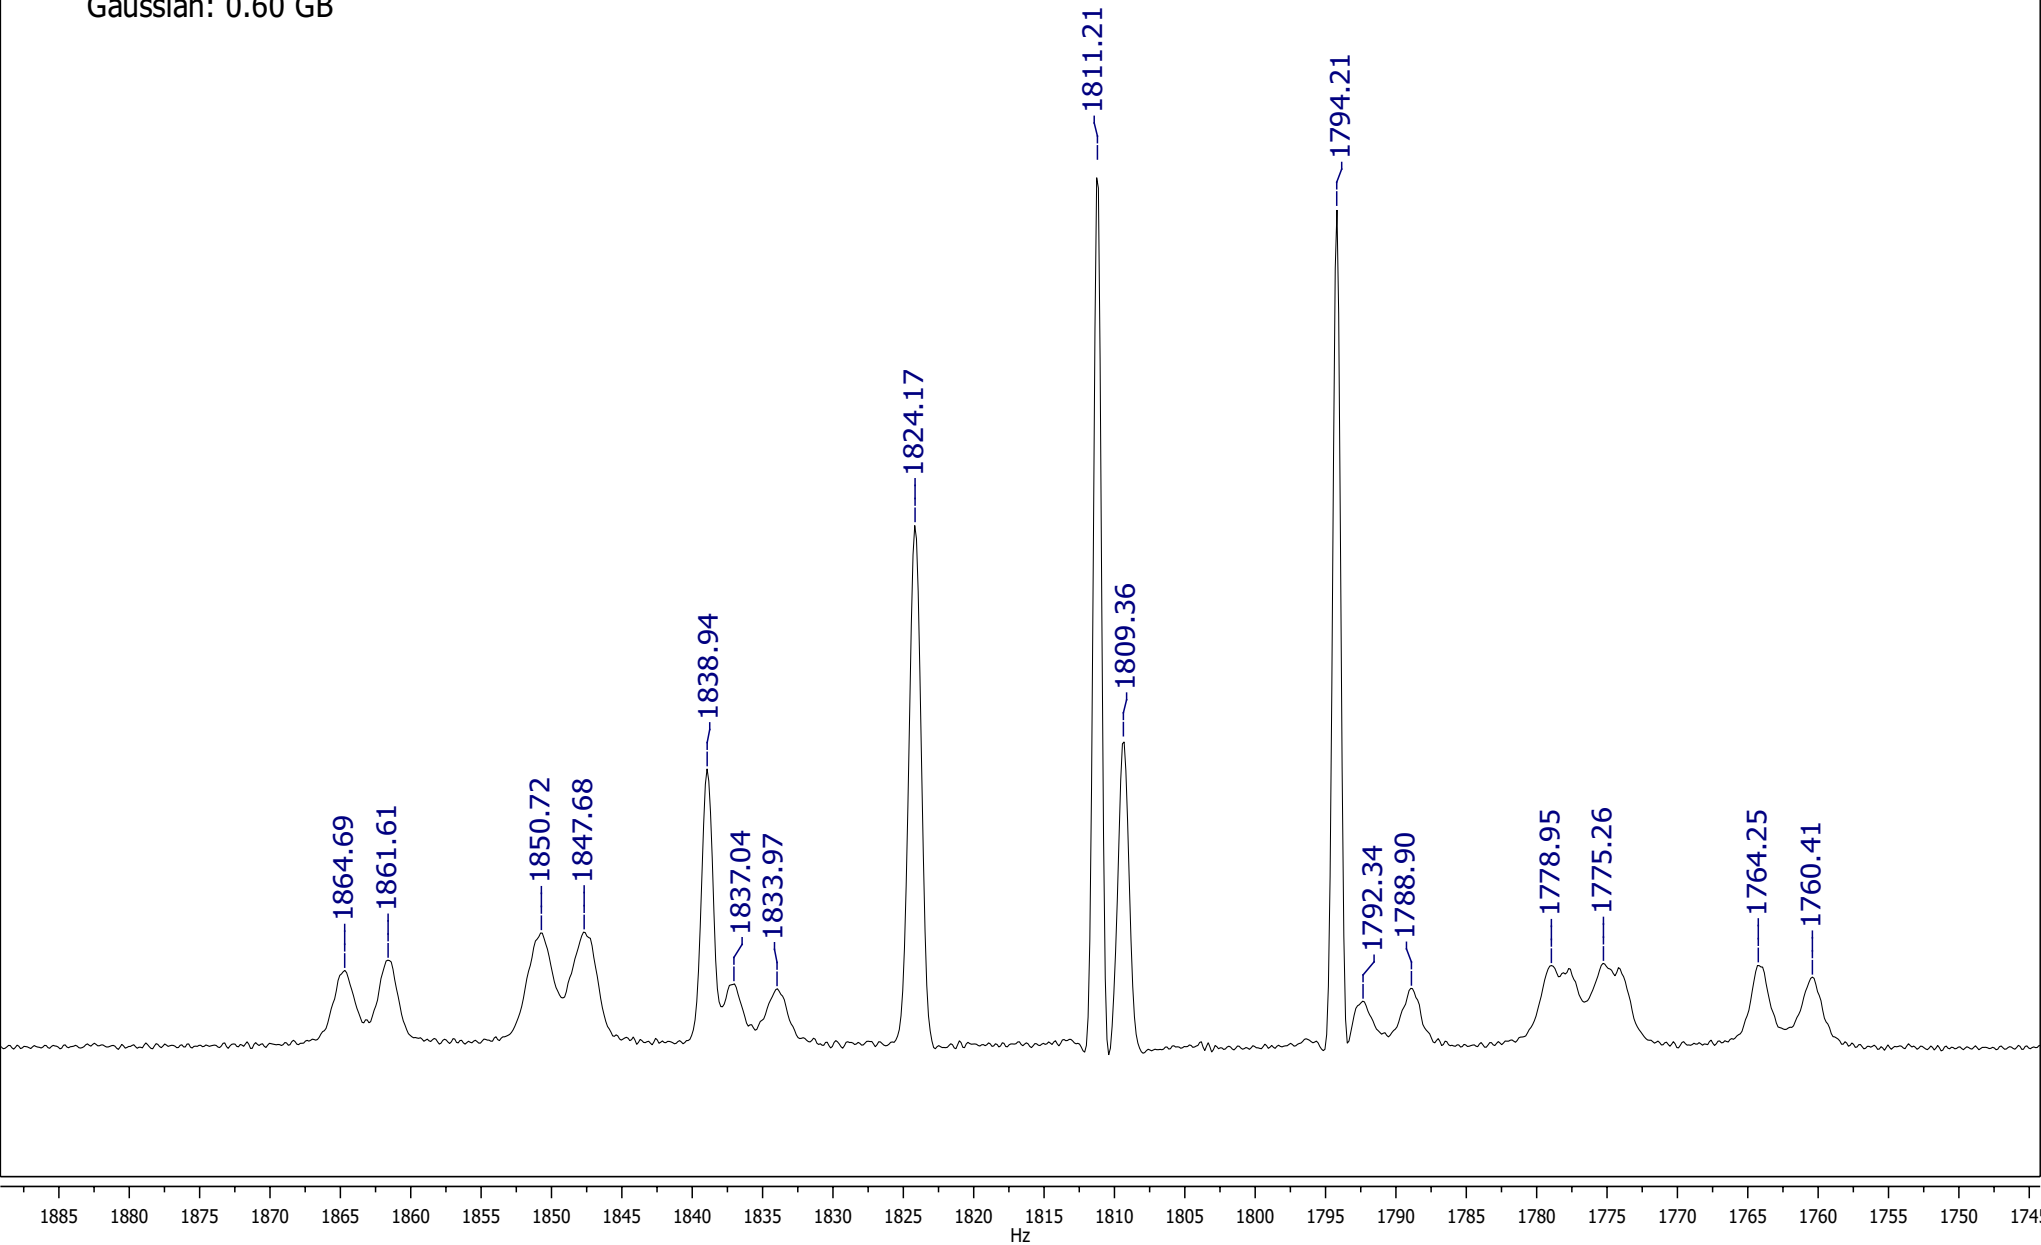

Region of interest: 3.78 - 4.15 ppm

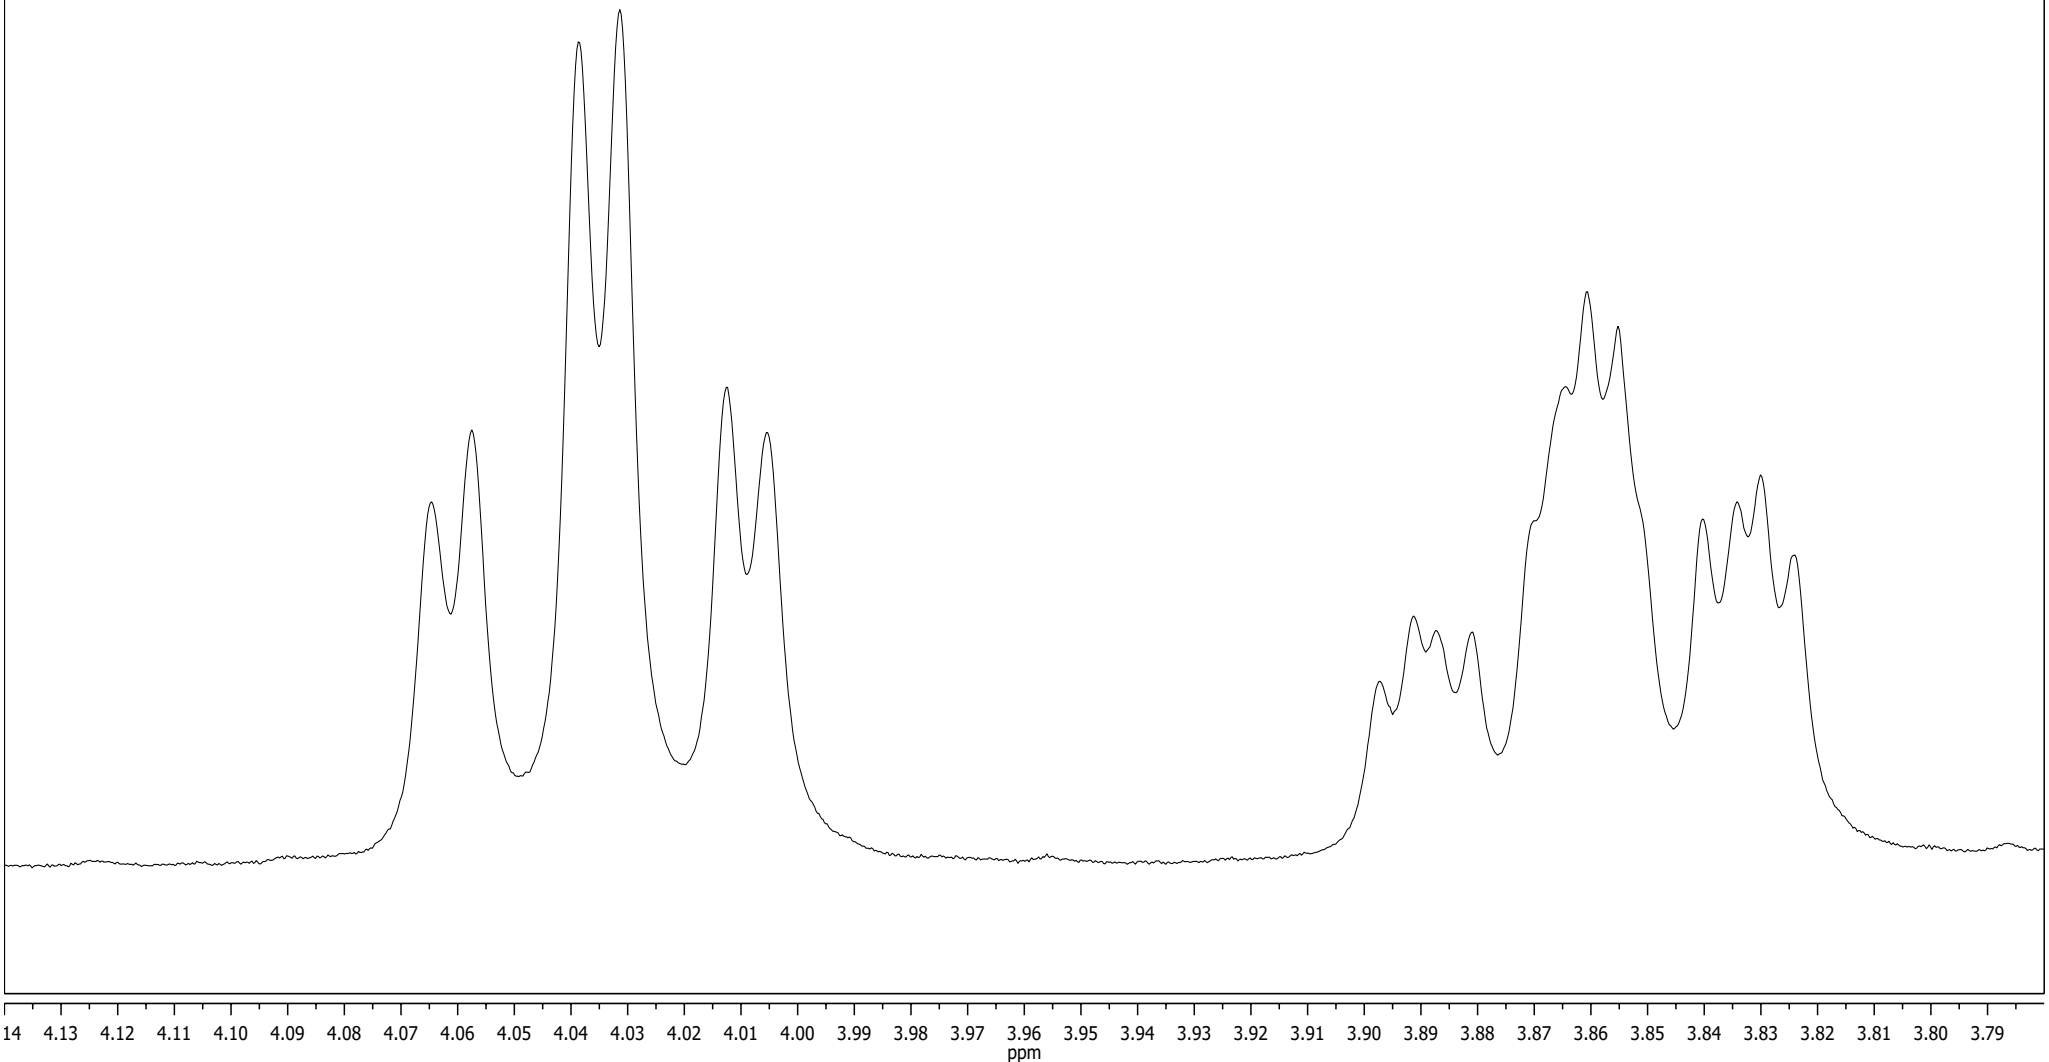

Region of interest: 3.78 - 4.15 ppm

Exponential: -1.32

Gaussian: 0.70 GB

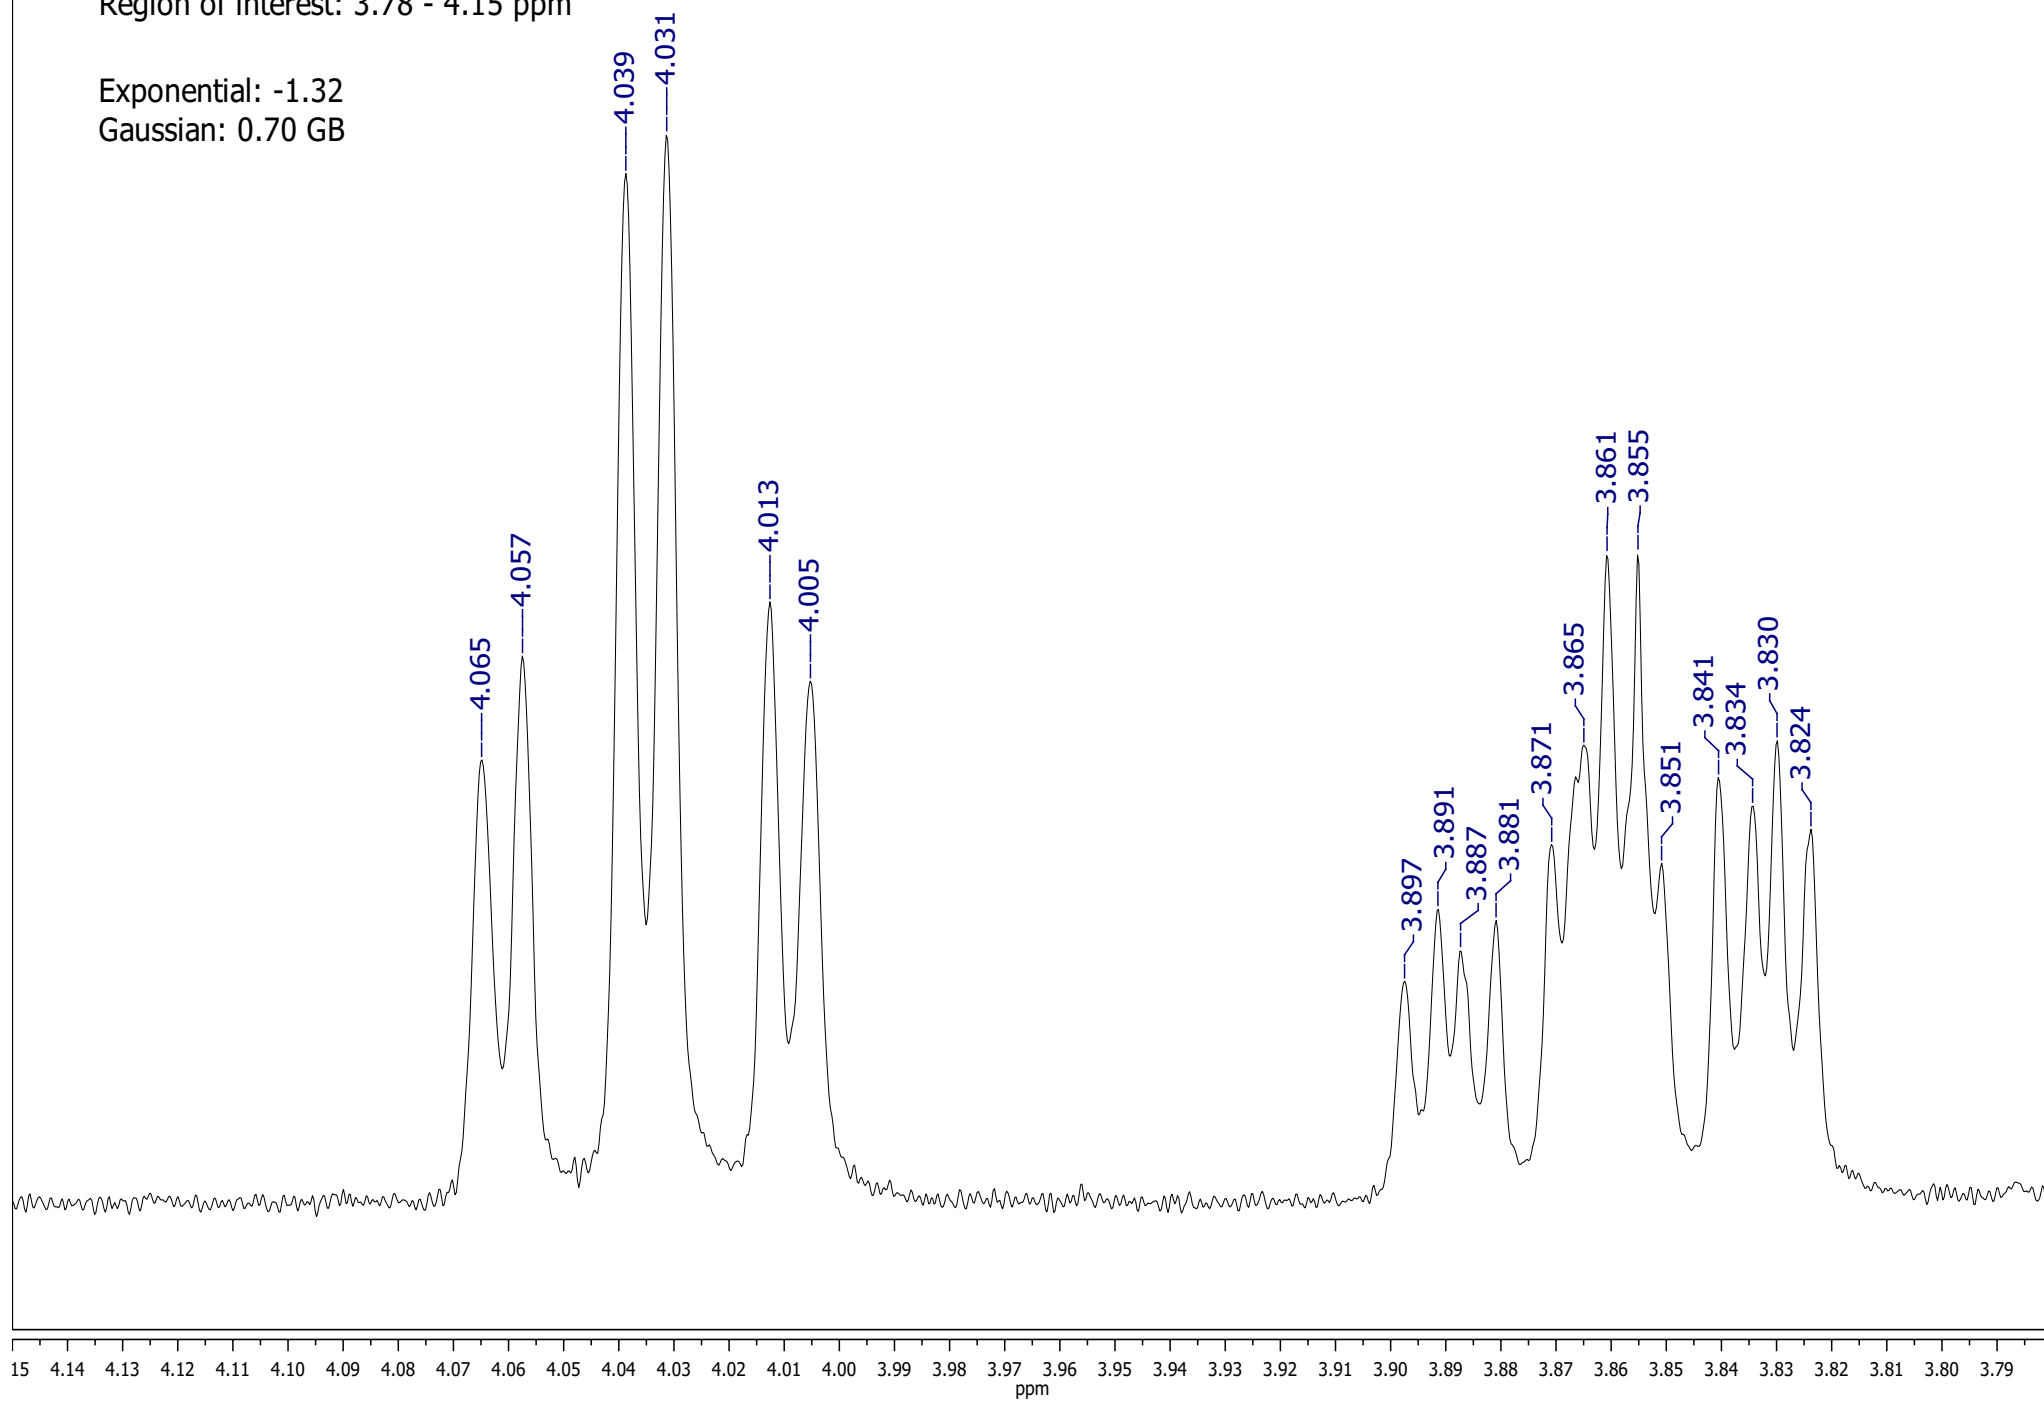

Region of interest: 3.78 - 4.15 ppm

Exponential: -1.32

Gaussian: 0.70 GB

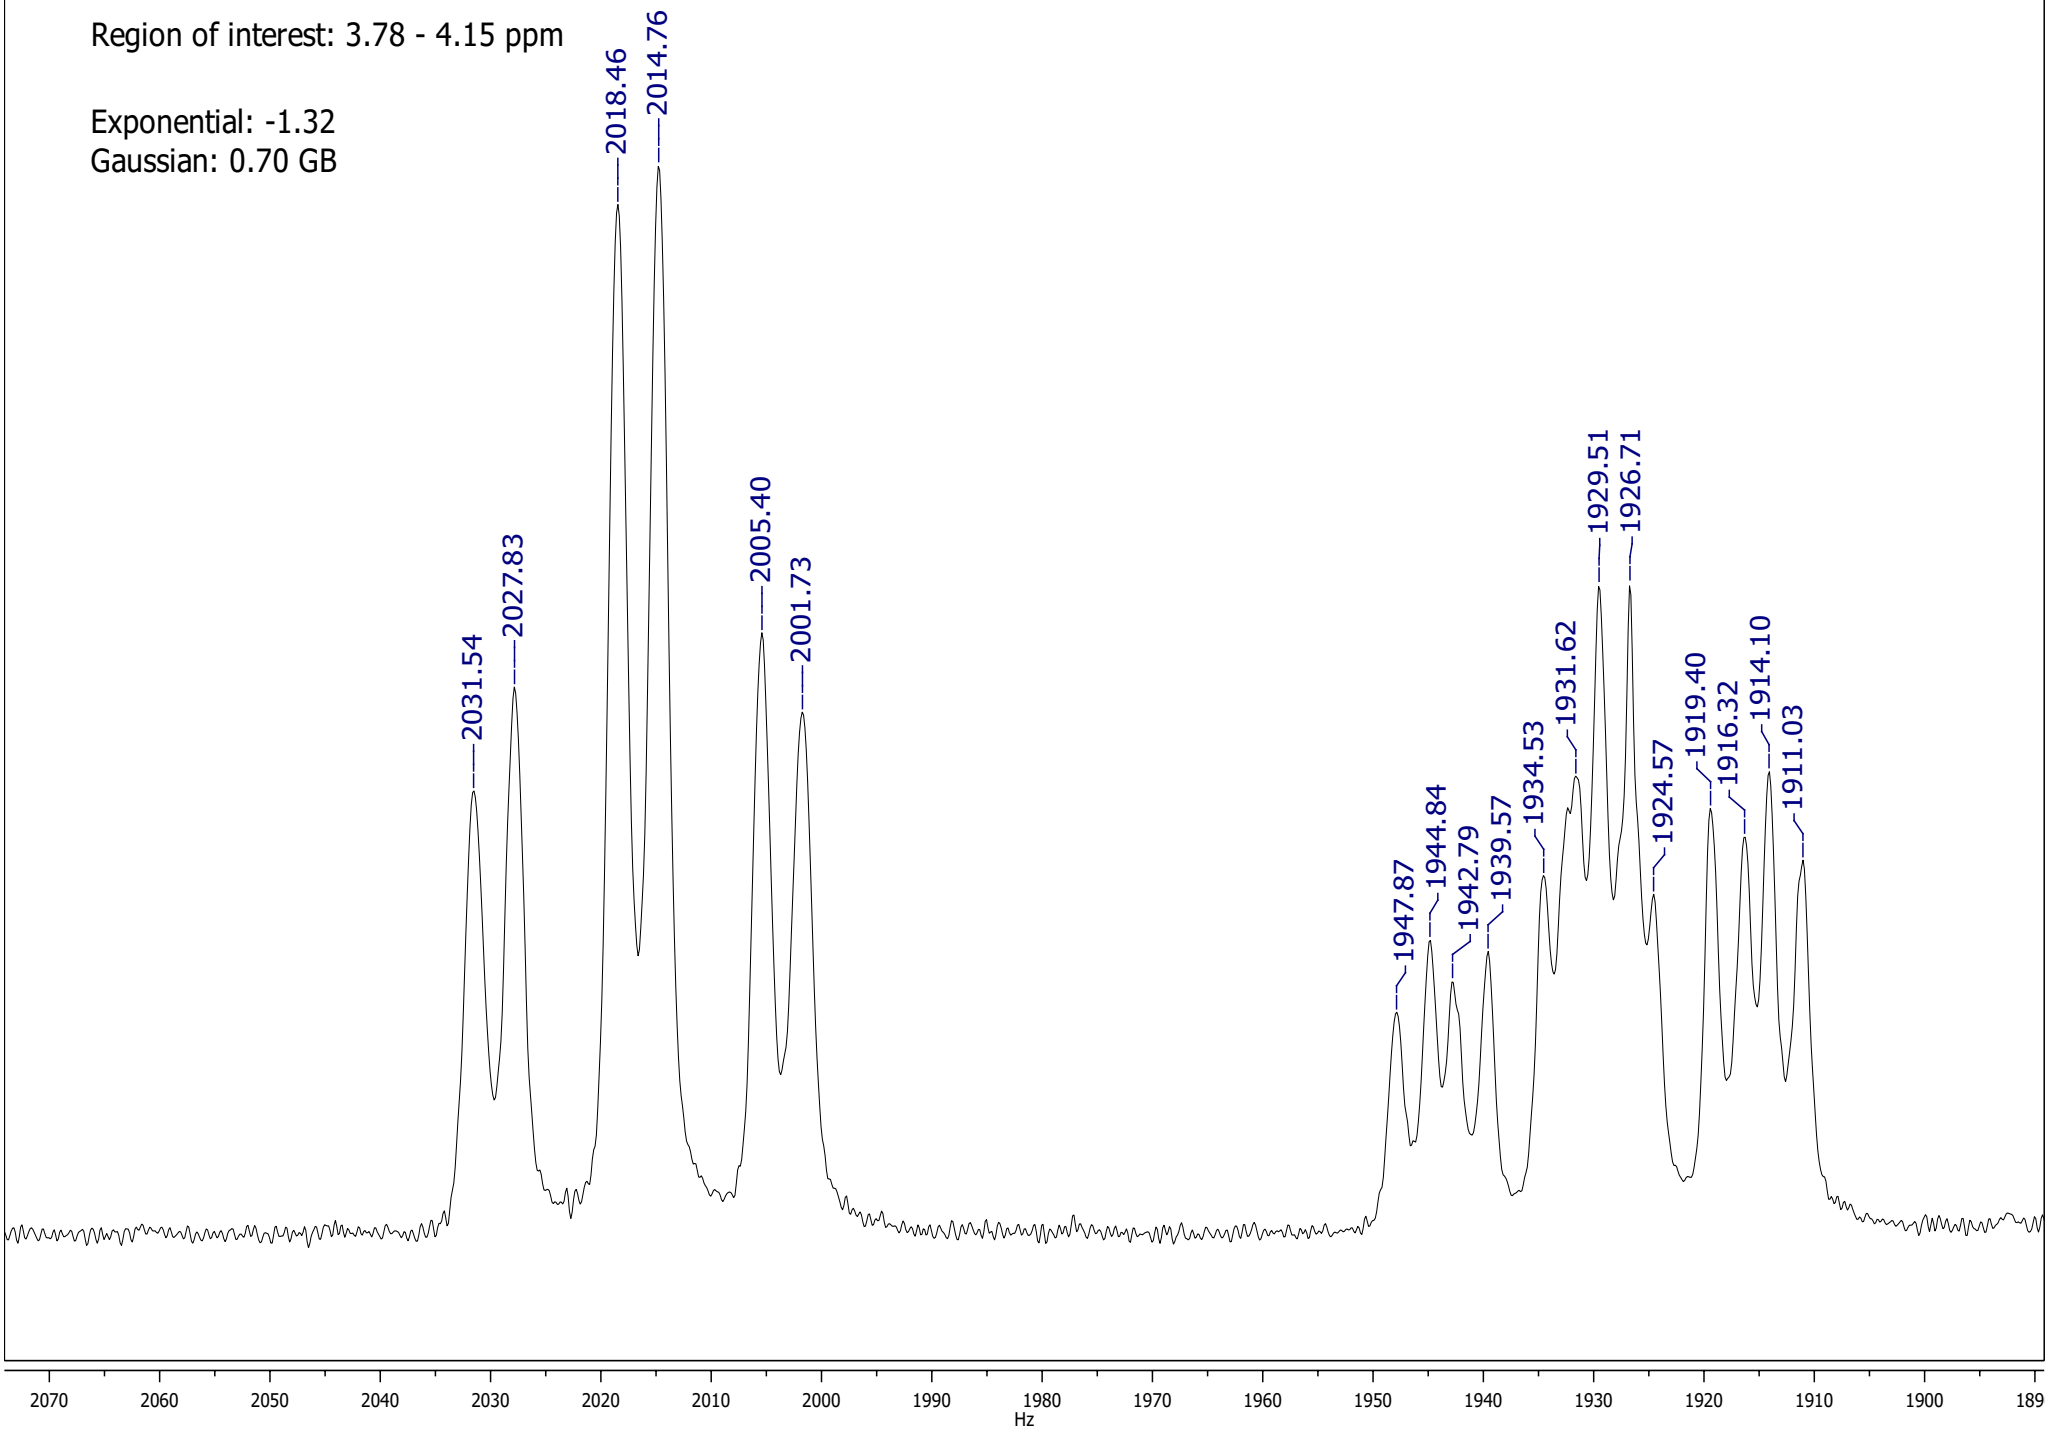

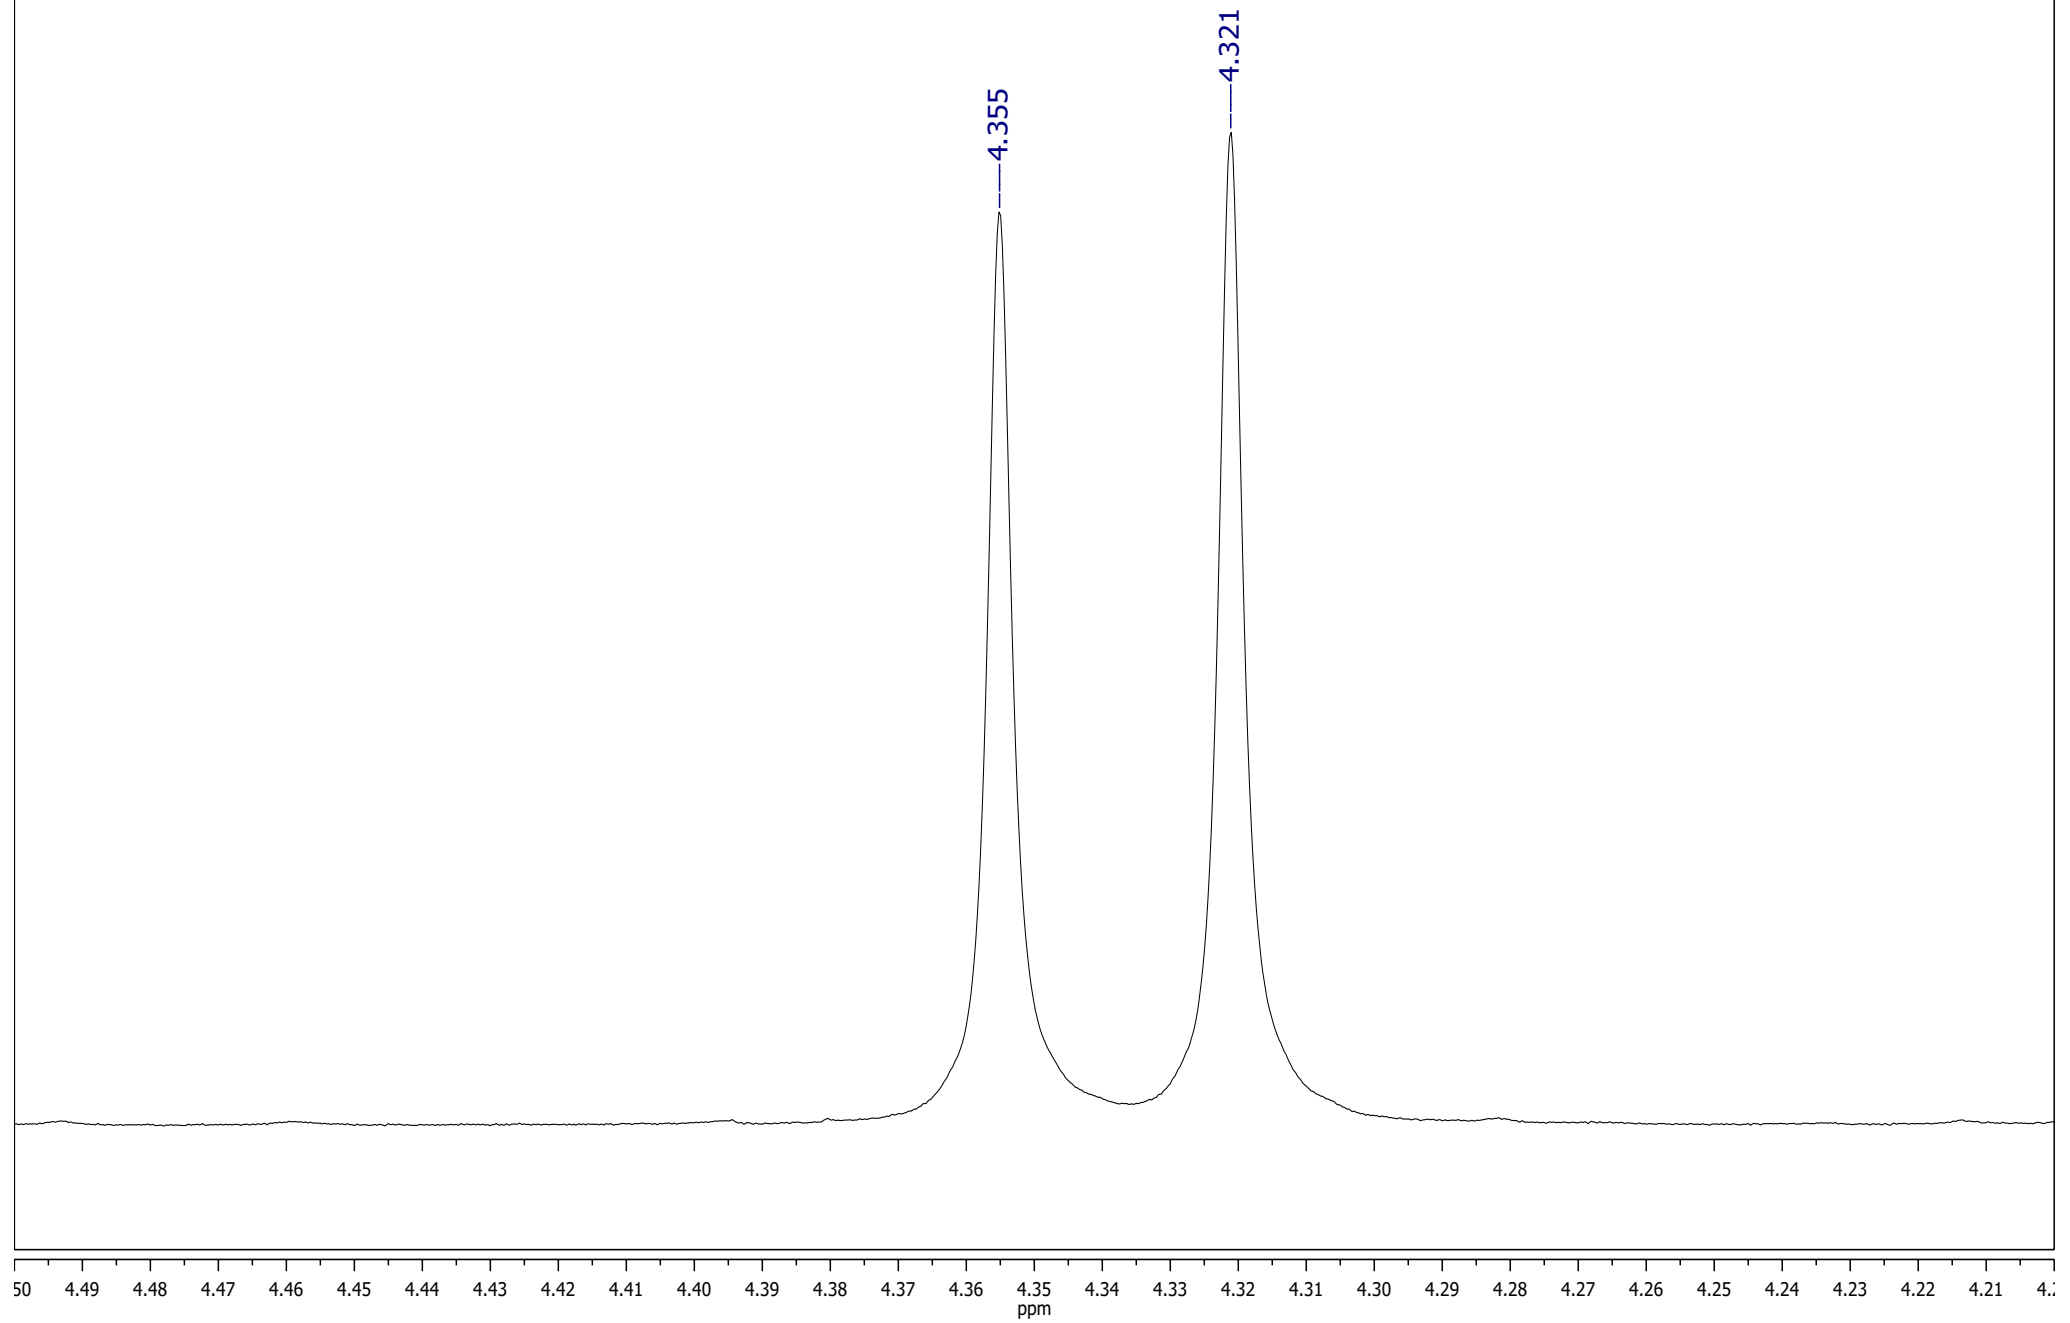

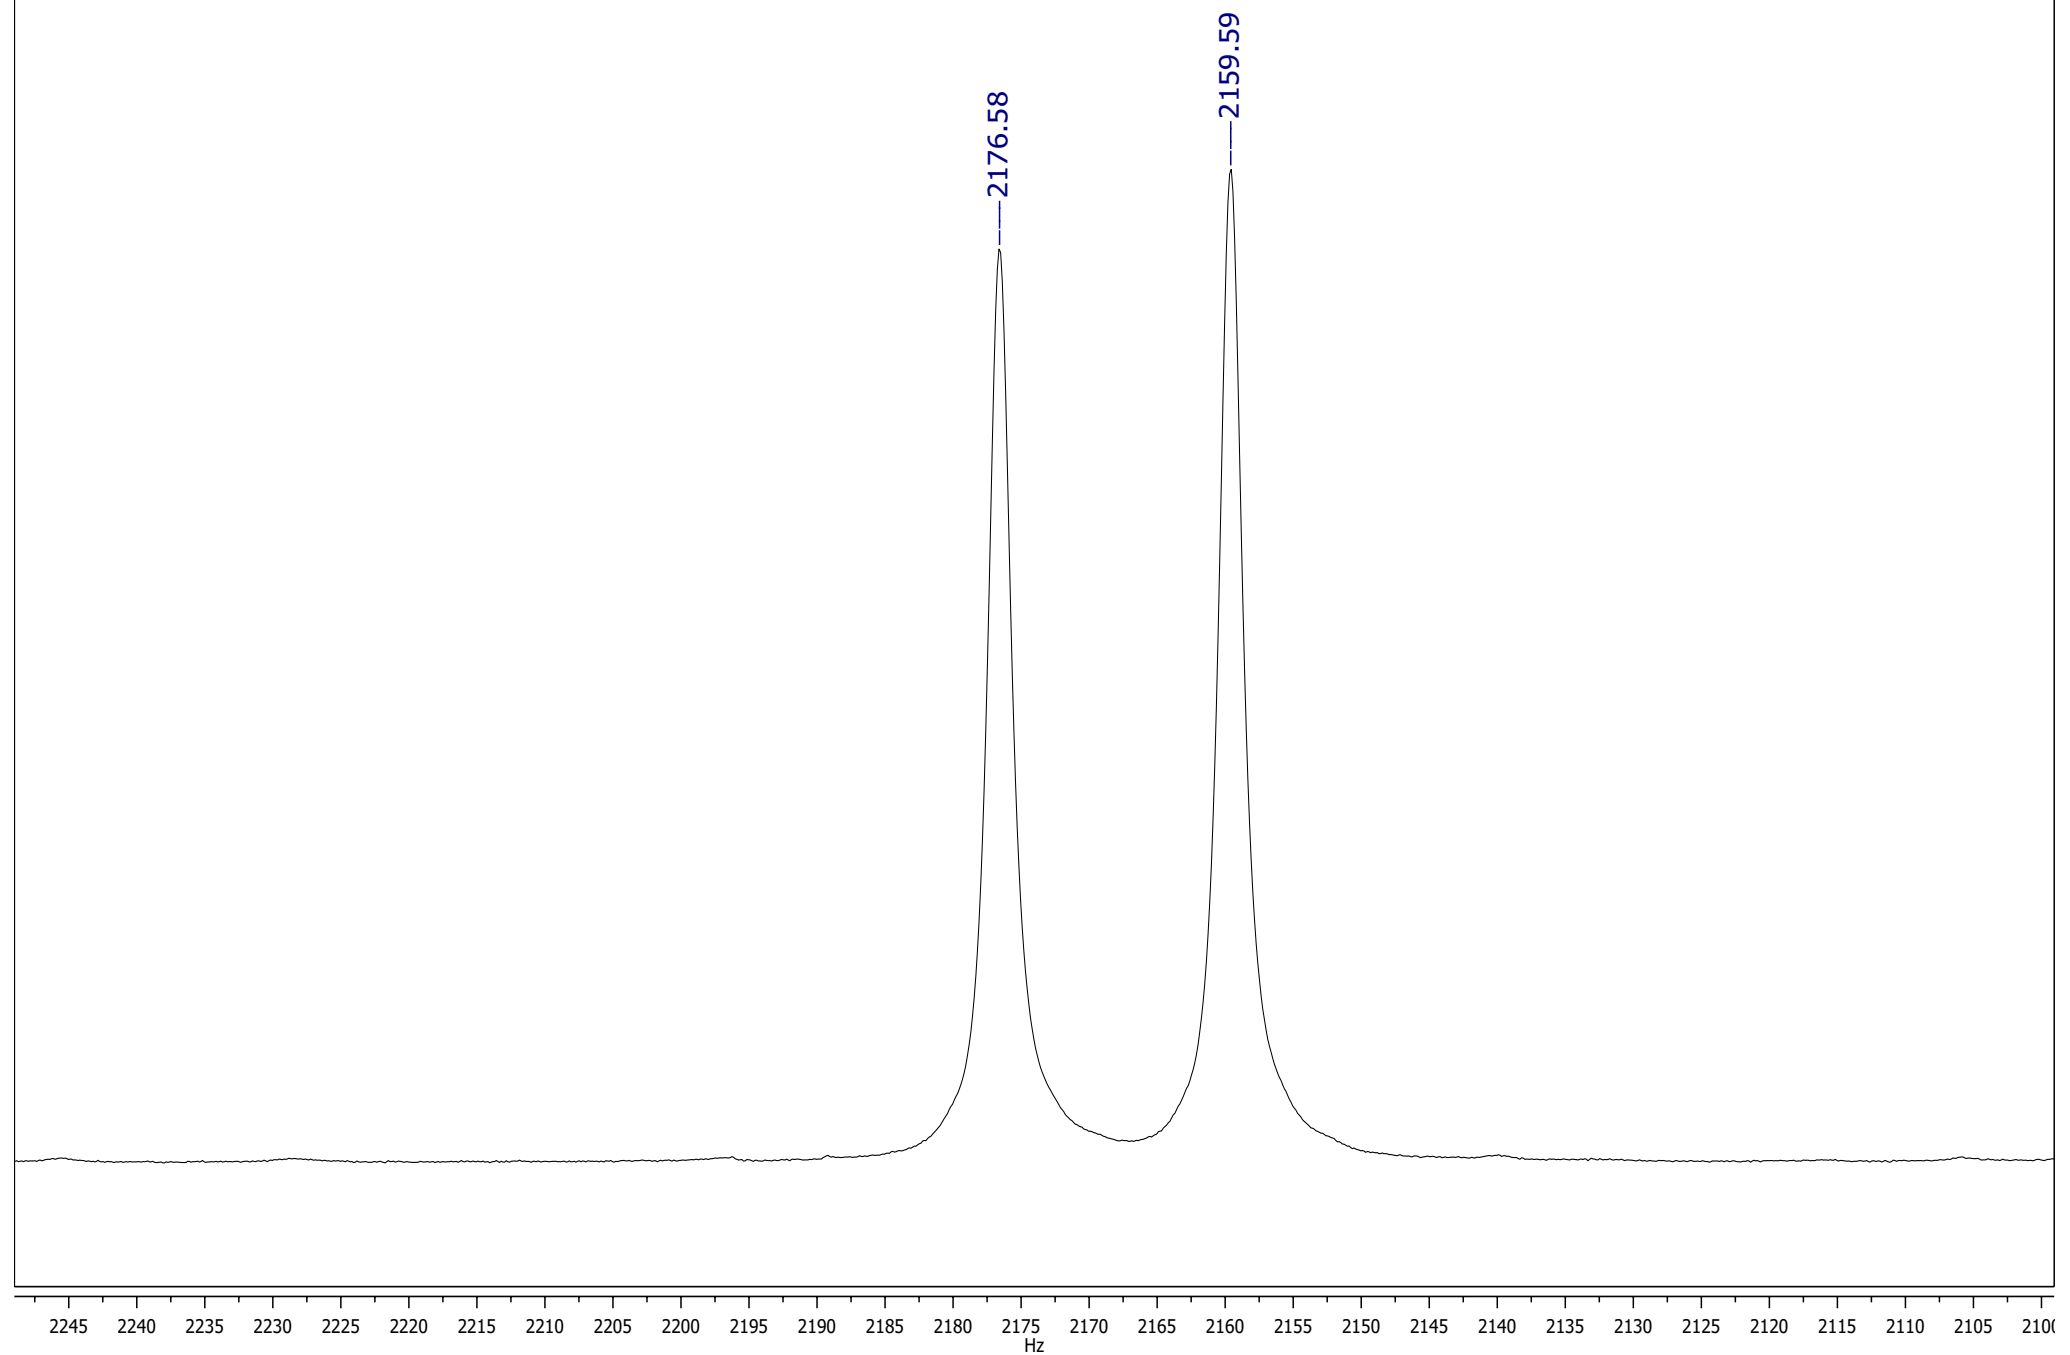

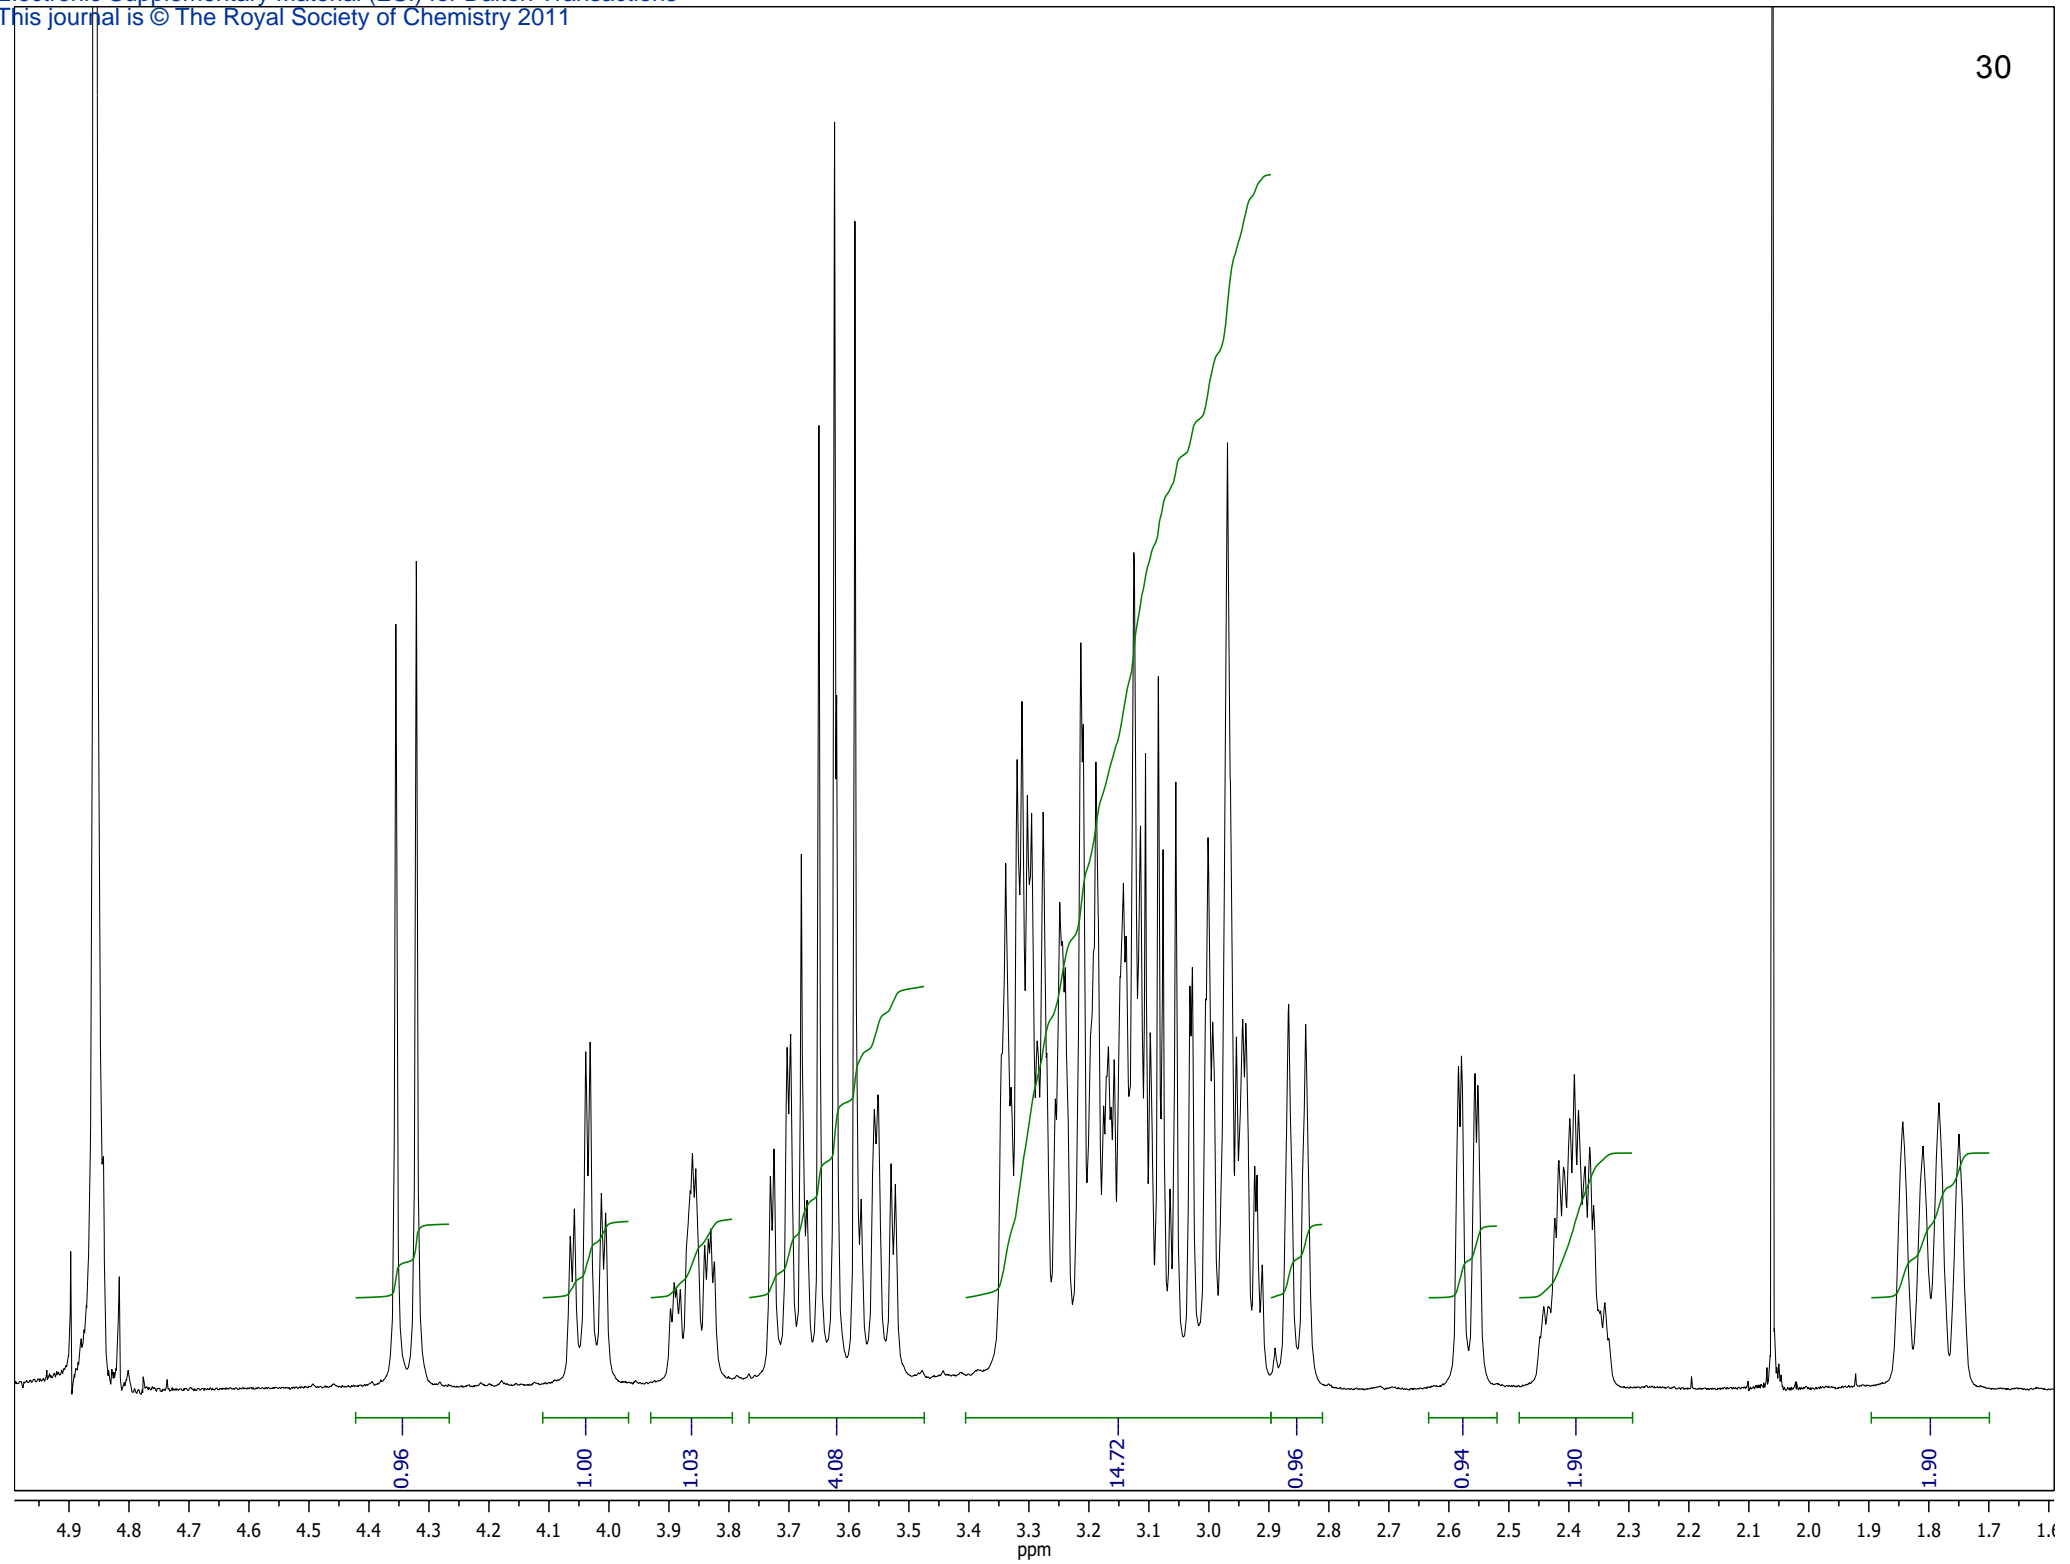

|    |                        |                     |
|----|------------------------|---------------------|
| 1  | Comment                | RF-CB-TE1A1P        |
| 2  | Origin                 | Varian              |
| 3  | Solvent                | D2O                 |
| 4  | Number of Scans        | 16                  |
| 5  | Acquisition Time       | 3.0000              |
| 6  | Acquisition Date       | 2011-01-24T15:29:41 |
| 7  | Spectrometer Frequency | 499.77707           |
| 8  | Spectral Width         | 7992.0              |
| 9  | Lowest Frequency       | -1396.6             |
| 10 | Nucleus                | $^1\text{H}$        |
| 11 | Acquired Size          | 23976               |
| 12 | Spectral Size          | 65536               |

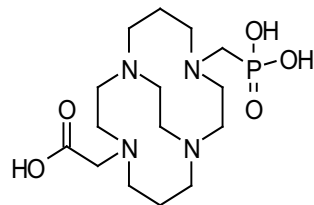

D<sub>2</sub>O, 499.78 MHz, internal reference  
with MeCN set at  $\delta$  2.06

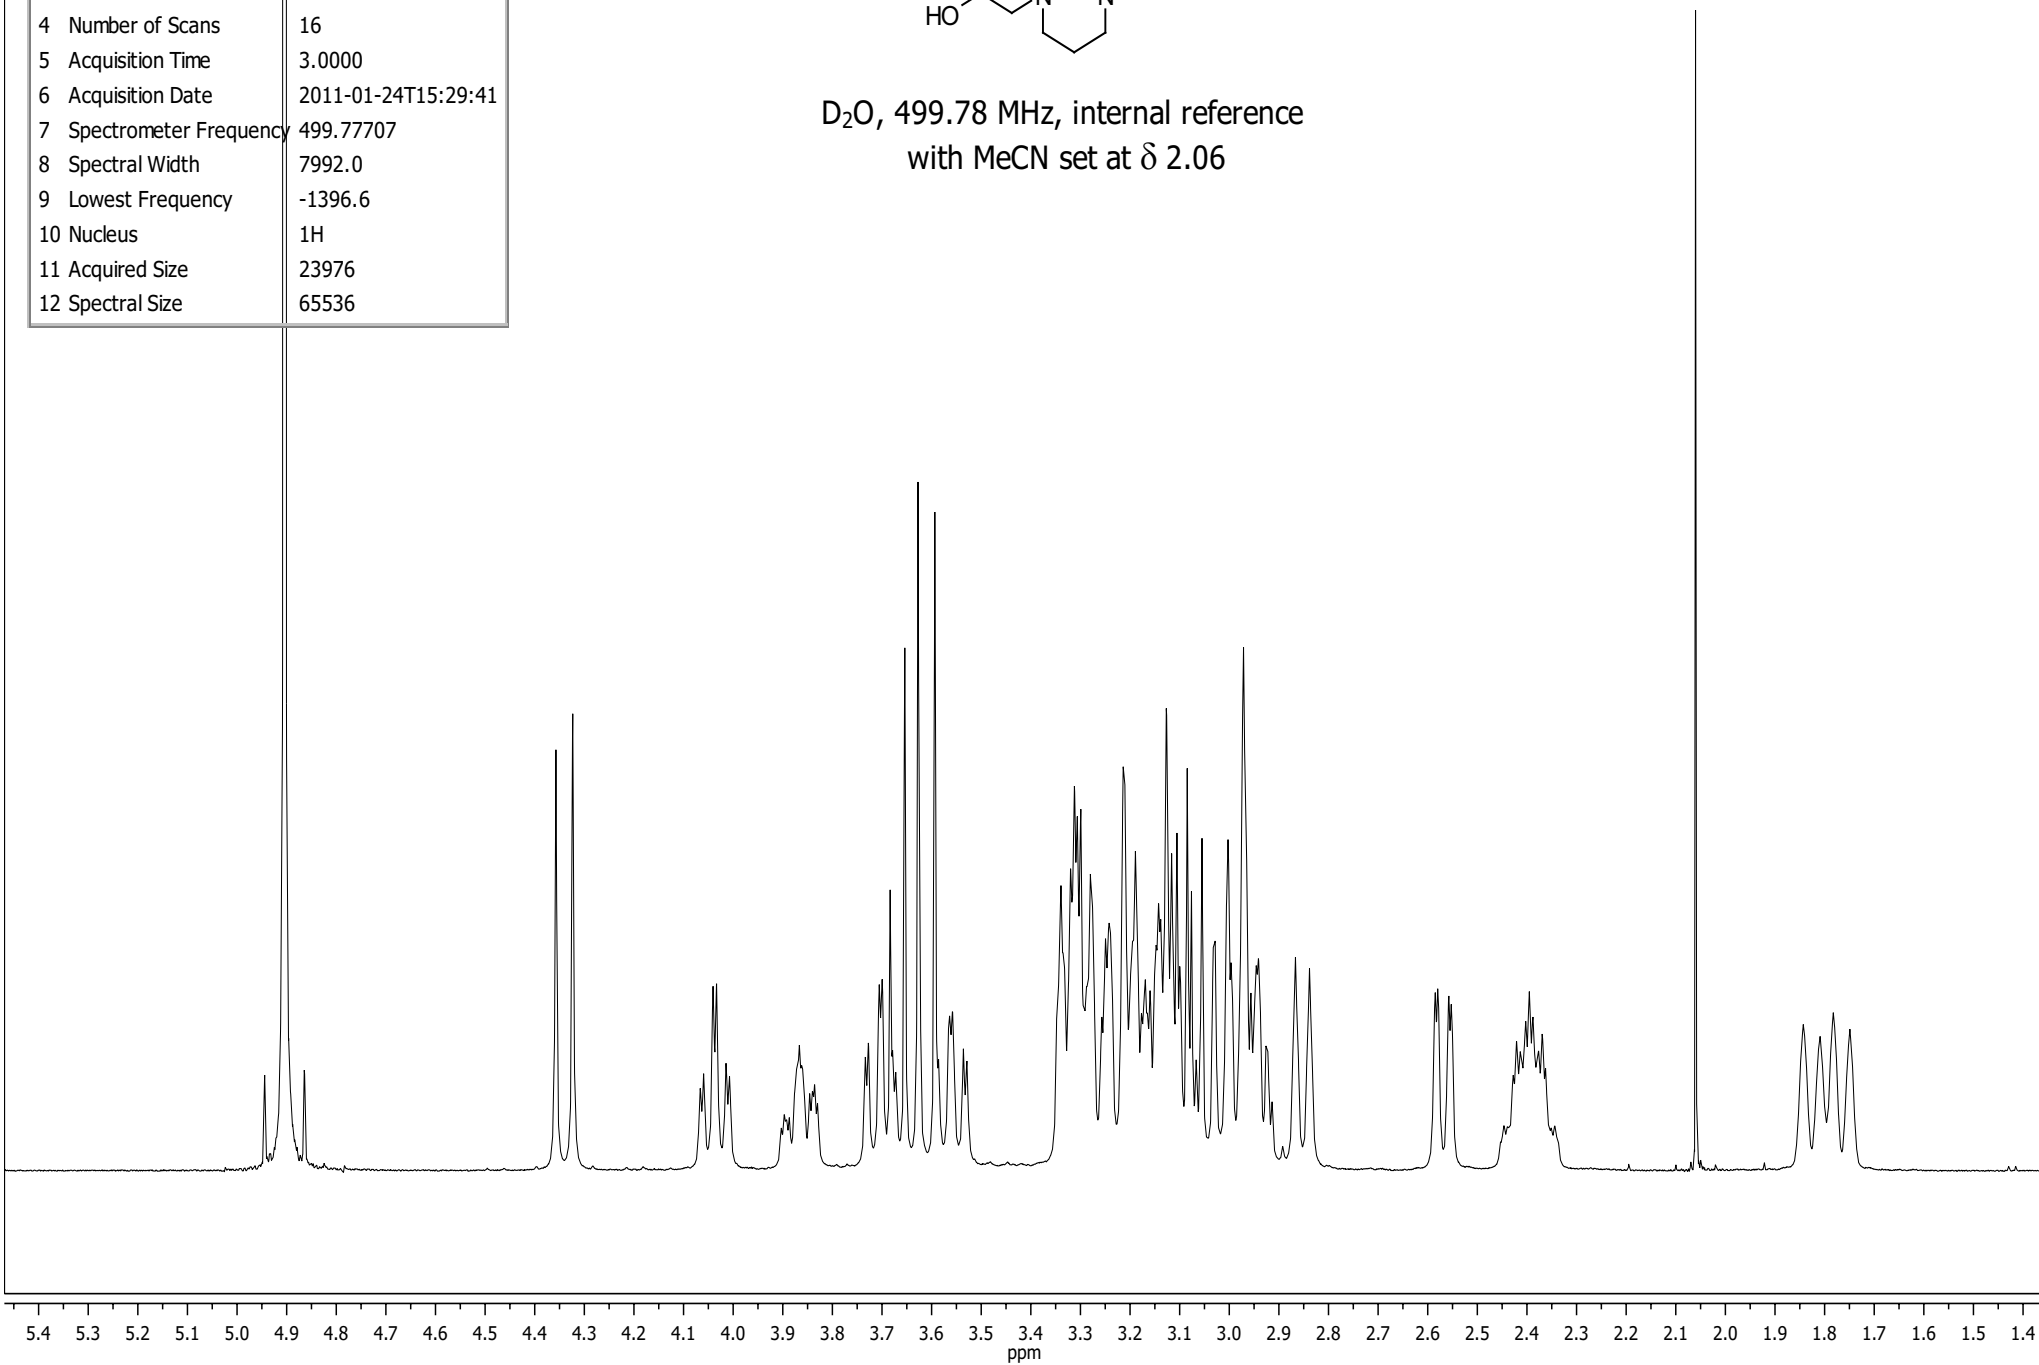

(See previous page for details of 1D proton spectrum.)

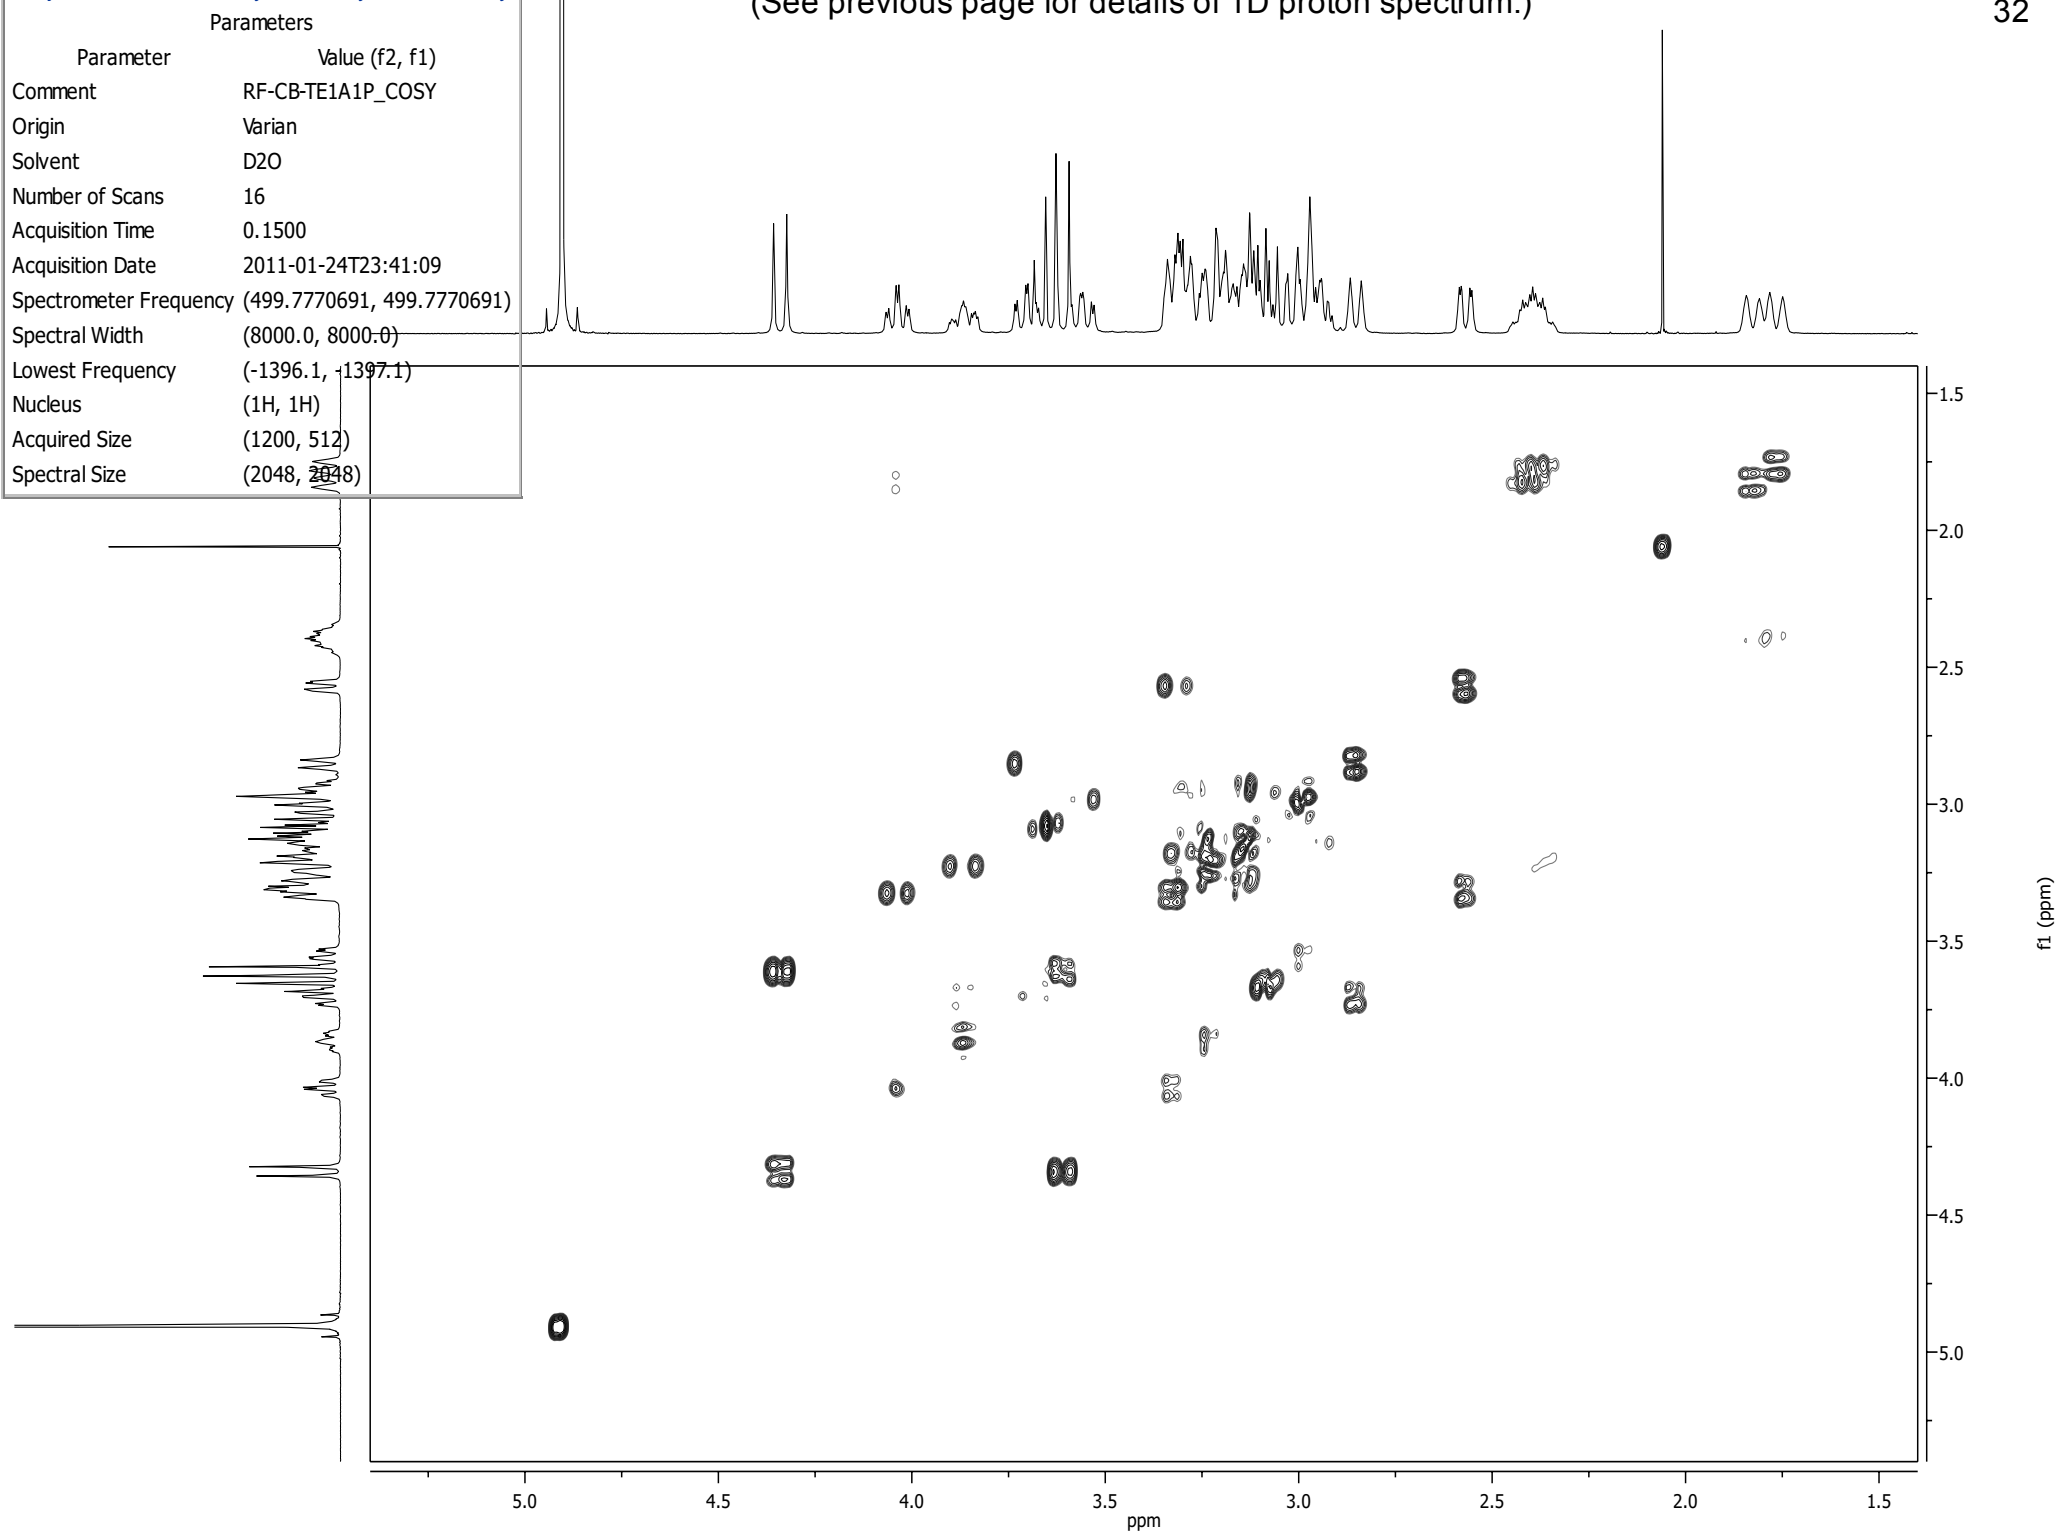

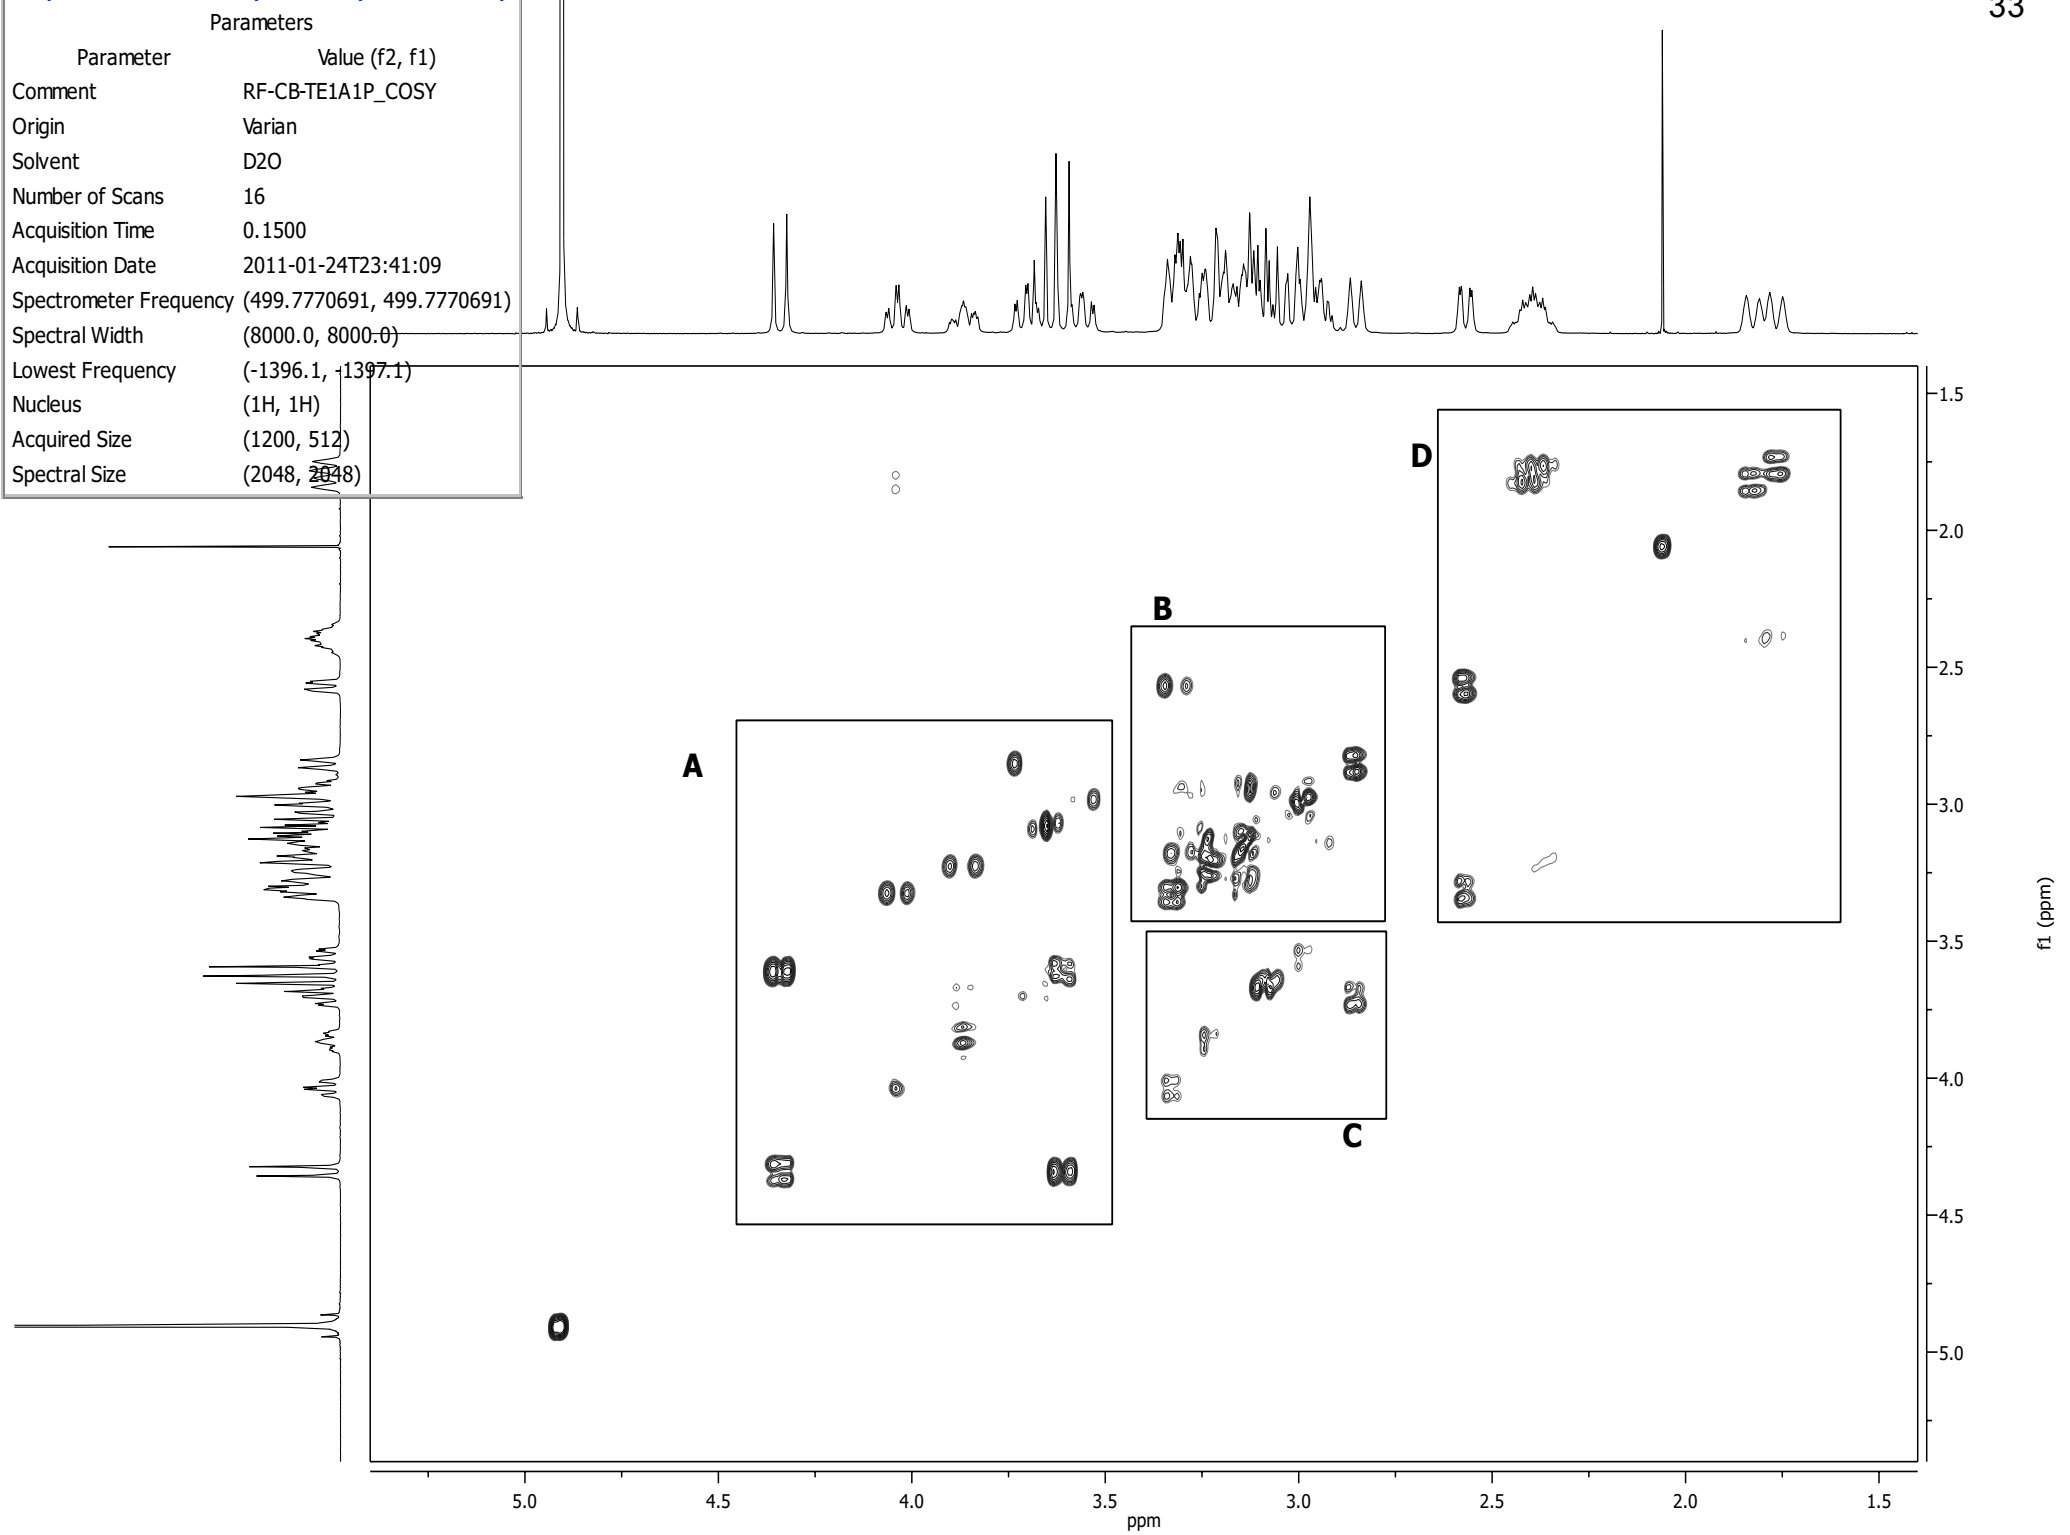

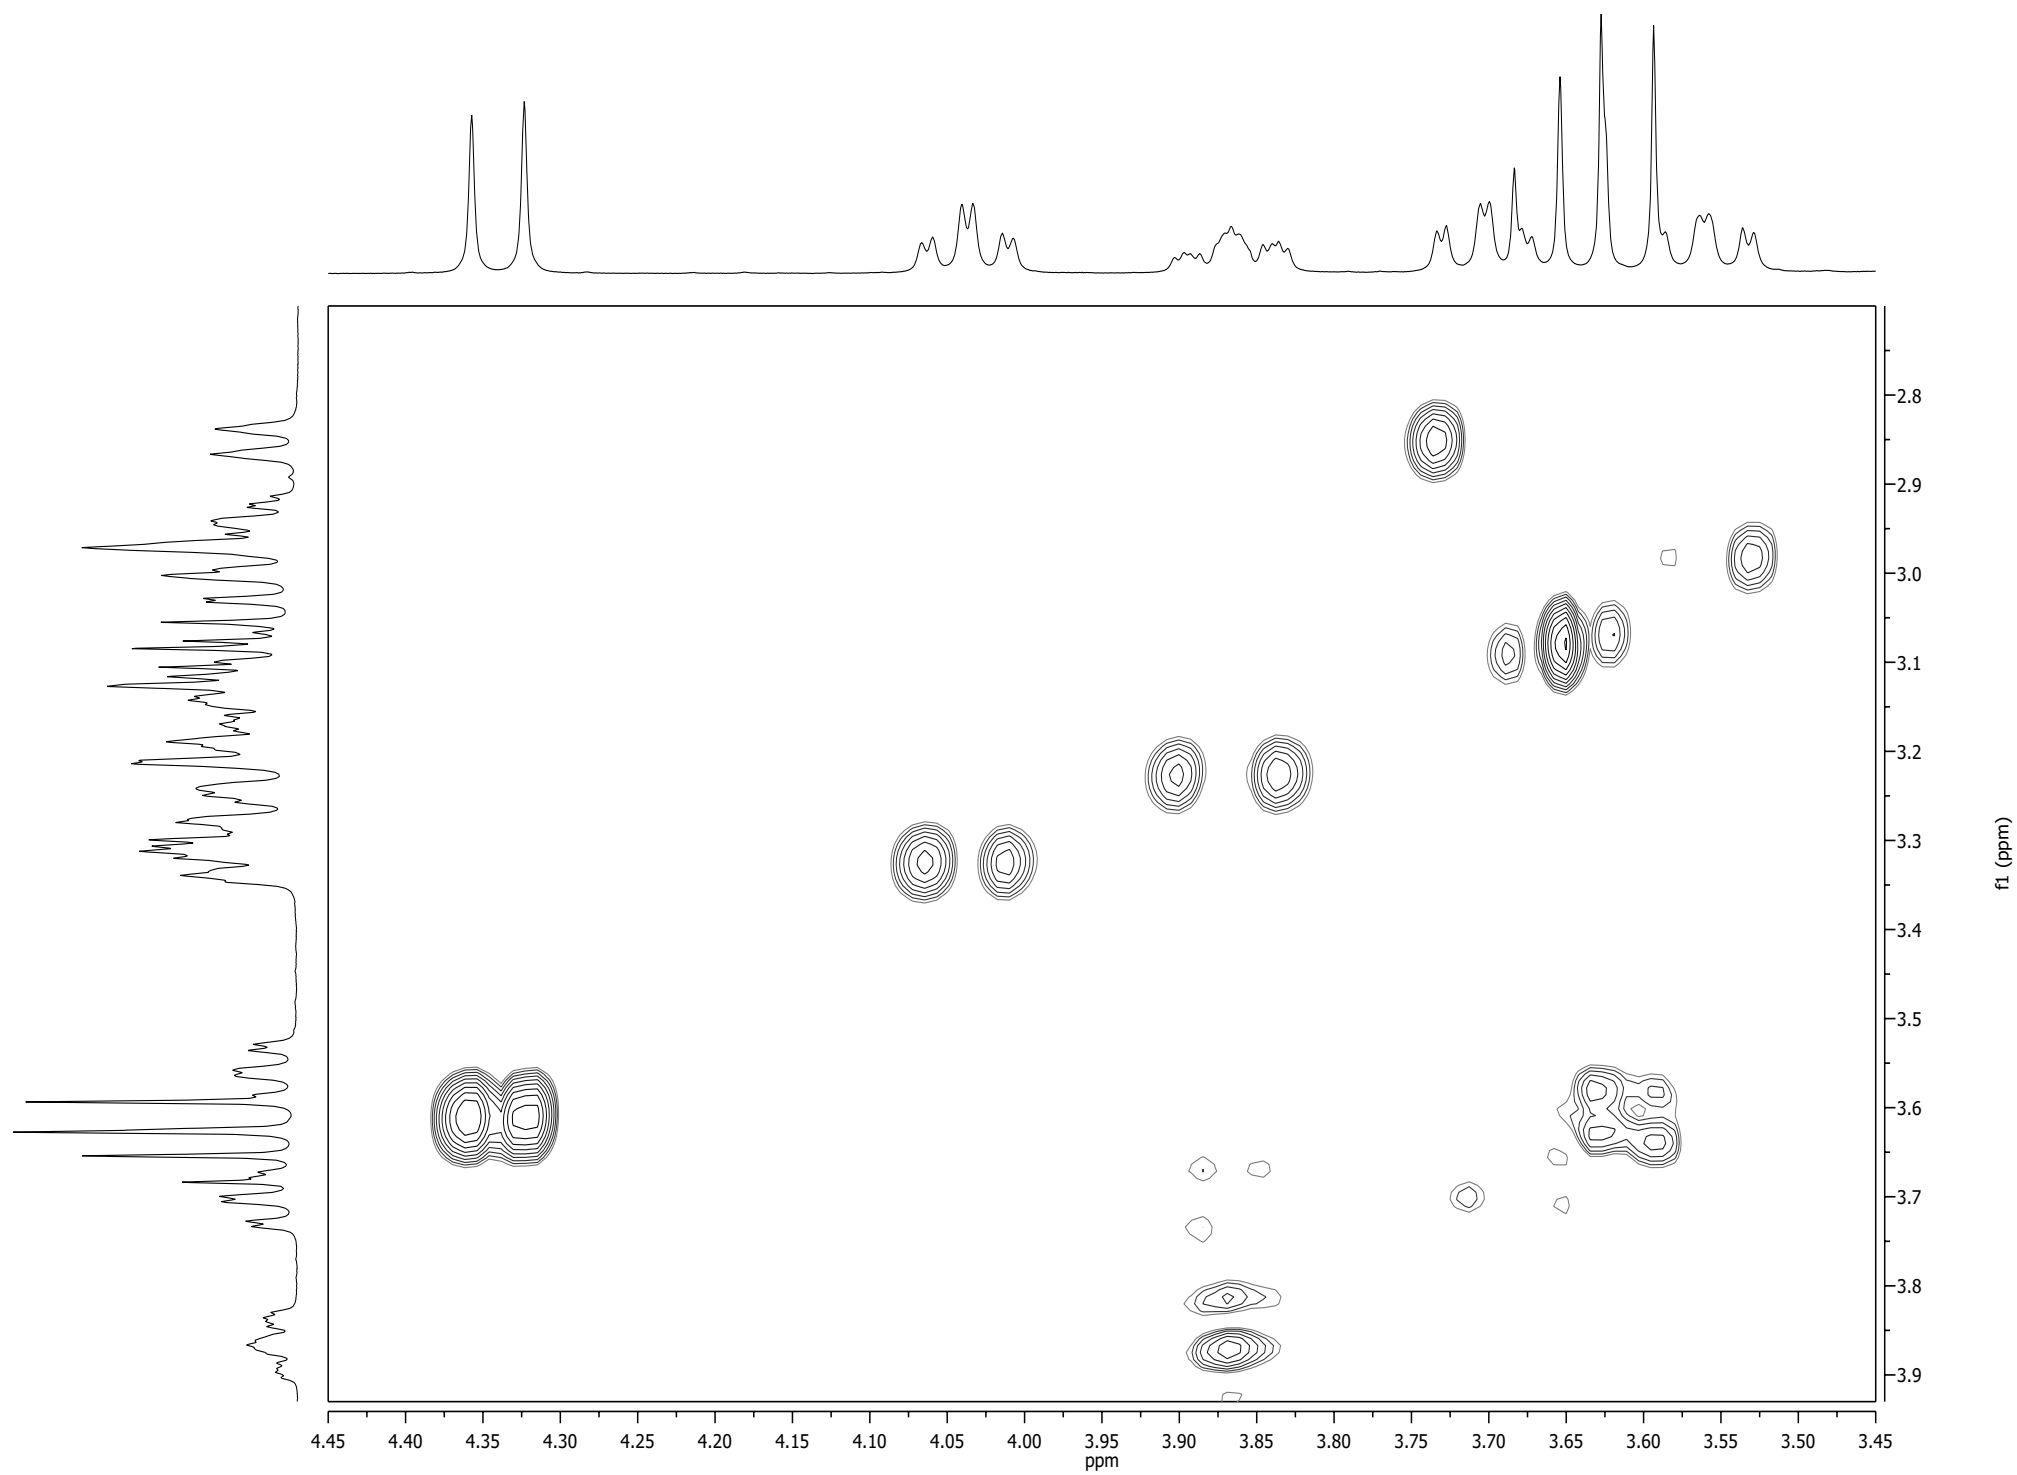

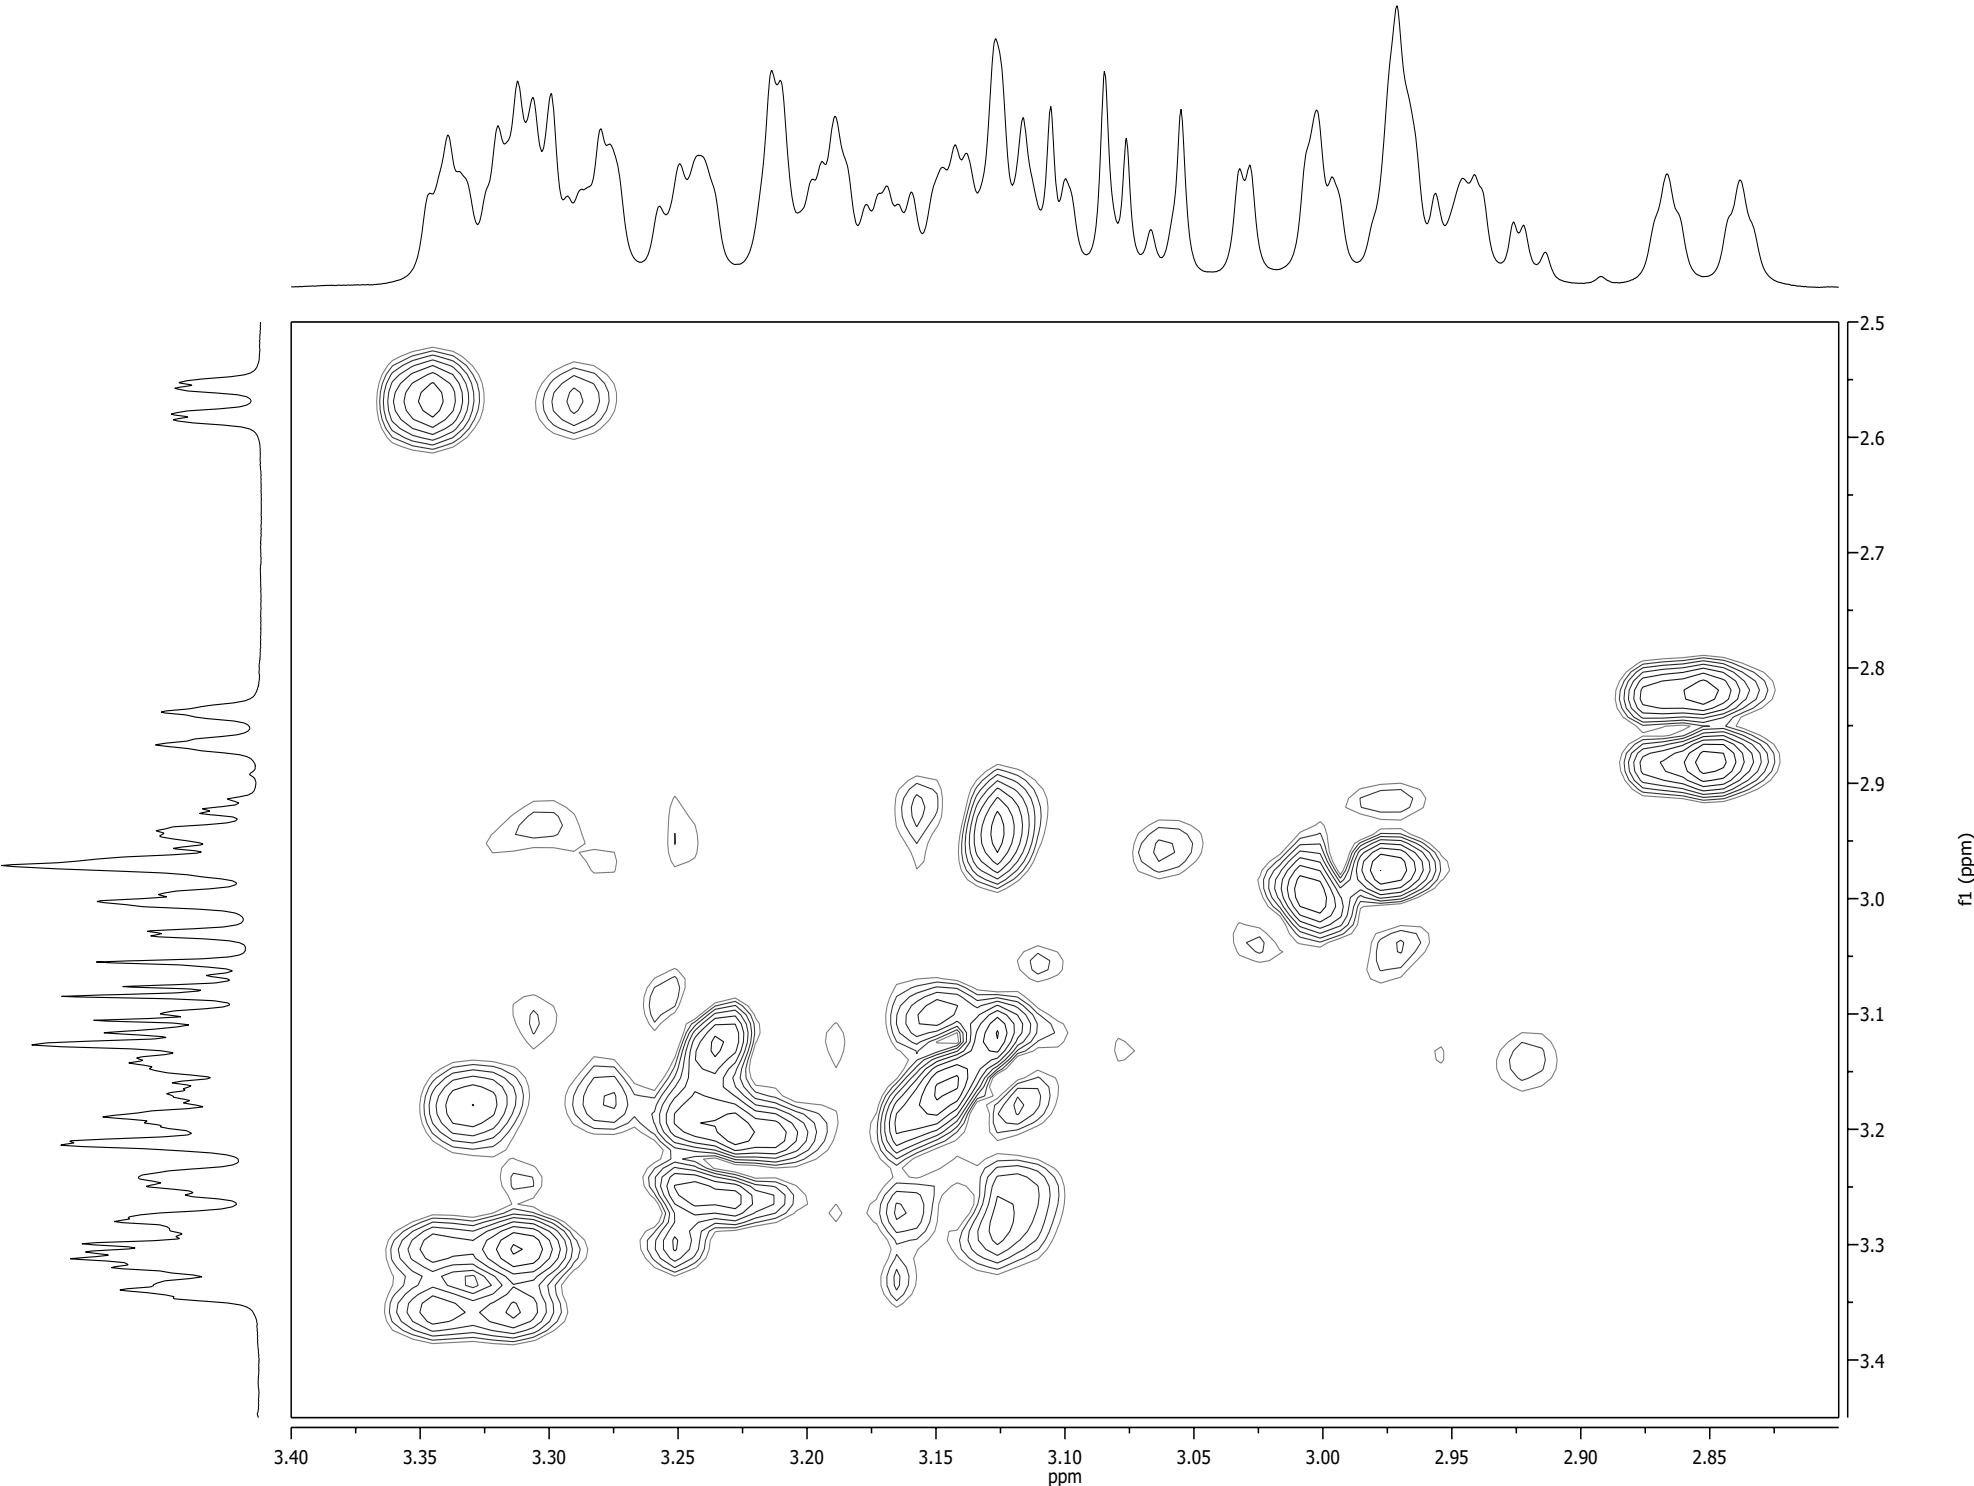

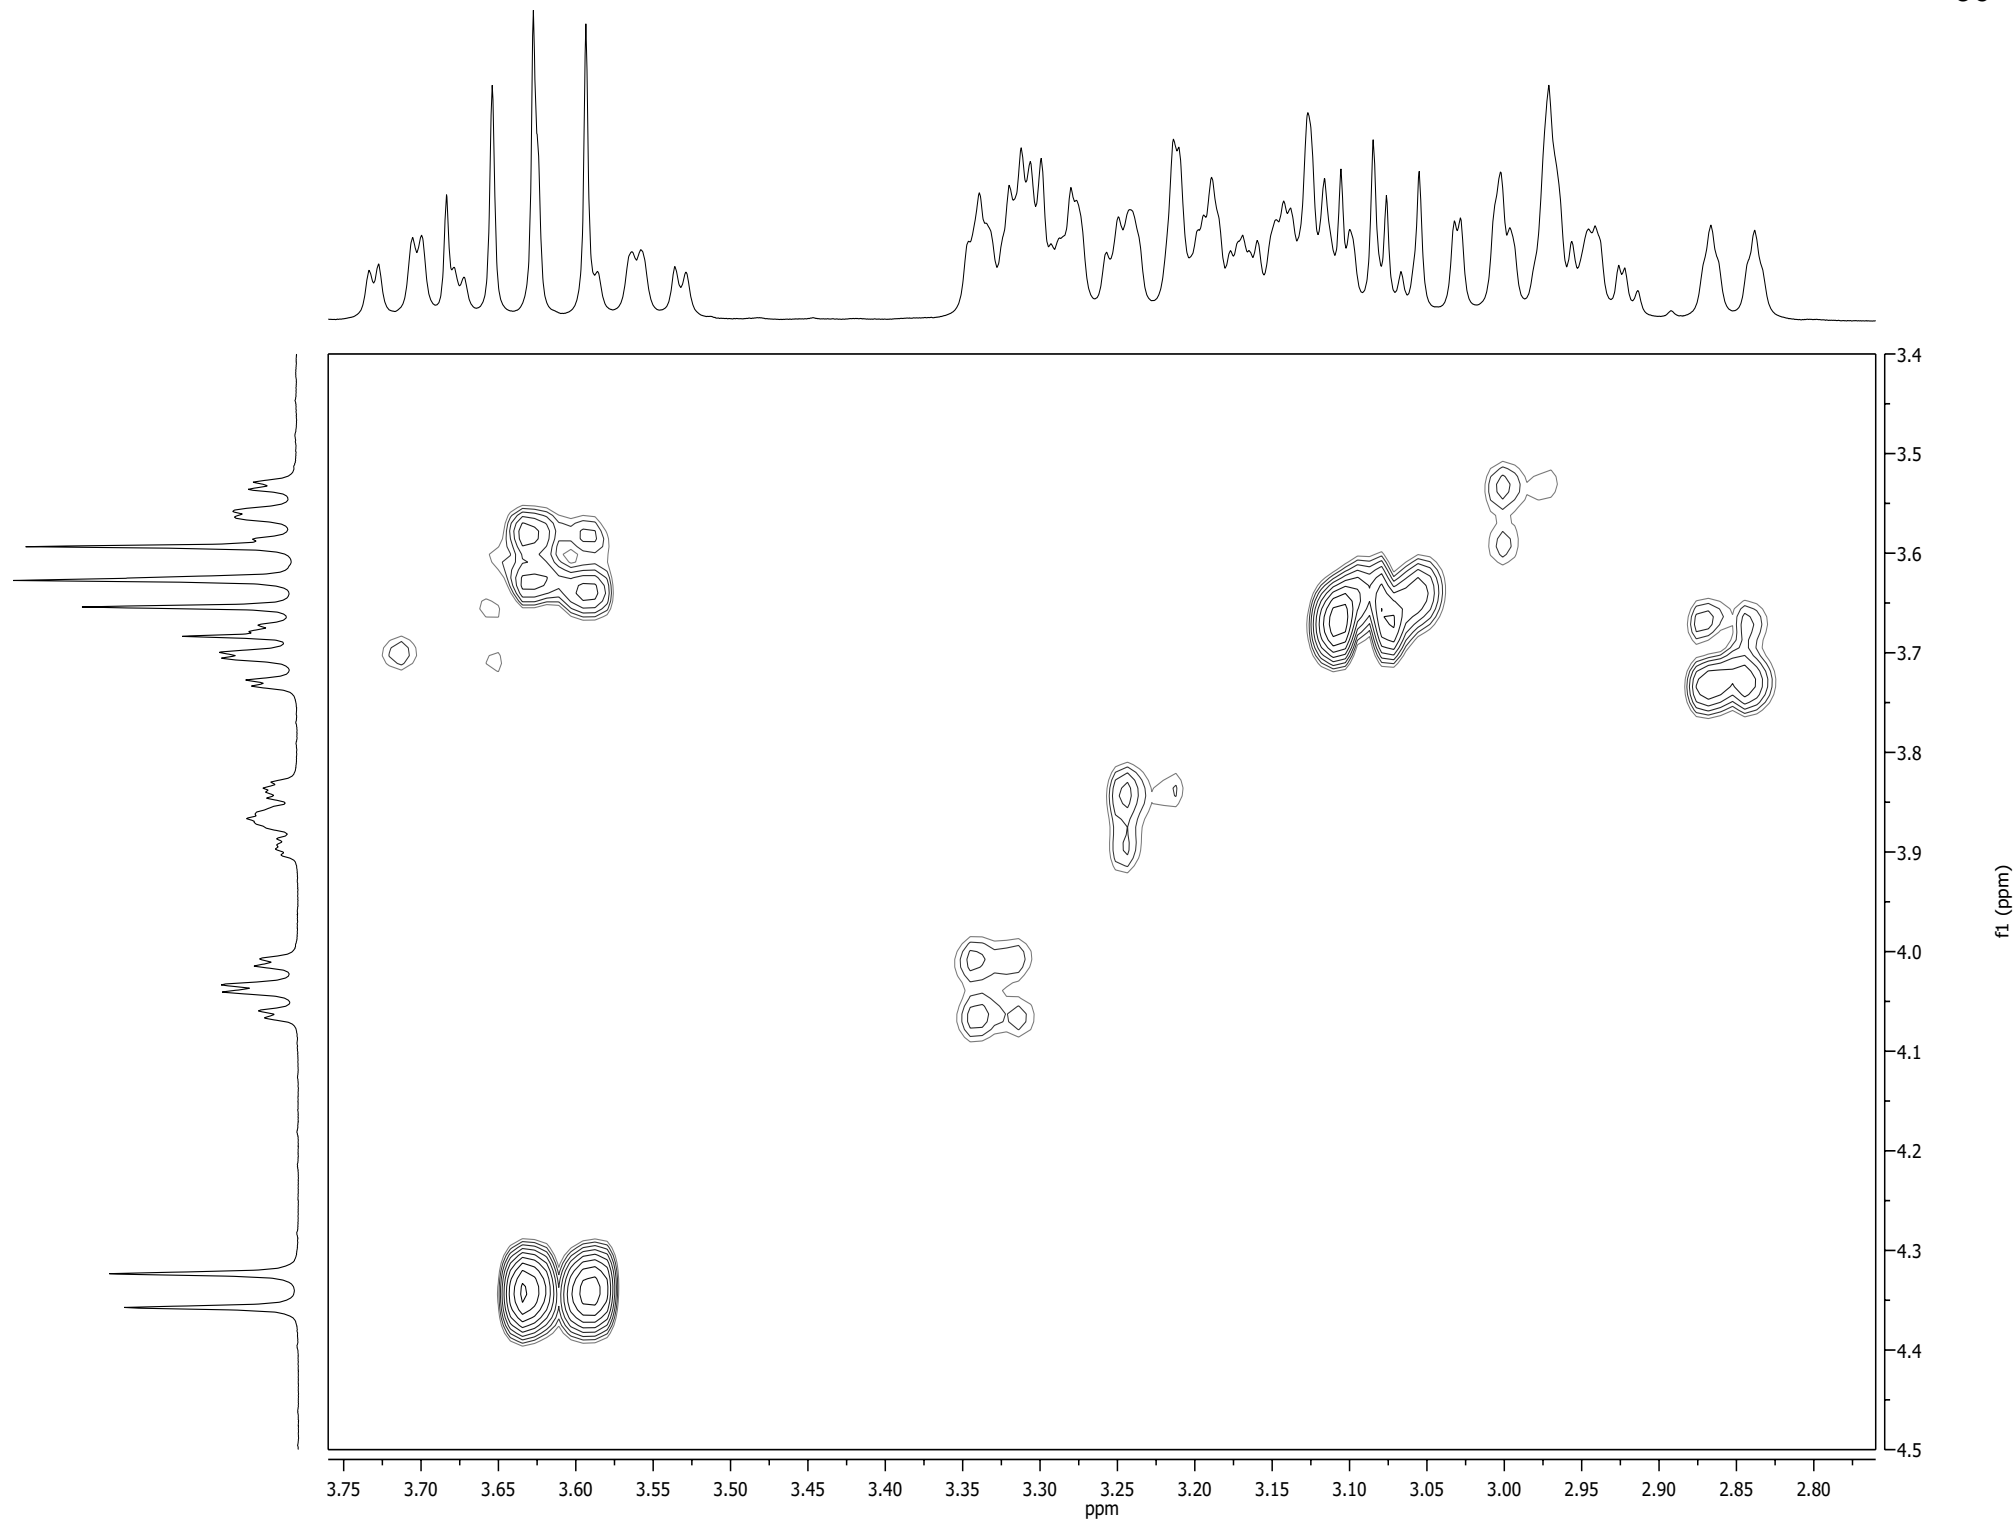

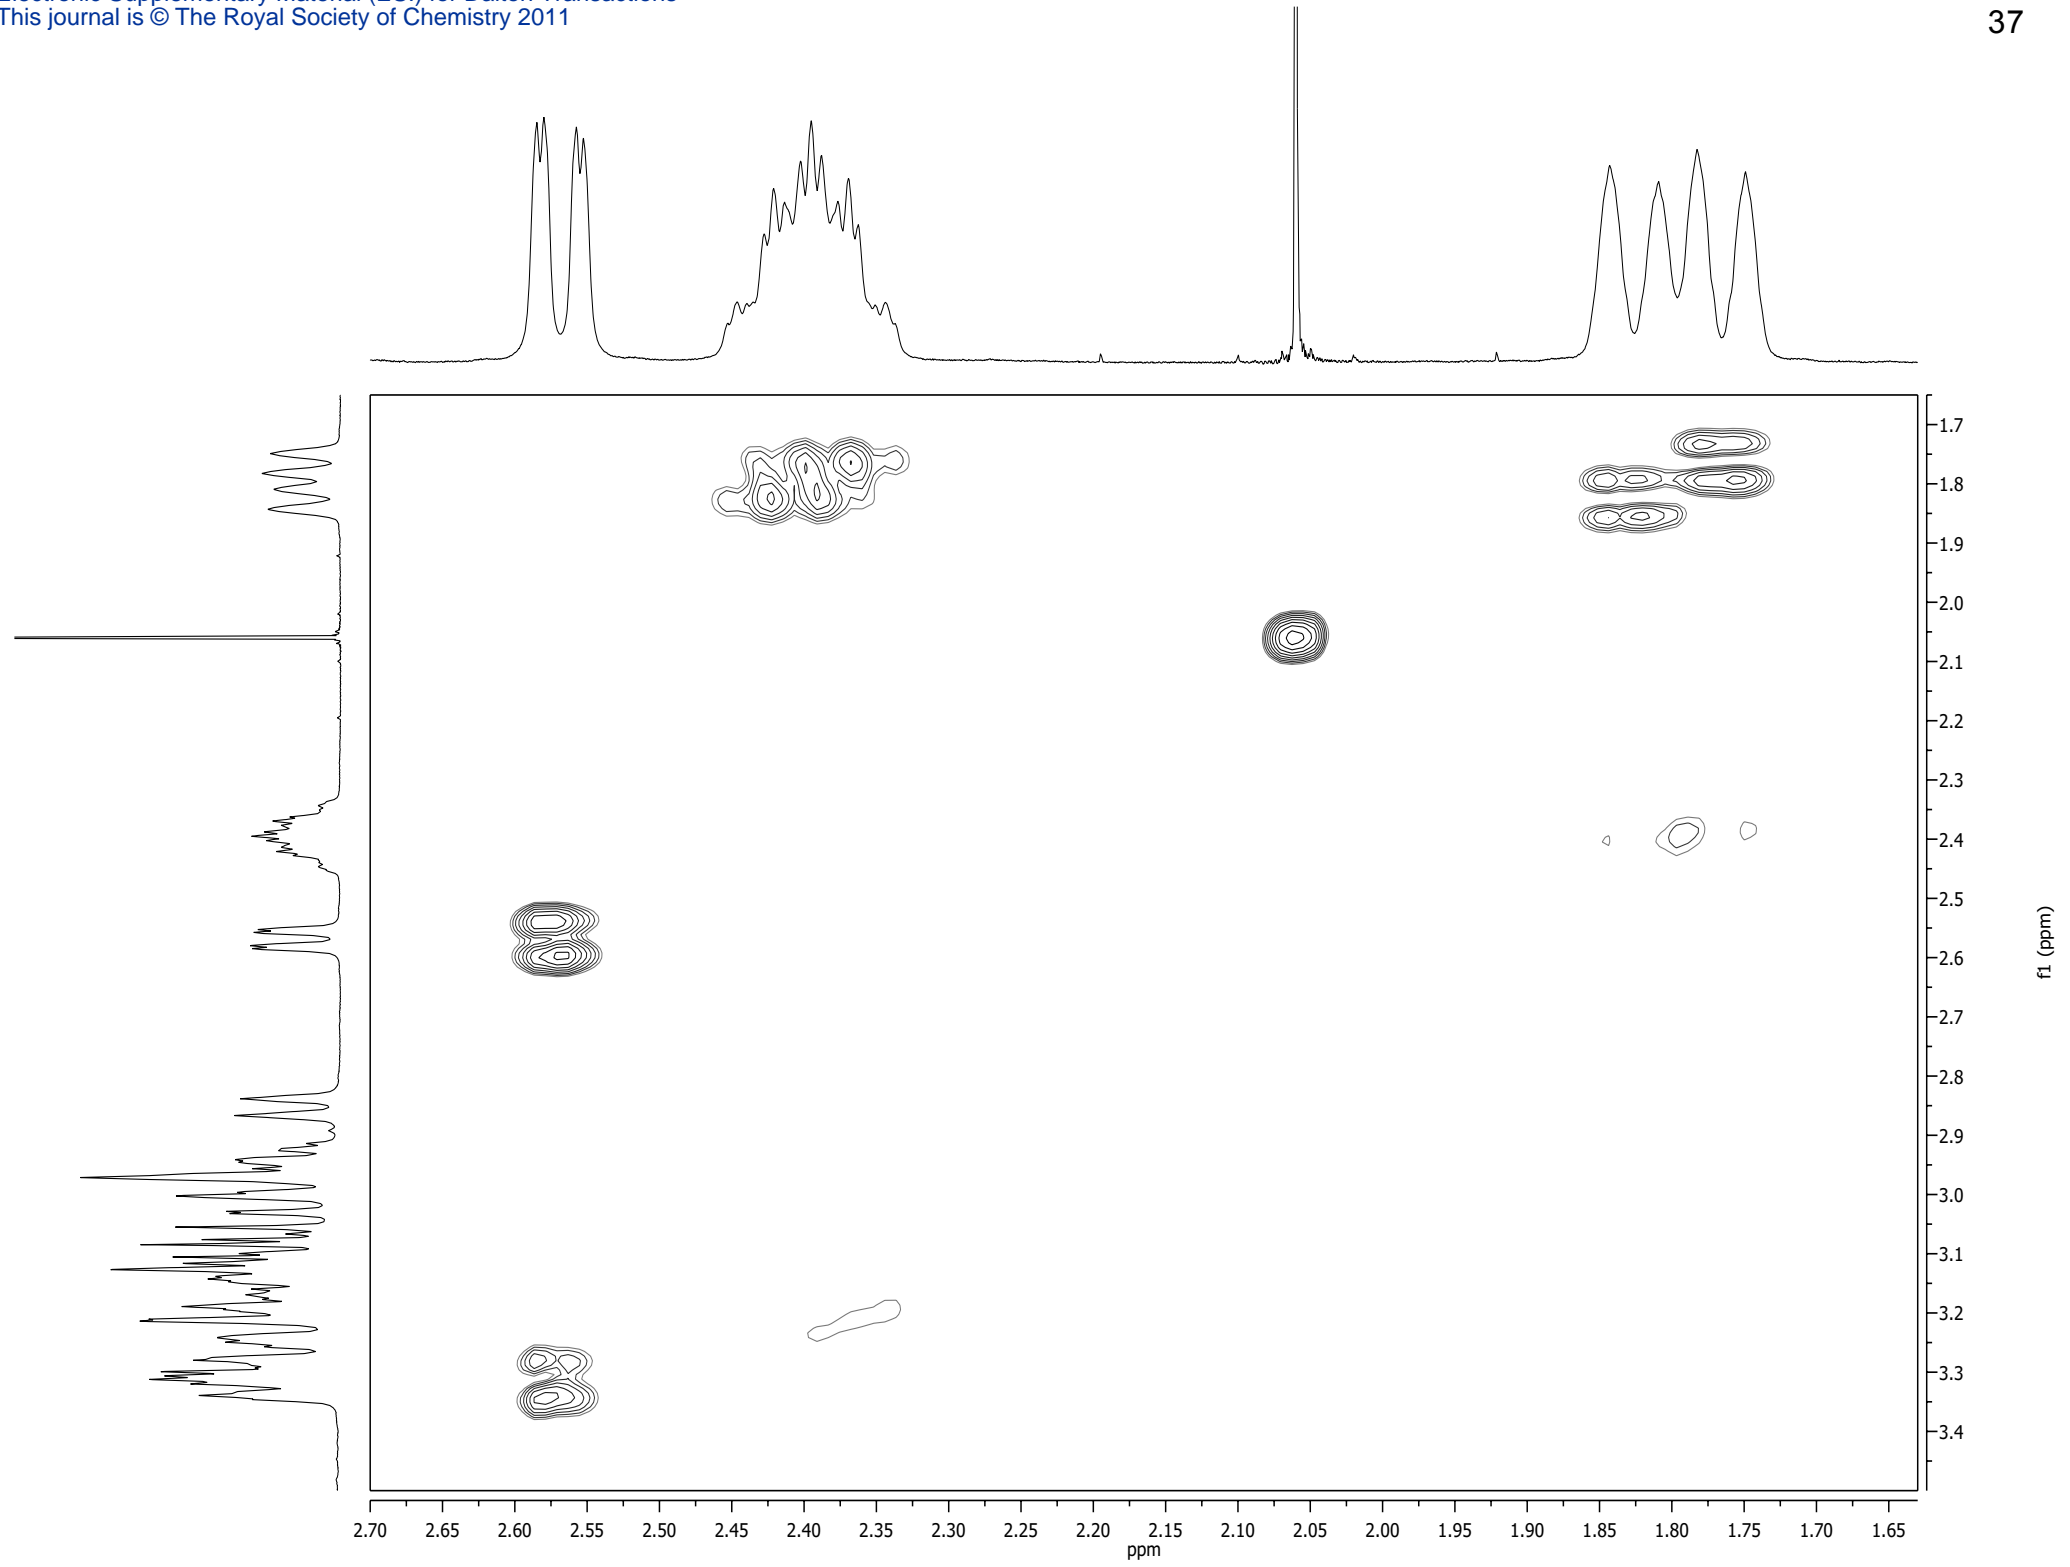

|    |                        |                         |
|----|------------------------|-------------------------|
| 1  | Data File Name         | RF-CB-TE1A1P_13C_125MHz |
| 2  | Origin                 | Varian                  |
| 3  | Solvent                | D2O                     |
| 4  | Number of Scans        | 38000                   |
| 5  | Receiver Gain          | 40                      |
| 6  | Acquisition Time       | 1.0000                  |
| 7  | Acquisition Date       | 2011-01-22T08:03:16     |
| 8  | Spectrometer Frequency | 125.68036               |
| 9  | Spectral Width         | 31446.5                 |
| 10 | Lowest Frequency       | -3783.1                 |
| 11 | Nucleus                | <sup>13</sup> C         |
| 12 | Acquired Size          | 31447                   |
| 13 | Spectral Size          | 65536                   |

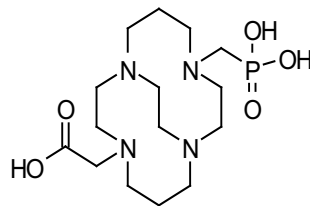

D<sub>2</sub>O, 125.68 MHz, internal reference  
with MeCN set at  $\delta$  1.47

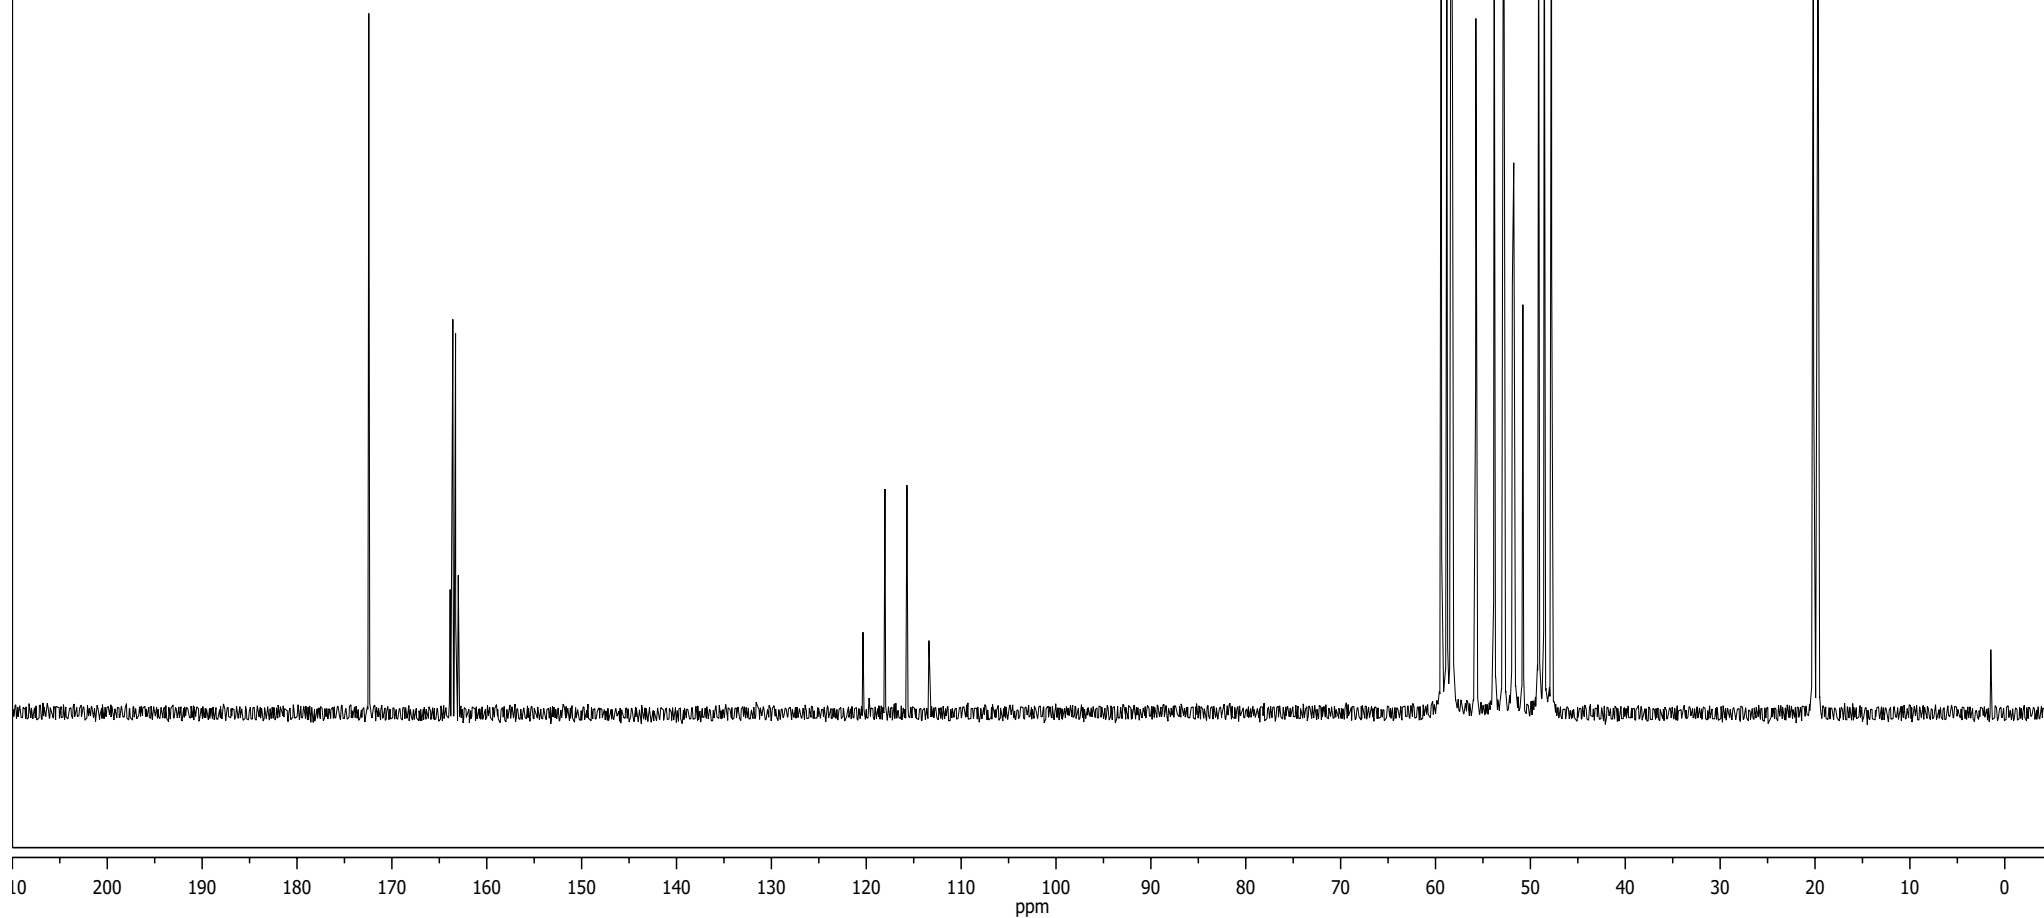

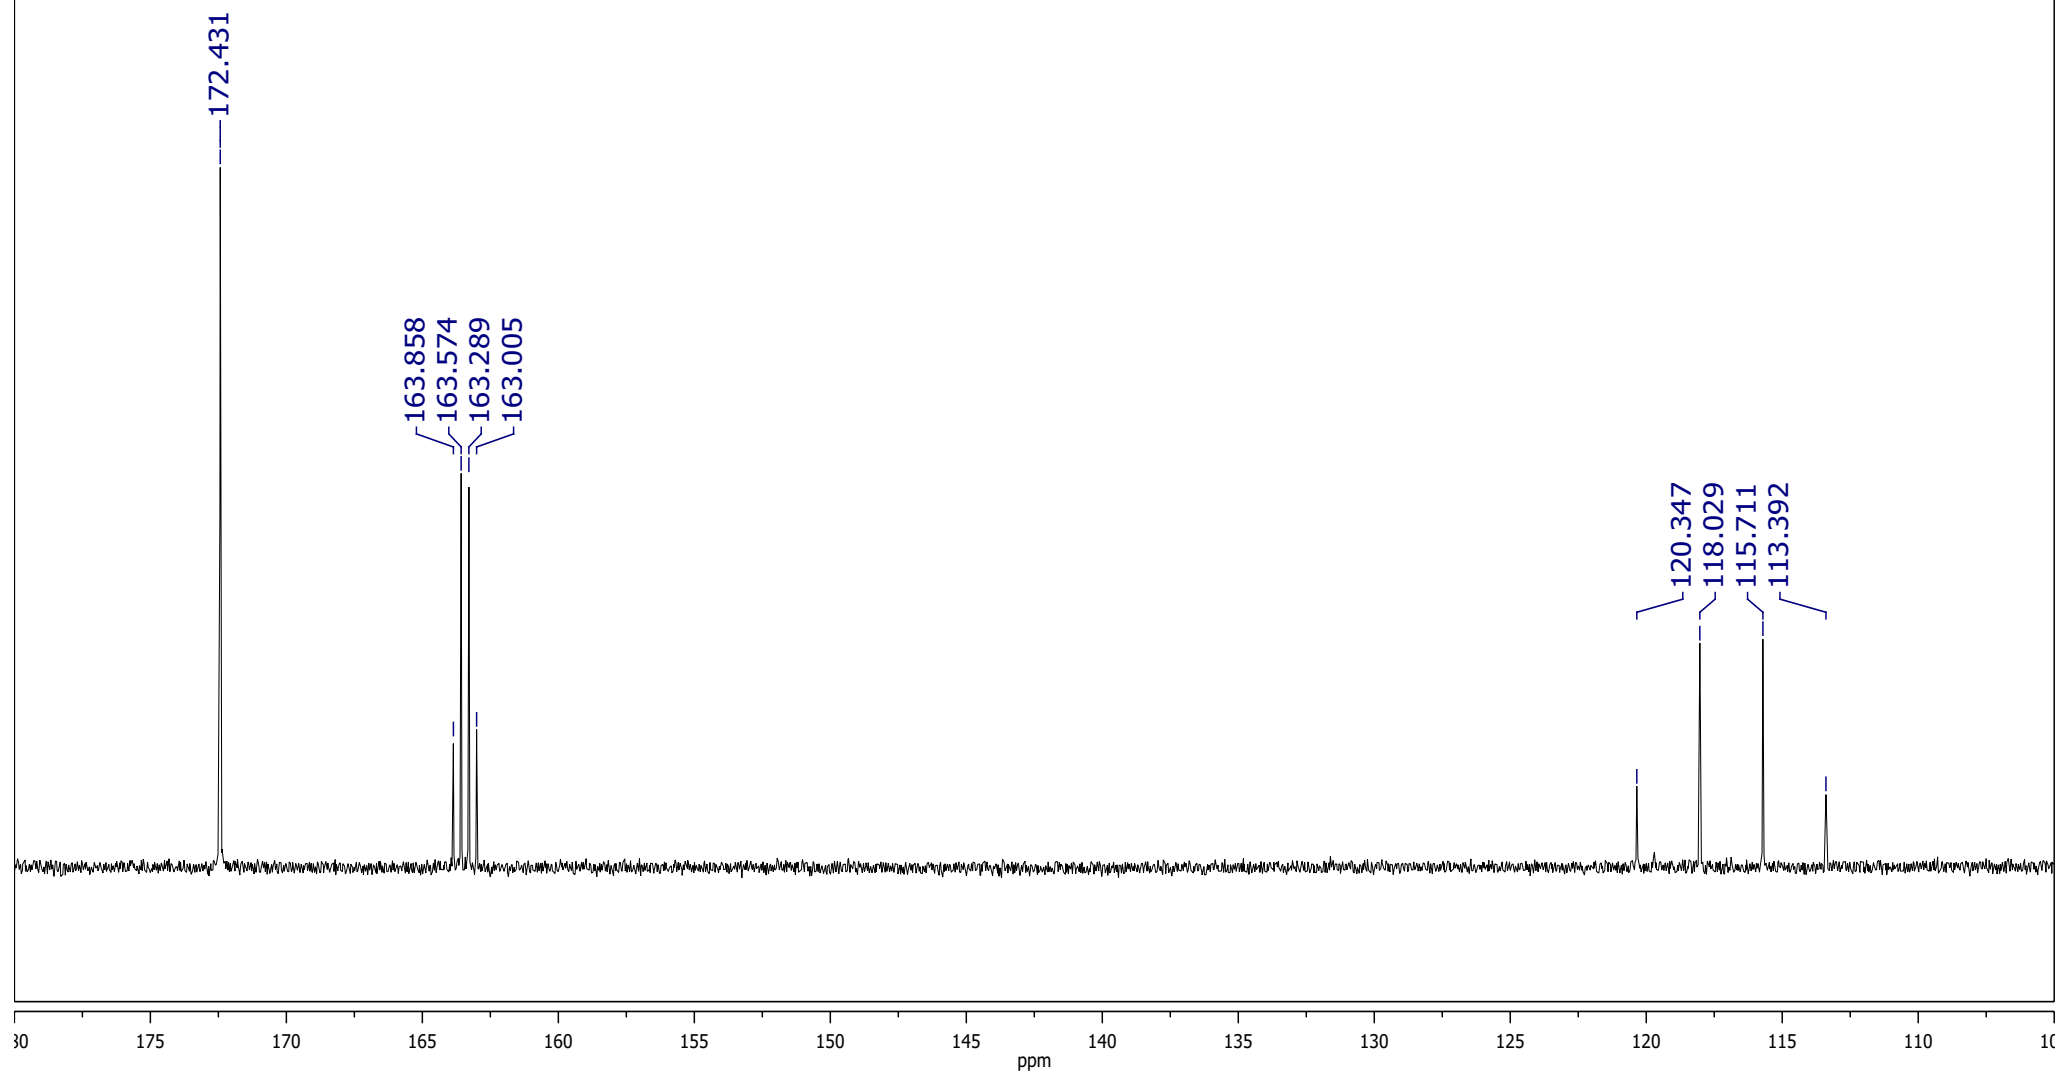

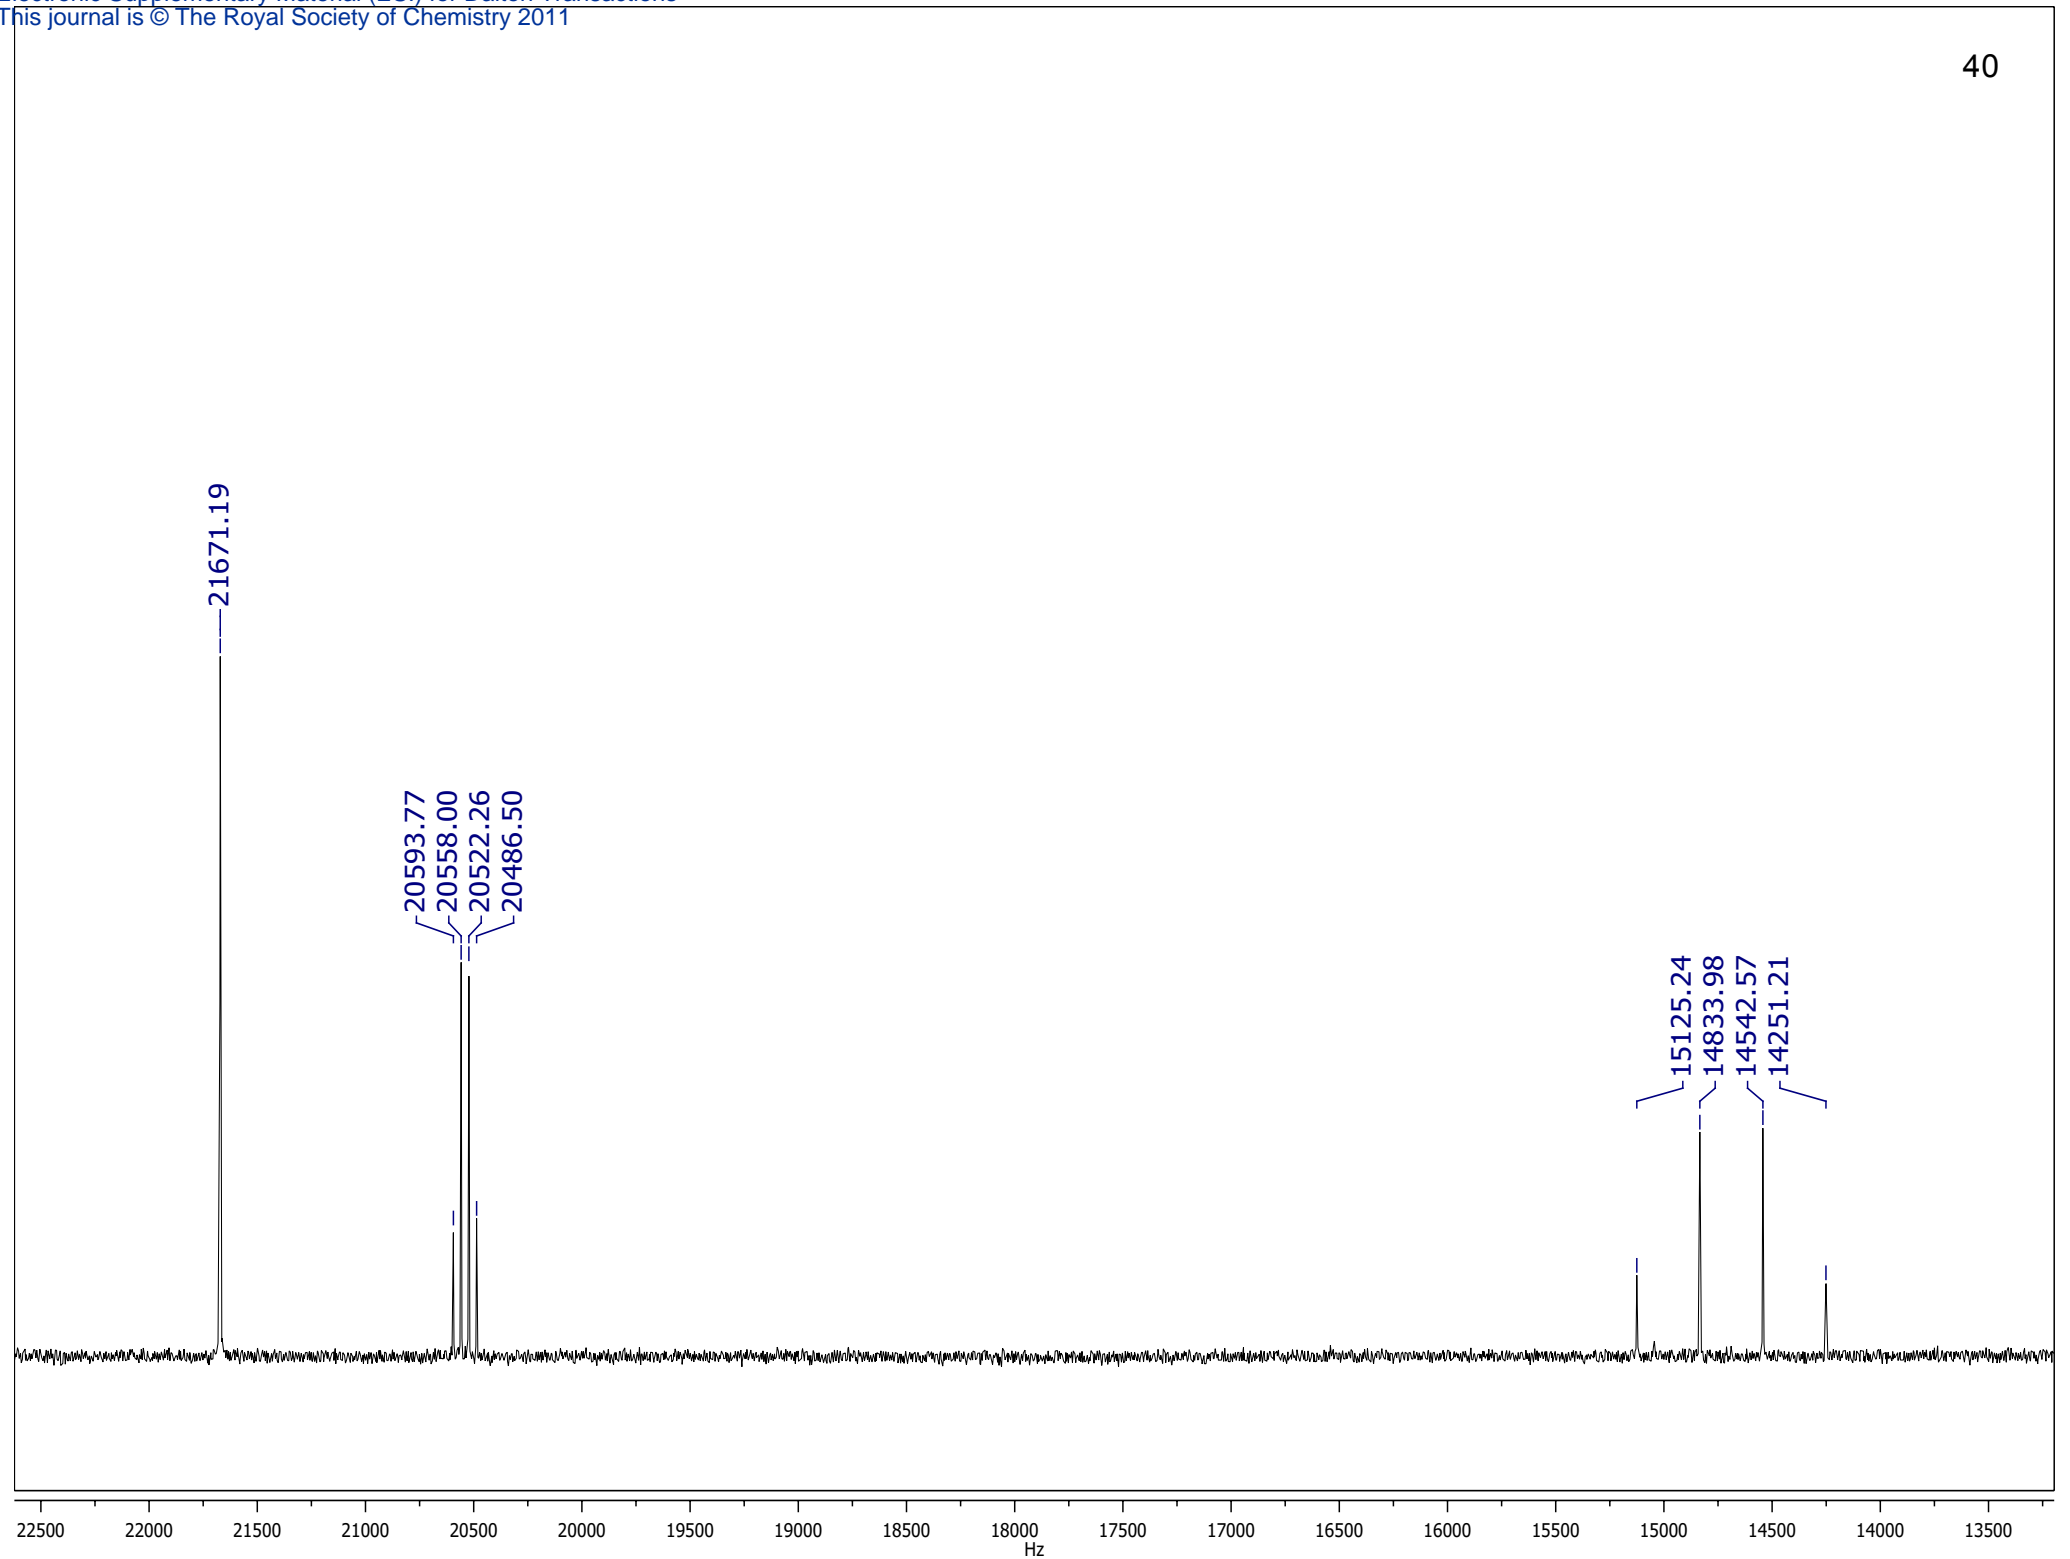

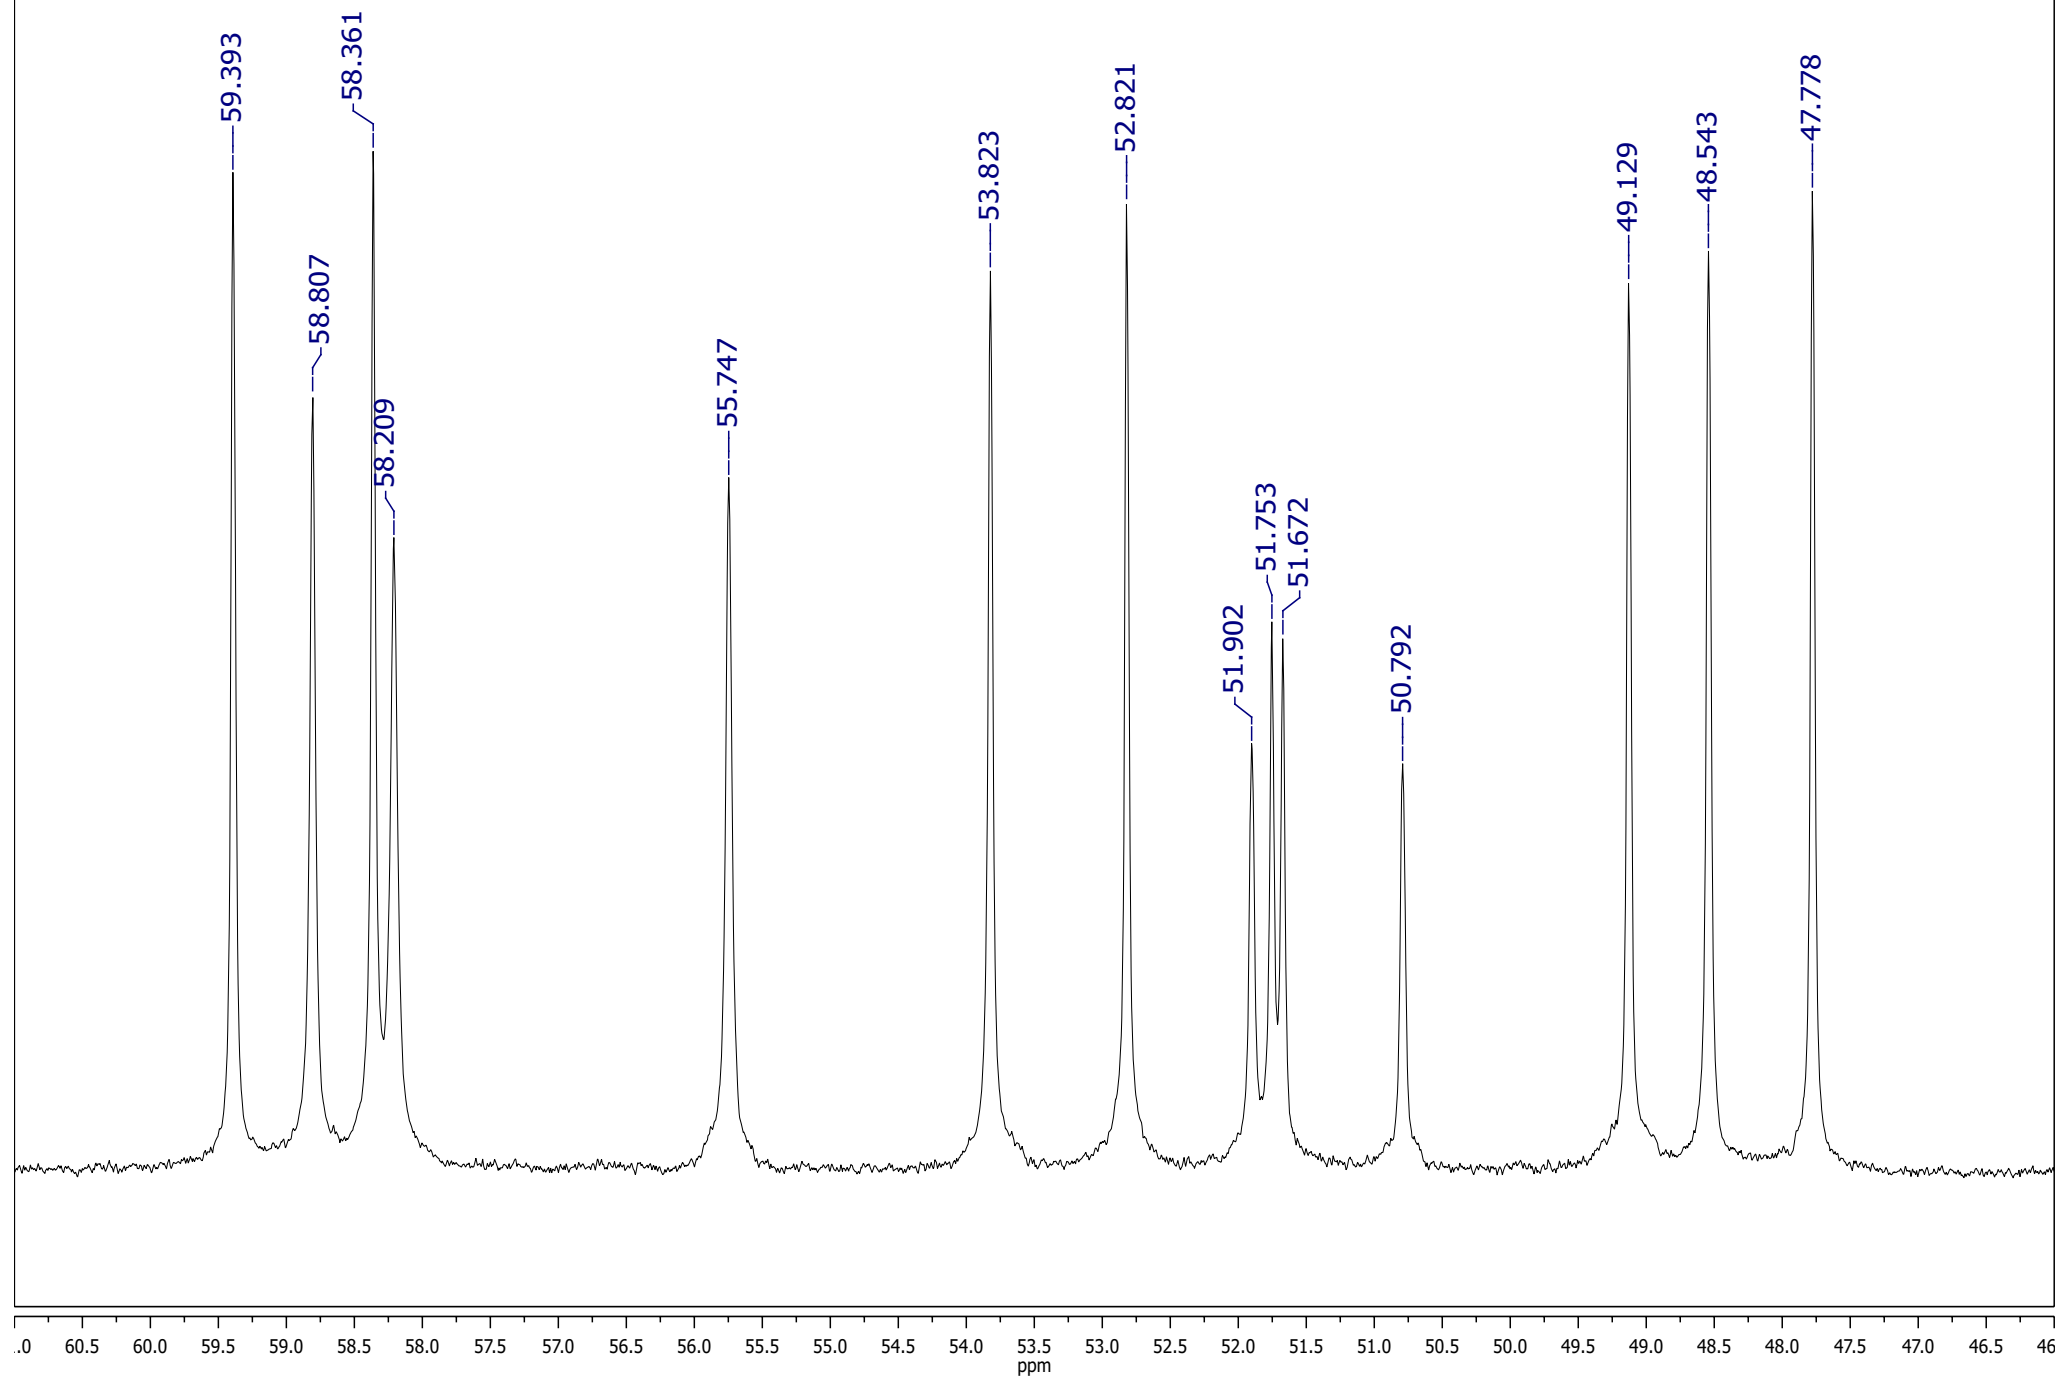

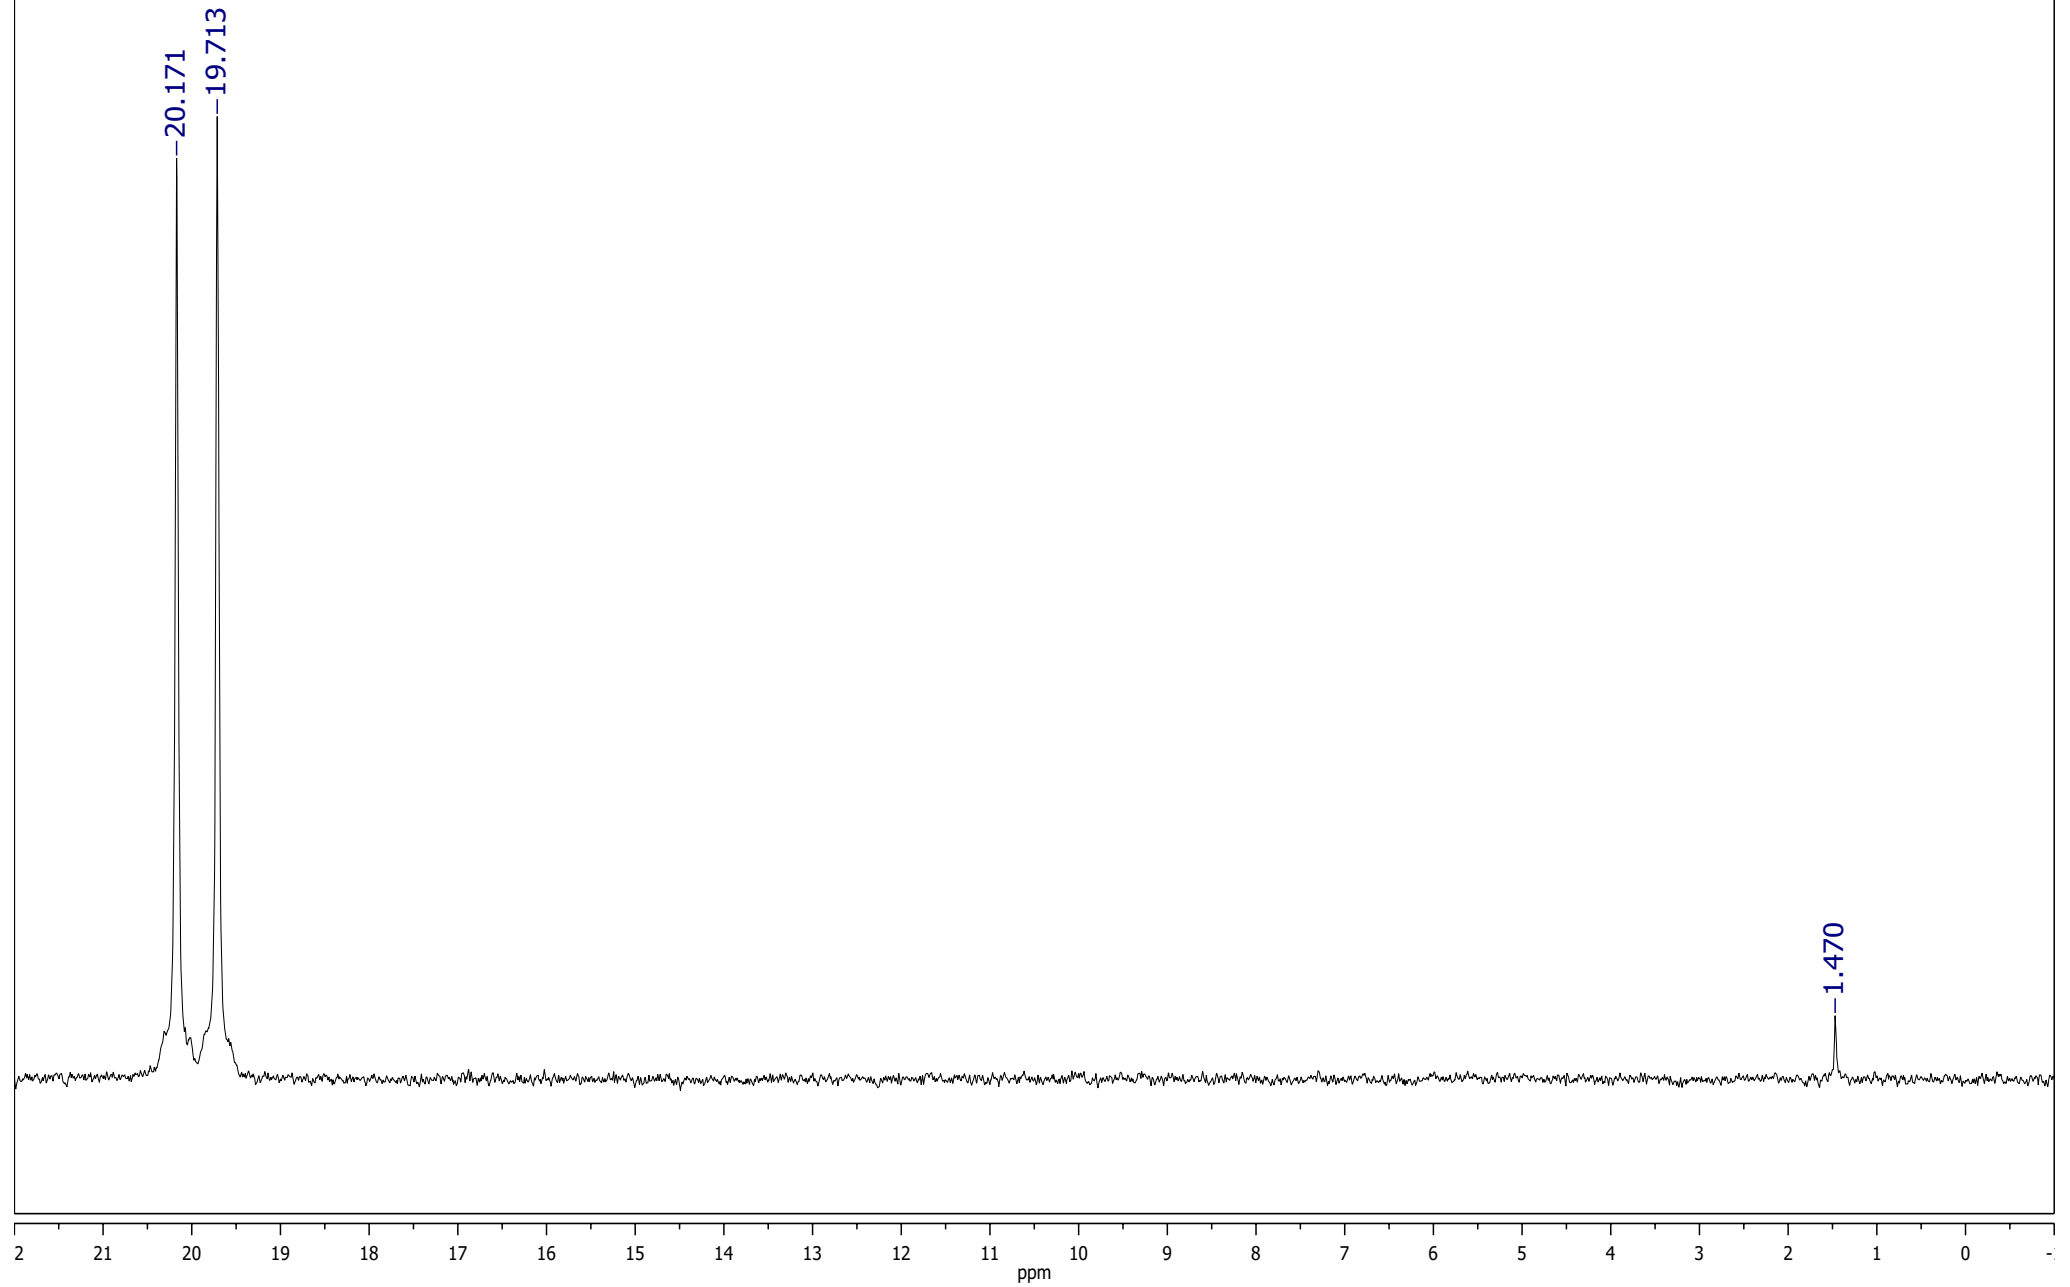

| Parameter                | Value                |
|--------------------------|----------------------|
| 1 Comment                | RF-CB-TE1A1P-125 MHz |
| 2 Origin                 | Varian               |
| 3 Solvent                | D2O                  |
| 4 Number of Scans        | 38000                |
| 5 Acquisition Time       | 1.0000               |
| 6 Acquisition Date       | 2011-01-22T08:03:16  |
| 7 Spectrometer Frequency | 125.68036            |
| 8 Spectral Width         | 31446.5              |
| 9 Lowest Frequency       | -3692.7              |
| 10 Nucleus               | 13C                  |
| 11 Acquired Size         | 31447                |
| 12 Spectral Size         | 65536                |

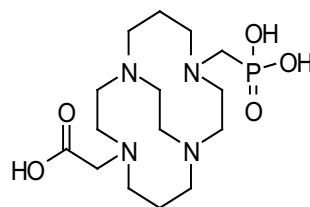

D<sub>2</sub>O, 125.68 MHz,  
MeCN as internal interference, set at  $\delta$  1.47

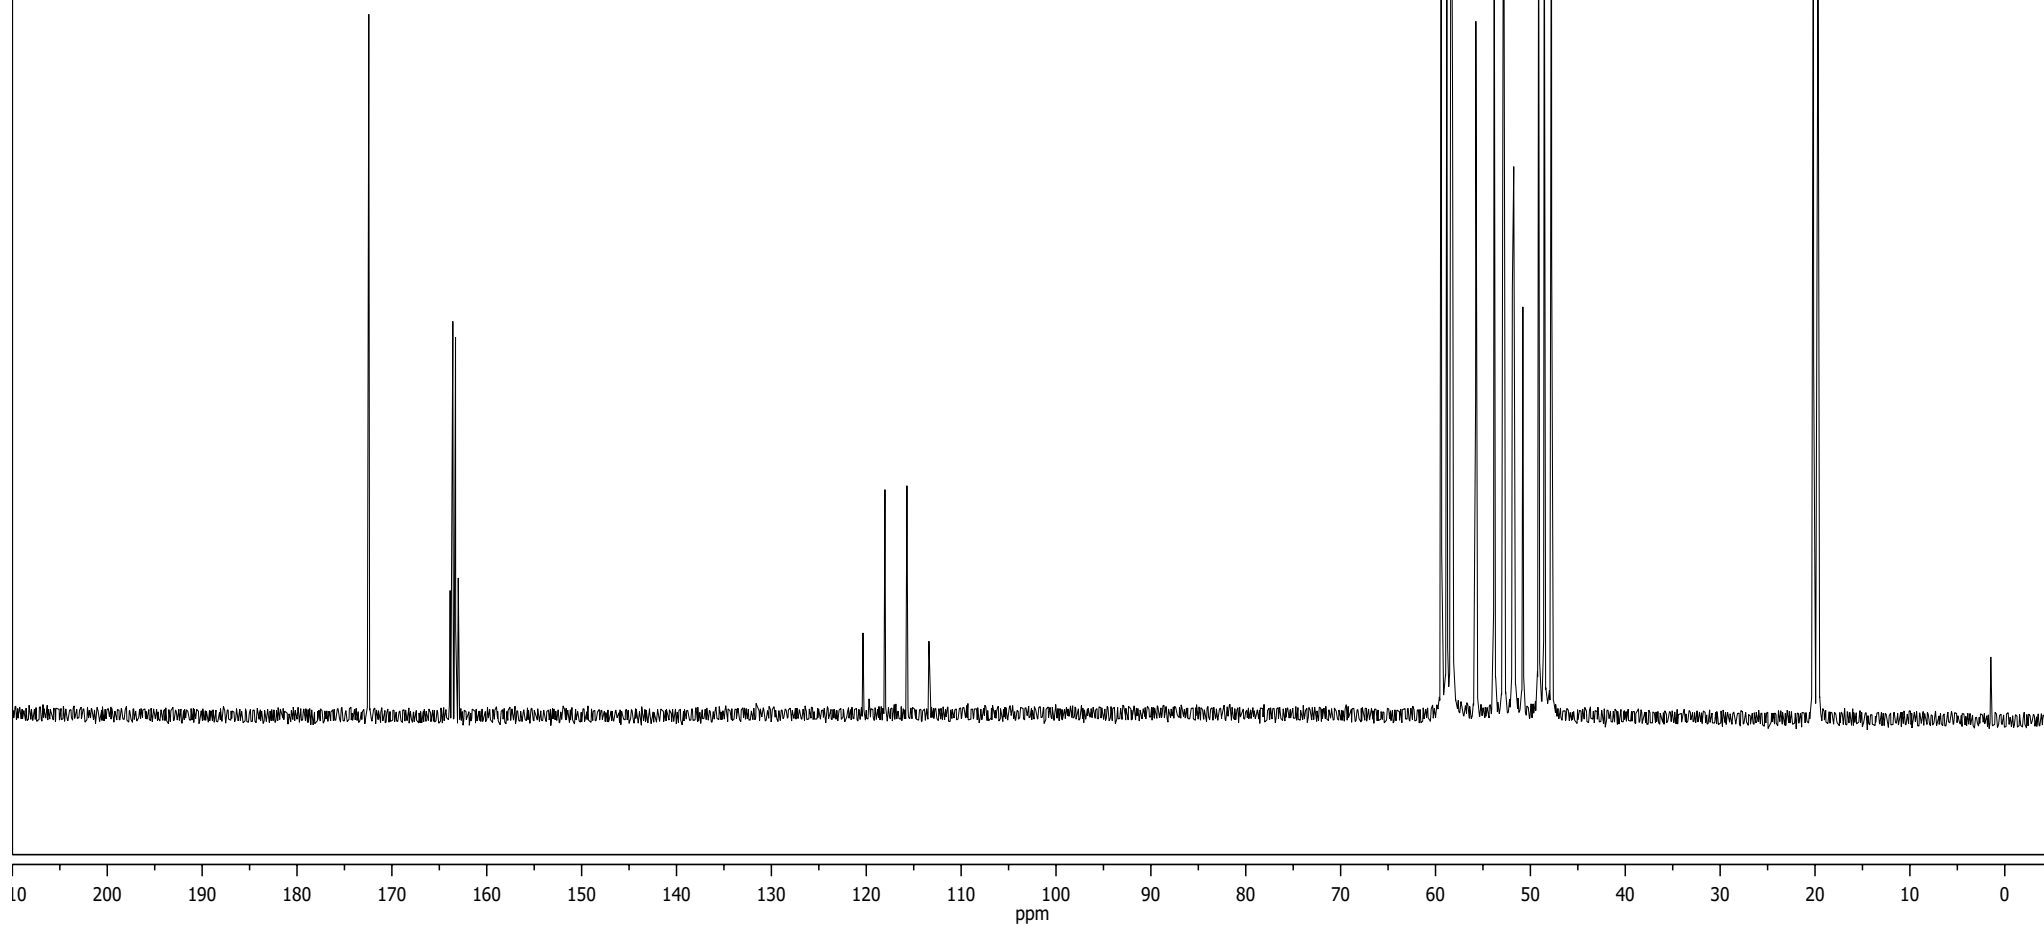

| Parameter                | Value                |
|--------------------------|----------------------|
| 1 Comment                | RF-CB-TE1A1P-100 MHz |
| 2 Origin                 | Varian               |
| 3 Solvent                | D2O                  |
| 4 Number of Scans        | 26560                |
| 5 Acquisition Time       | 1.0025               |
| 6 Acquisition Date       | 2011-01-25T18:03:03  |
| 7 Spectrometer Frequency | 100.52657            |
| 8 Spectral Width         | 25062.7              |
| 9 Lowest Frequency       | -1418.1              |
| 10 Nucleus               | <sup>13</sup> C      |
| 11 Acquired Size         | 25126                |
| 12 Spectral Size         | 65536                |

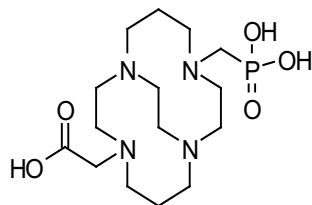

D<sub>2</sub>O, 100.53 MHz,  
MeCN as internal interference, set at  $\delta$  1.47

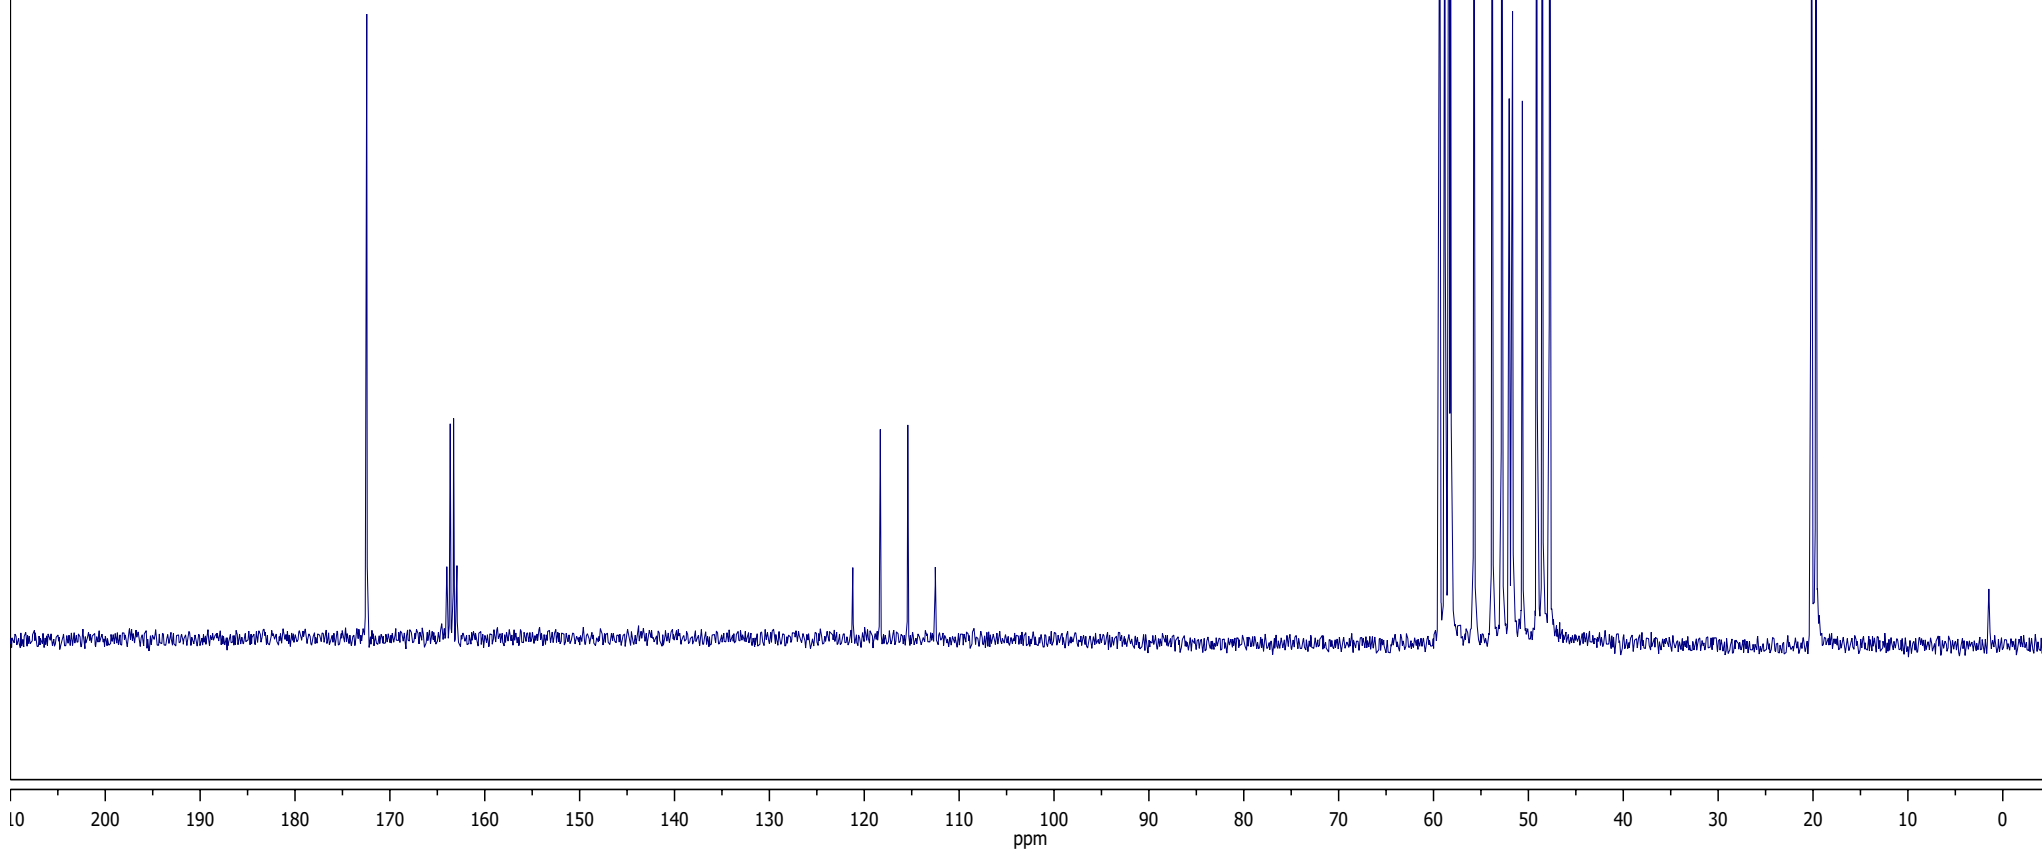

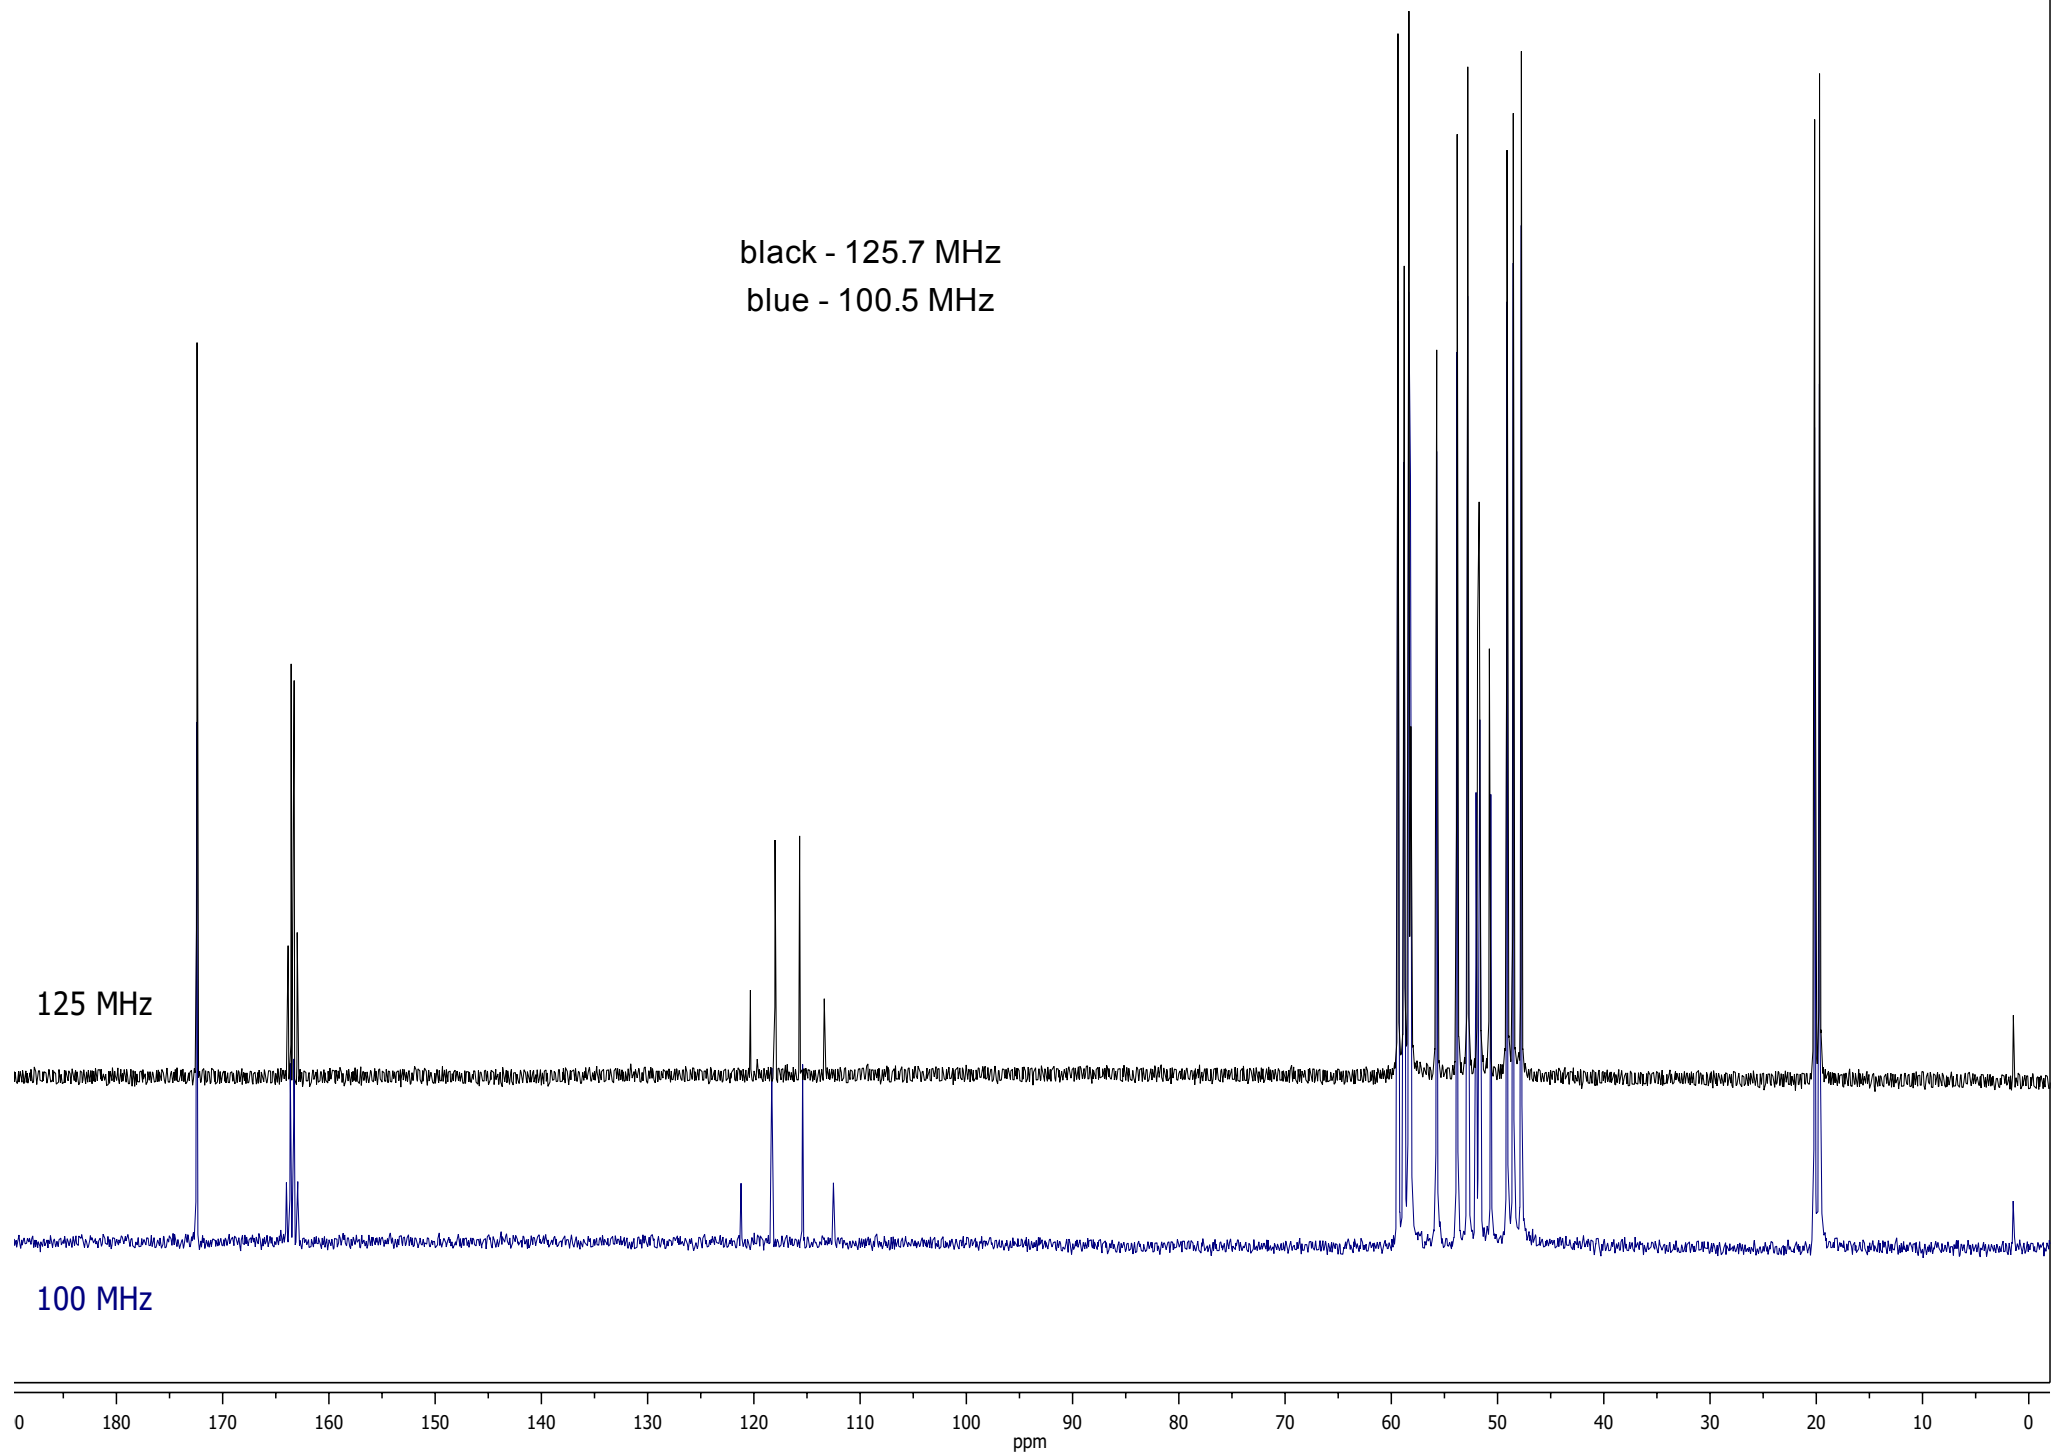

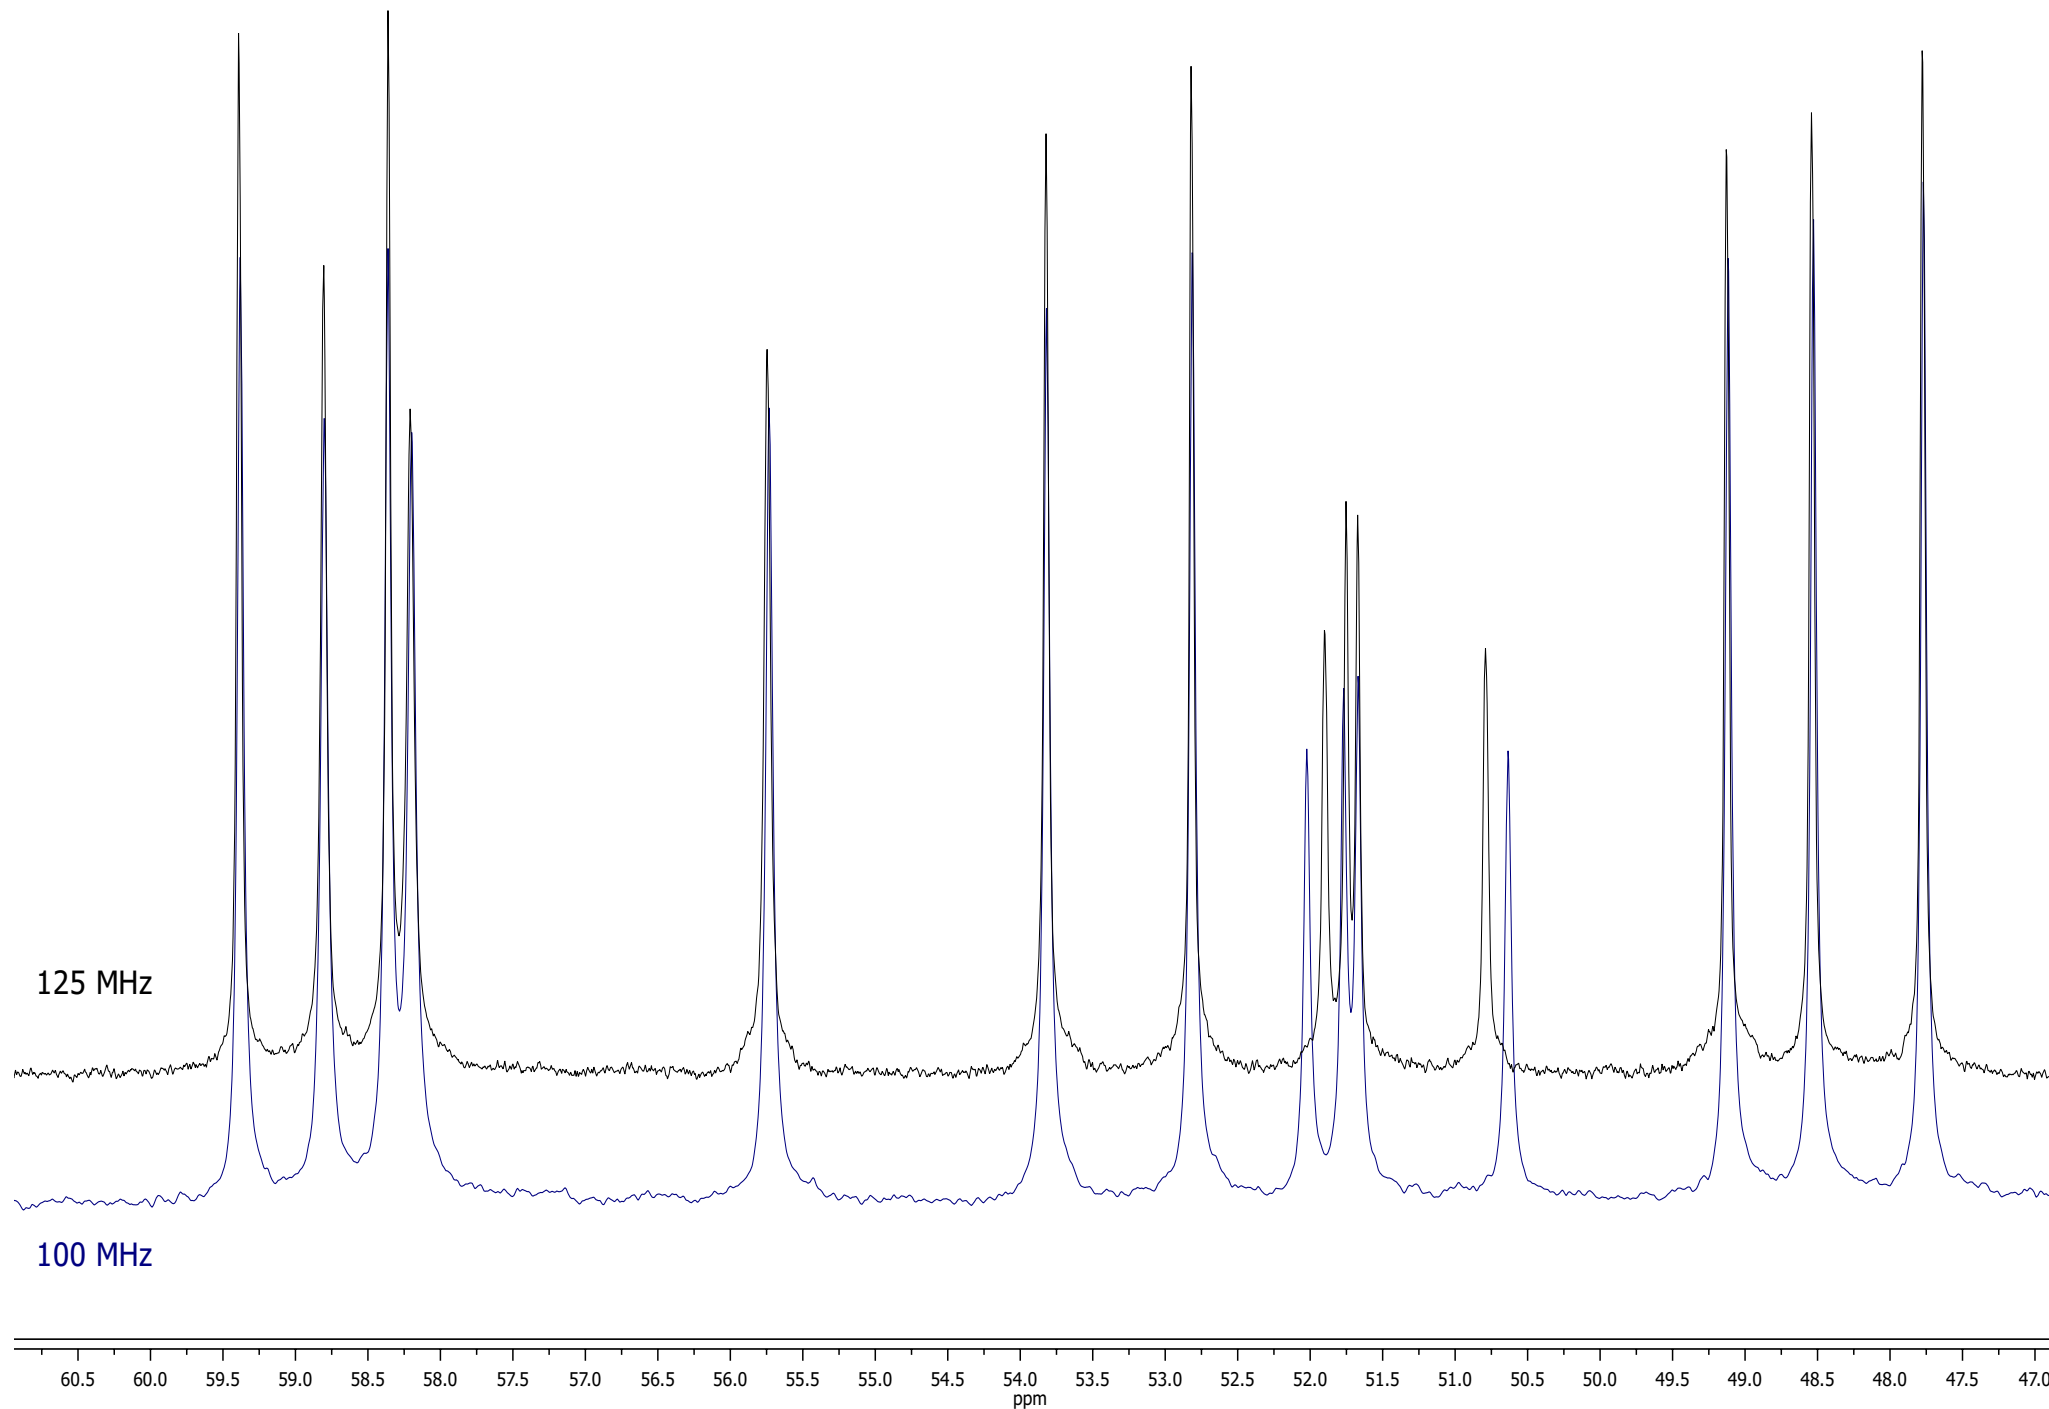

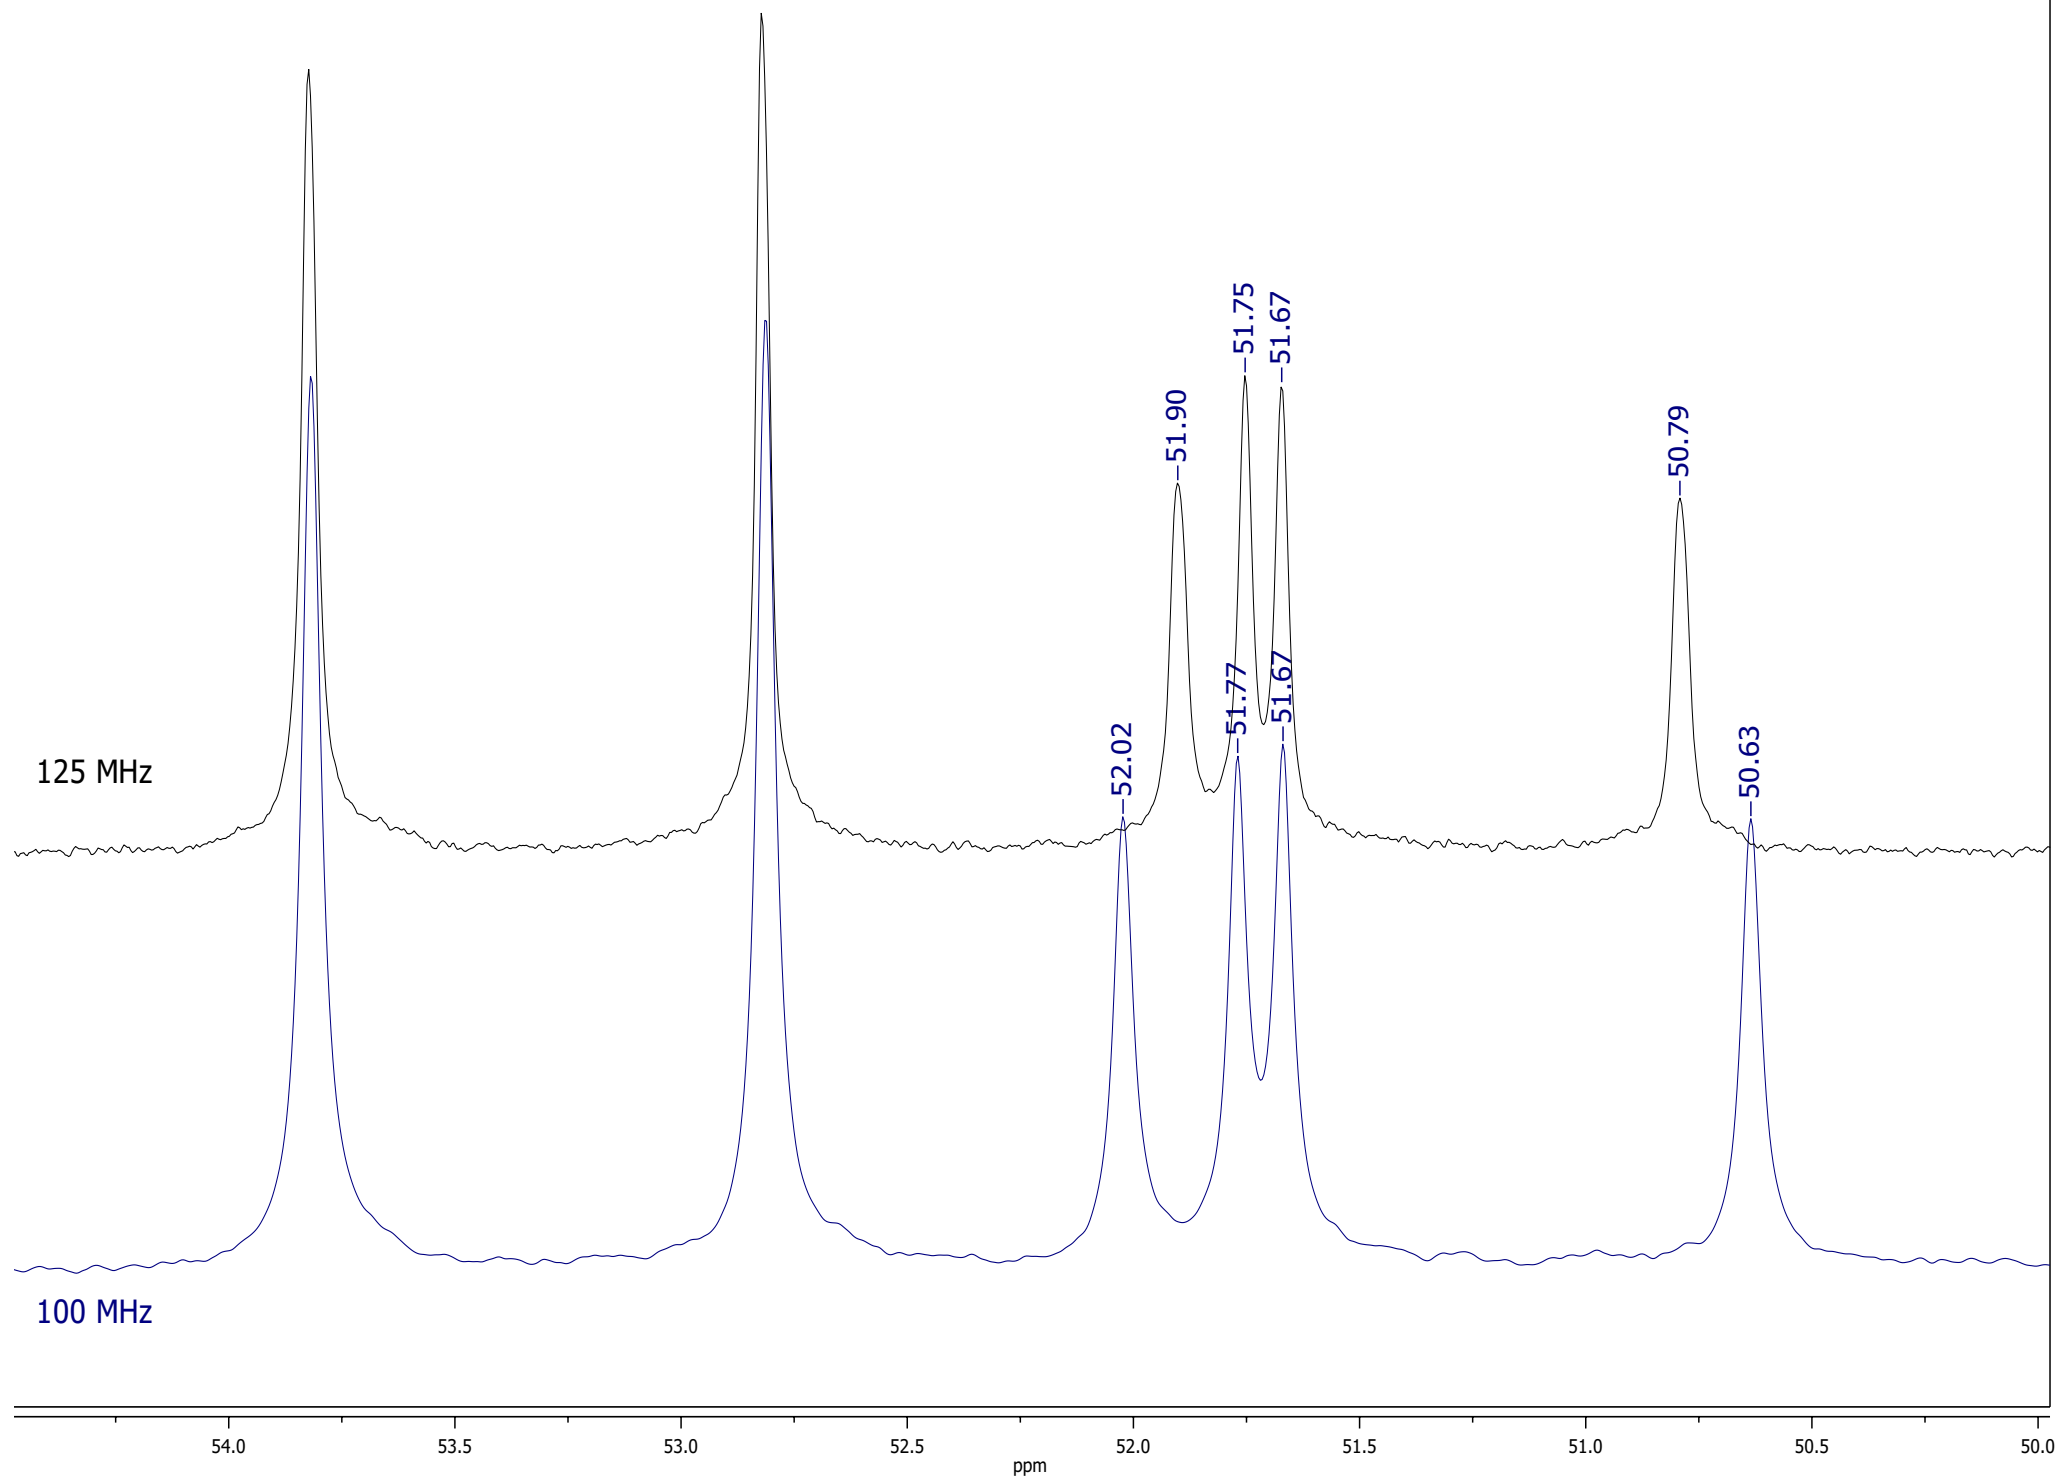

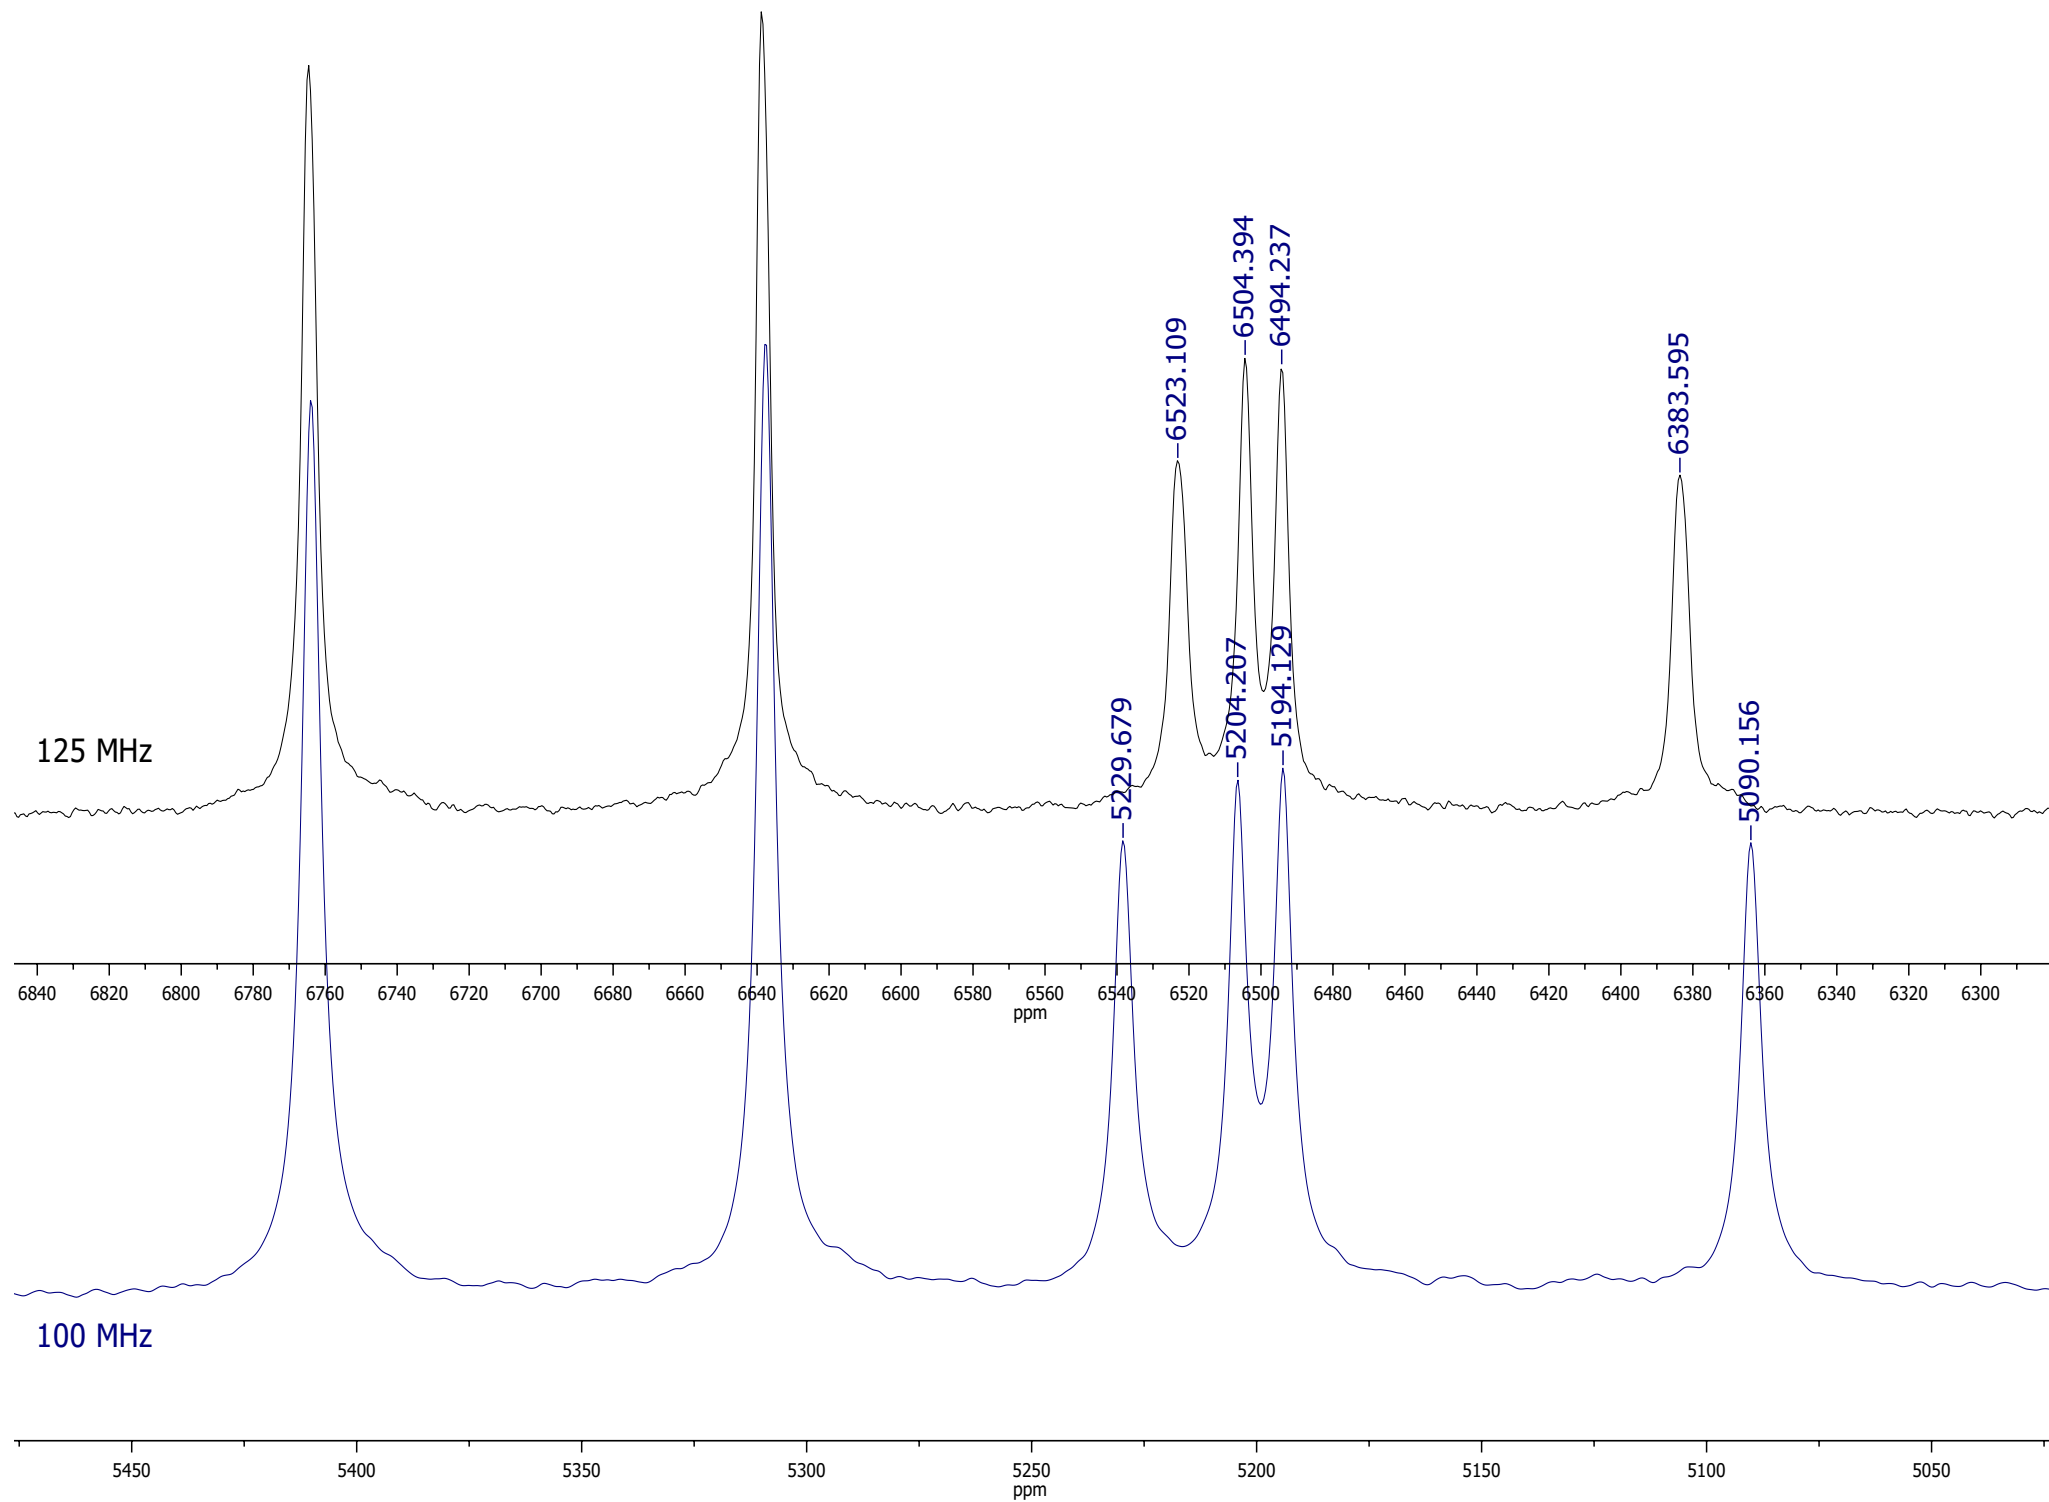

|    |                        |                     |
|----|------------------------|---------------------|
| 1  | Origin                 | RF-CB-TE1A1P        |
| 2  | Solvent                | D2O                 |
| 3  | Temperature            | 25.0                |
| 4  | Number of Scans        | 16                  |
| 5  | Acquisition Time       | 3.0000              |
| 6  | Acquisition Date       | 2011-01-24T15:29:41 |
| 7  | Spectrometer Frequency | 499.77707           |
| 8  | Spectral Width         | 7992.0              |
| 9  | Lowest Frequency       | -1396.6             |
| 10 | Nucleus                | $^1\text{H}$        |
| 11 | Acquired Size          | 23976               |
| 12 | Spectral Size          | 65536               |

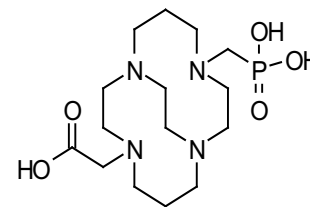

D<sub>2</sub>O, 499.78 MHz, internal reference  
with MeCN set at  $\delta$  2.06

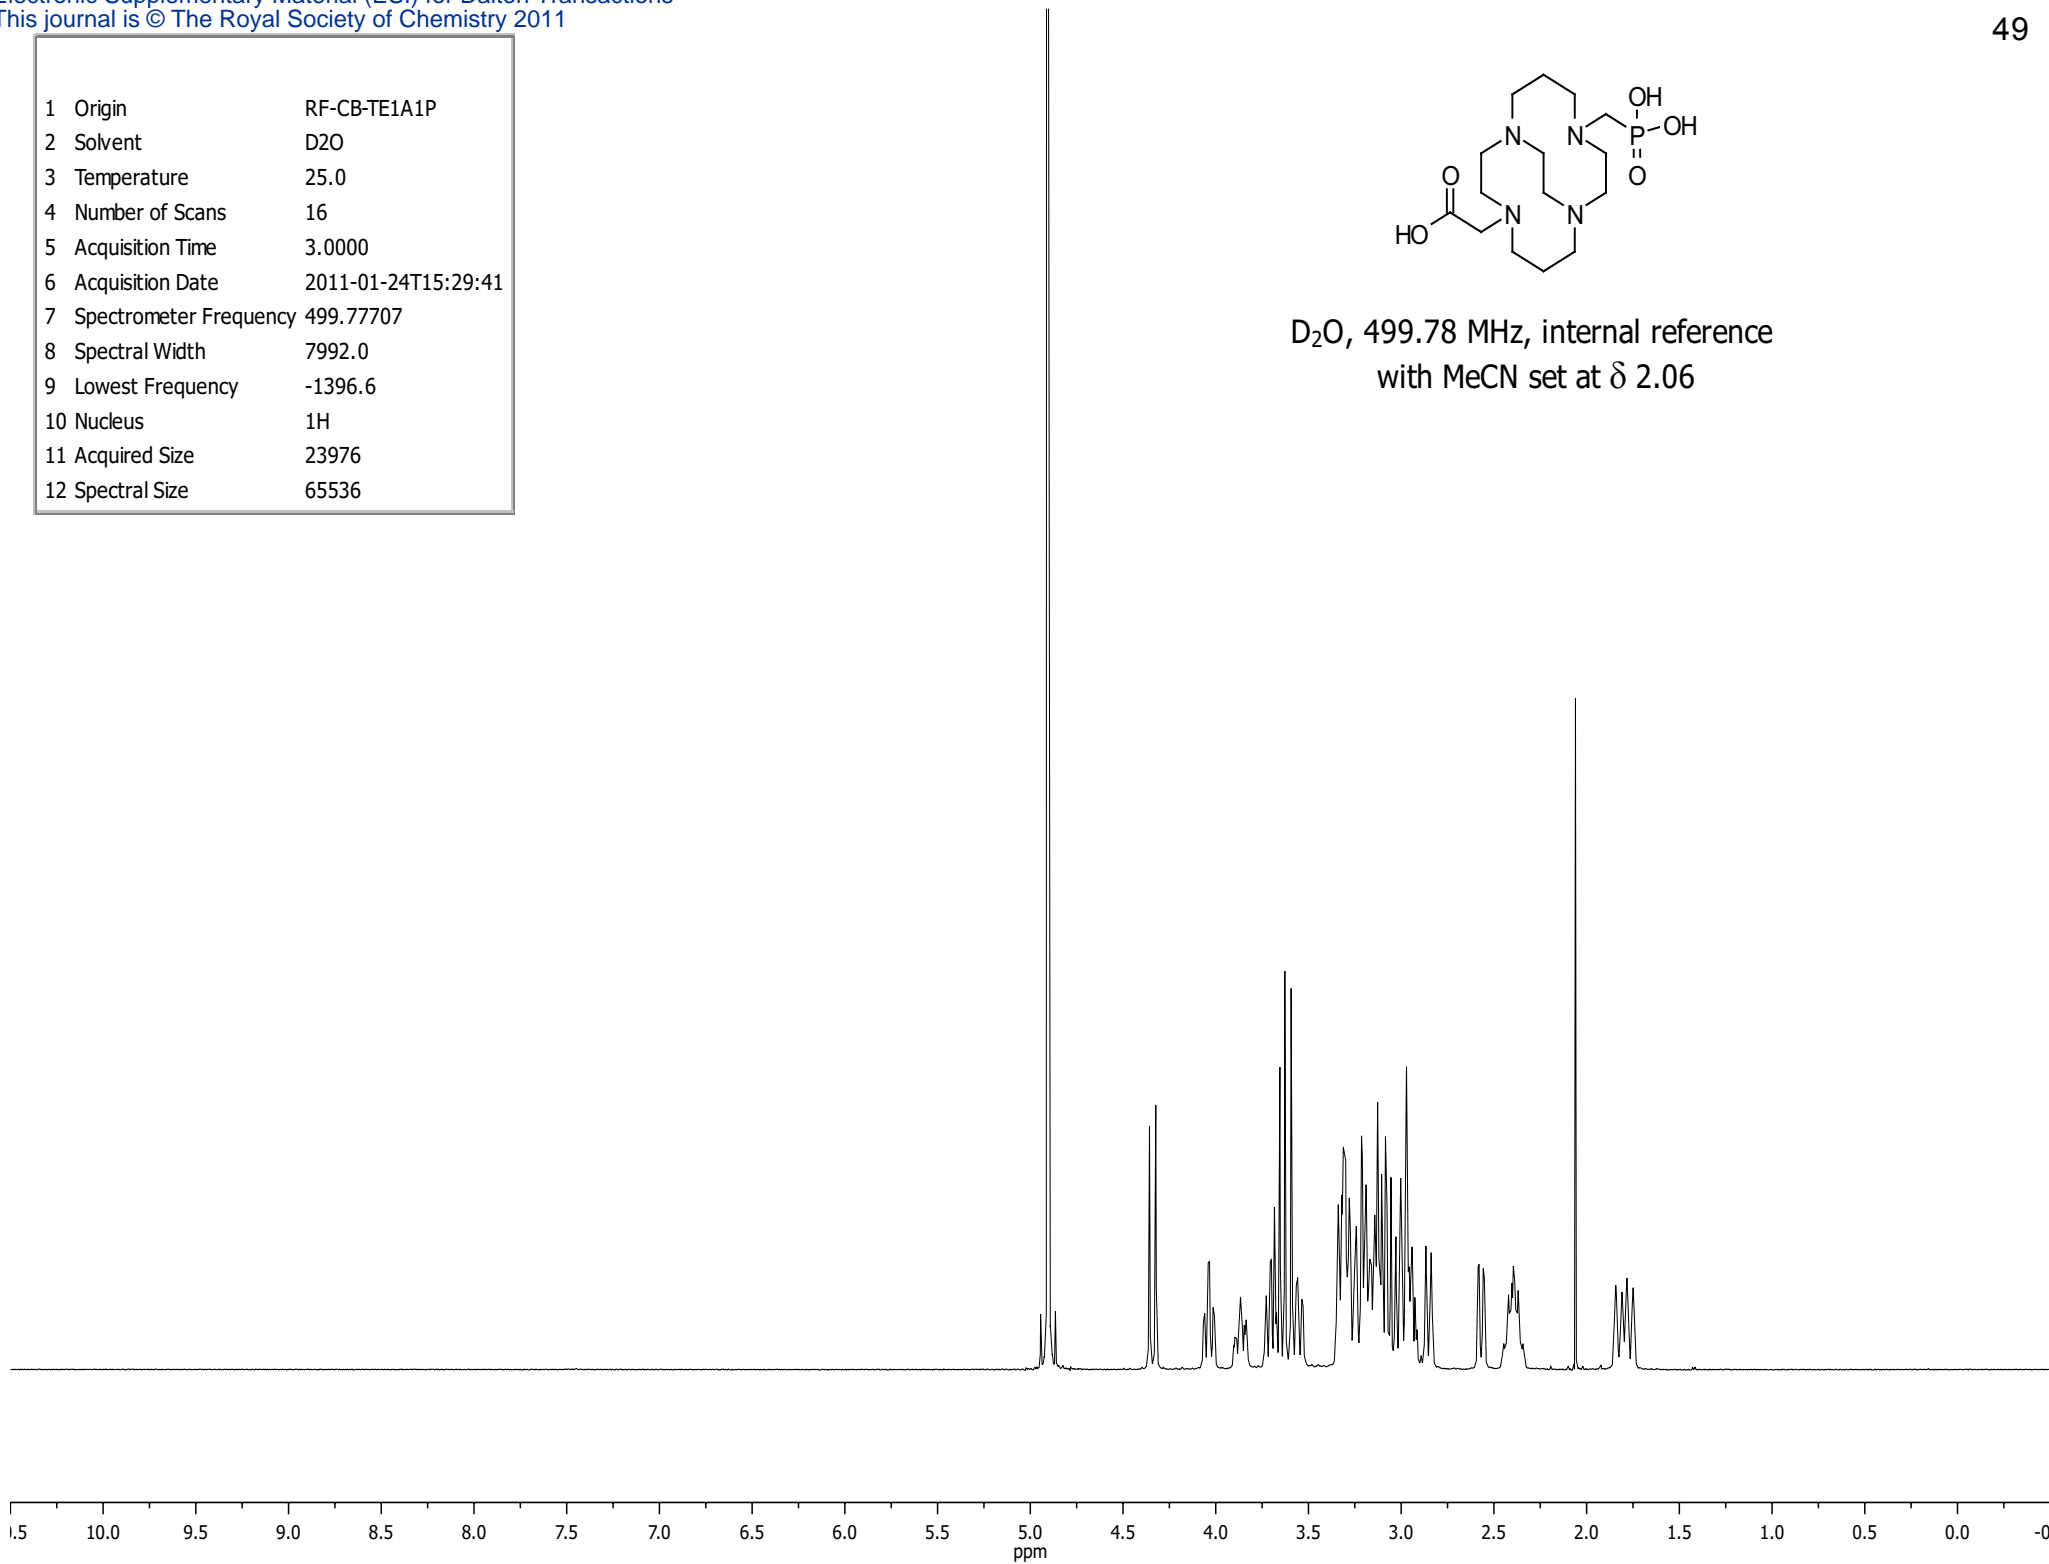

|    |                        |                     |
|----|------------------------|---------------------|
| 1  | Origin                 | RF-CB-TE1A1P        |
| 2  | Solvent                | D2O                 |
| 3  | Temperature            | 25.0                |
| 4  | Number of Scans        | 38000               |
| 5  | Acquisition Time       | 1.0000              |
| 6  | Acquisition Date       | 2011-01-22T08:03:16 |
| 7  | Spectrometer Frequency | 125.68036           |
| 8  | Spectral Width         | 31446.5             |
| 9  | Lowest Frequency       | -3692.7             |
| 10 | Nucleus                | <sup>13</sup> C     |
| 11 | Acquired Size          | 31447               |
| 12 | Spectral Size          | 65536               |

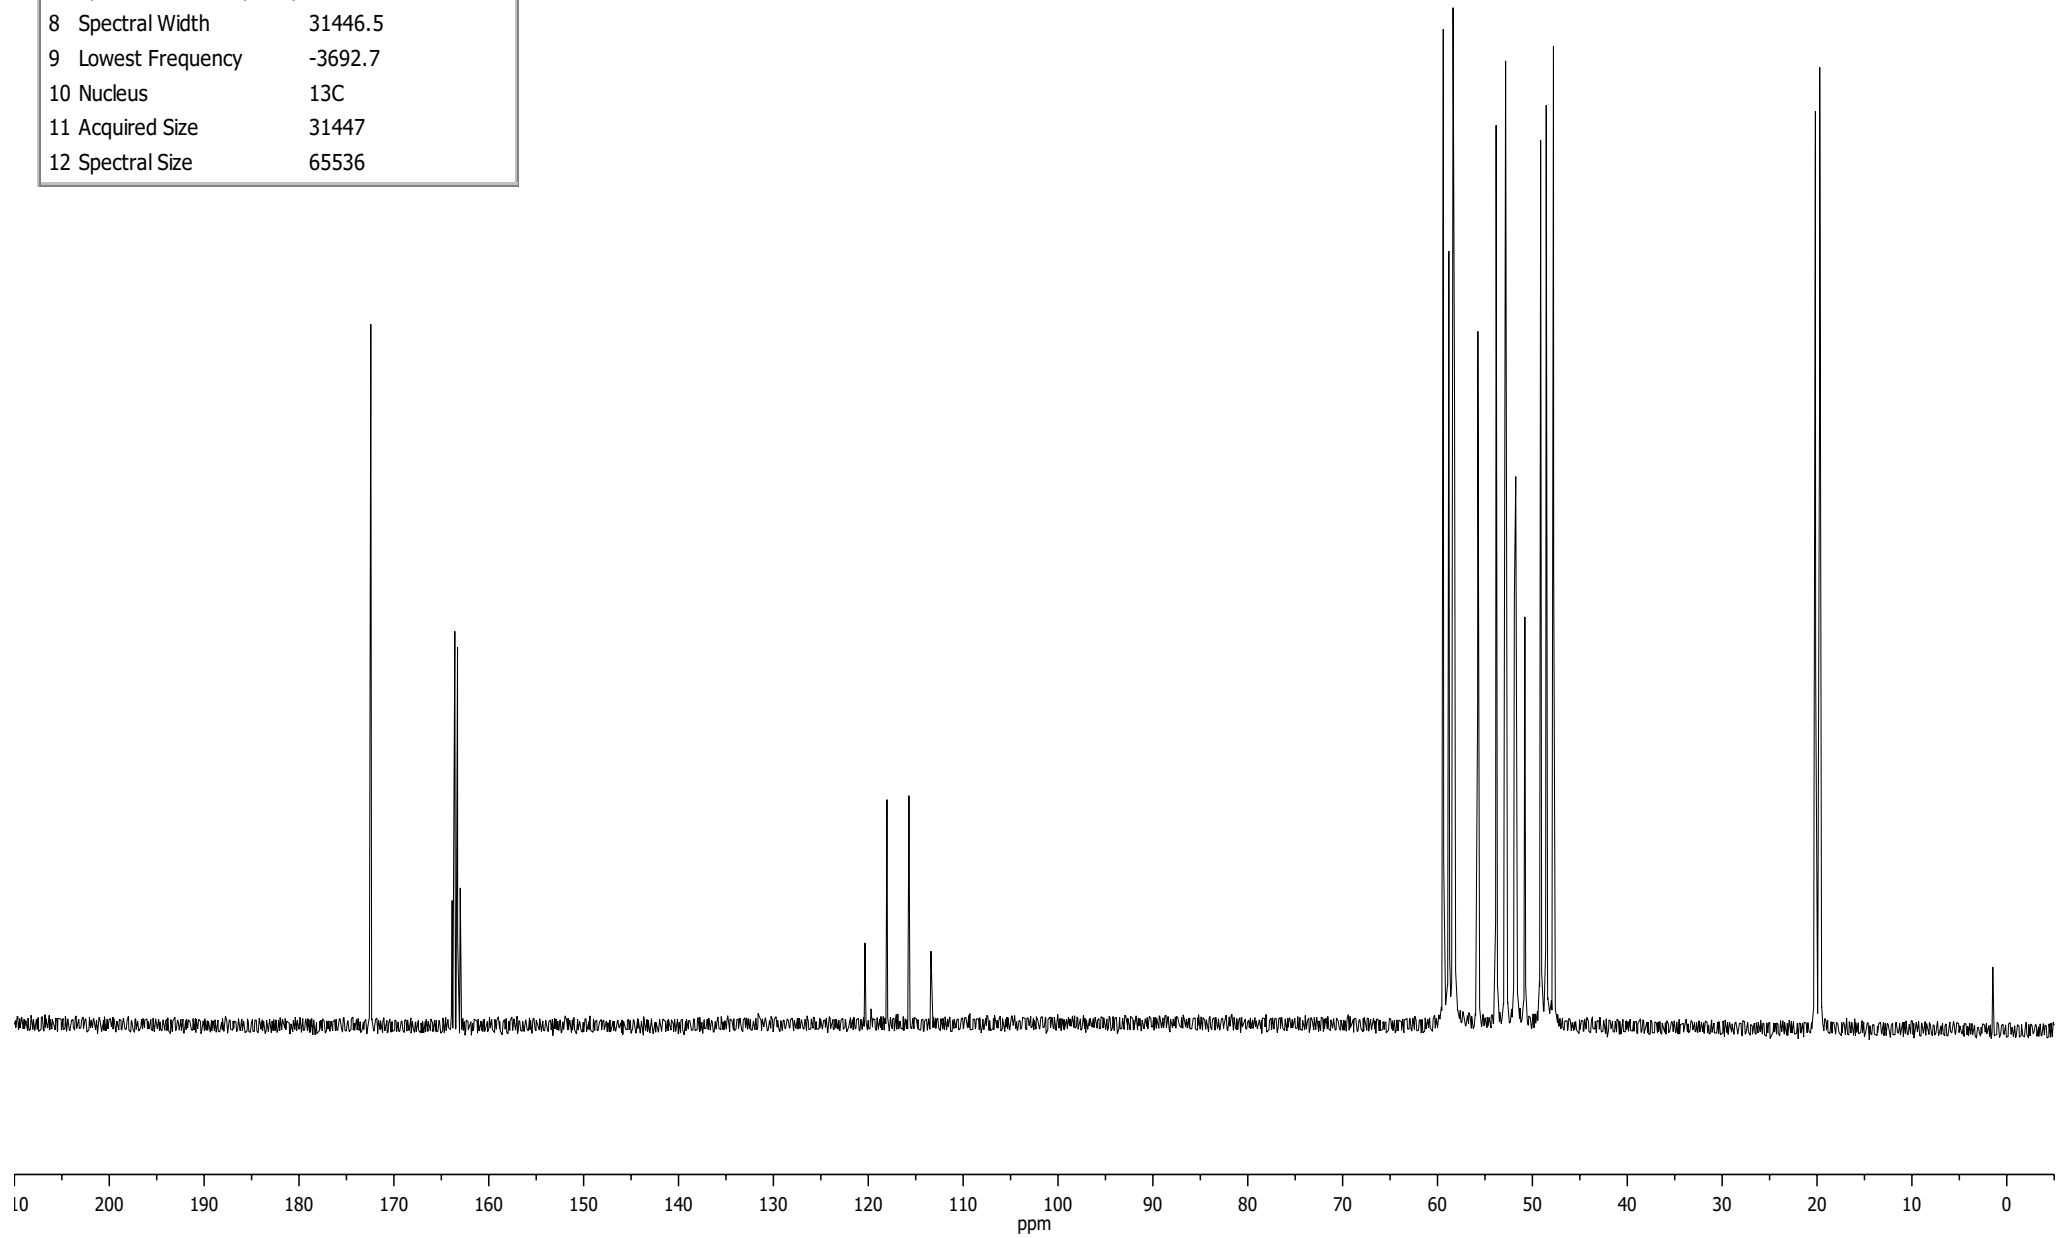

(See previous two pages for corresponding  
1D proton and carbon spectra)

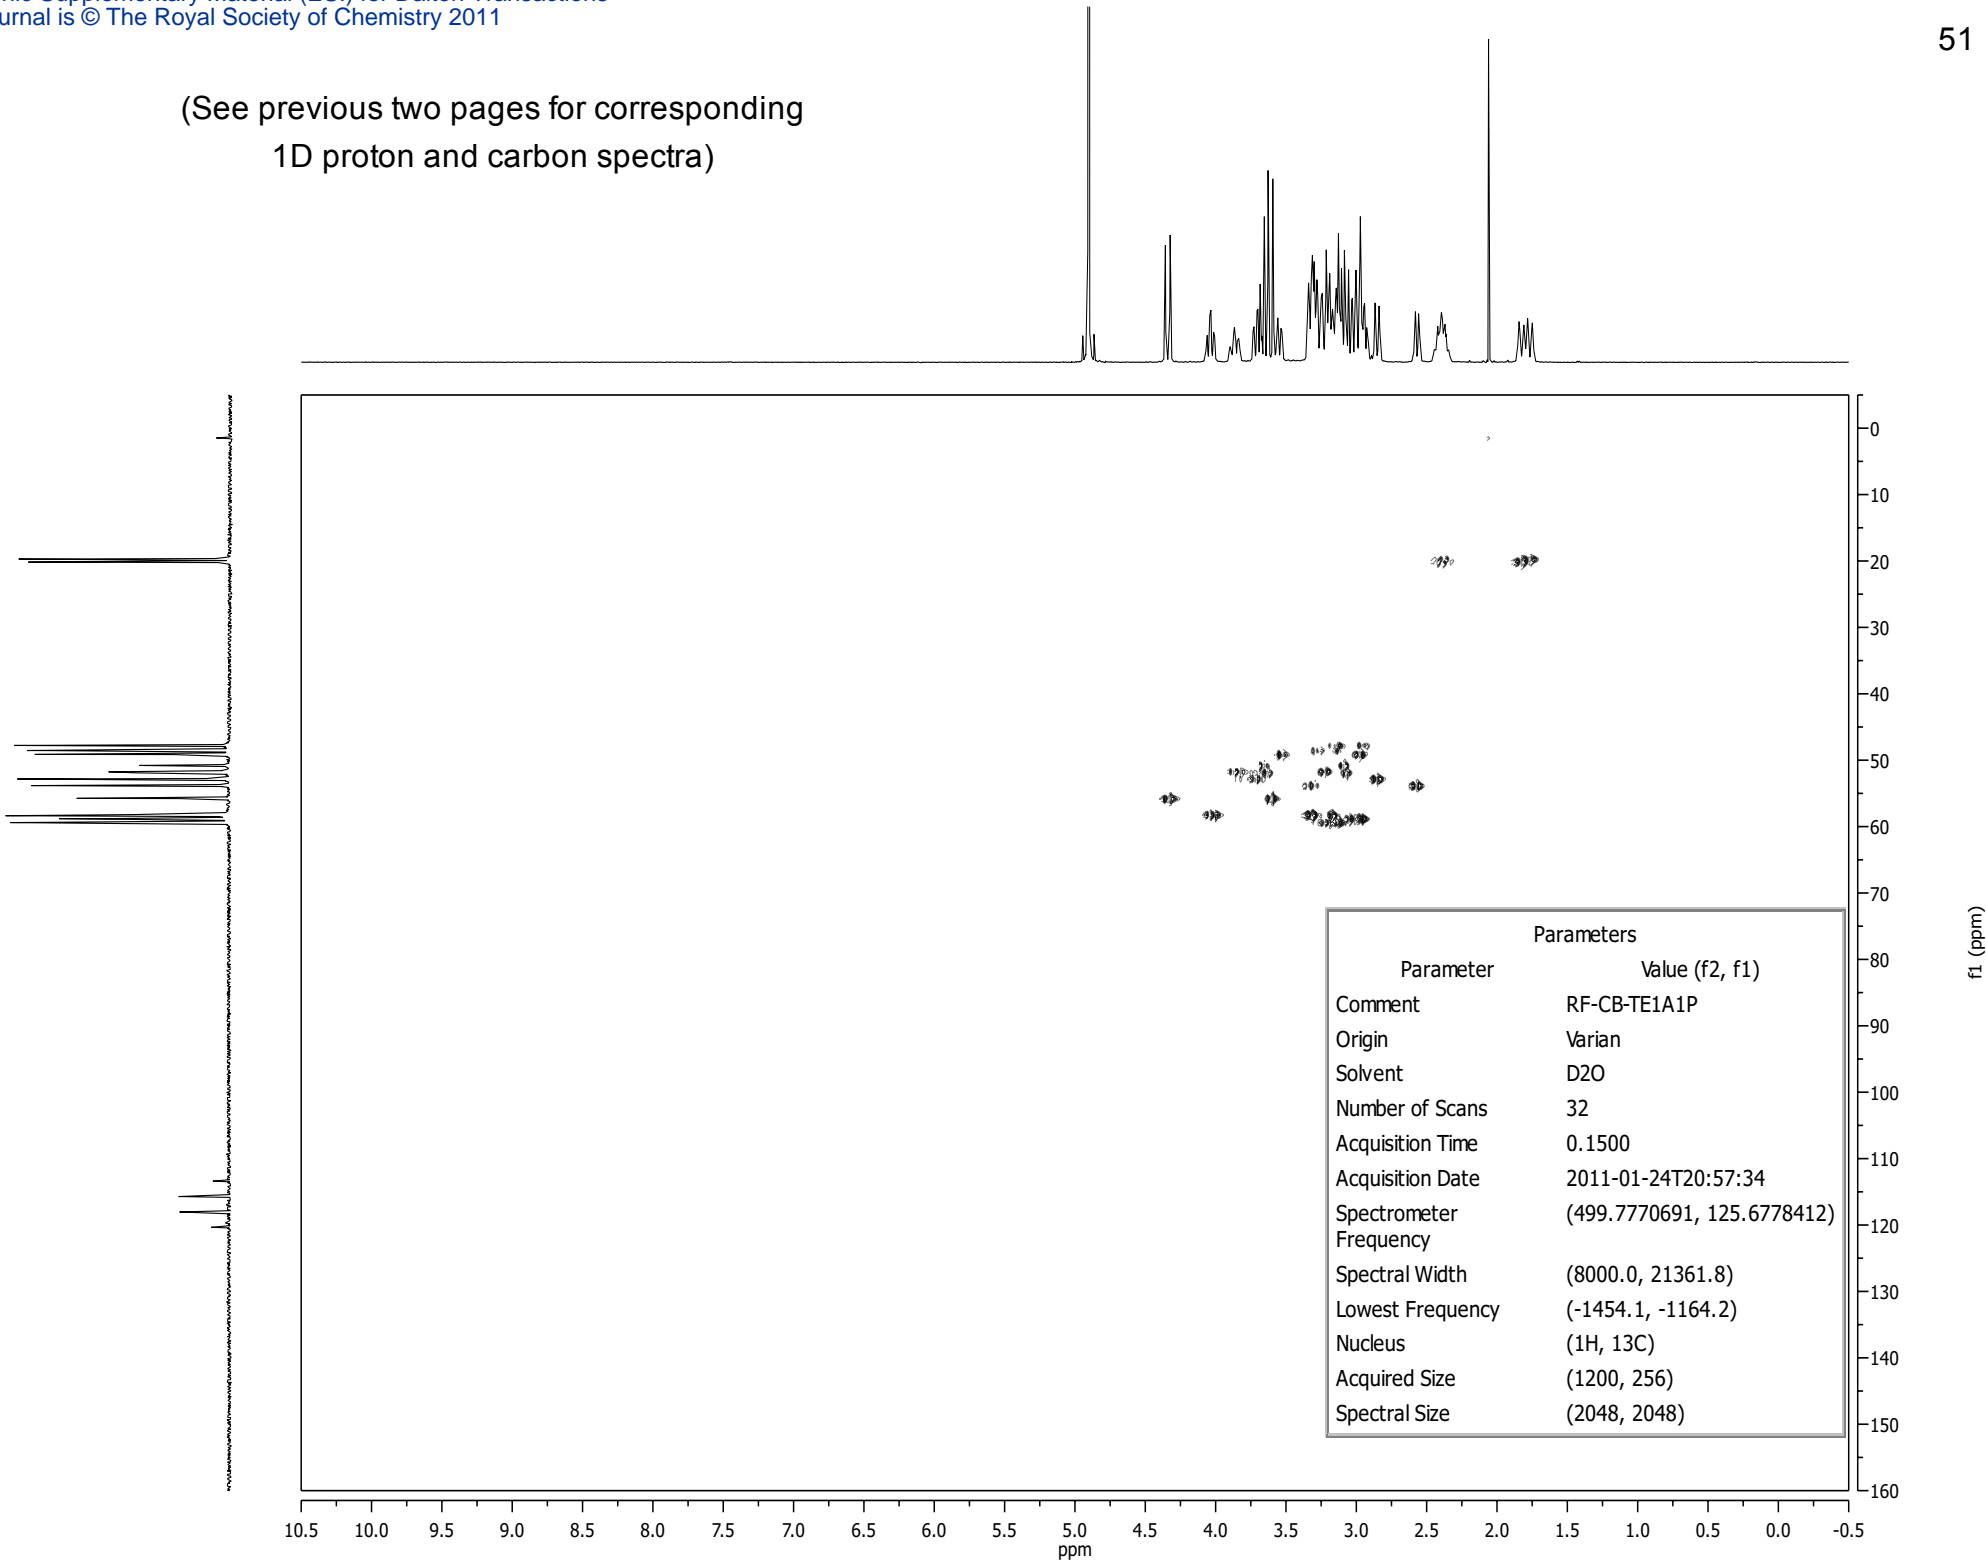

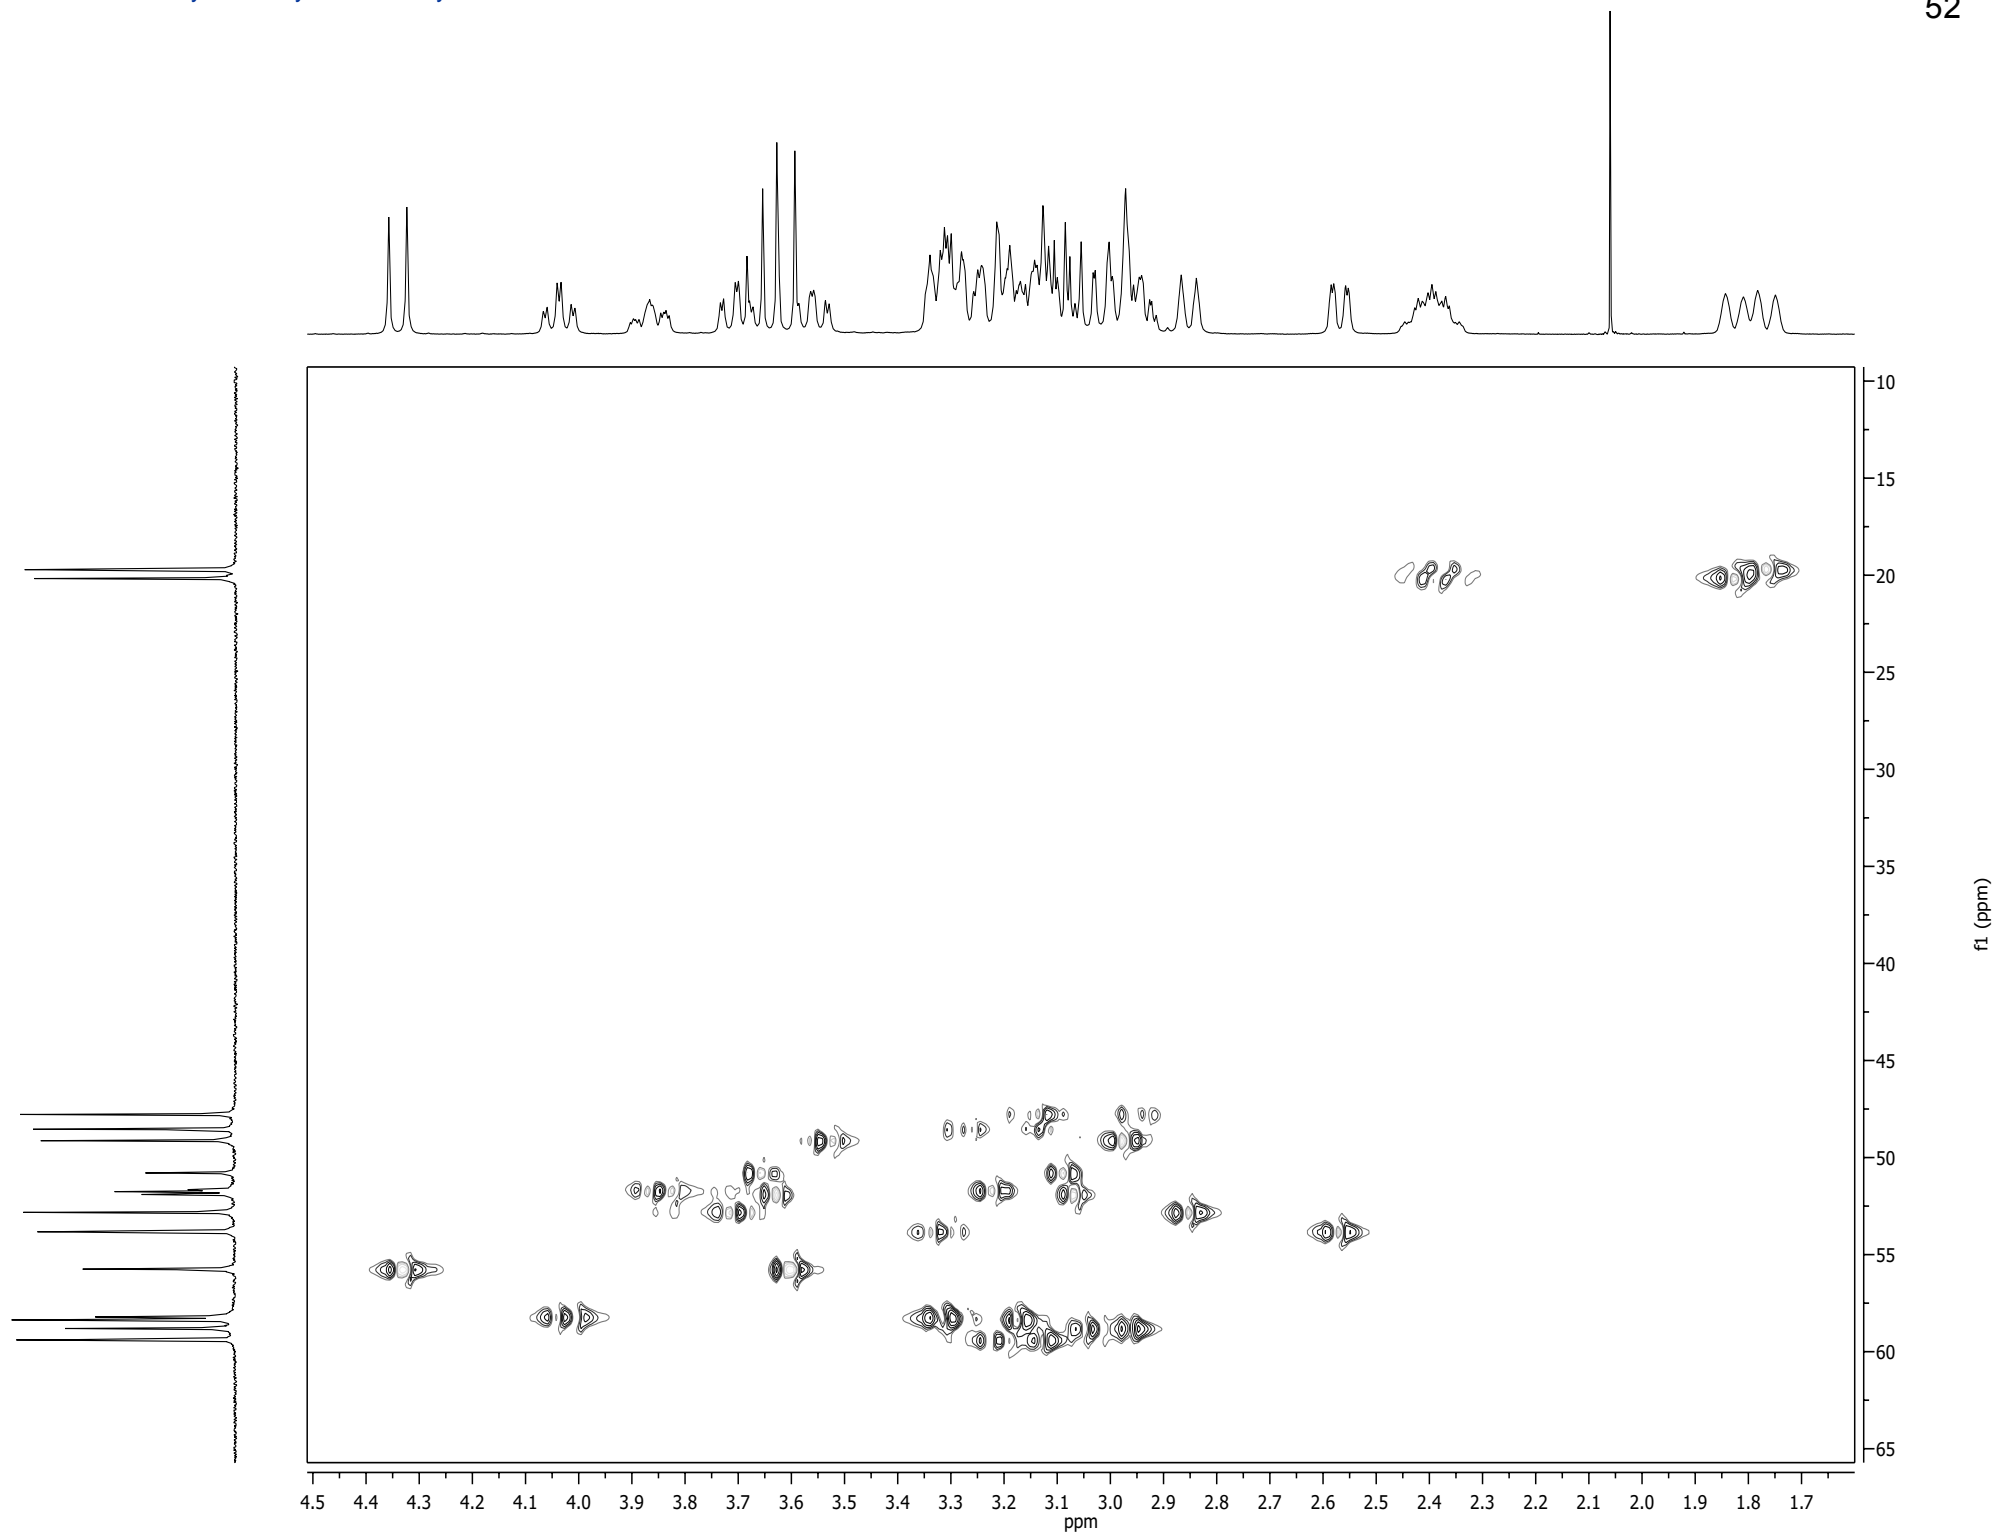

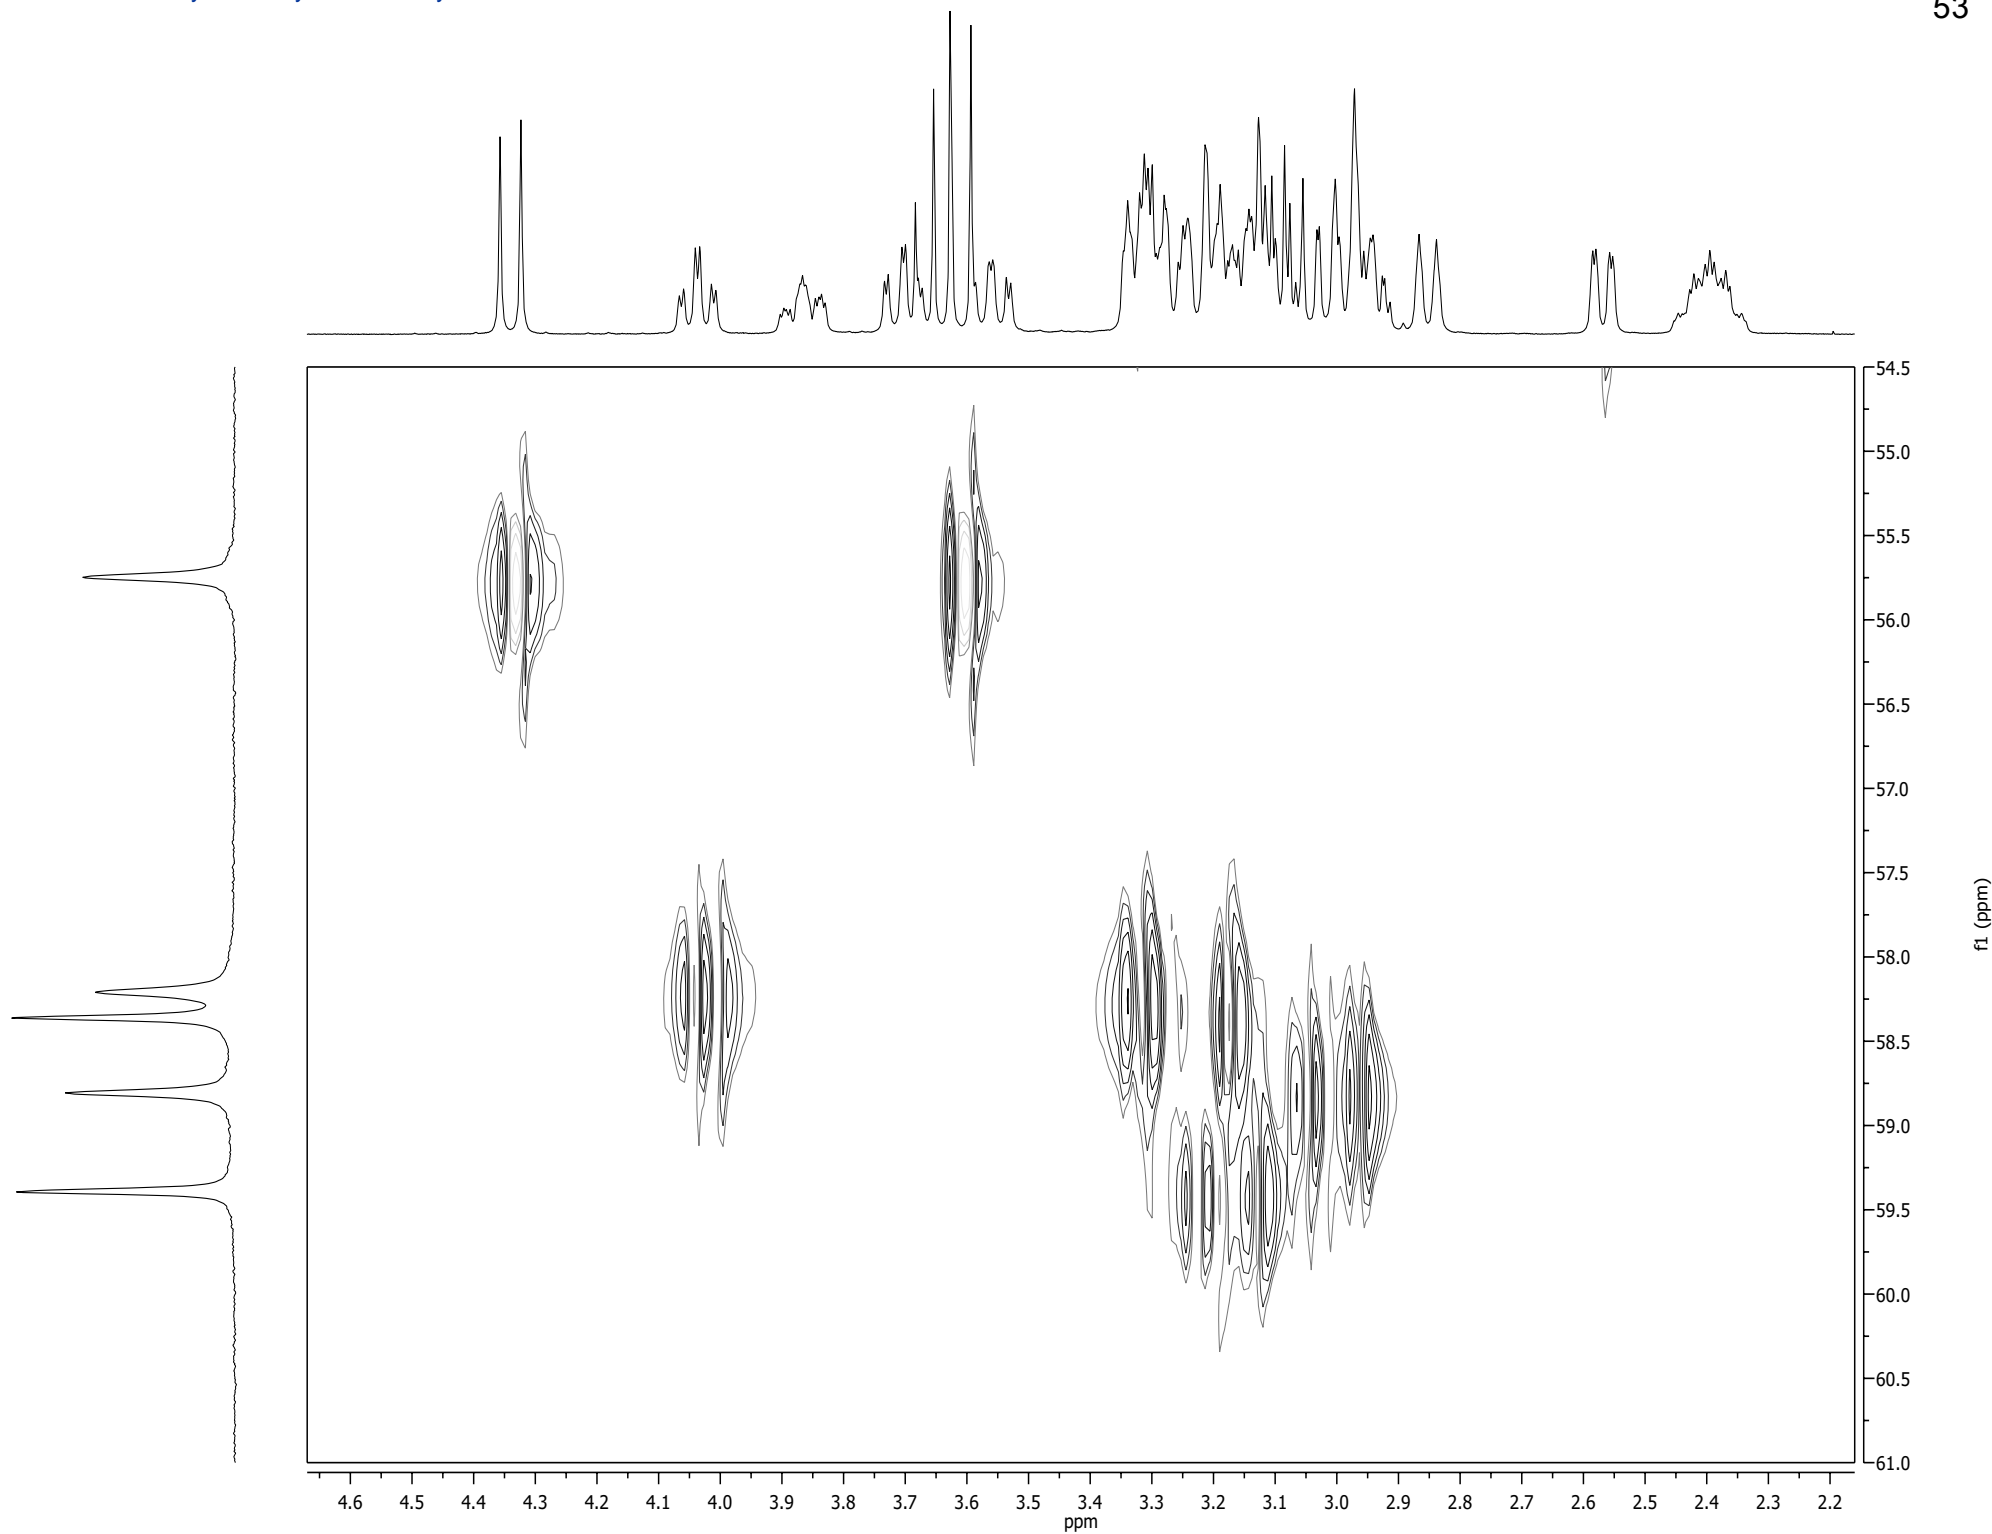

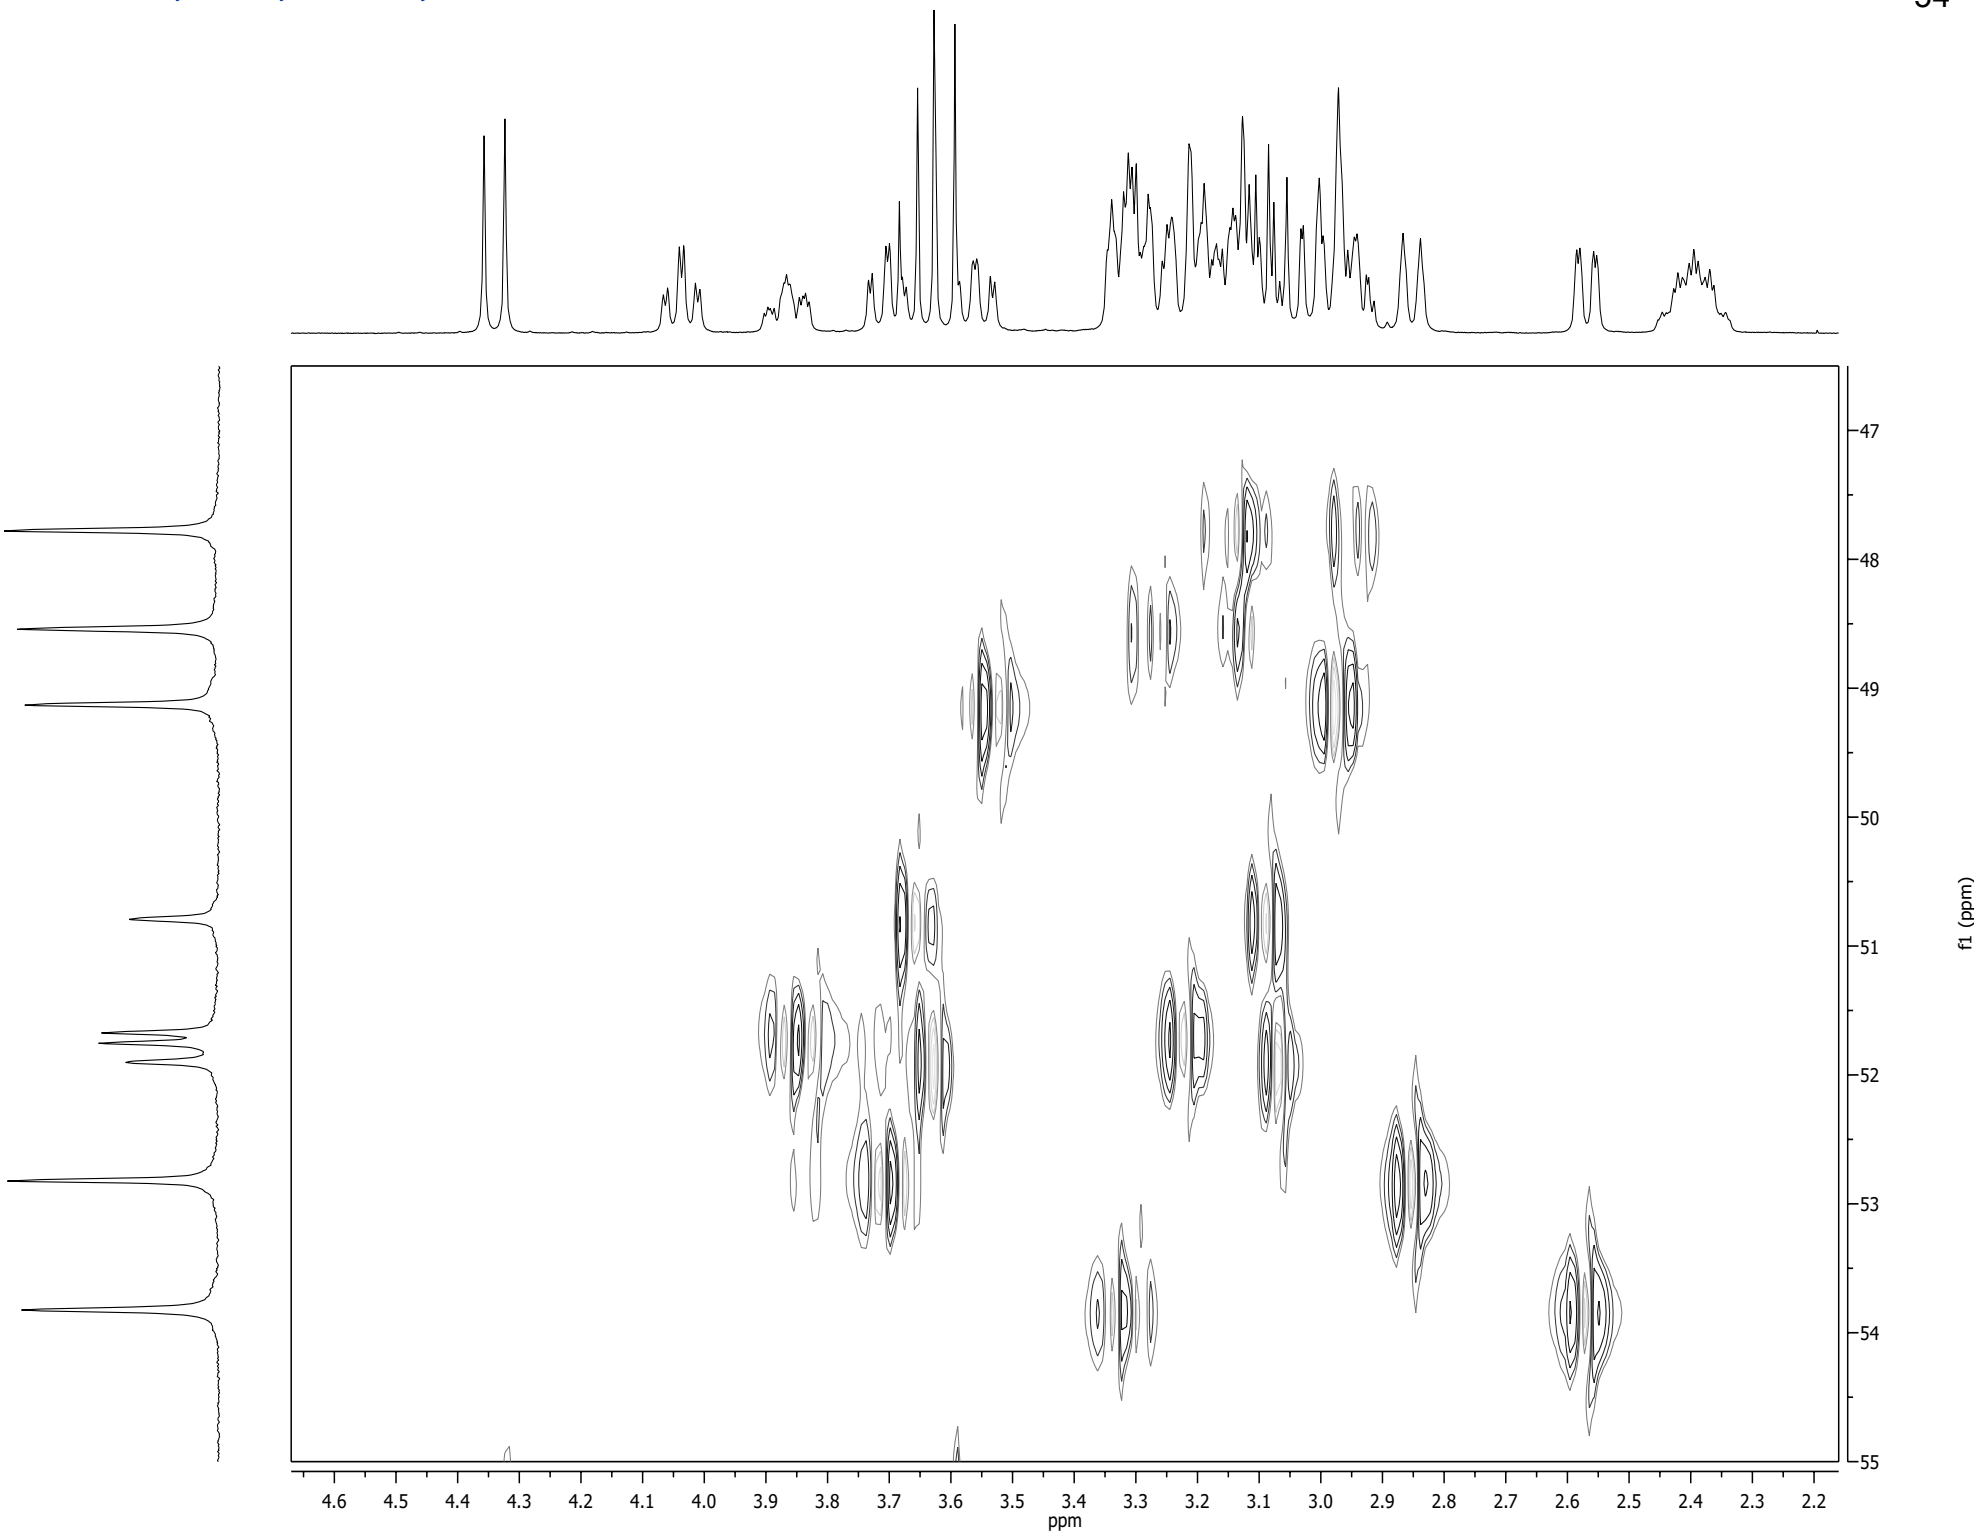

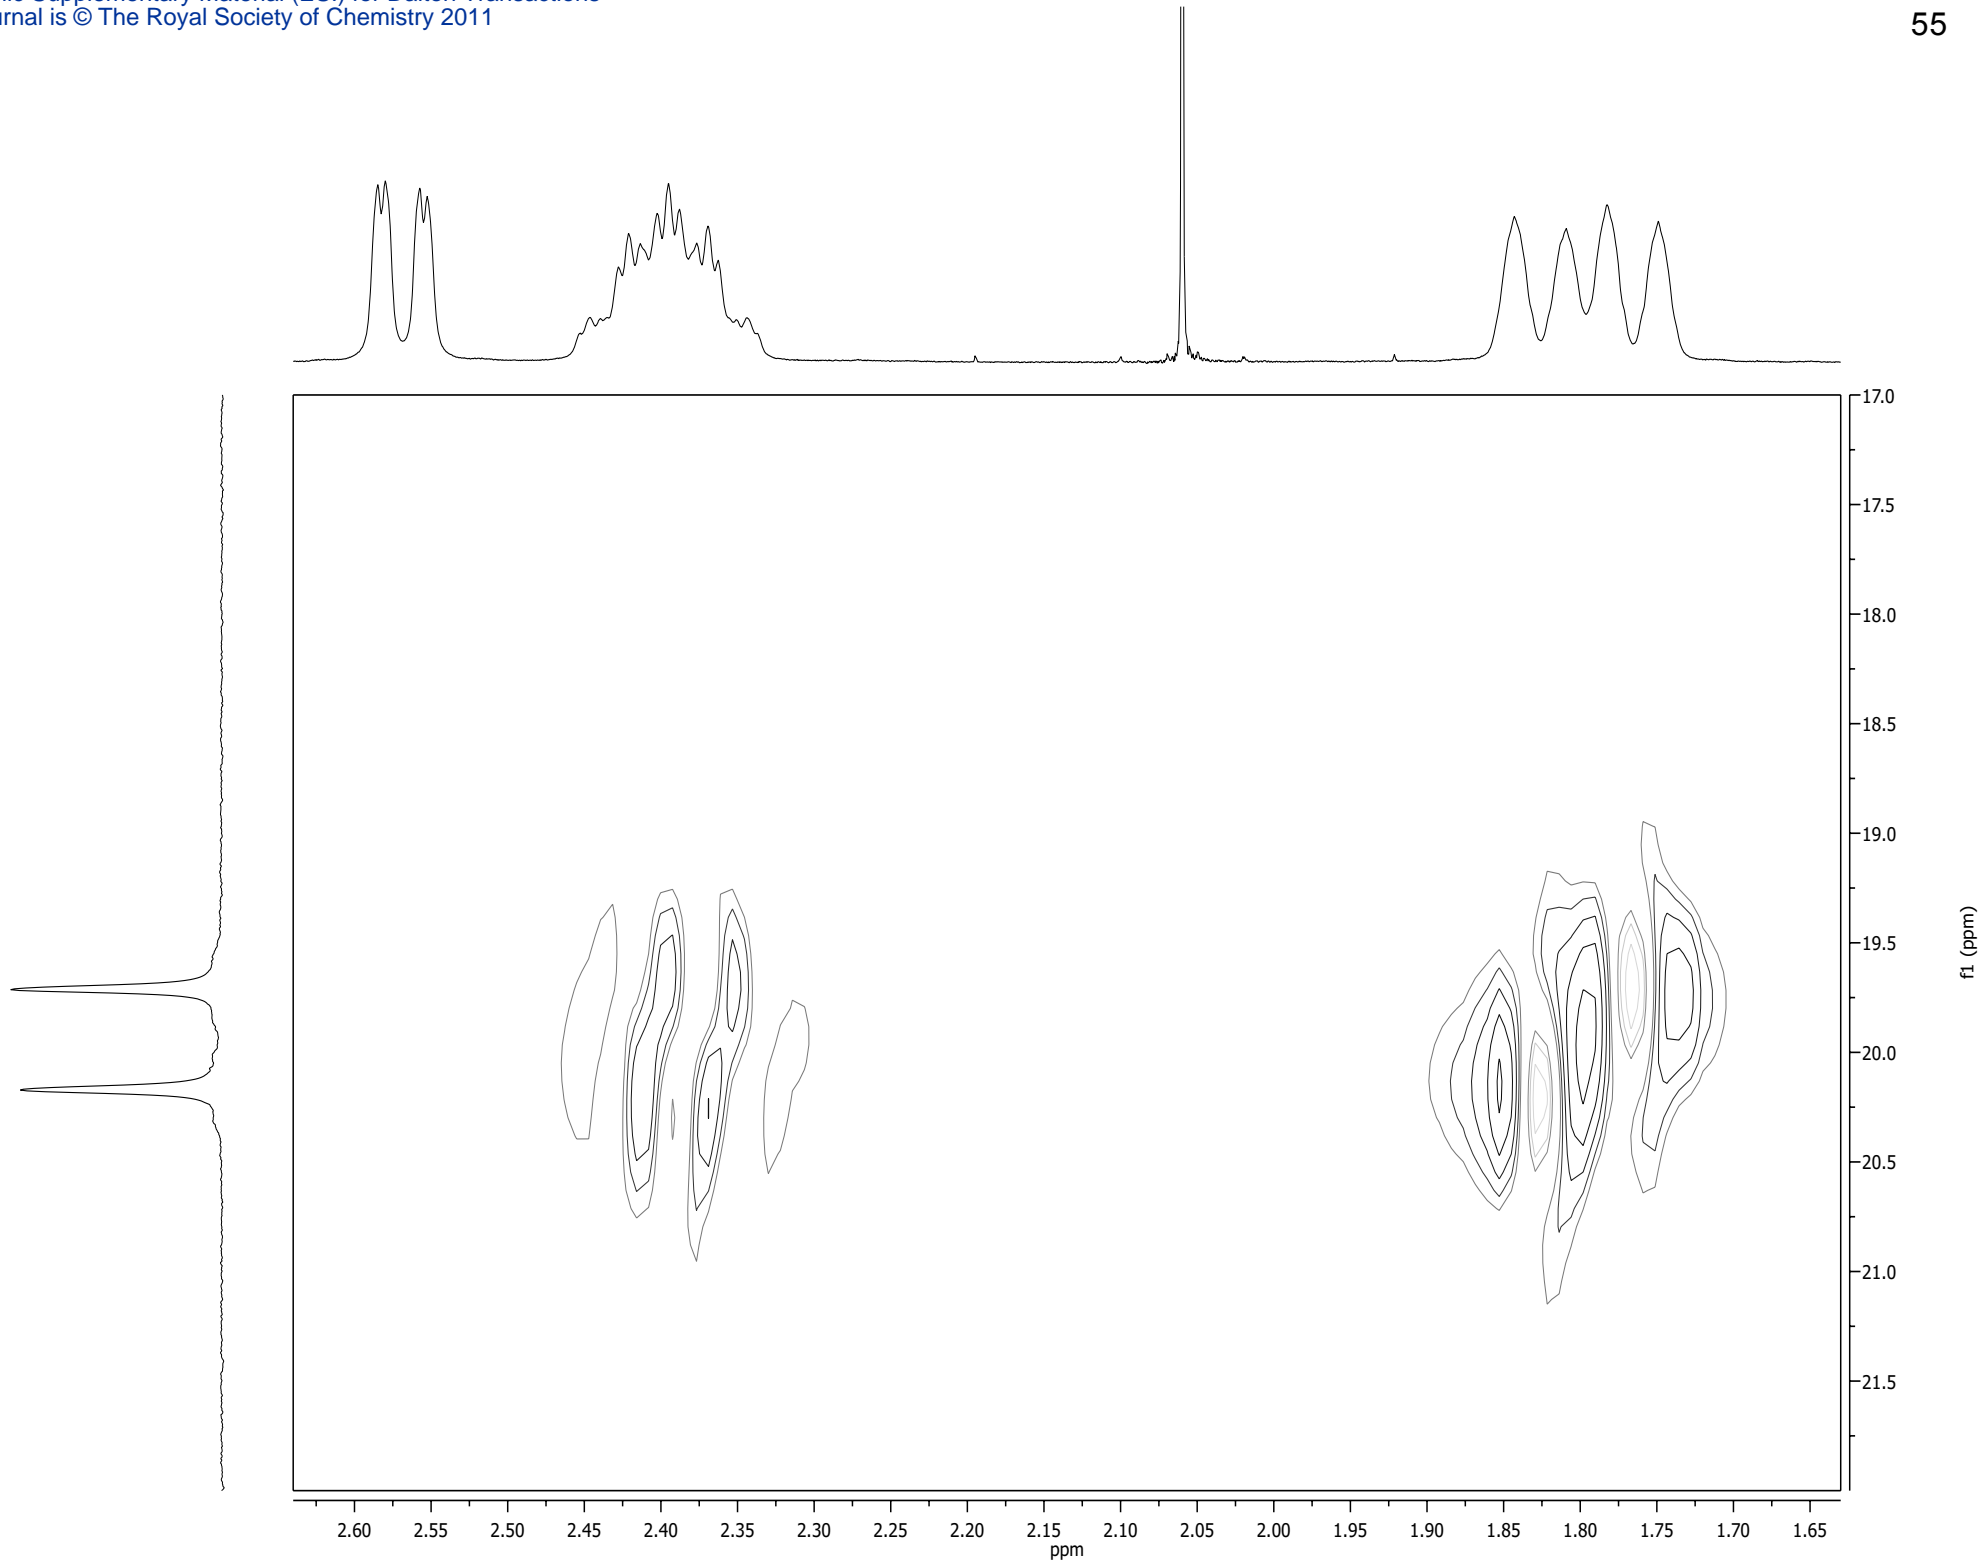

|    |                        |                     |
|----|------------------------|---------------------|
| 1  | Data File Name         | RF-CB-TE1A1P_31P    |
| 2  | Origin                 | Varian              |
| 3  | Solvent                | D2O                 |
| 4  | Number of Scans        | 512                 |
| 5  | Receiver Gain          | 60                  |
| 6  | Acquisition Time       | 1.6000              |
| 7  | Acquisition Date       | 2011-01-22T10:13:04 |
| 8  | Spectrometer Frequency | 202.30717           |
| 9  | Spectral Width         | 50600.9             |
| 10 | Lowest Frequency       | -30548.5            |
| 11 | Nucleus                | 31P                 |
| 12 | Acquired Size          | 80961               |
| 13 | Spectral Size          | 262144              |

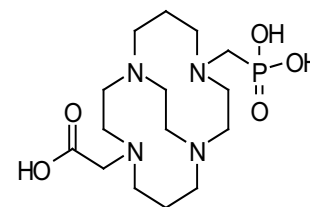

D<sub>2</sub>O, 202.31 MHz, external reference with  
85% phosphoric acid set at  $\delta$  0.00

9.240

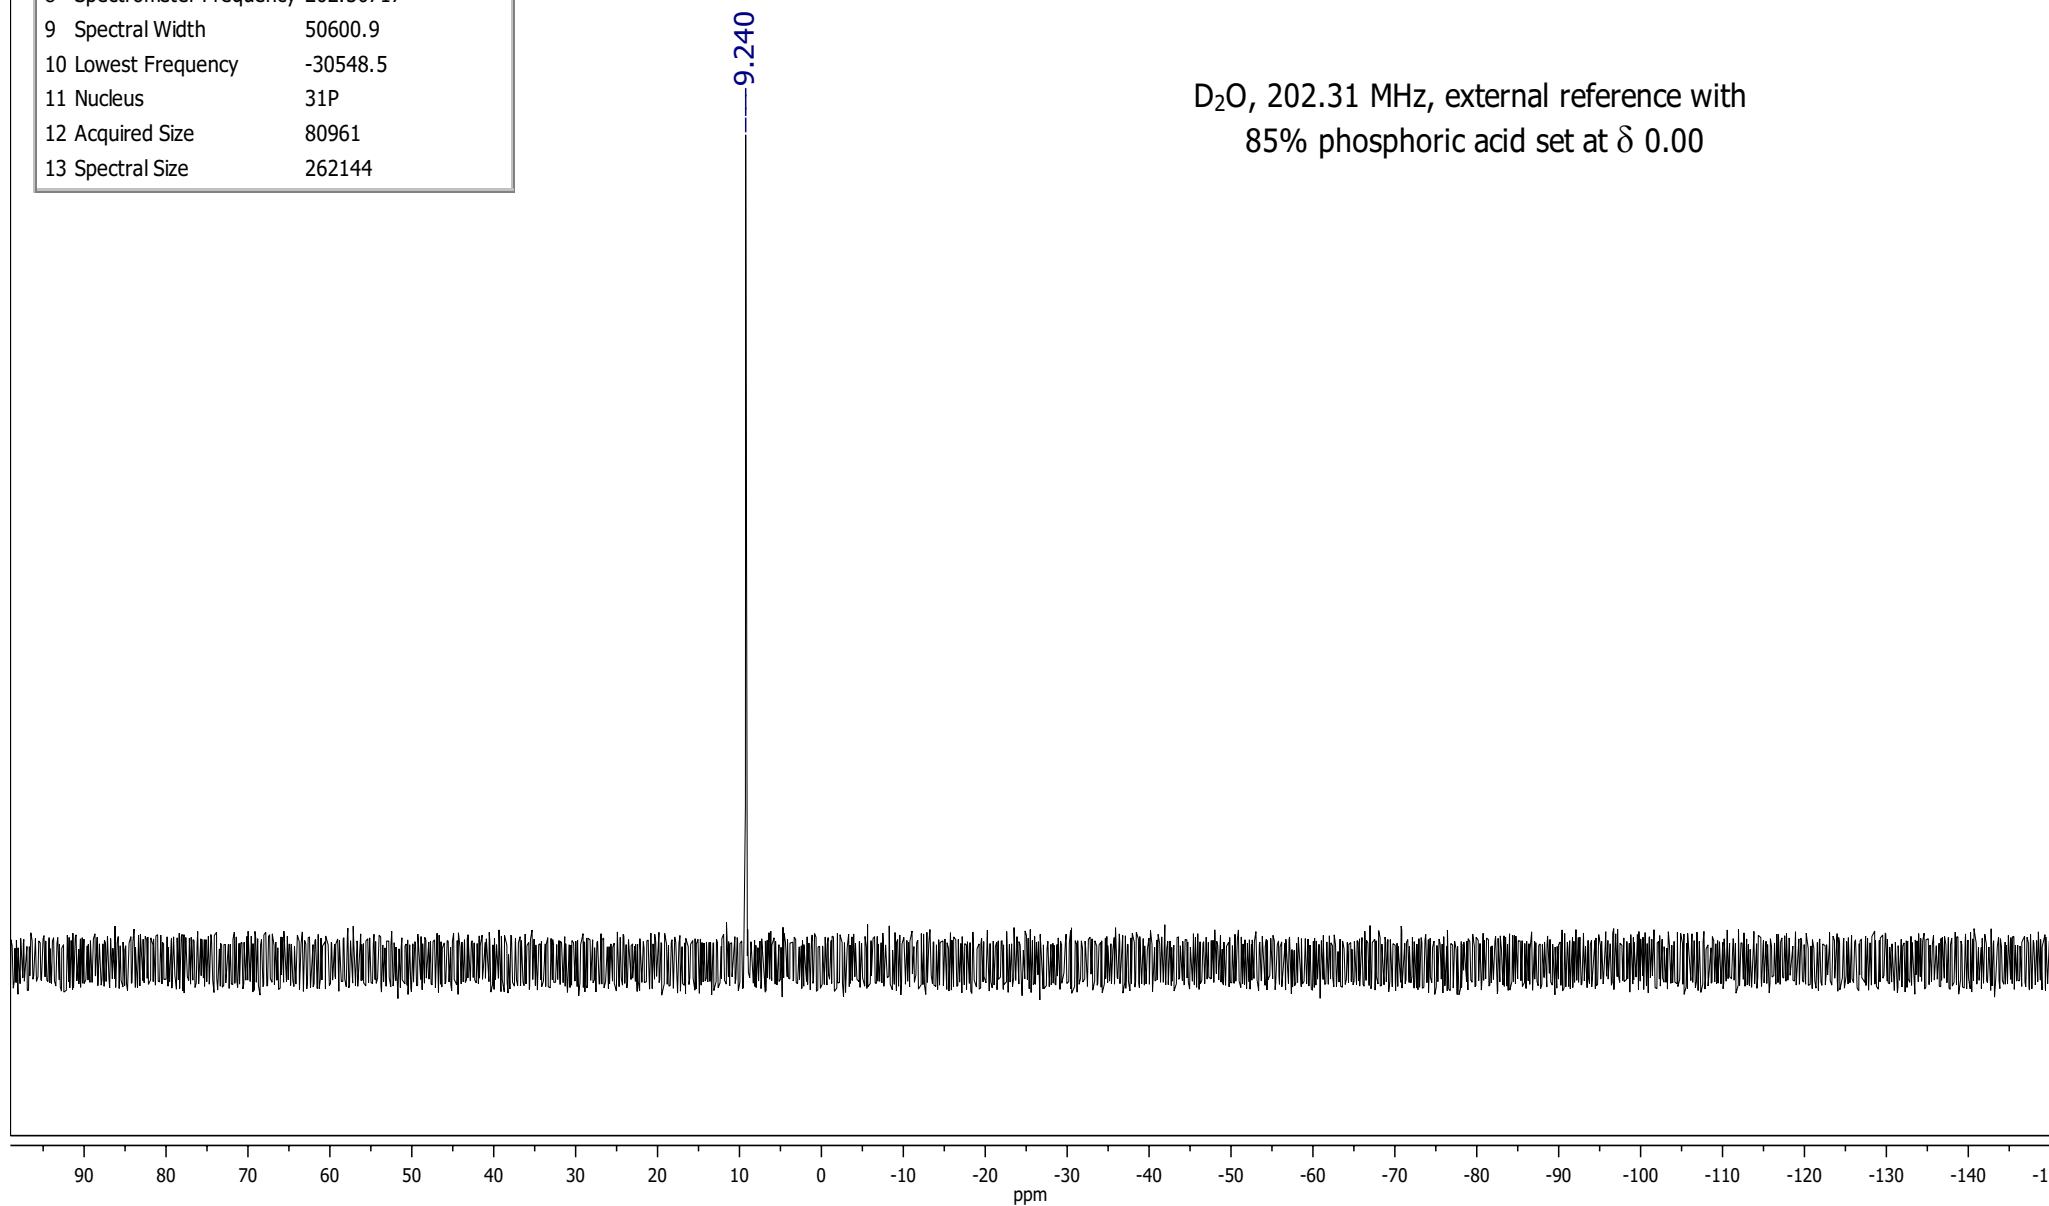

|    |                        |                                                           |
|----|------------------------|-----------------------------------------------------------|
| 1  | Data File Name         | RF-CB-TE1A1P_protected_CH2Cl2 extracts_2011-02-16/ PROTON |
| 2  | Origin                 | Varian                                                    |
| 3  | Solvent                | C6D6                                                      |
| 4  | Number of Scans        | 32                                                        |
| 5  | Receiver Gain          | 34                                                        |
| 6  | Acquisition Time       | 3.0000                                                    |
| 7  | Acquisition Date       | 2011-02-16T15:28:30                                       |
| 8  | Spectrometer Frequency | 499.77585                                                 |
| 9  | Spectral Width         | 7992.0                                                    |
| 10 | Lowest Frequency       | -1498.0                                                   |
| 11 | Nucleus                | $^1\text{H}$                                              |
| 12 | Acquired Size          | 23976                                                     |
| 13 | Spectral Size          | 65536                                                     |

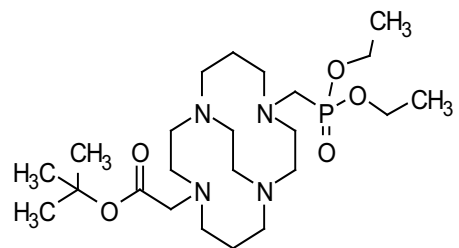

RF-CB-TE1A1P\_protected ( $\text{CH}_2\text{Cl}_2$  extracts)  
 $\text{C}_6\text{D}_6$ , 499.78 MHz, internal reference set to TMS at  $\delta$  0.00  
Sample was dried over  $\text{Na}_2\text{SO}_4$  prior to running NMR

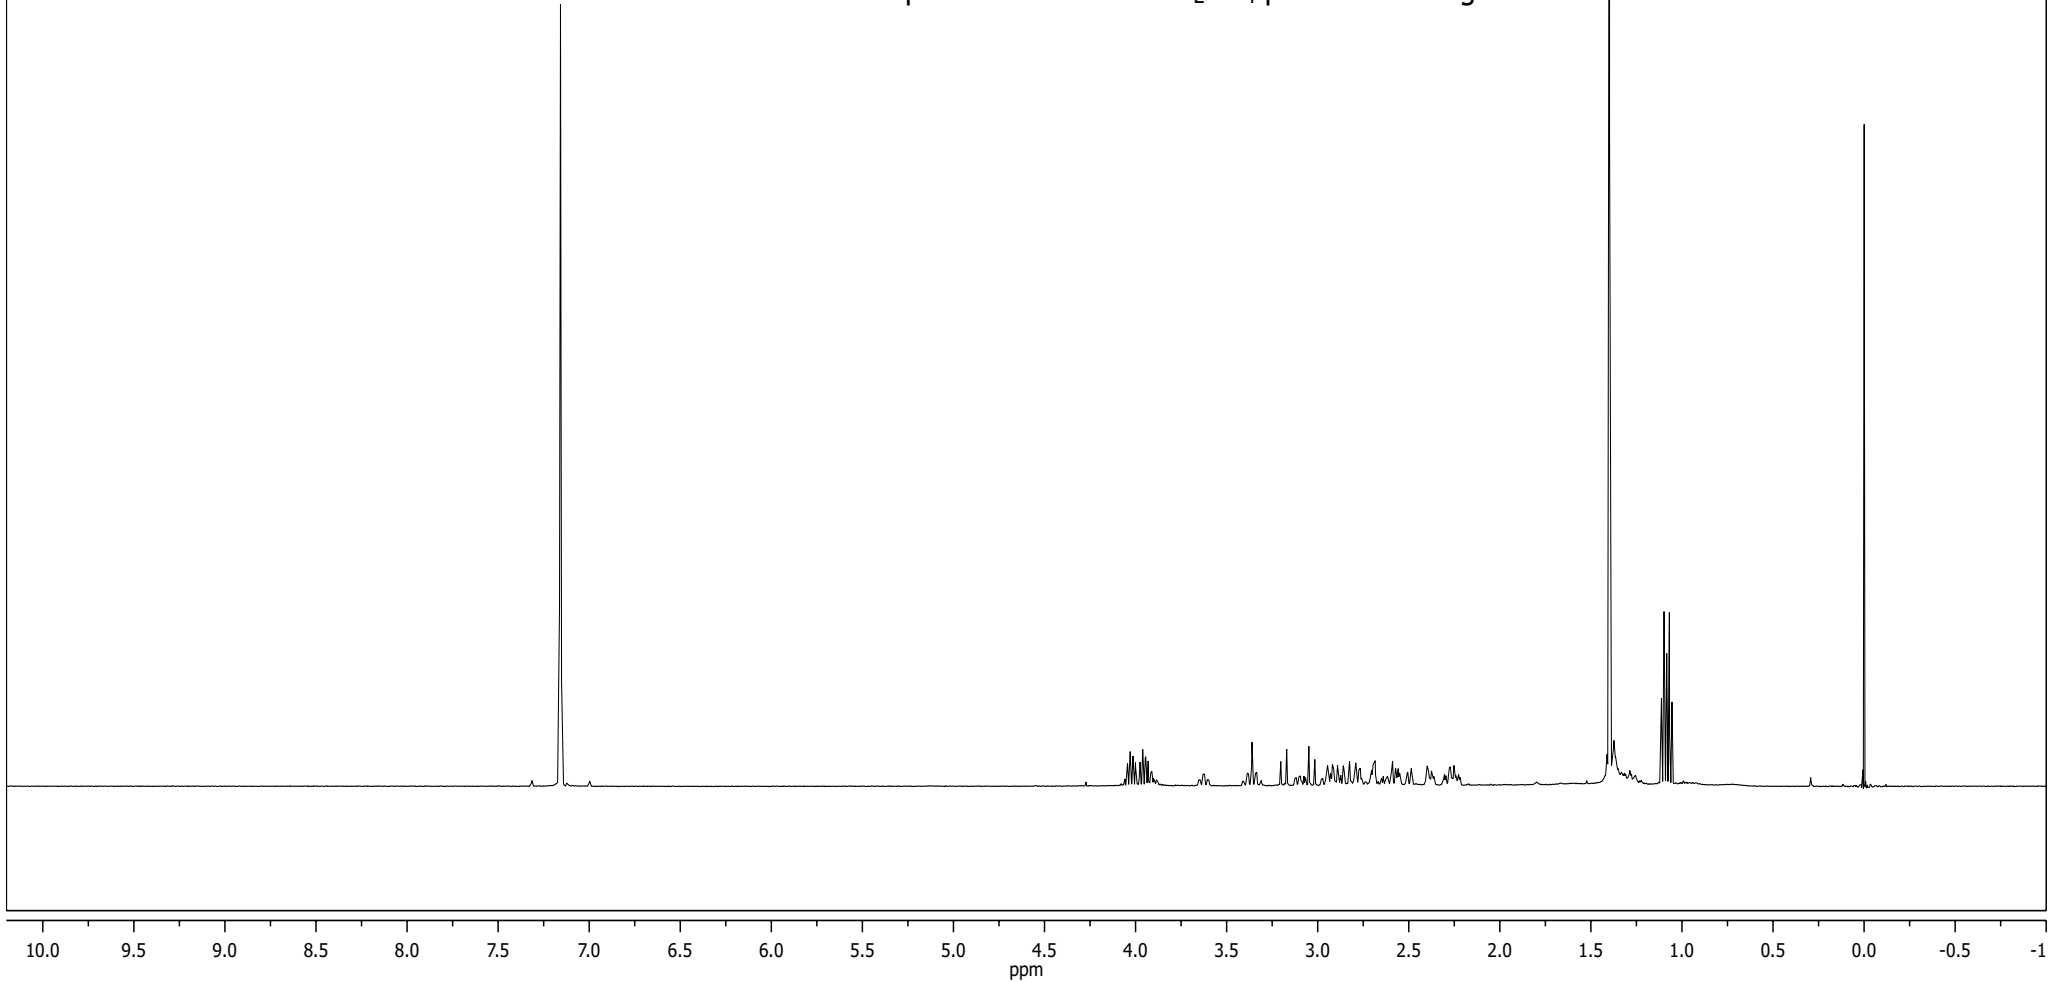

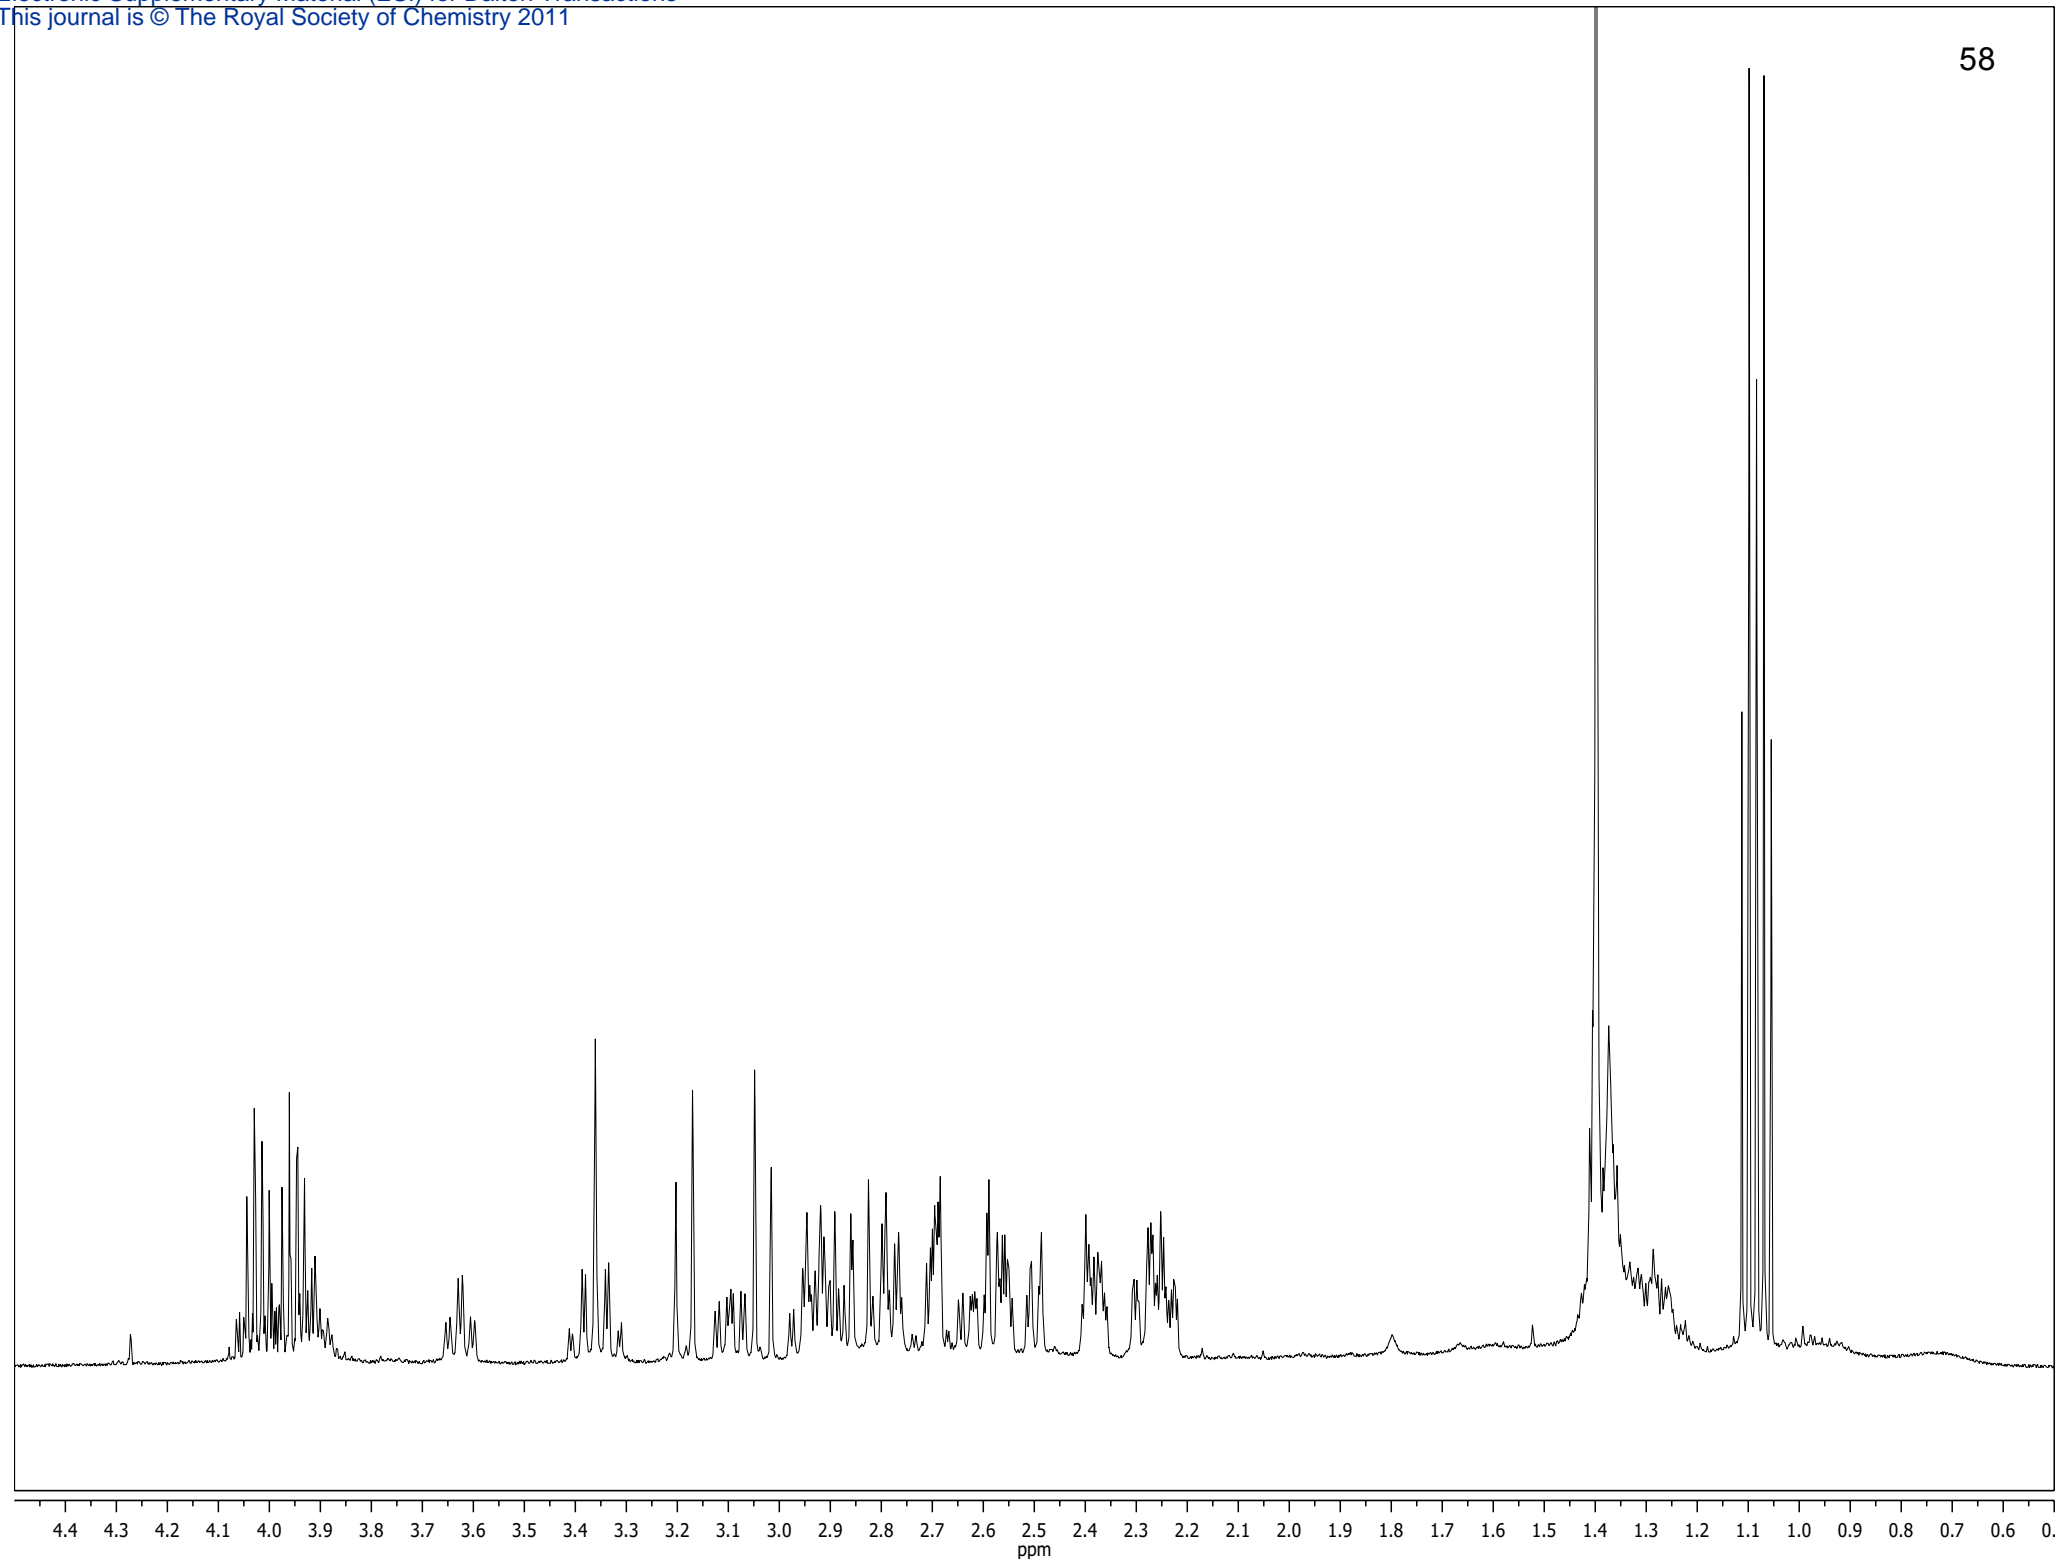

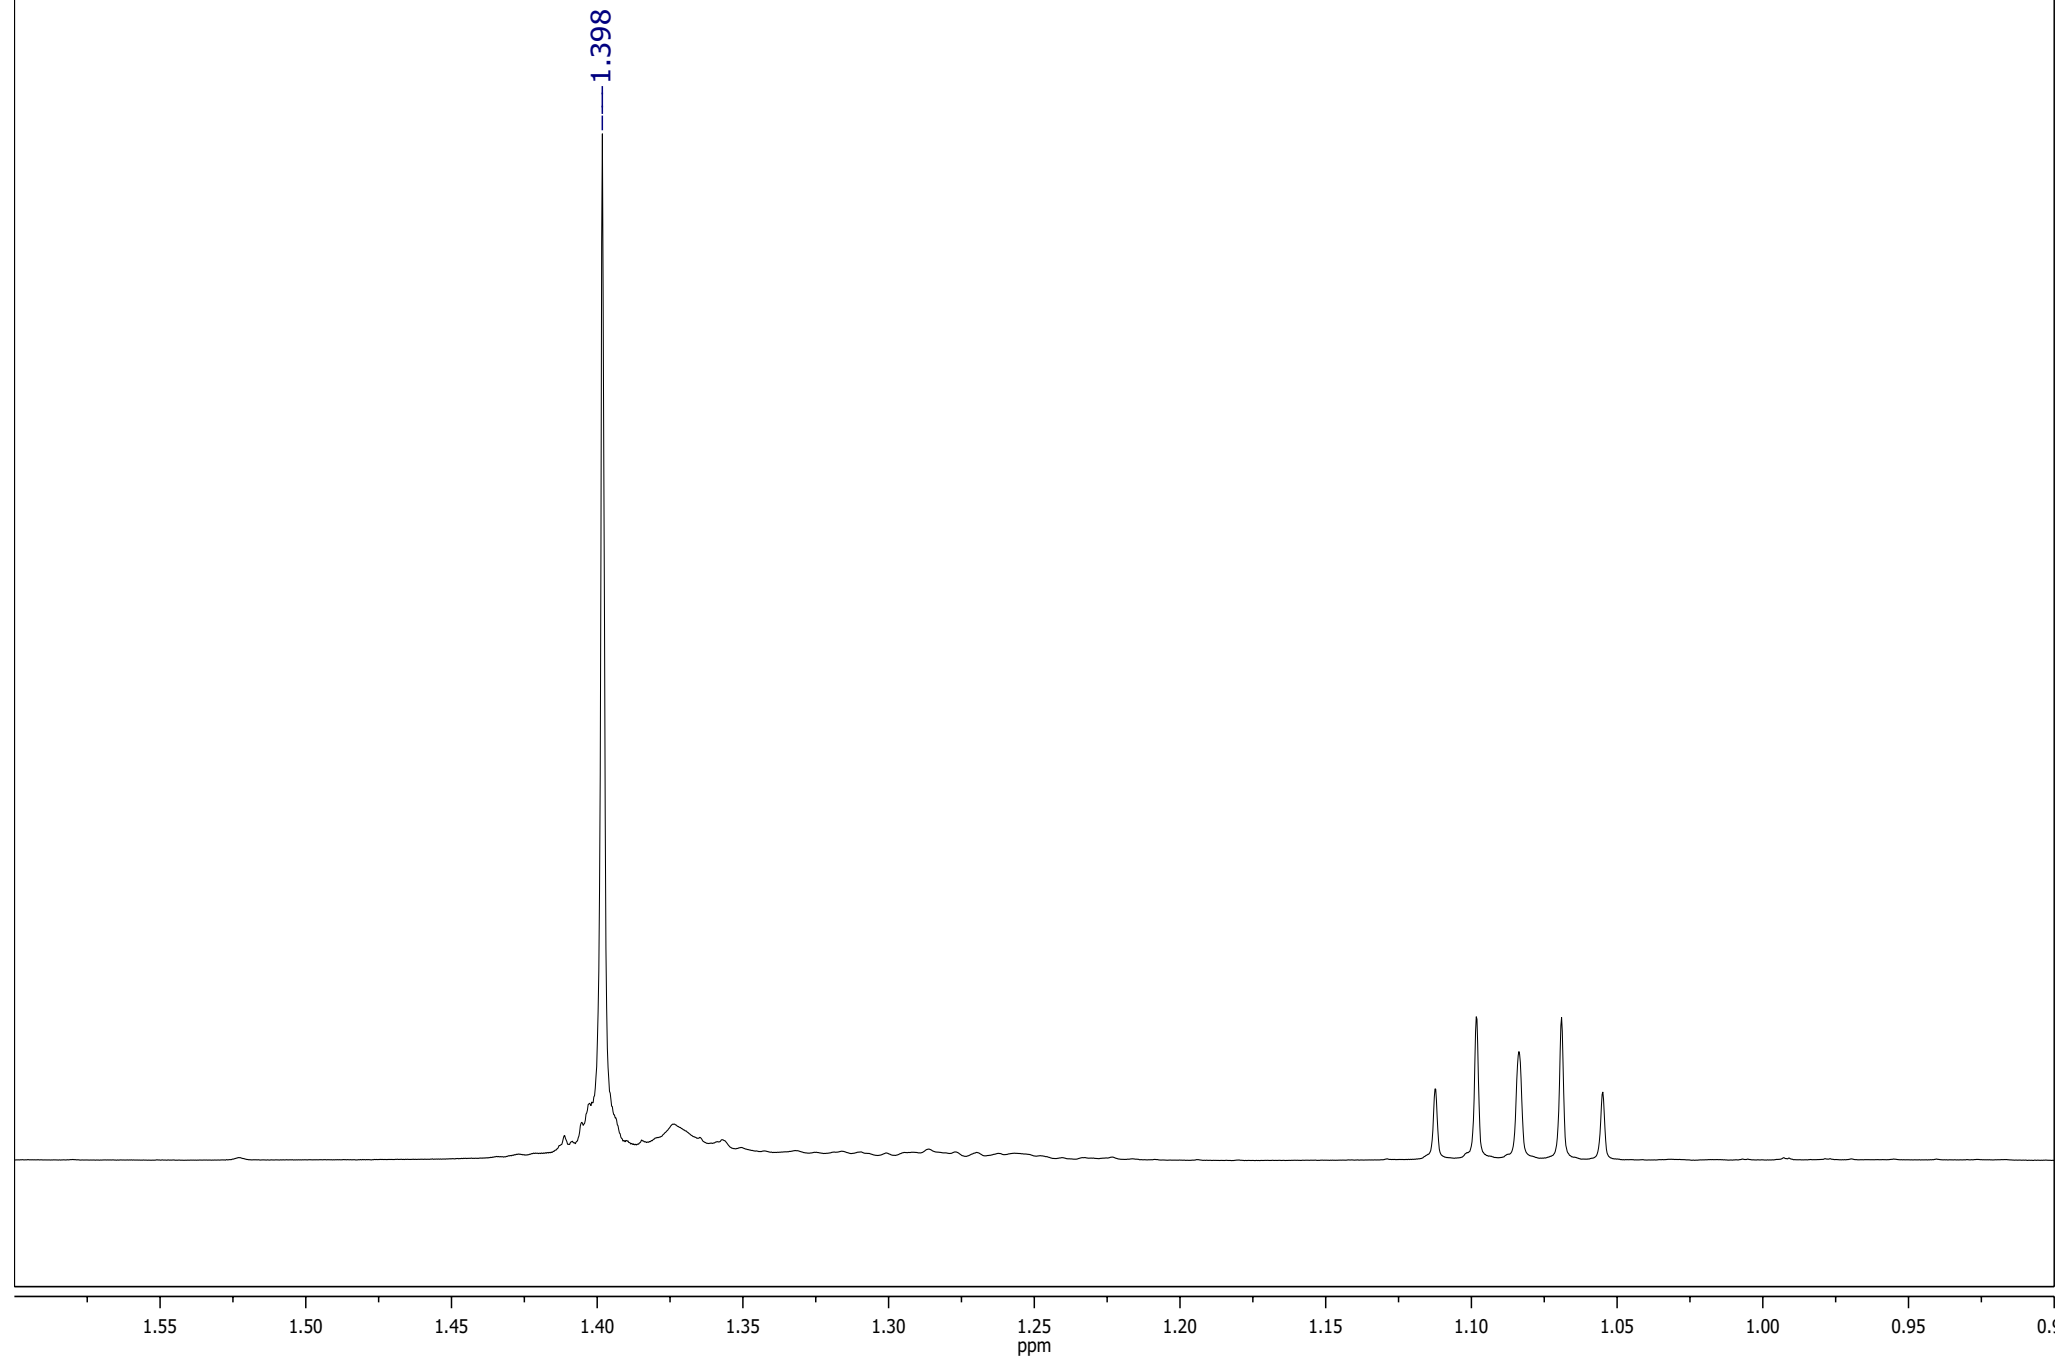

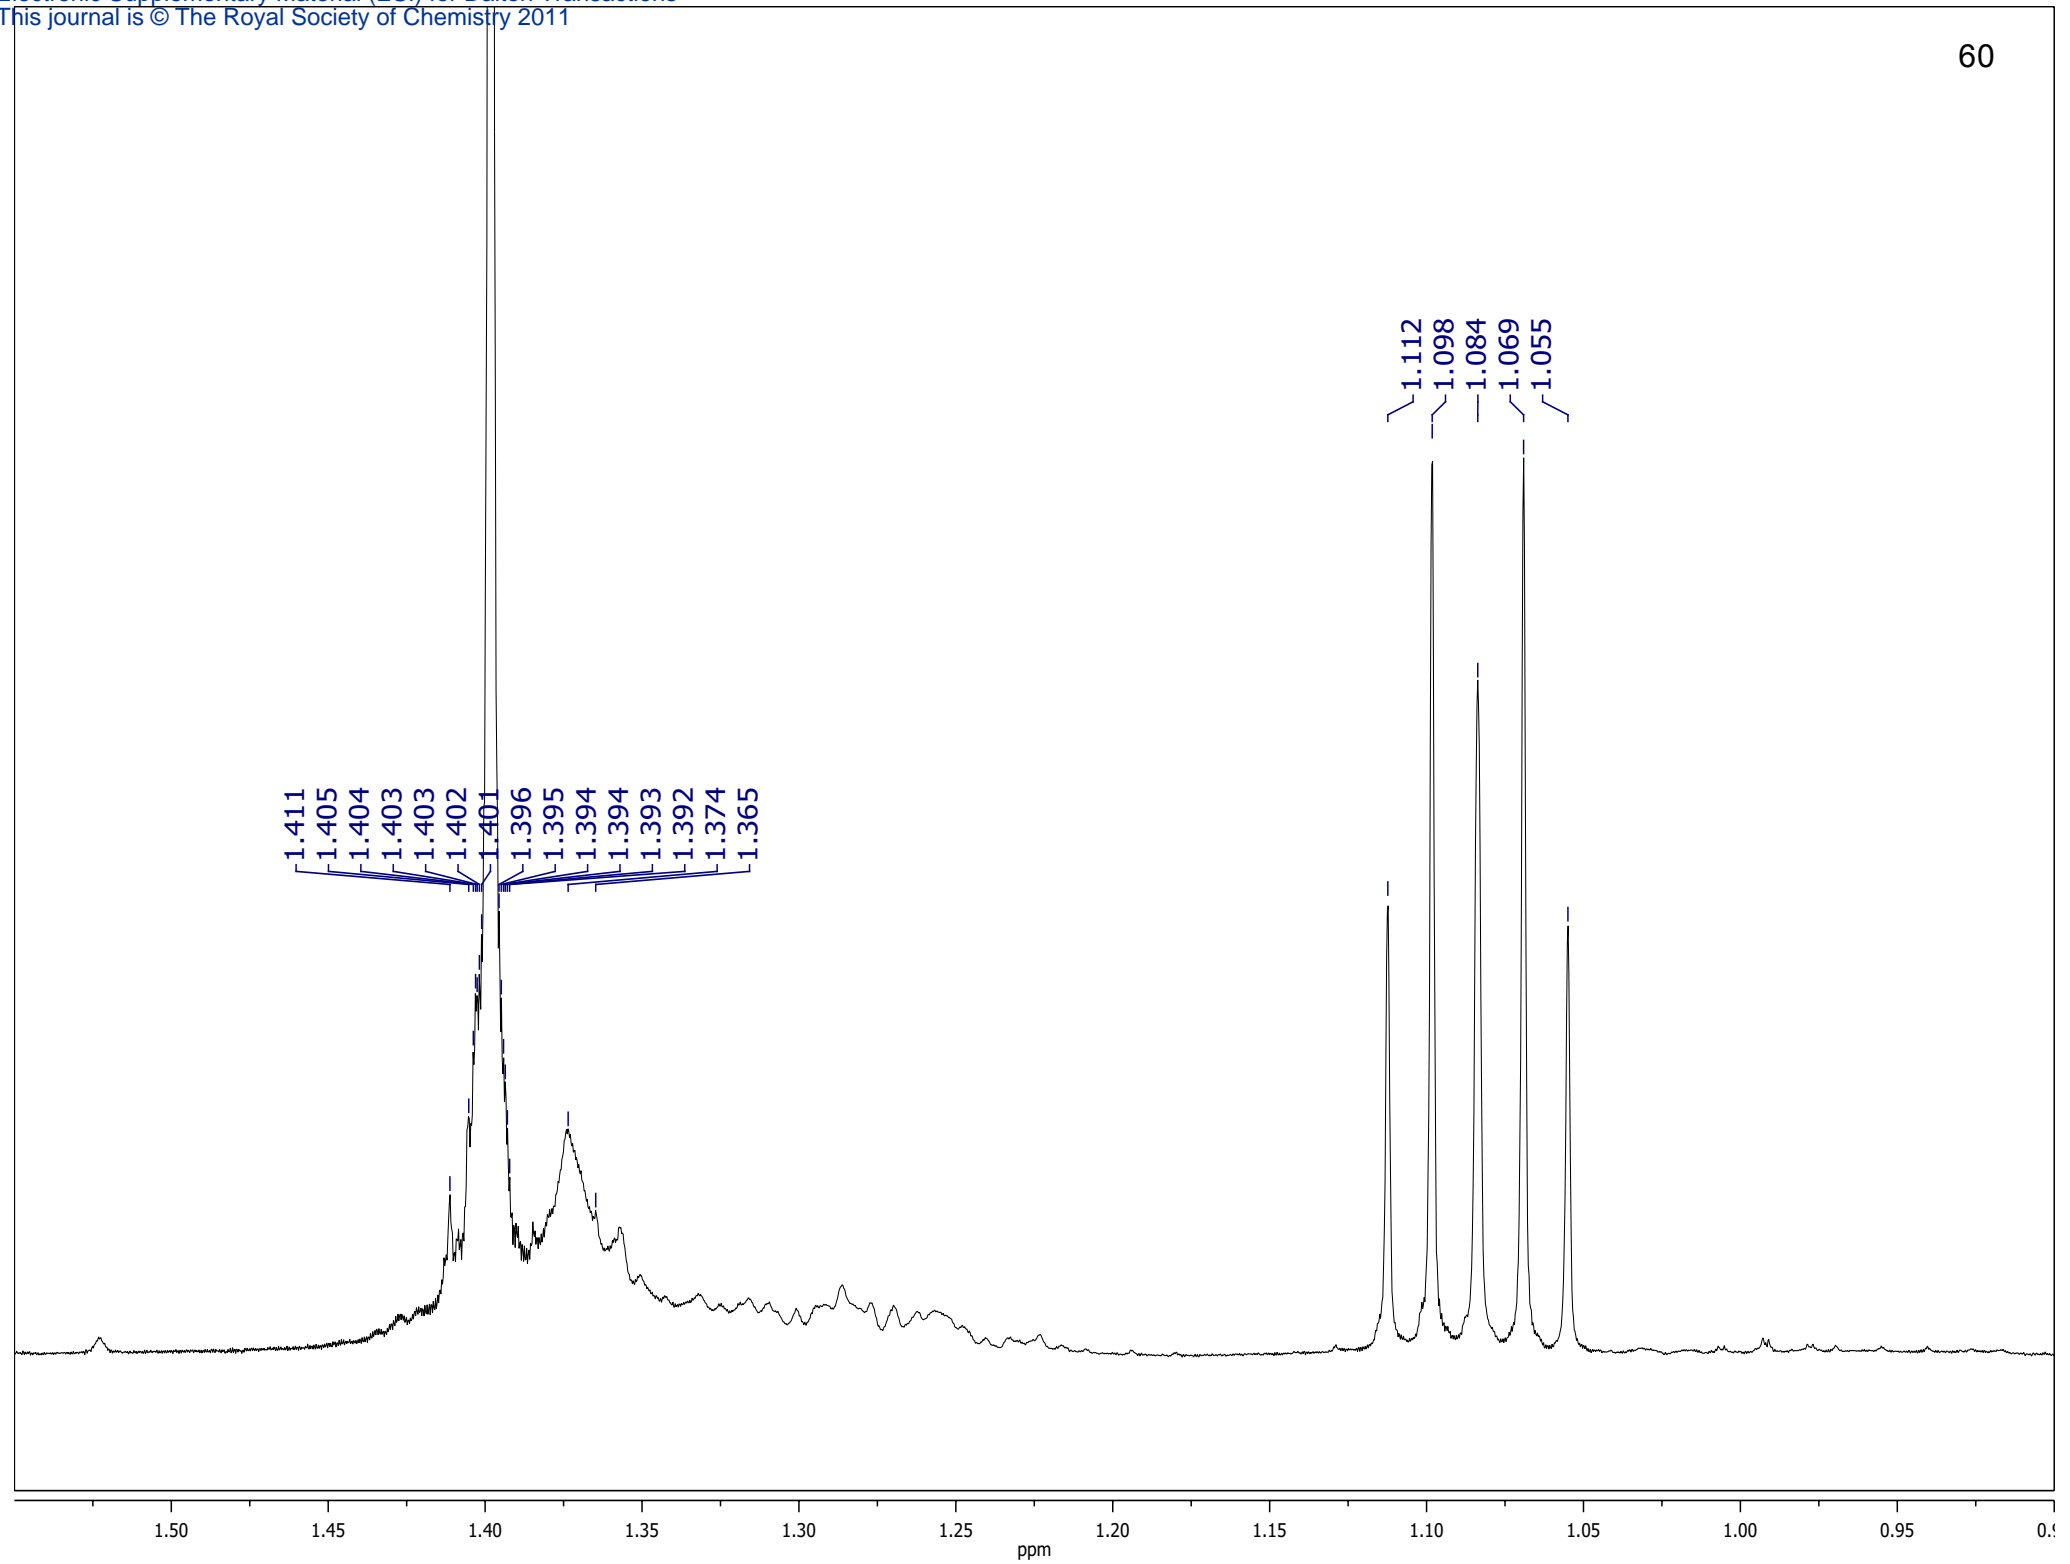

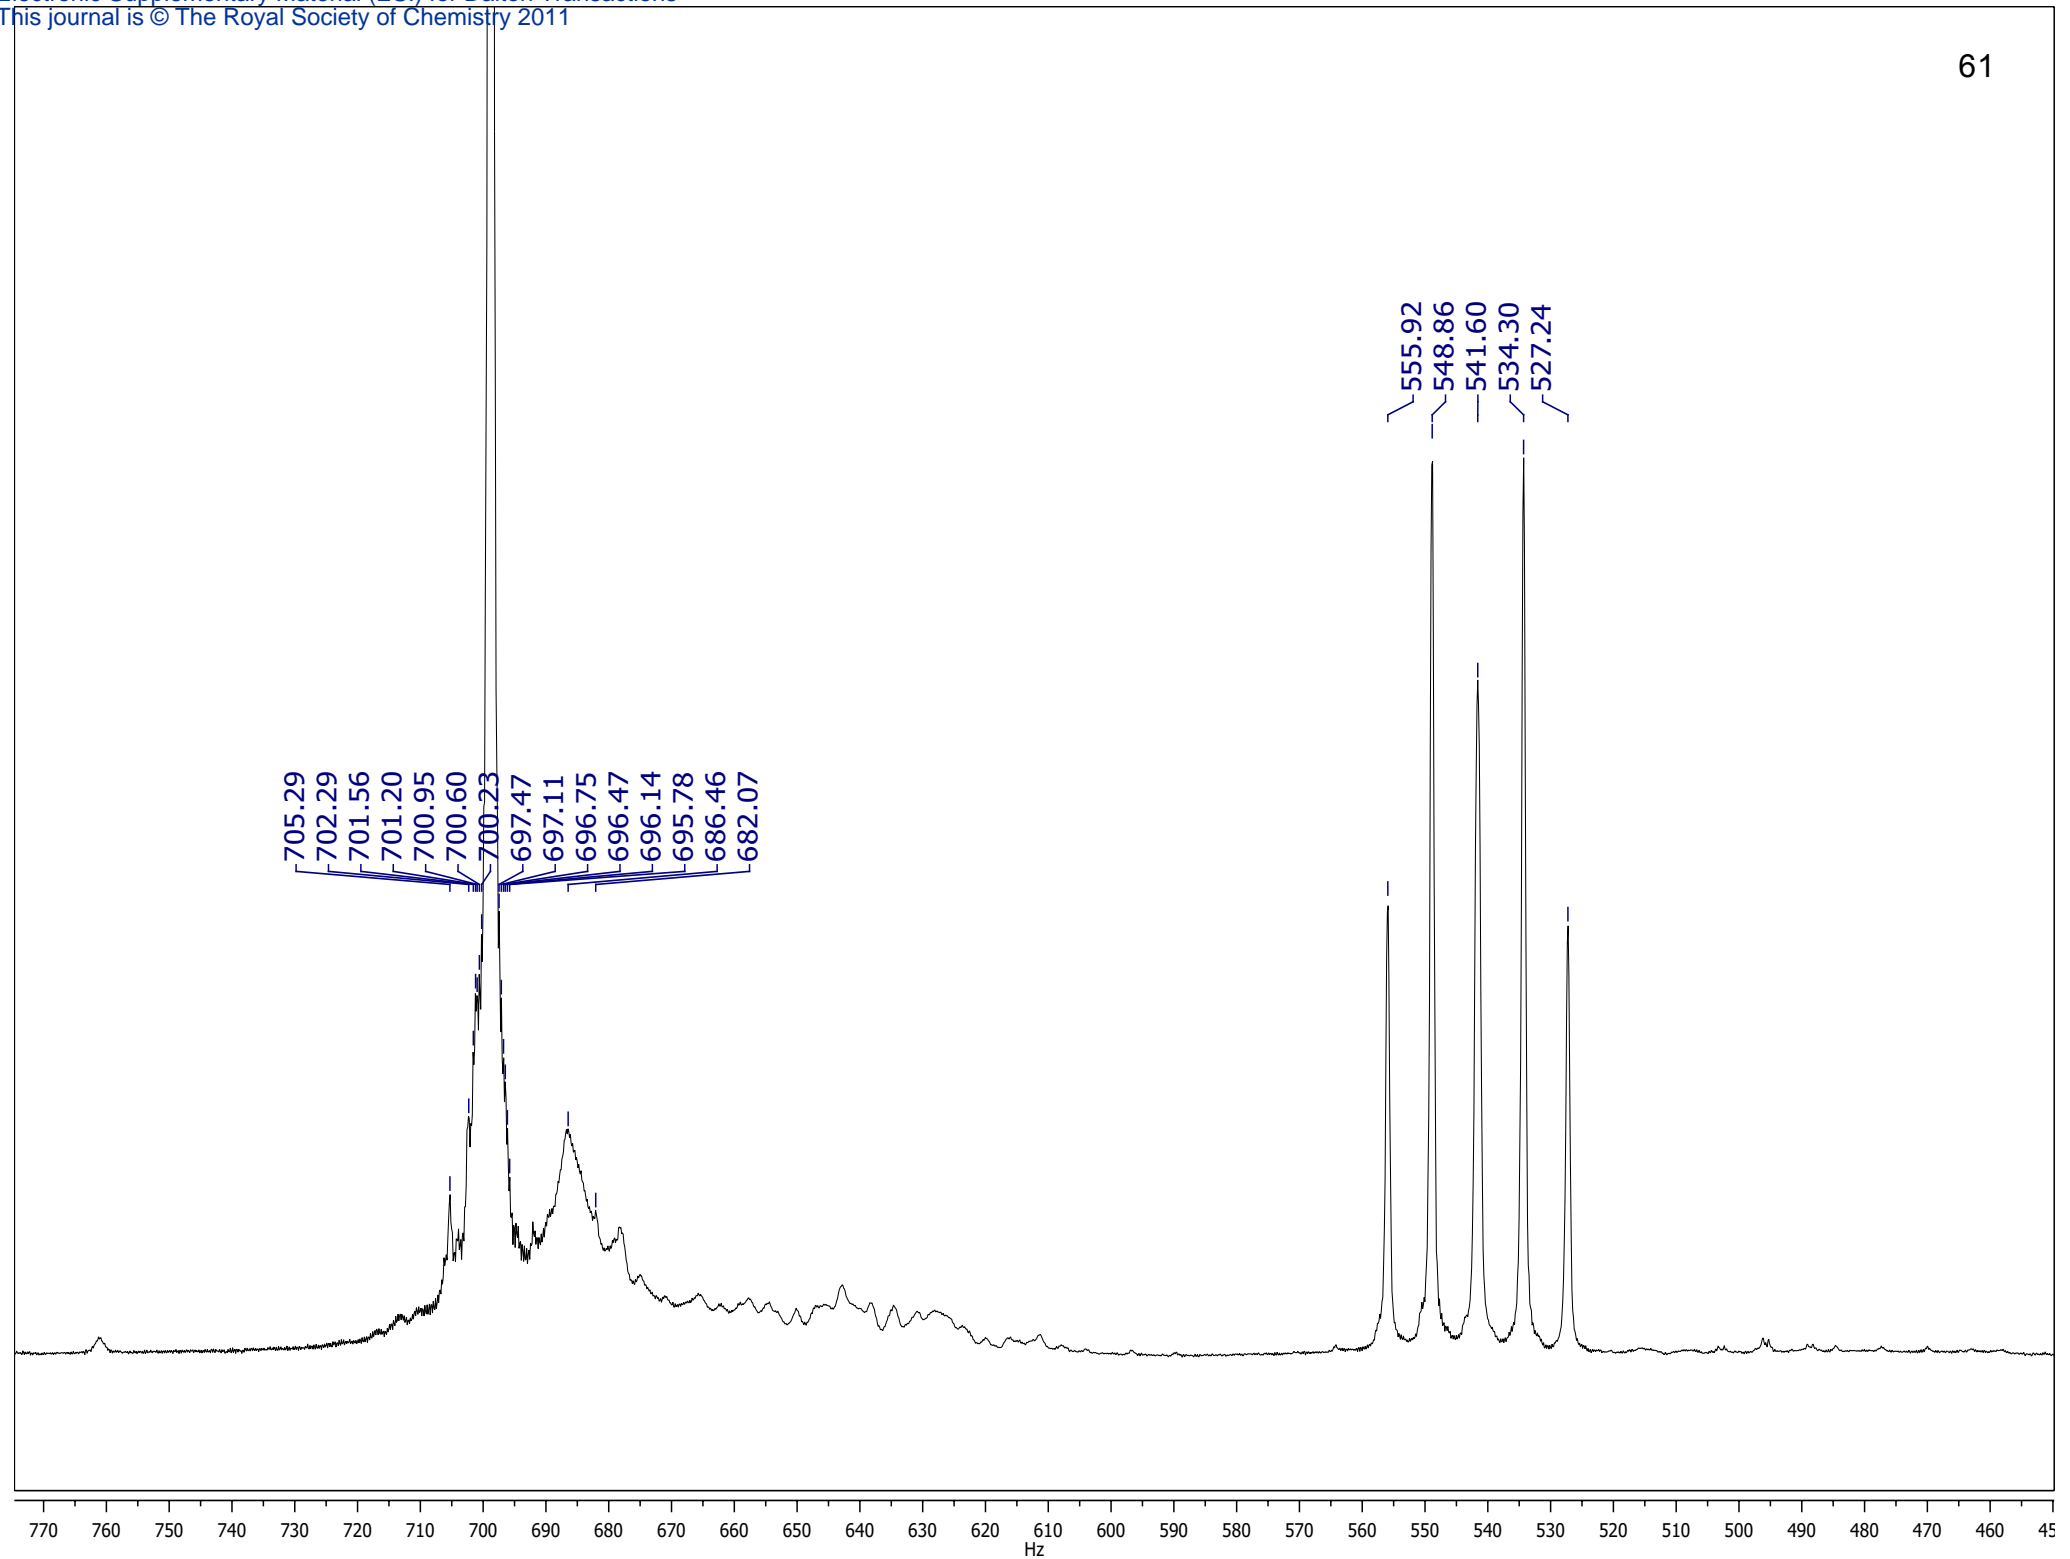

Region of interest: 2.17 - 3.26 ppm

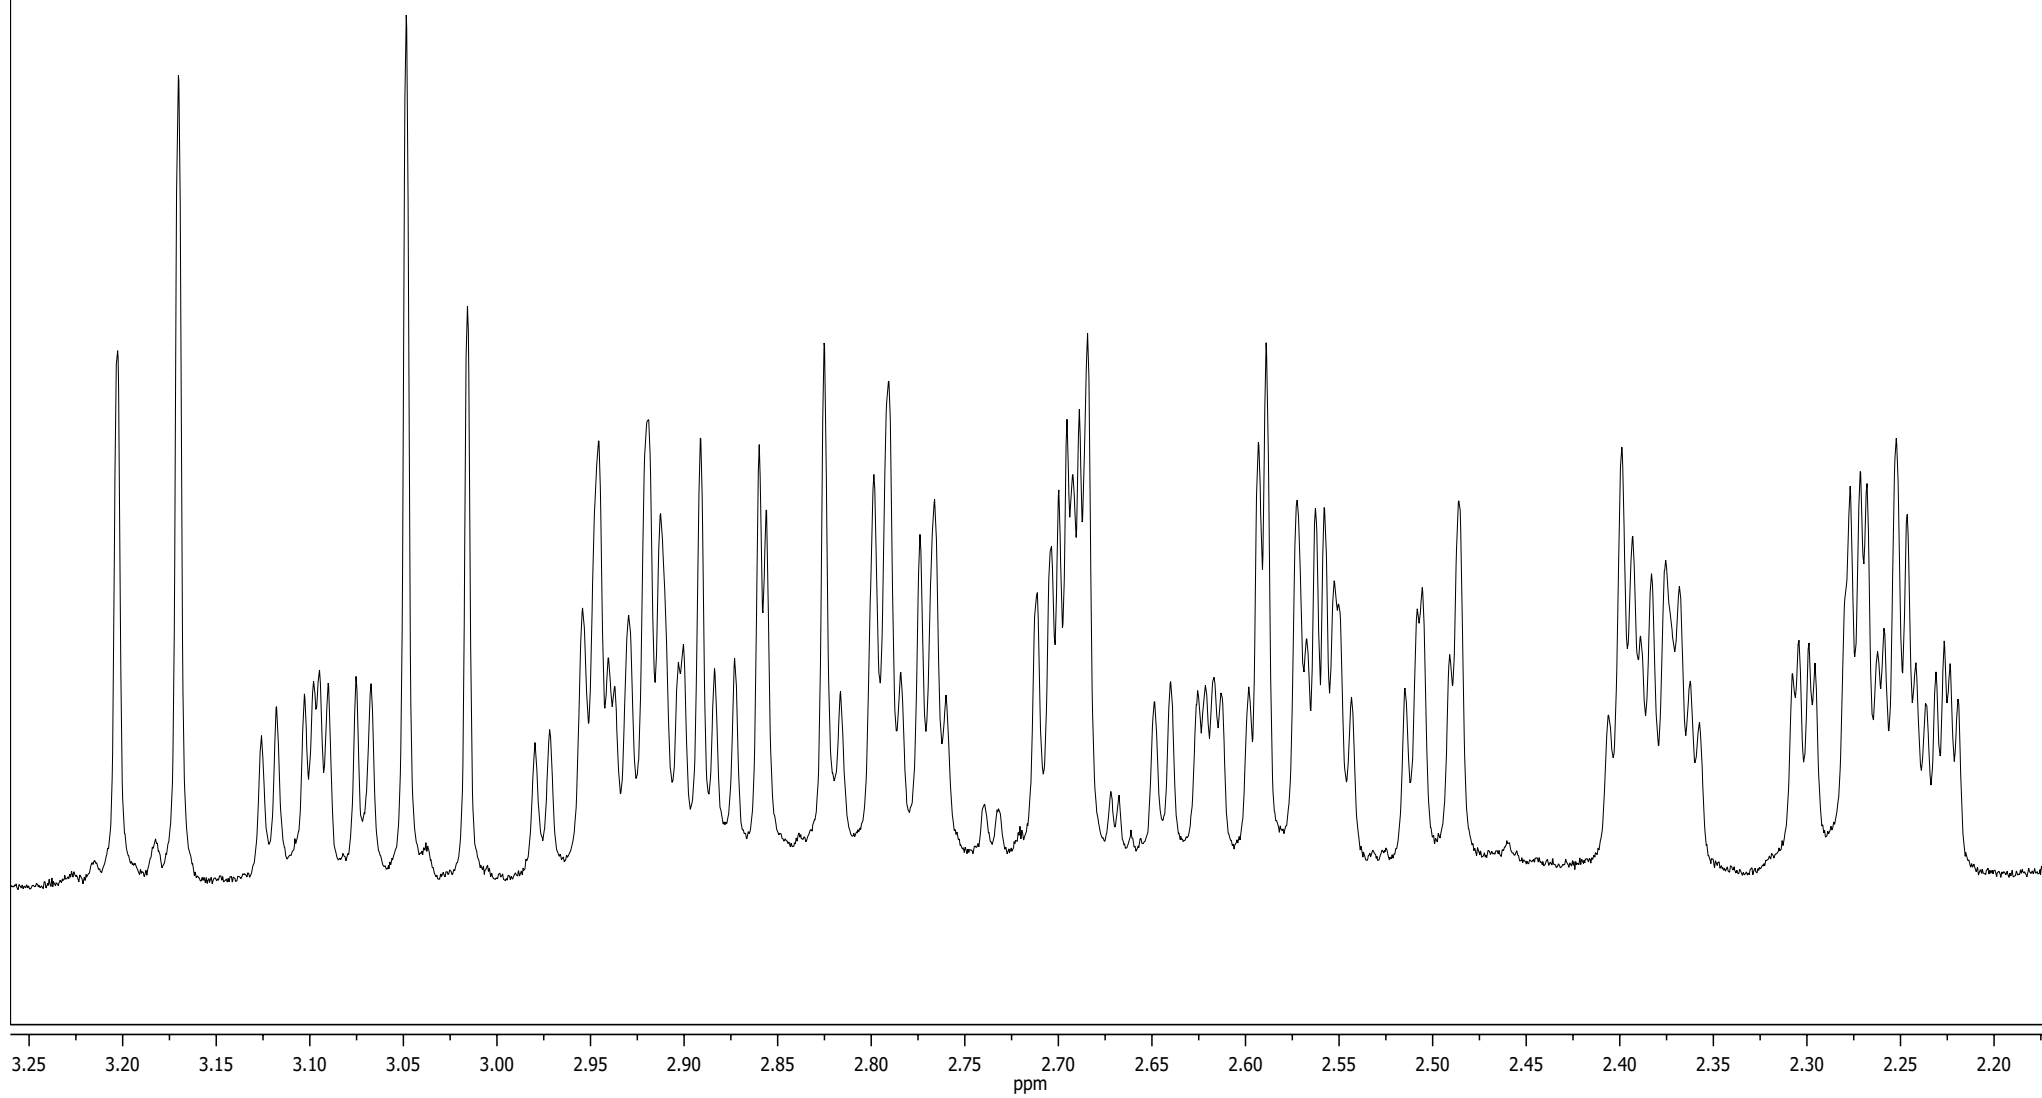

Region of interest: 2.44 - 3.00 ppm

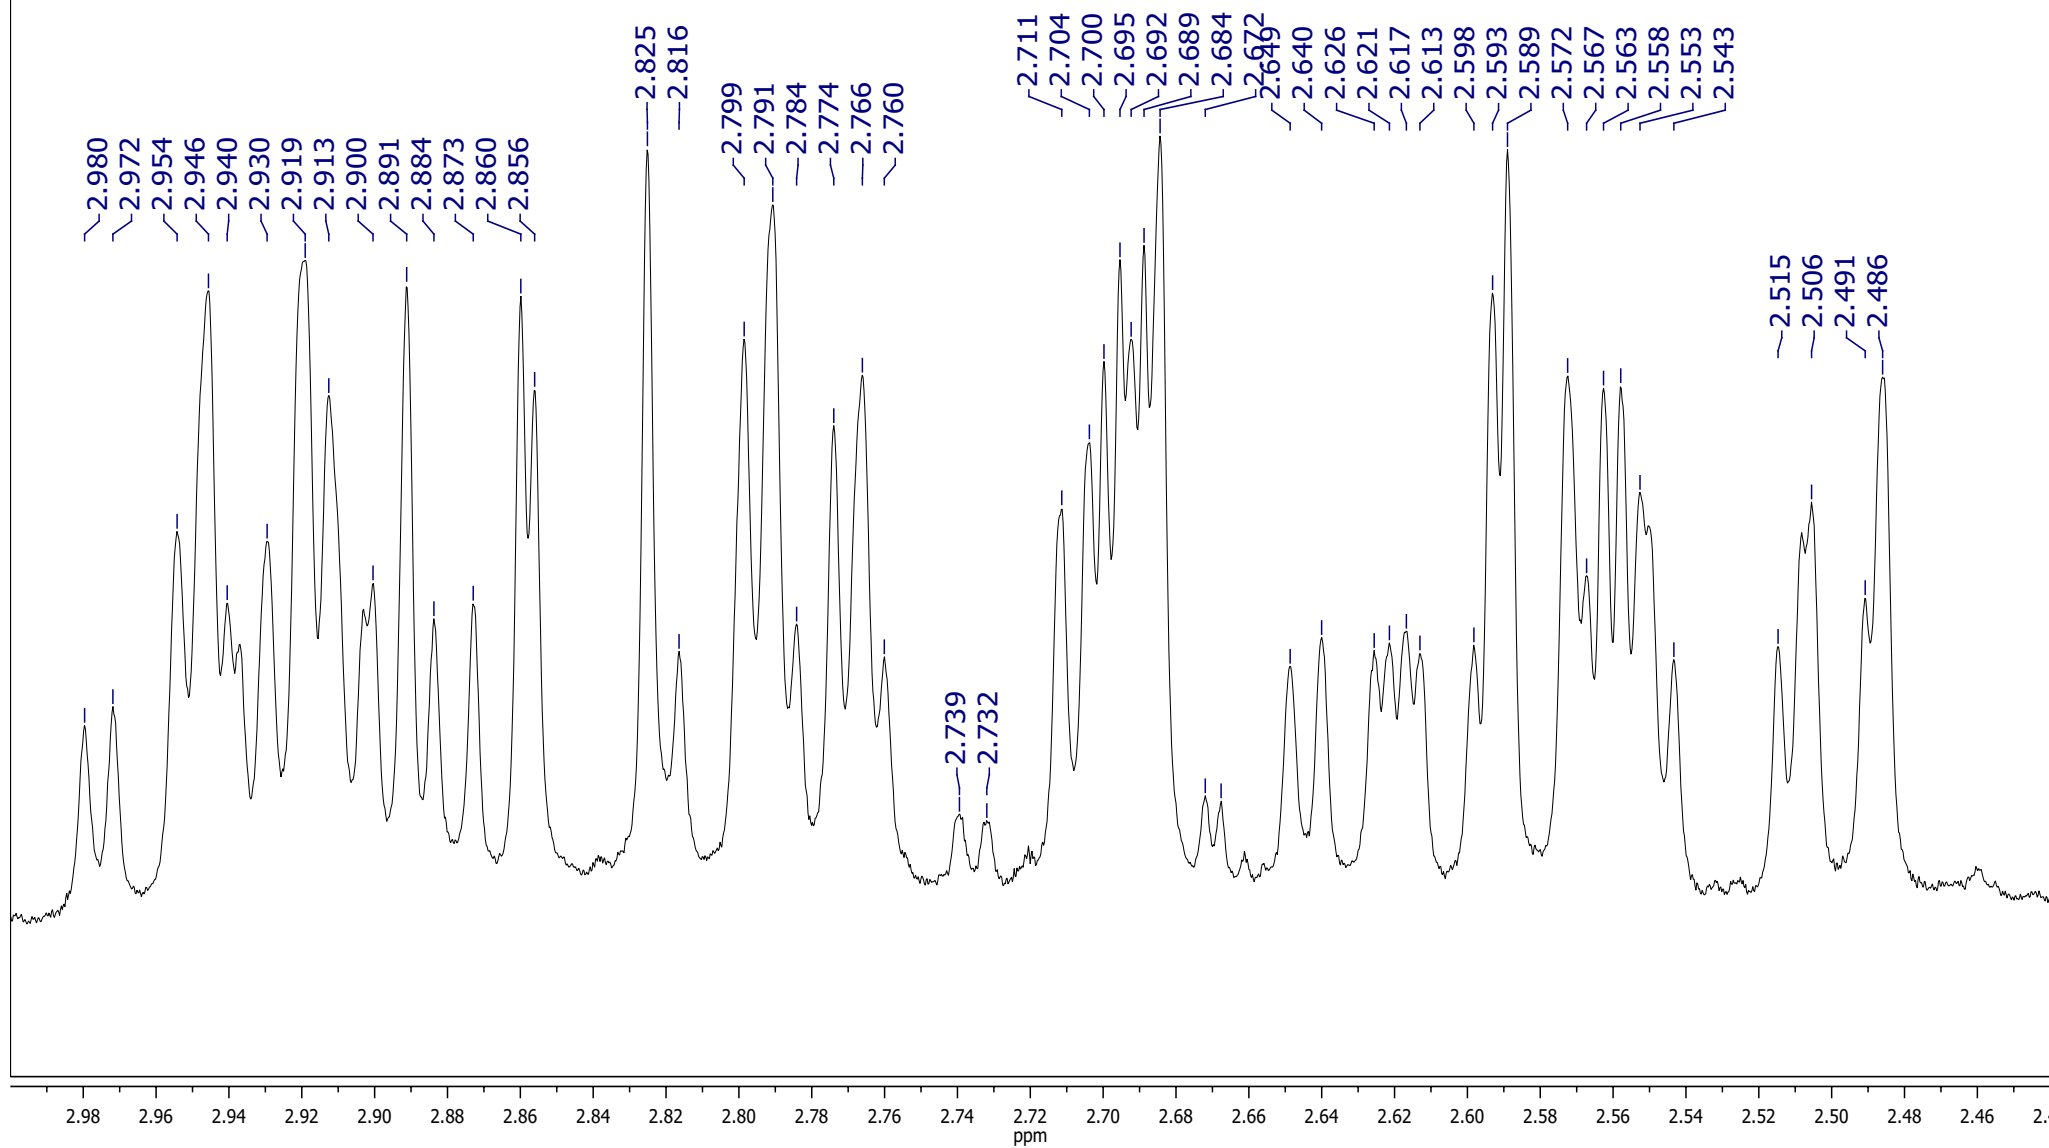

Region of interest: 2.44 - 3.00 ppm



Region of interest: 2.44- 3.00 ppm

Exponential: -1.32

Gaussian: 0.70 GB

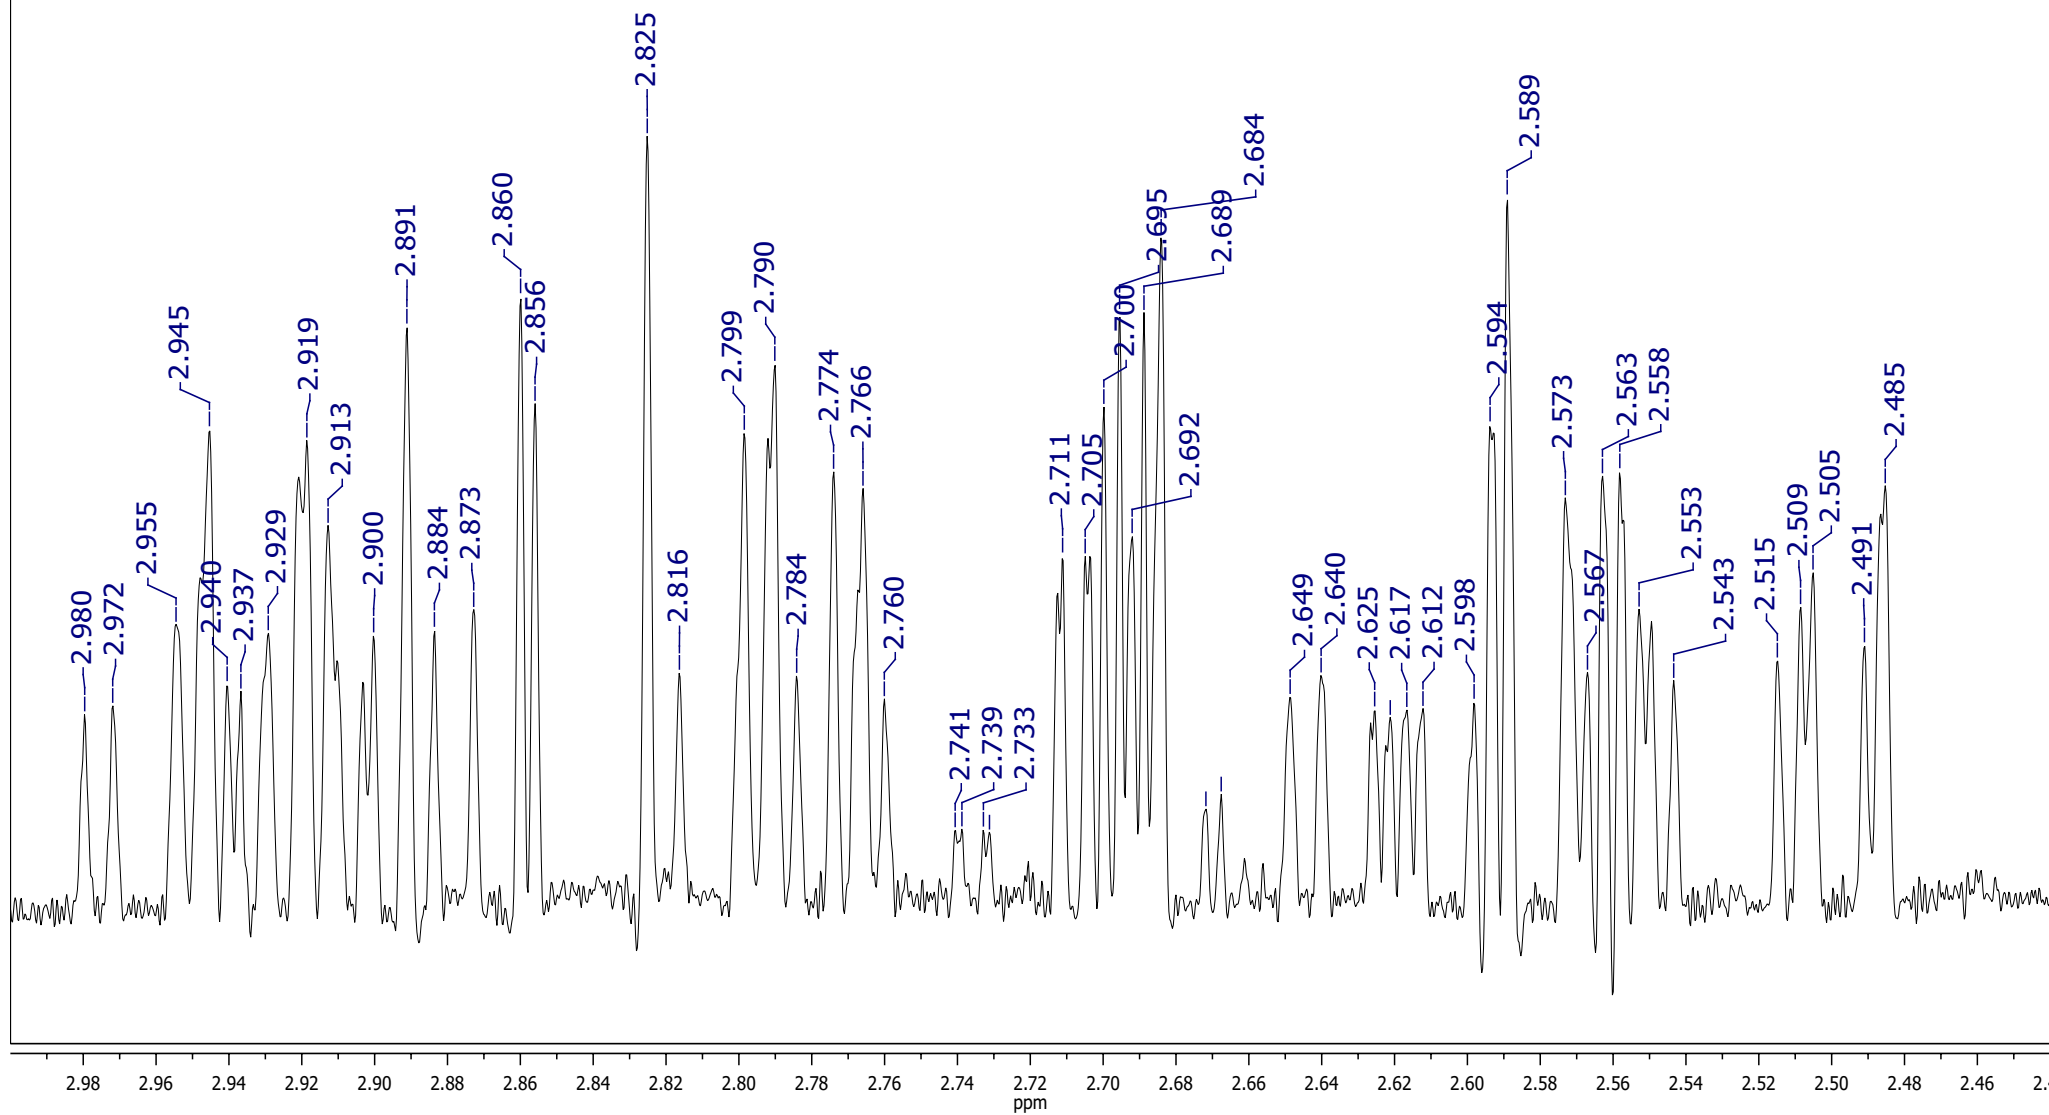

Region of interest: 2.44- 3.00 ppm

Exponential: -1.32

Gaussian: 0.70 GB

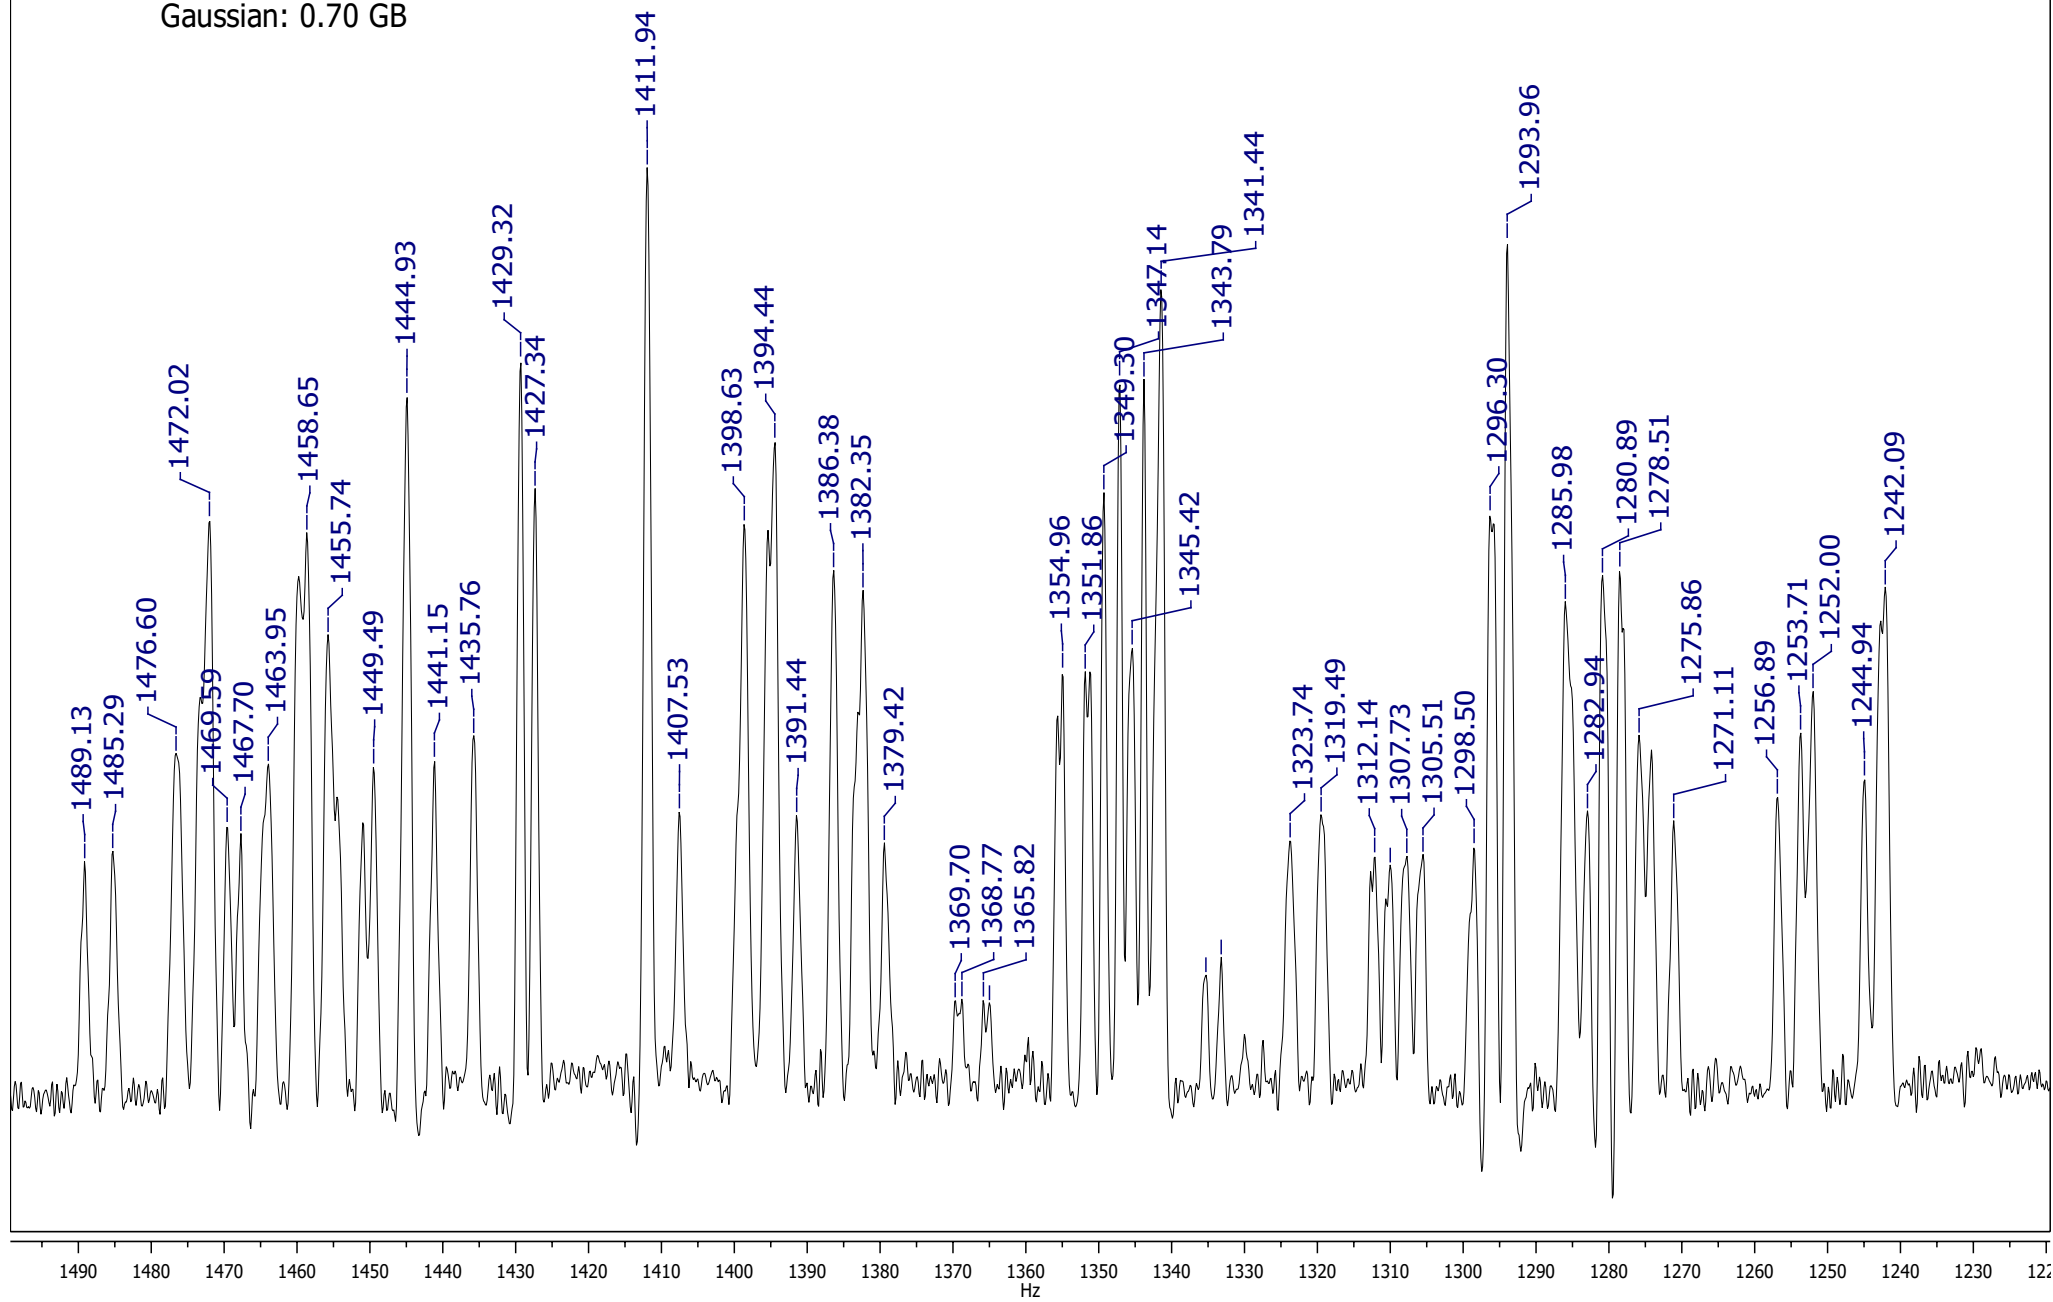

Region of interest: 2.99- 3.50 ppm

Exponential: -1.32  
Gaussian: -1.00 GB

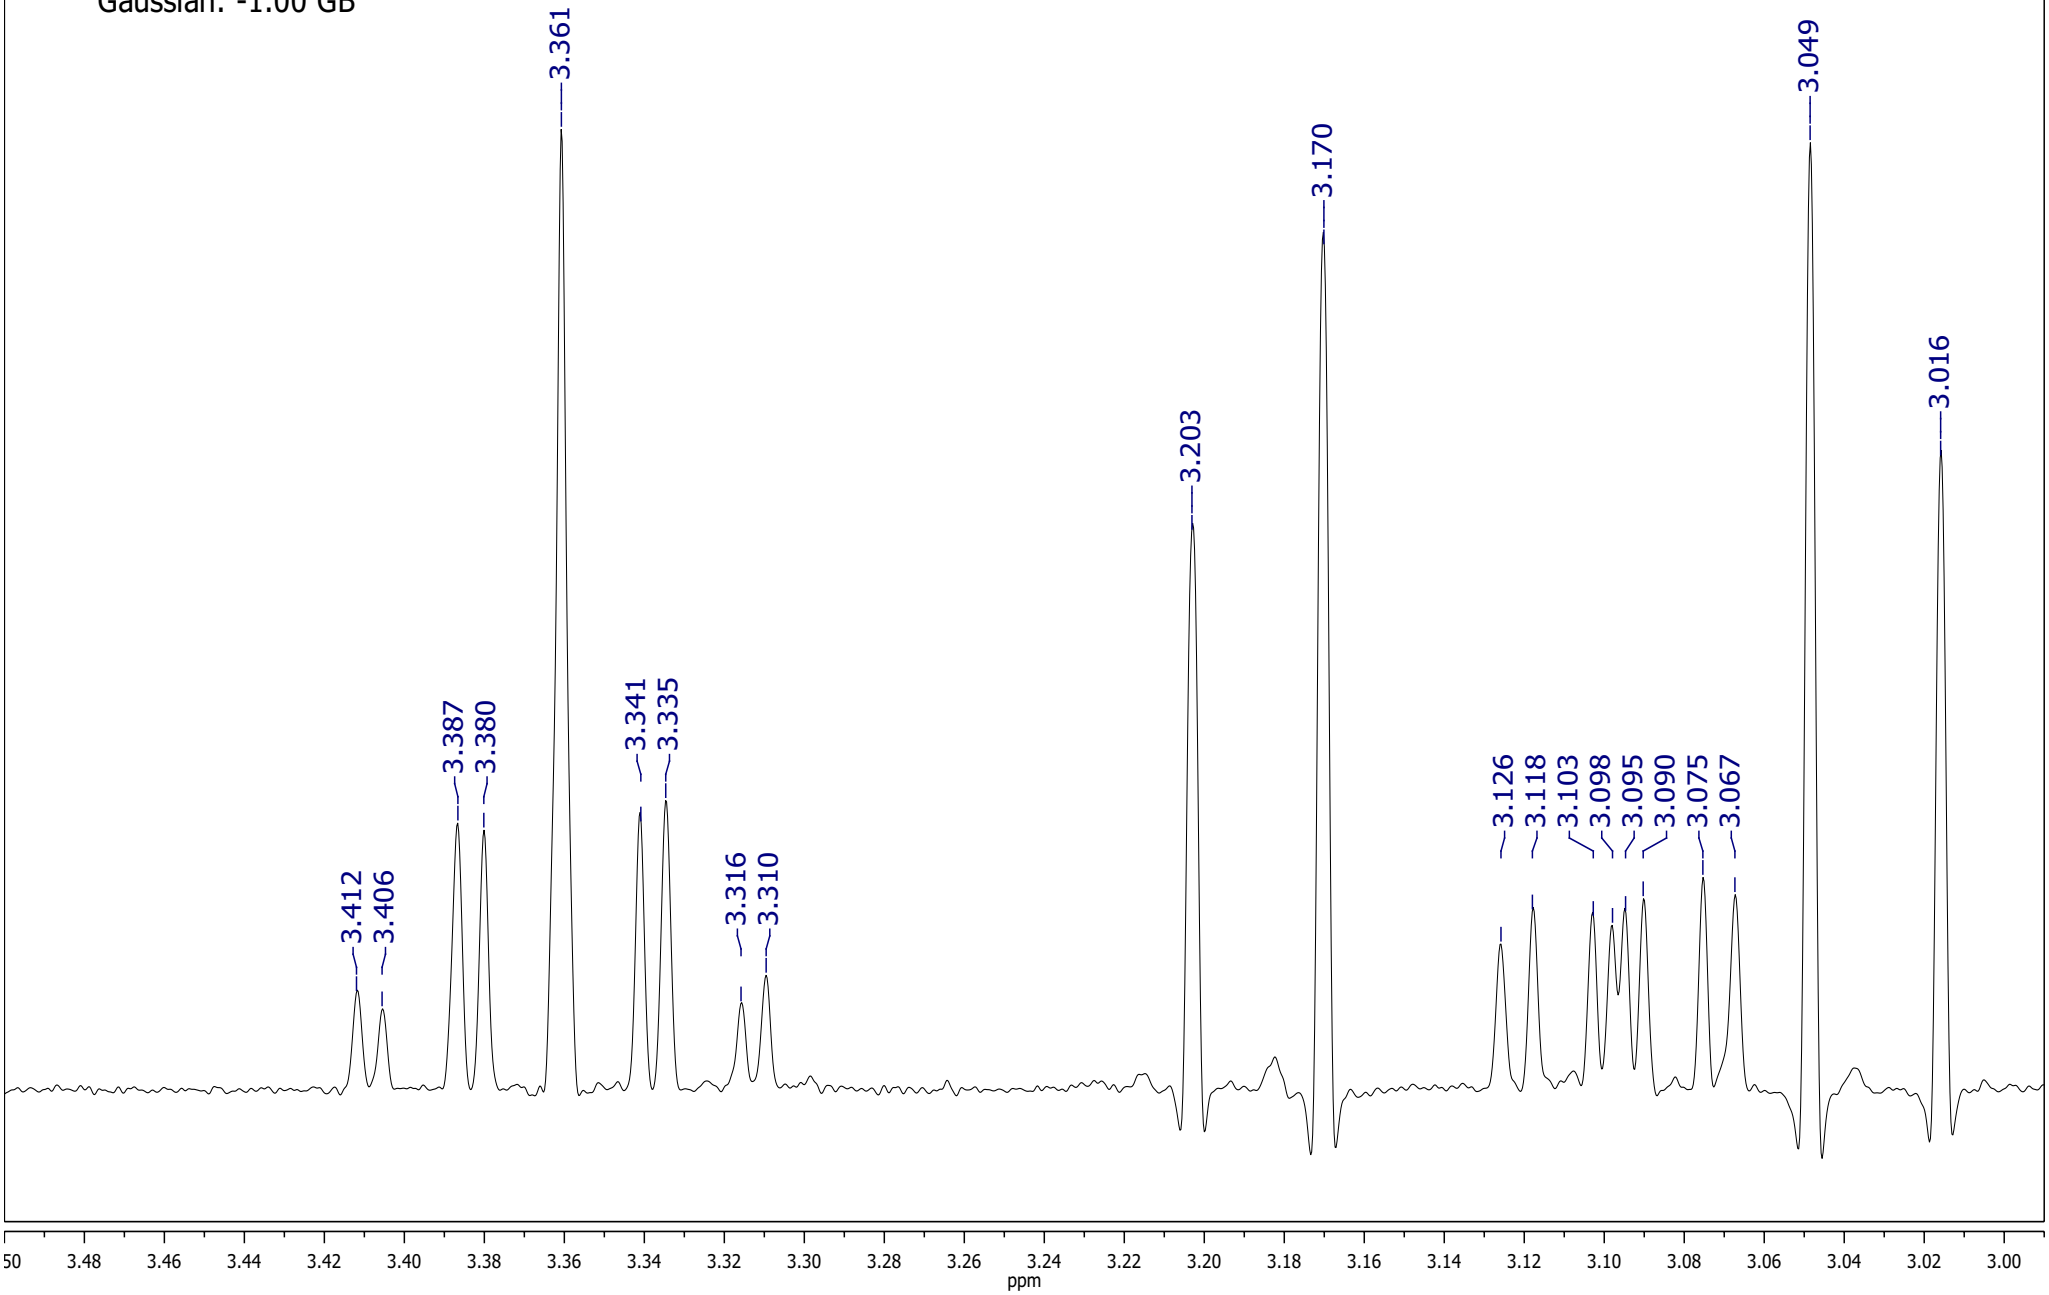

Region of interest: 2.99- 3.50 ppm

Exponential: -1.32  
Gaussian: -1.00 GB

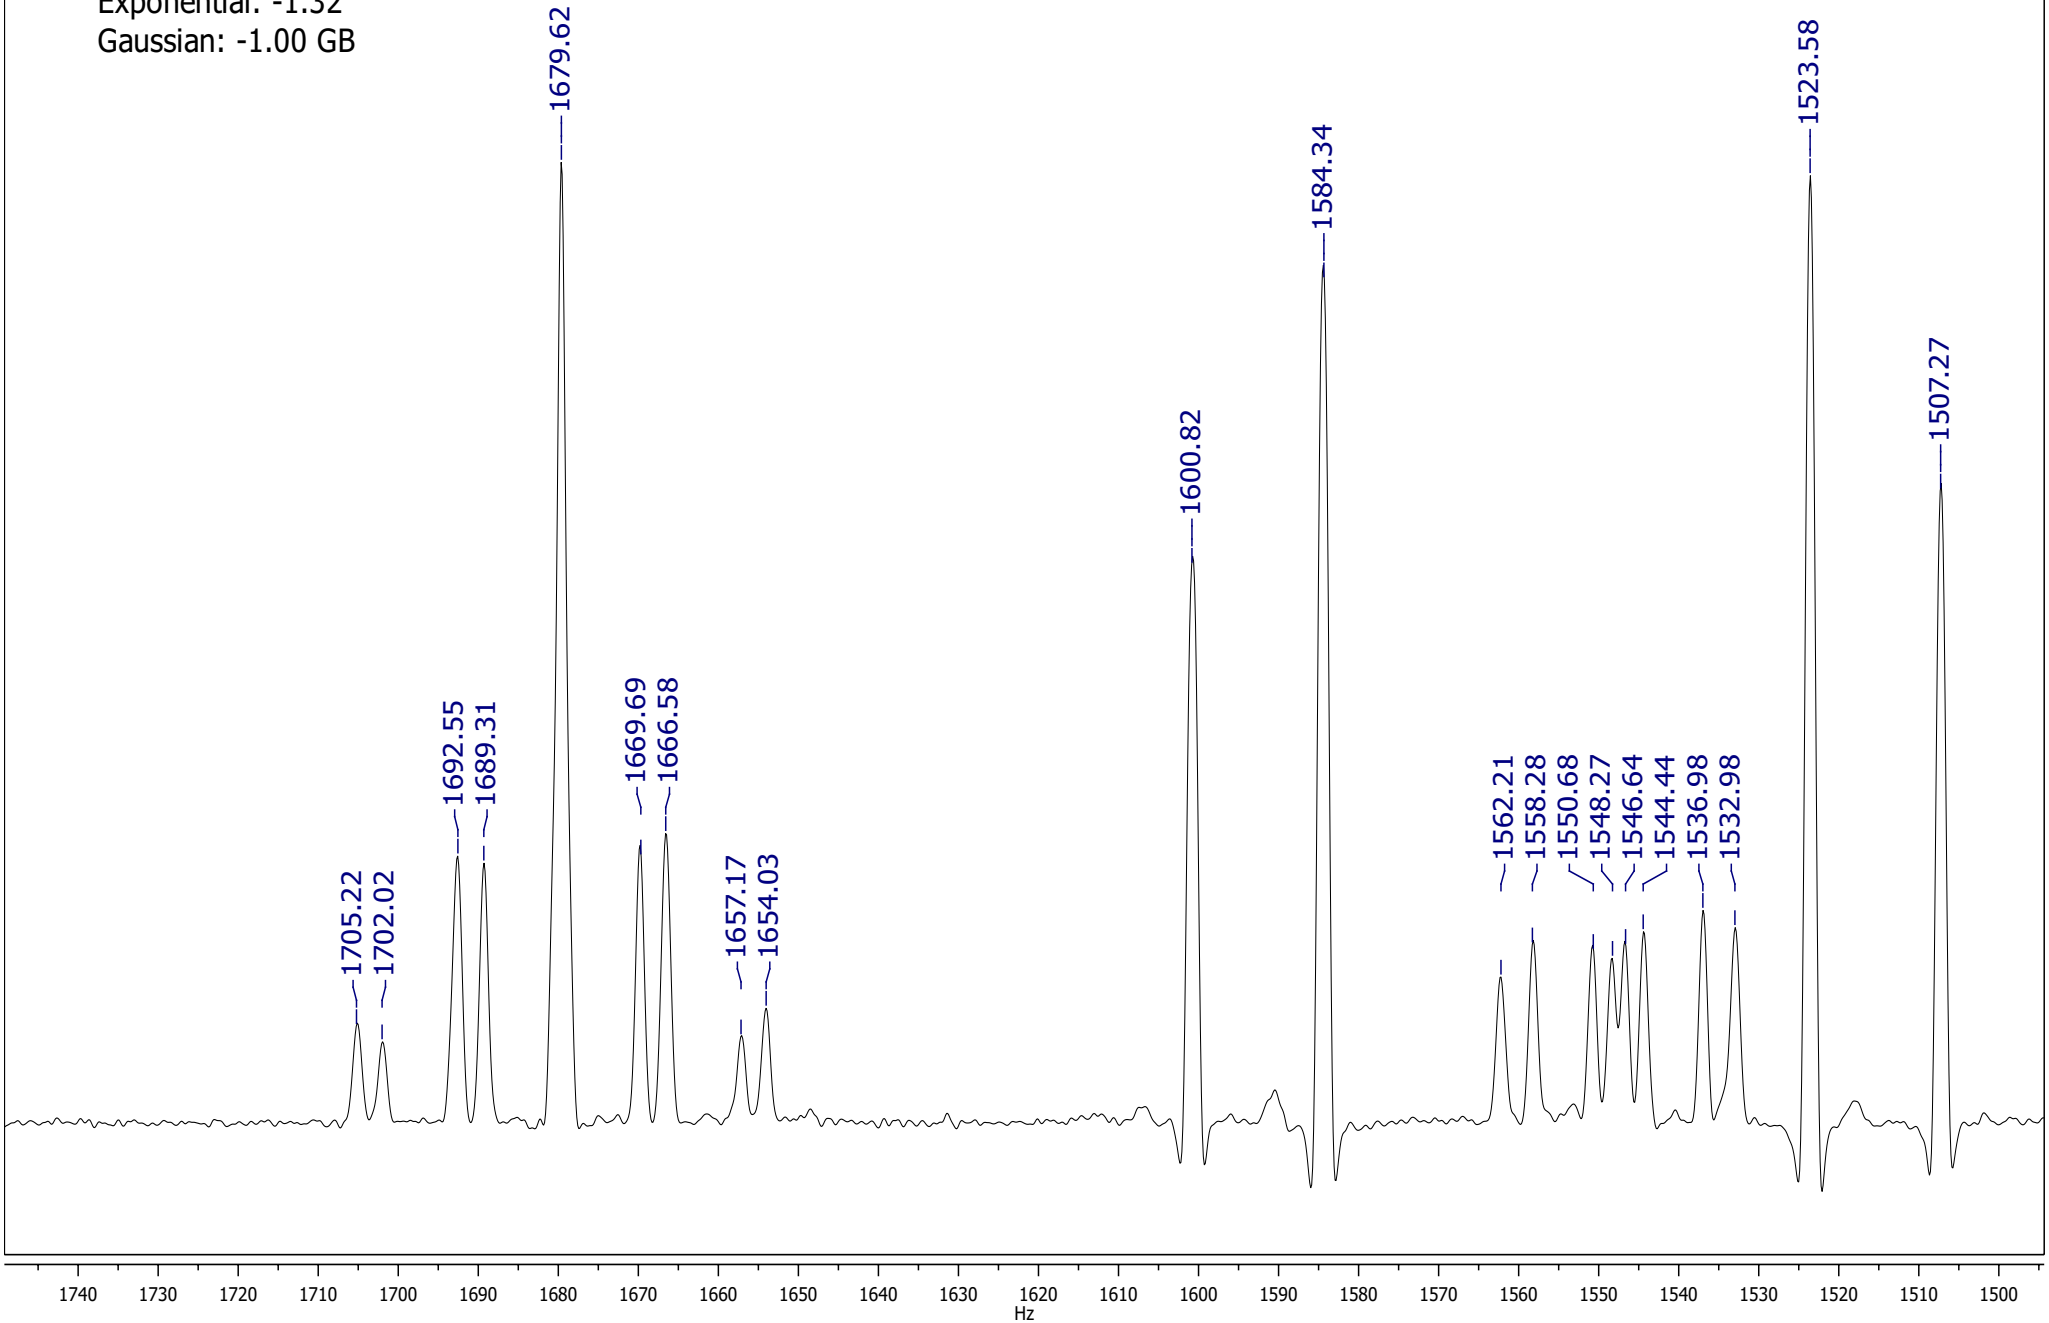

Region of interest: 3.45 - 4.30 ppm

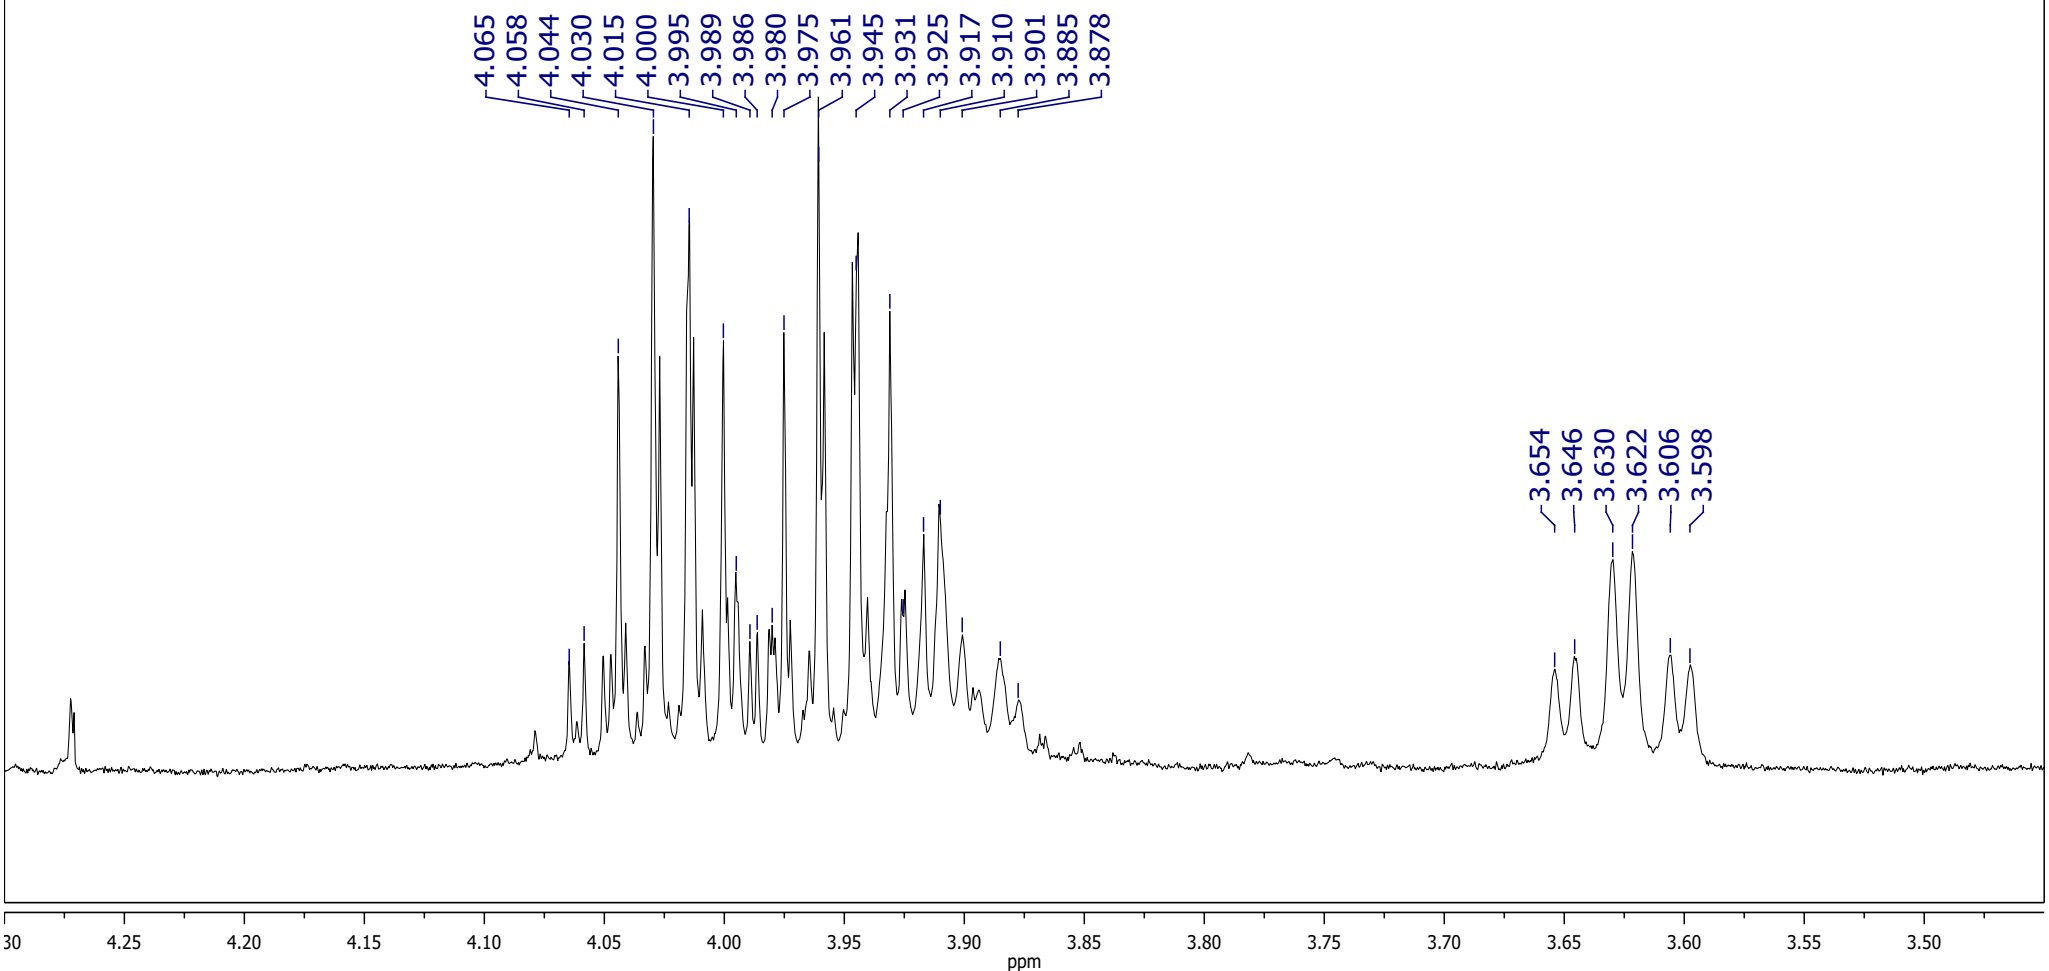

Region of interest: 3.45 - 4.30 ppm

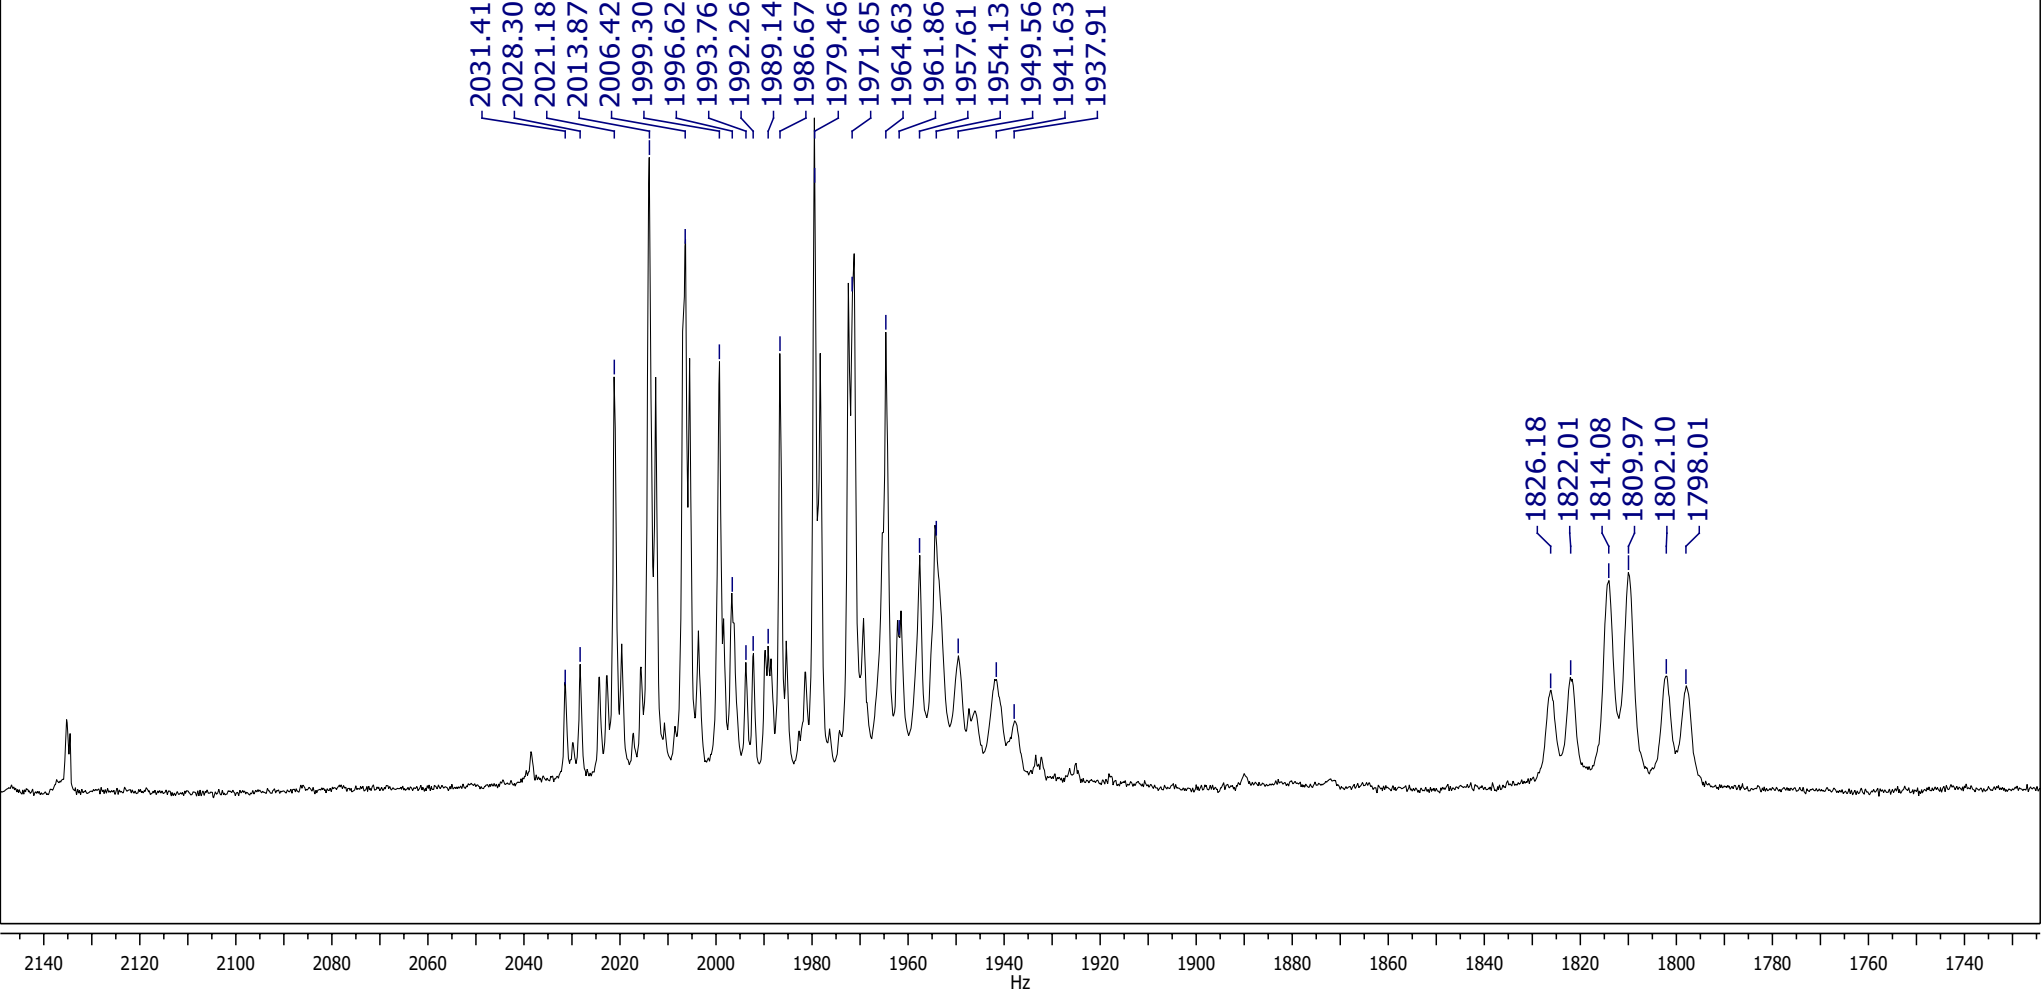

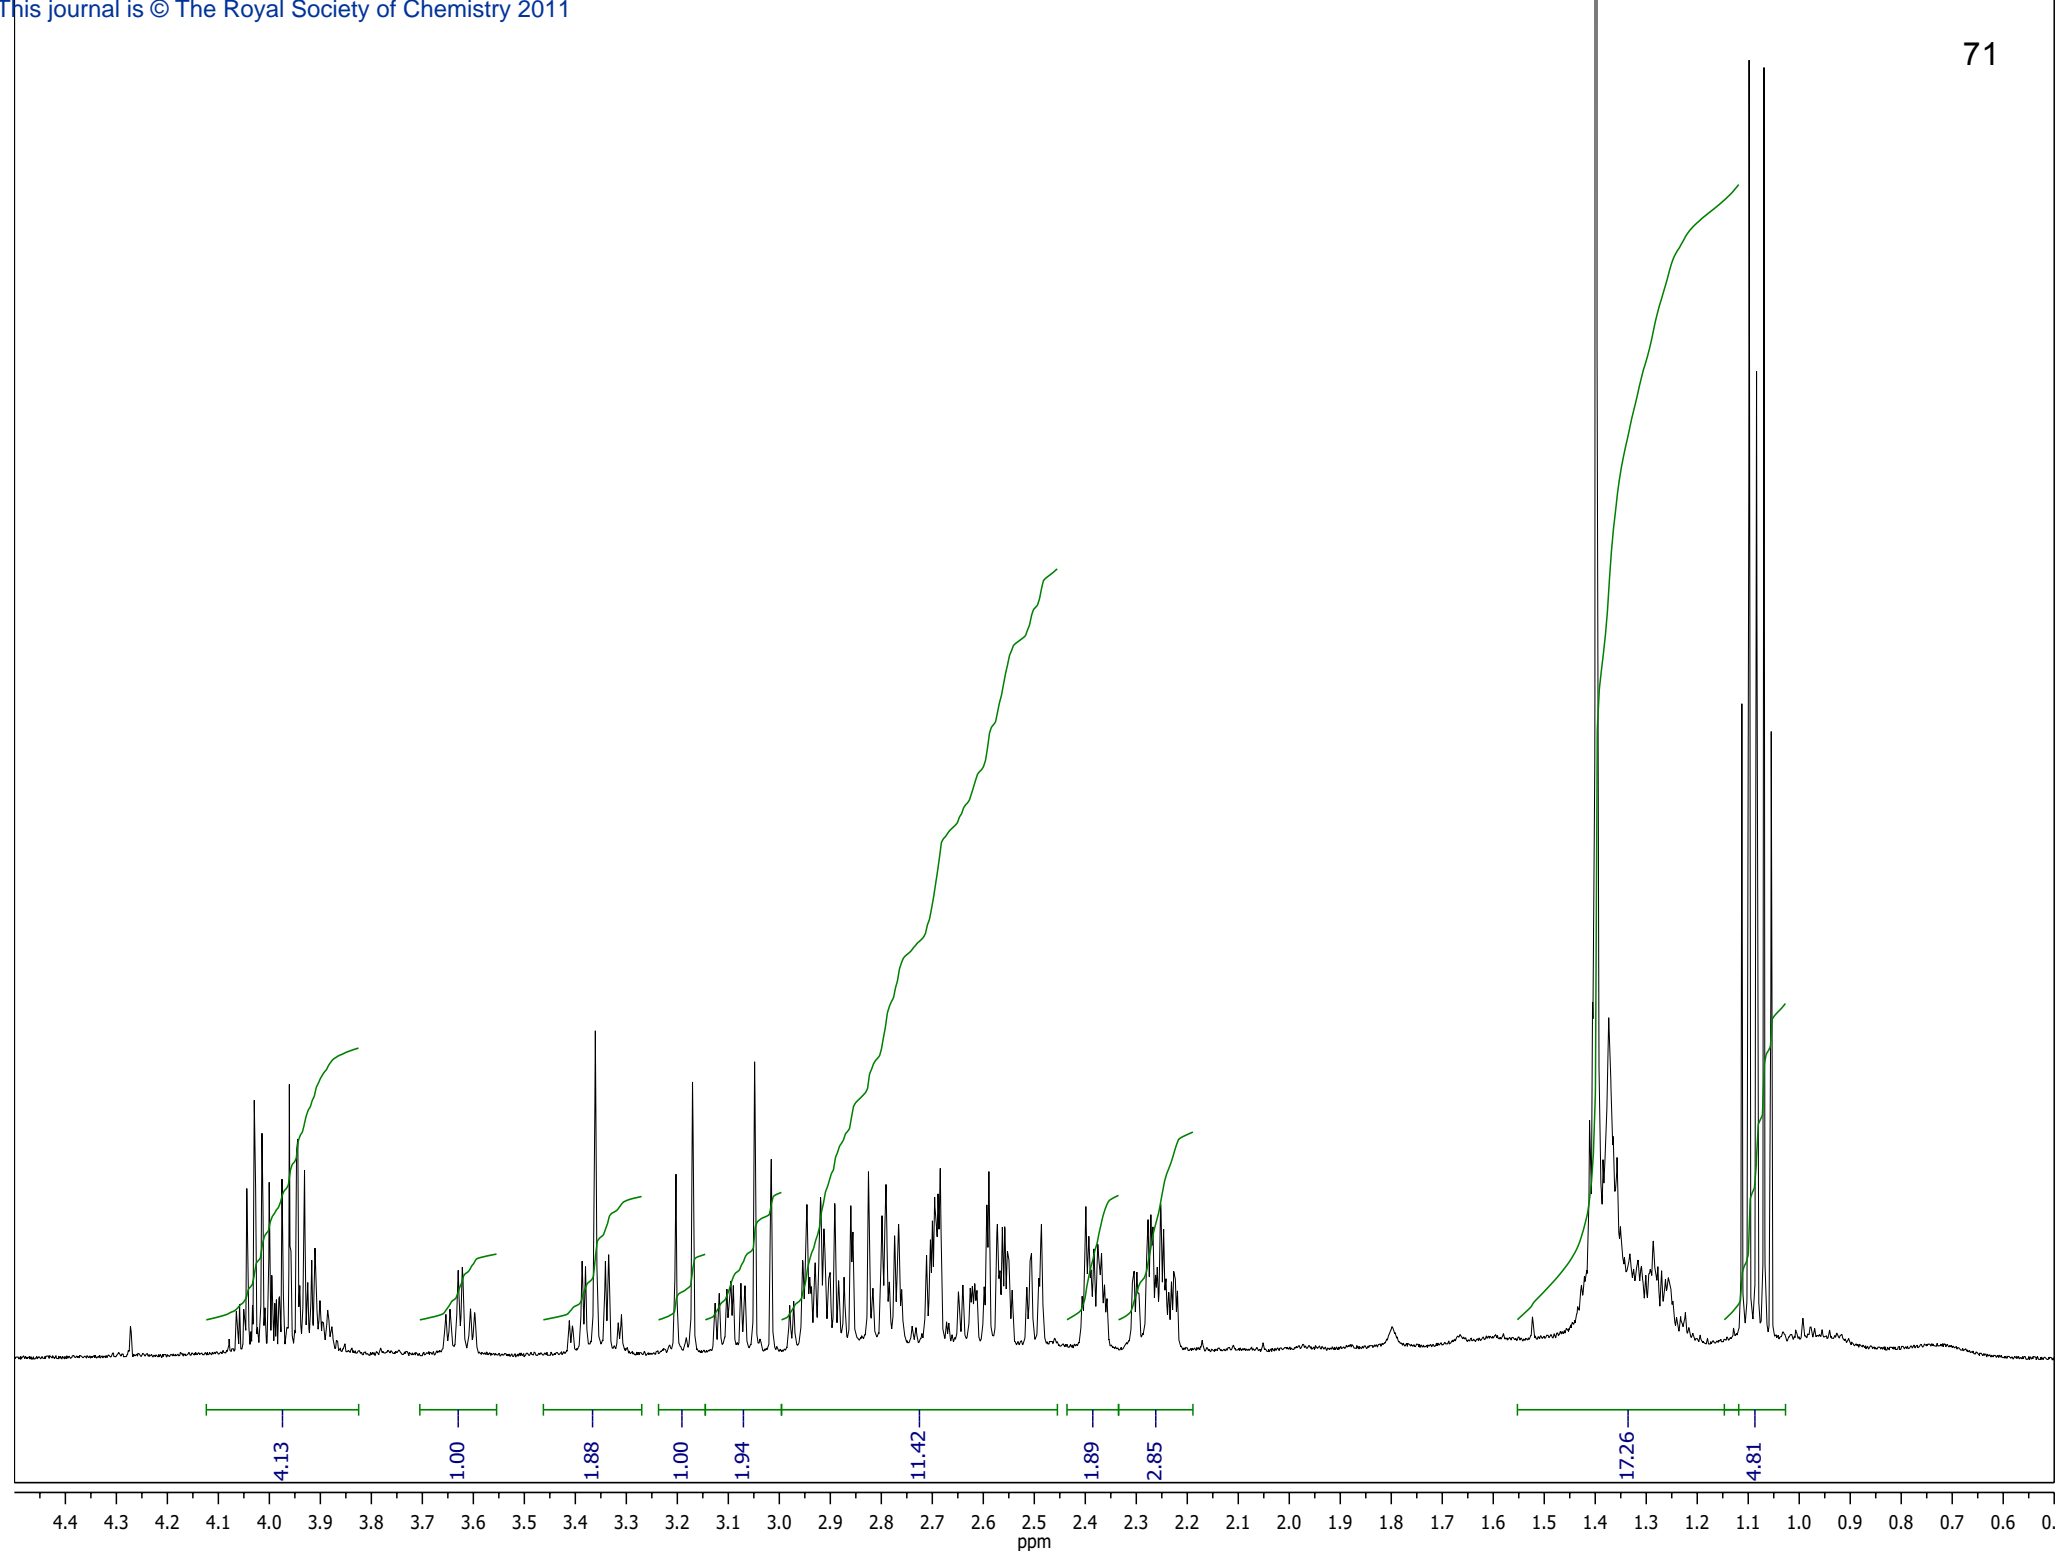

(See previous page for corresponding 1D  
proton spectrum)

| Parameters             |                                           |
|------------------------|-------------------------------------------|
| Parameter              | Value (f2, f1)                            |
| Data File Name         | RF-CB-TE1A1P_protected_C6D6-gCOSY_01.fid/ |
| Origin                 | Varian                                    |
| Solvent                | C6D6                                      |
| Number of Scans        | 16                                        |
| Receiver Gain          | 20                                        |
| Acquisition Time       | 0.1500                                    |
| Acquisition Date       | 2011-02-18T23:06:36                       |
| Spectrometer Frequency | (499.7758484, 499.7758484)                |
| Spectral Width         | (8000.0, 8000.0)                          |
| Lowest Frequency       | (-1500.1, -1496.1)                        |
| Nucleus                | (1H, 1H)                                  |
| Acquired Size          | (1200, 256)                               |
| Spectral Size          | (2048, 2048)                              |

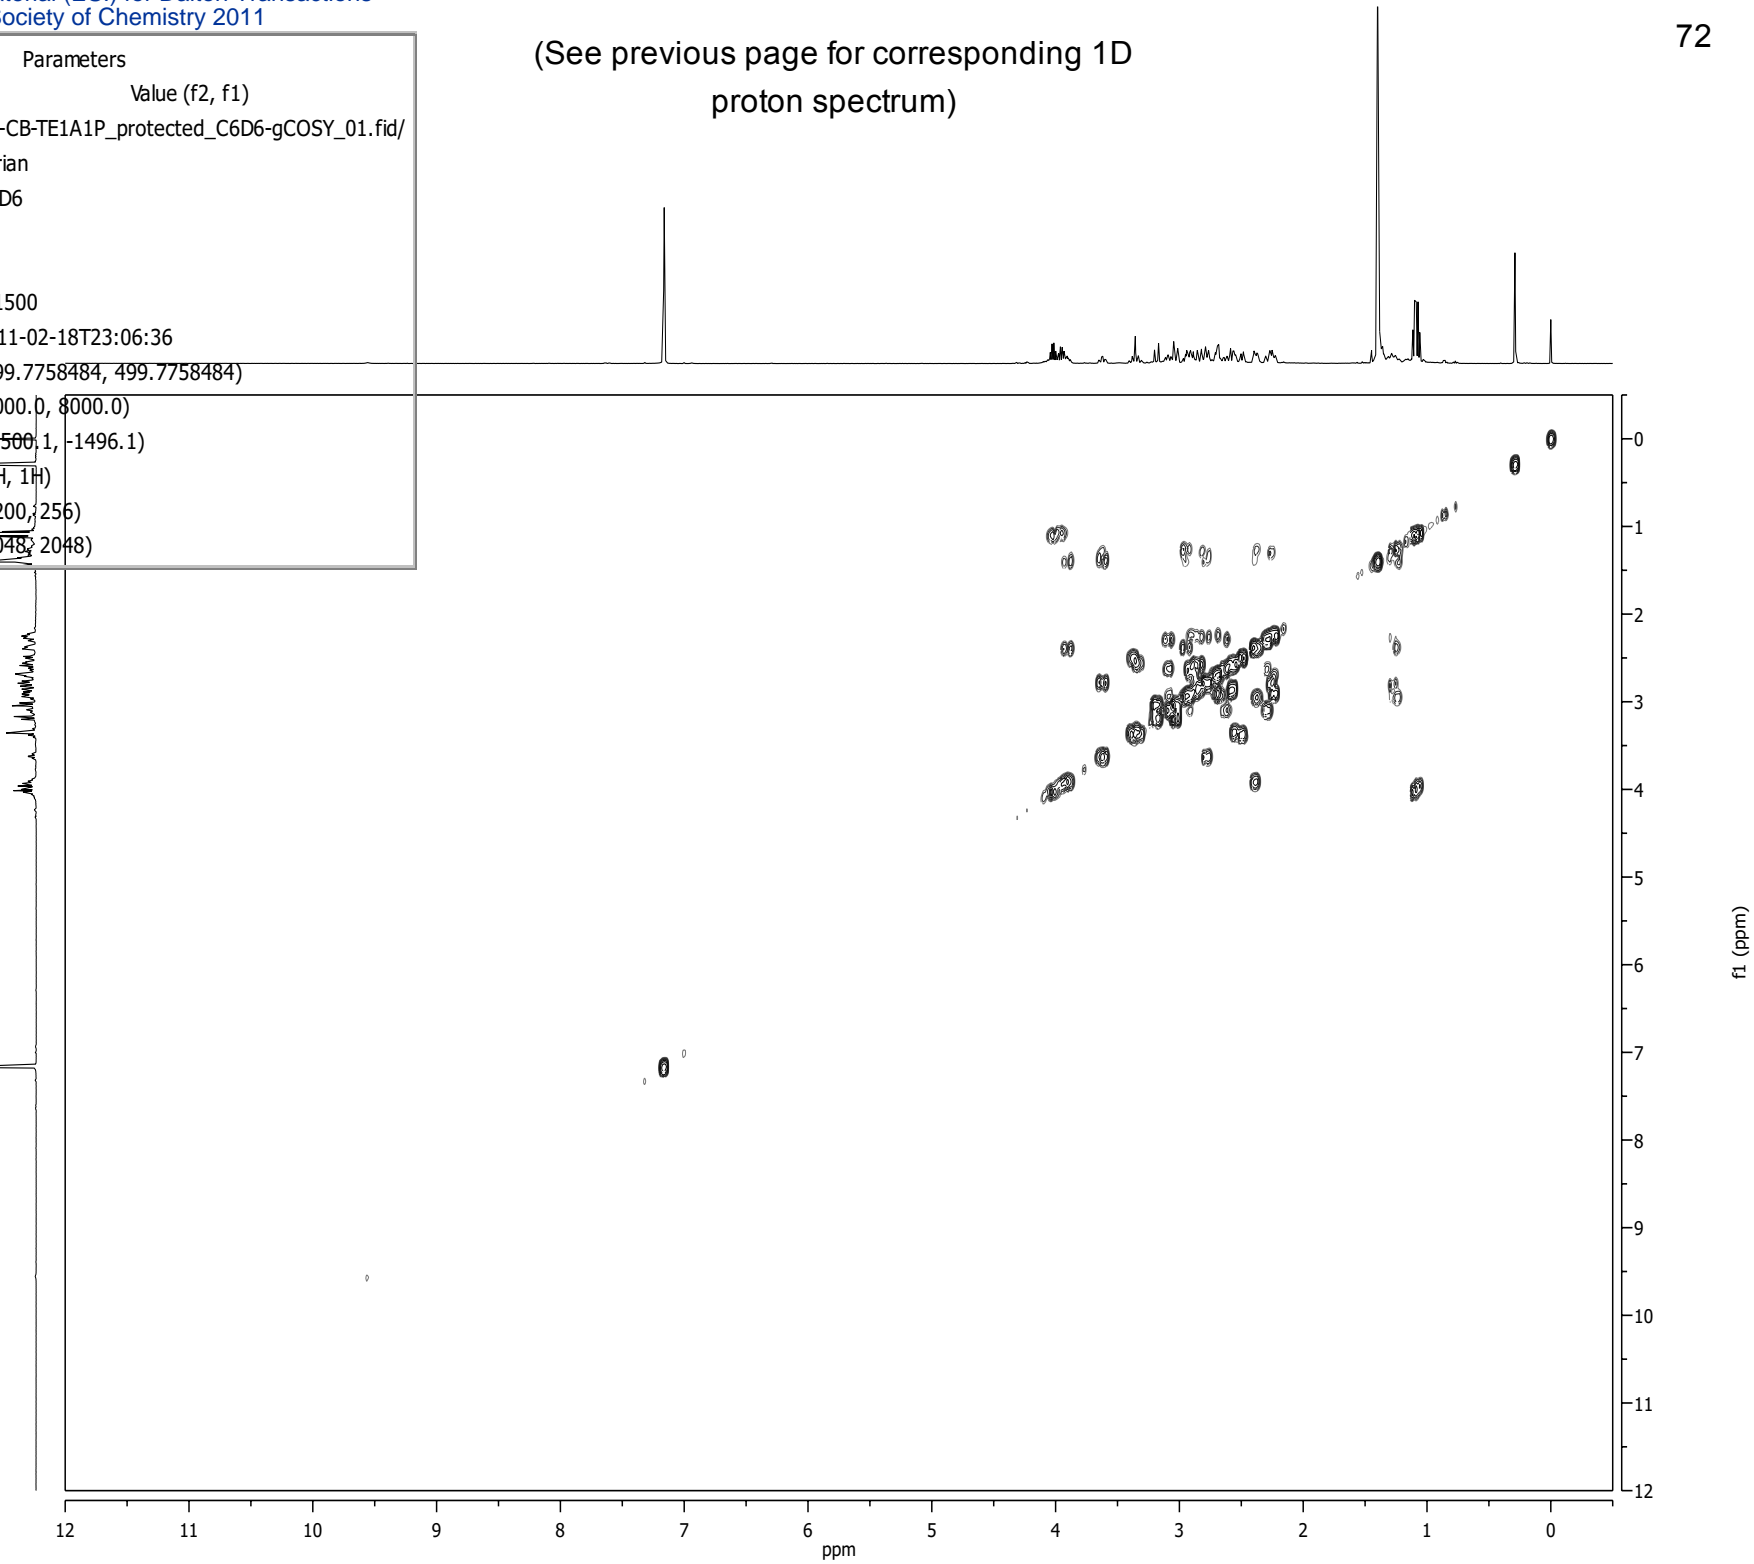

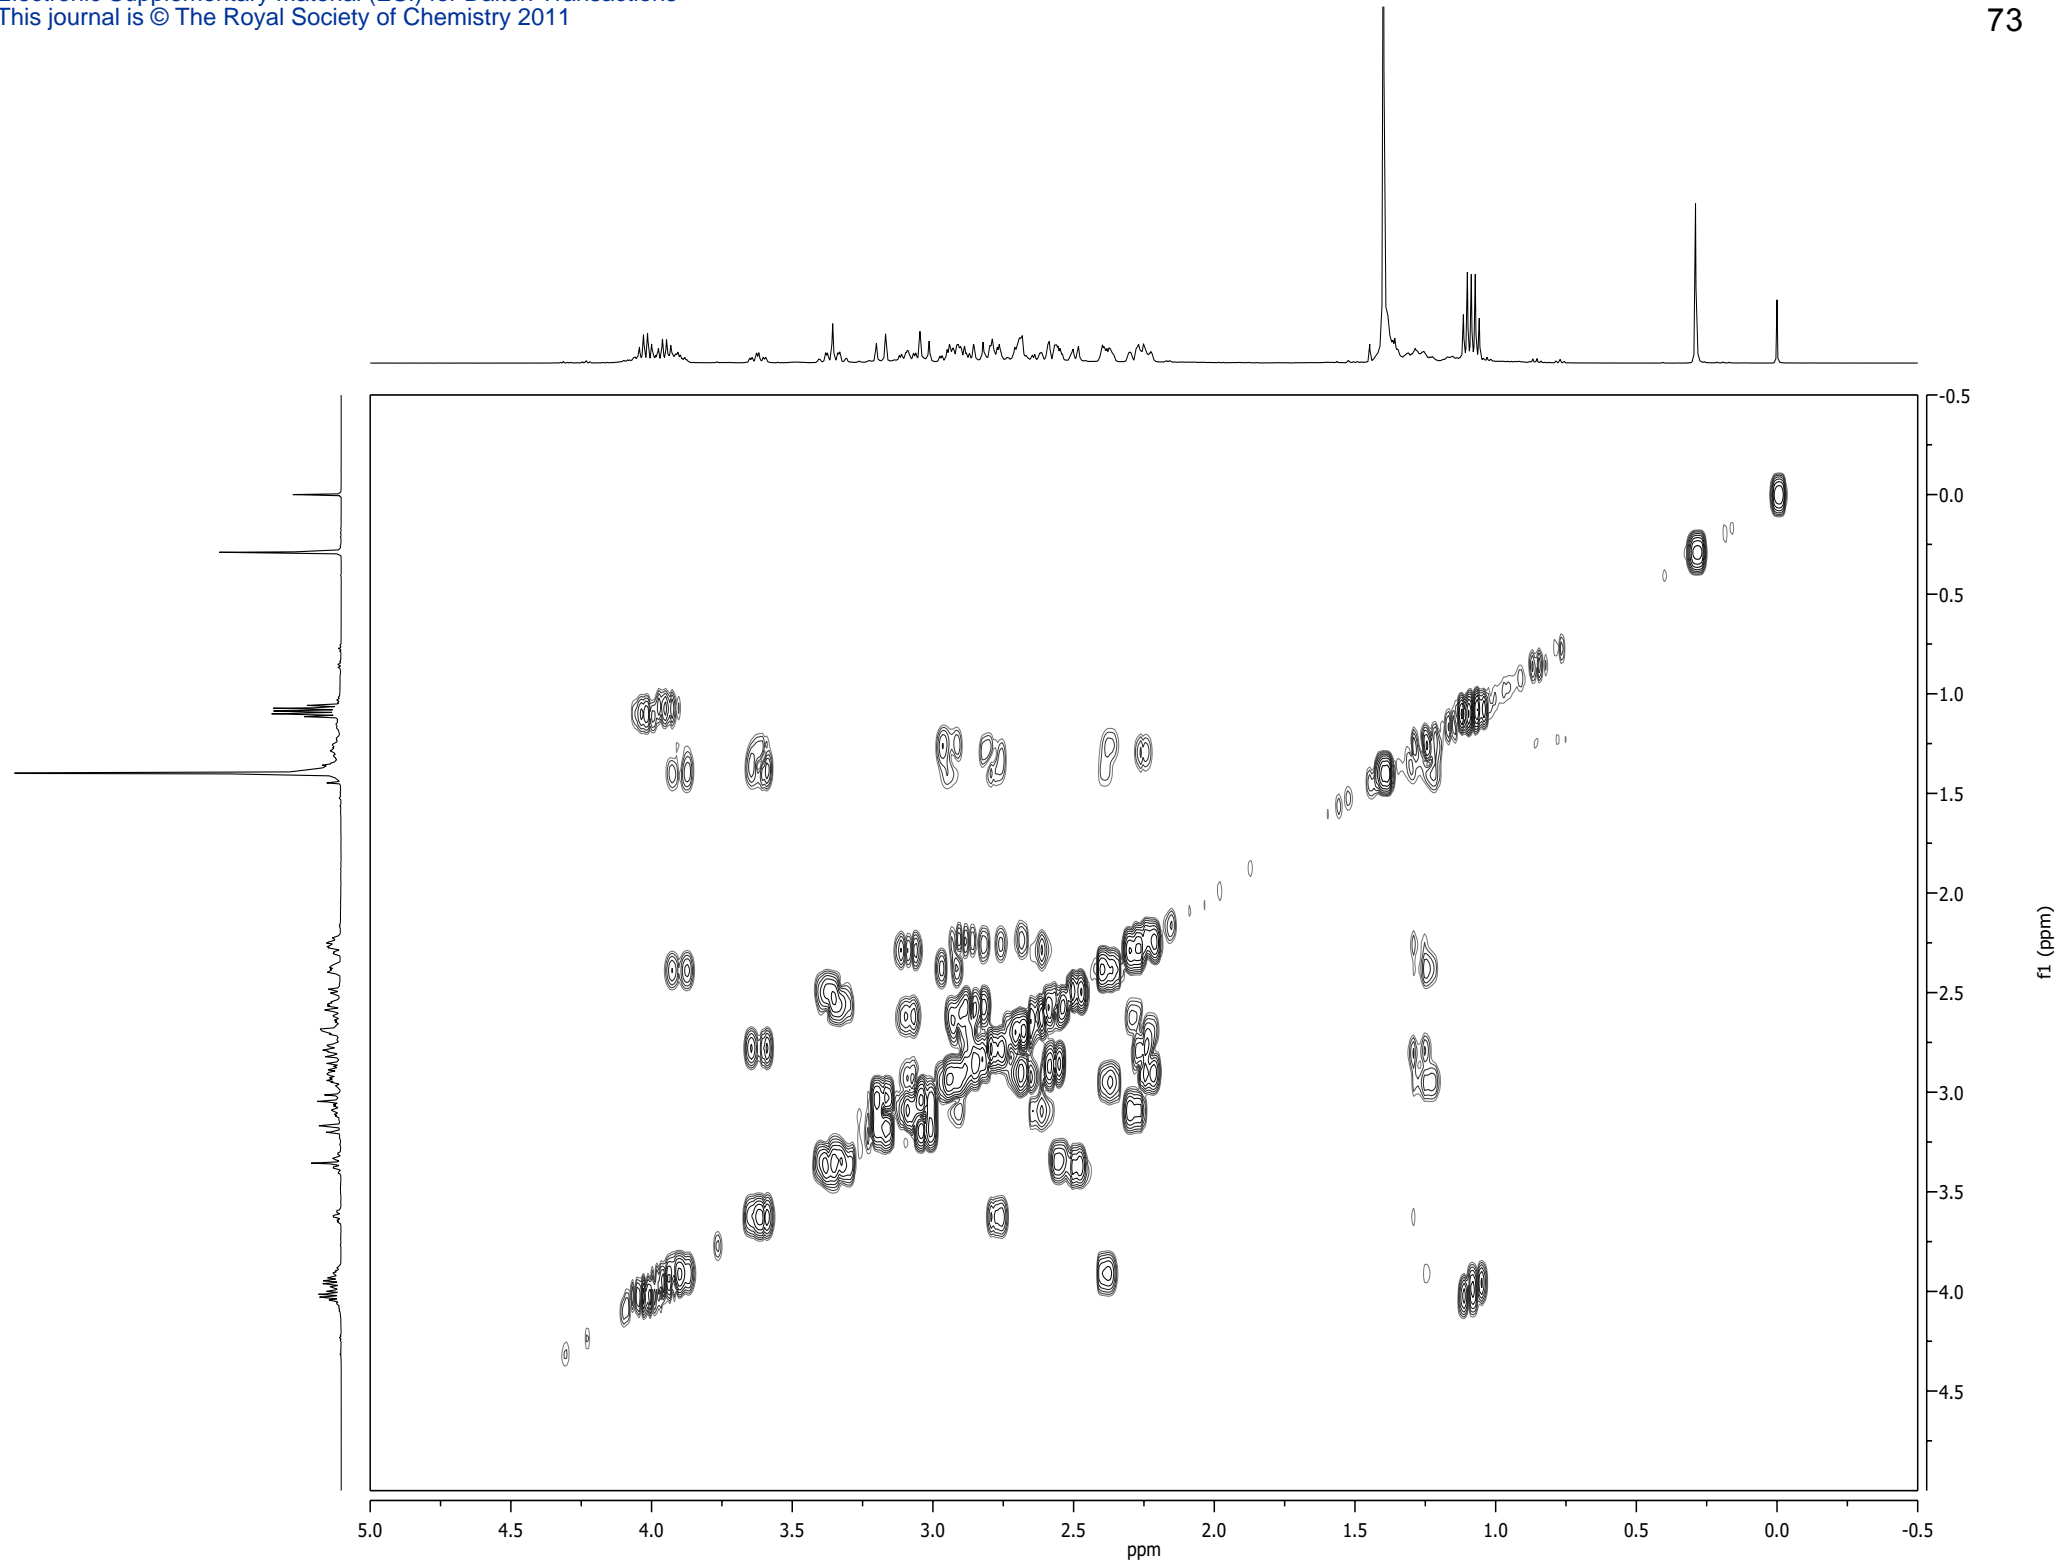

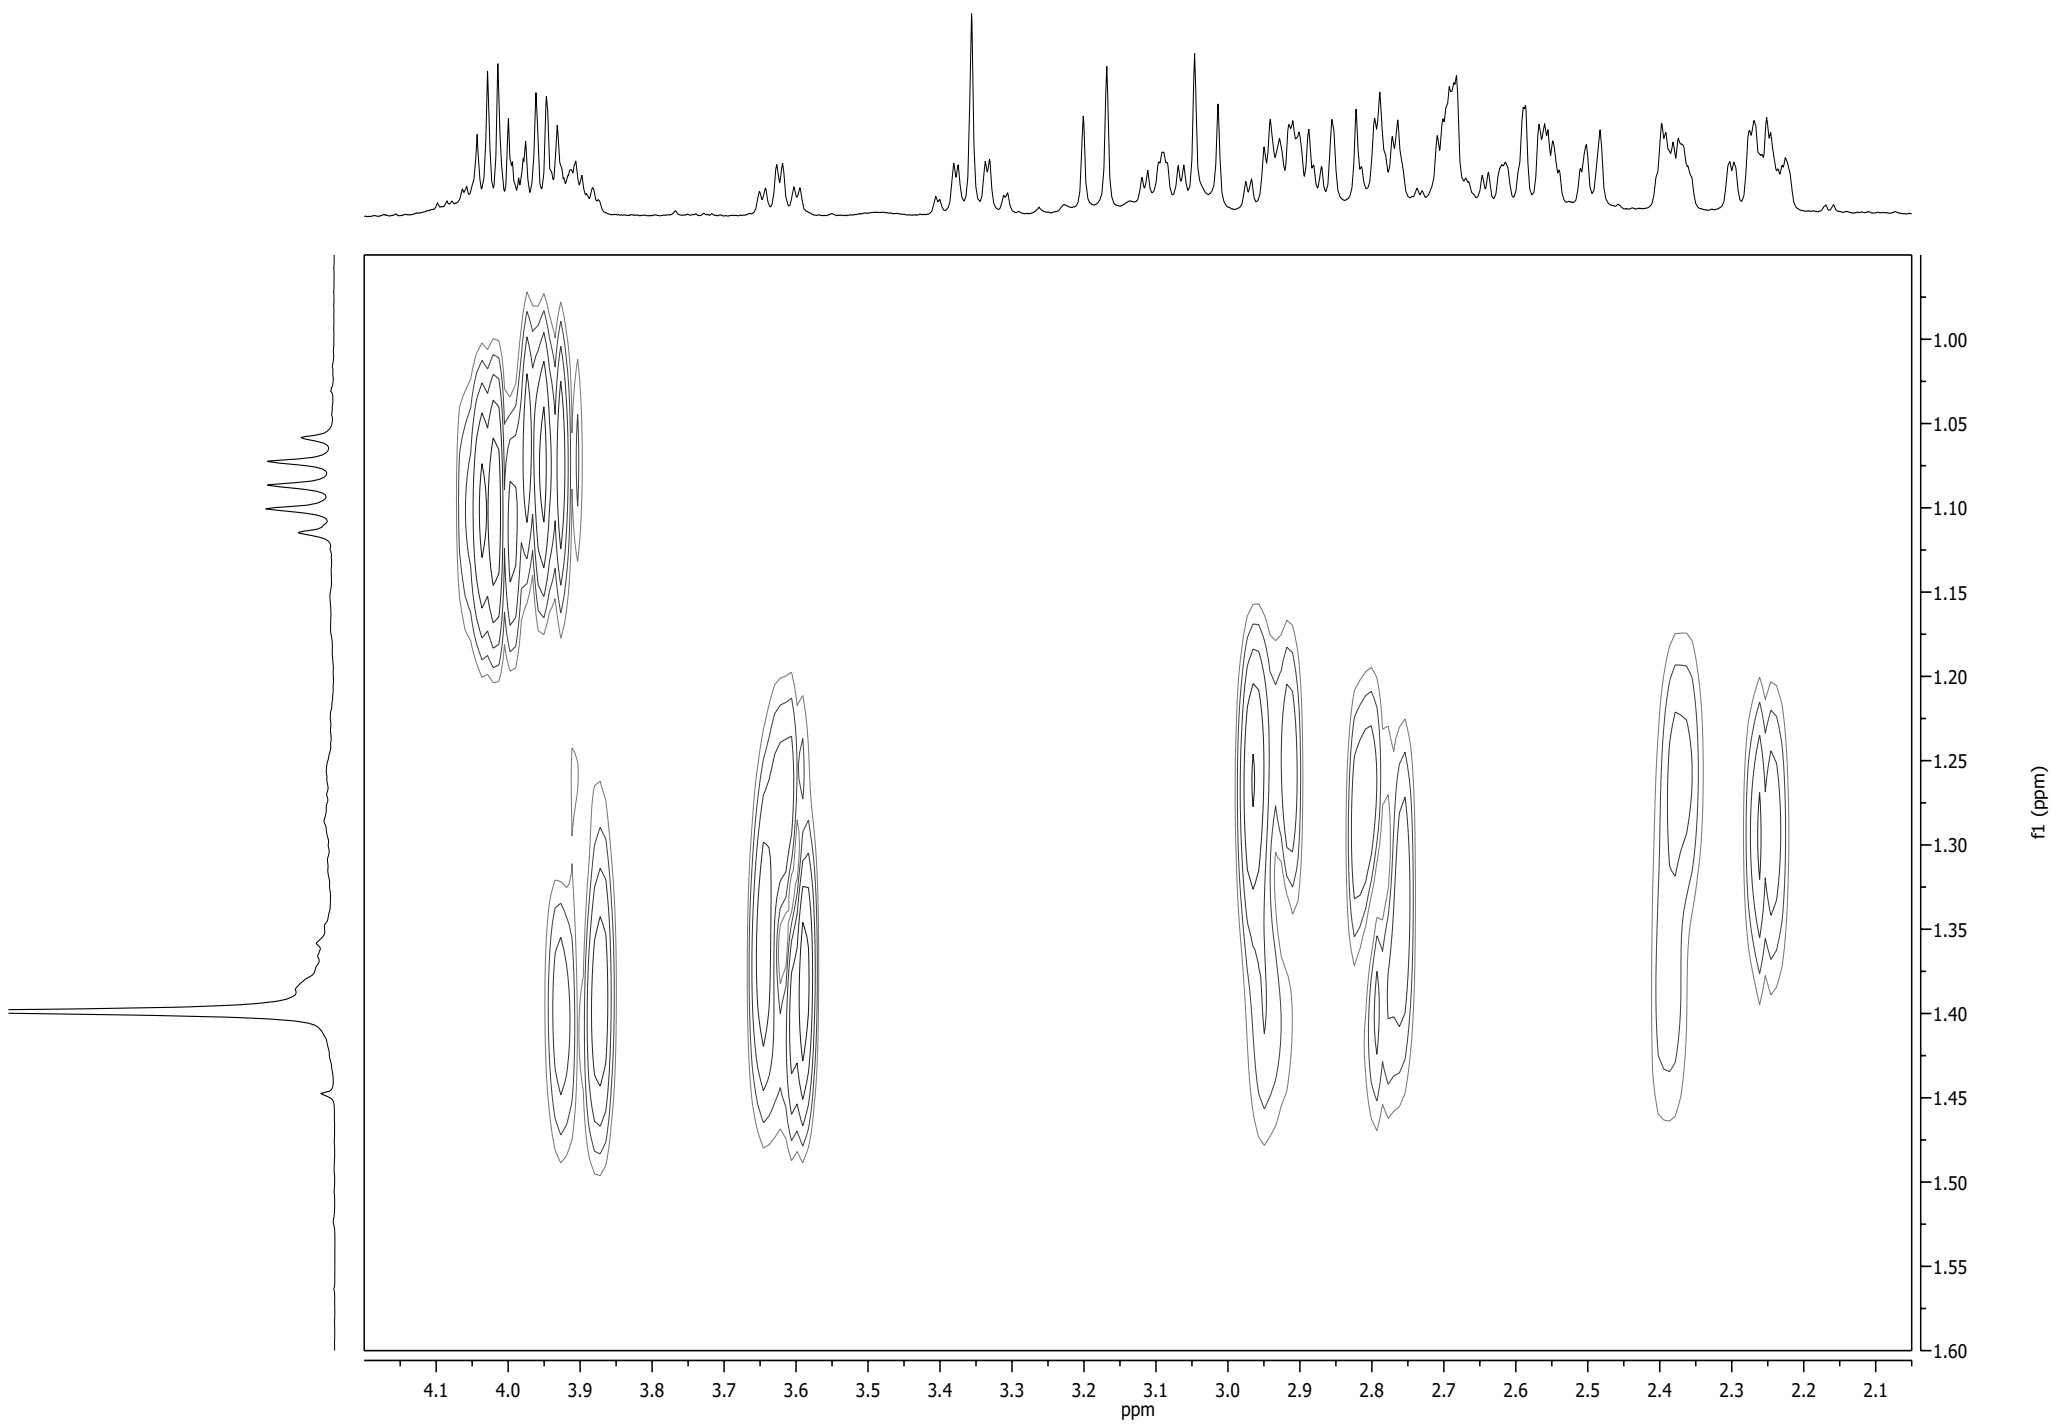

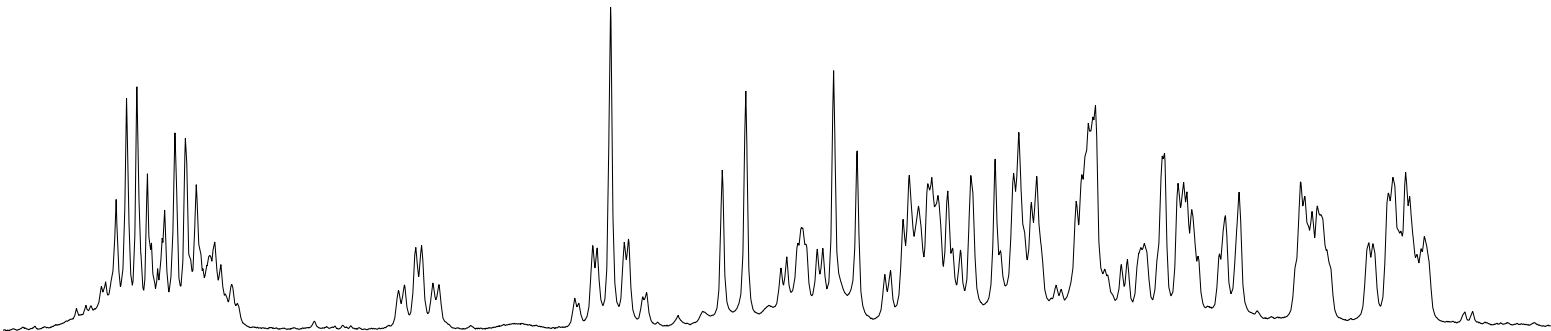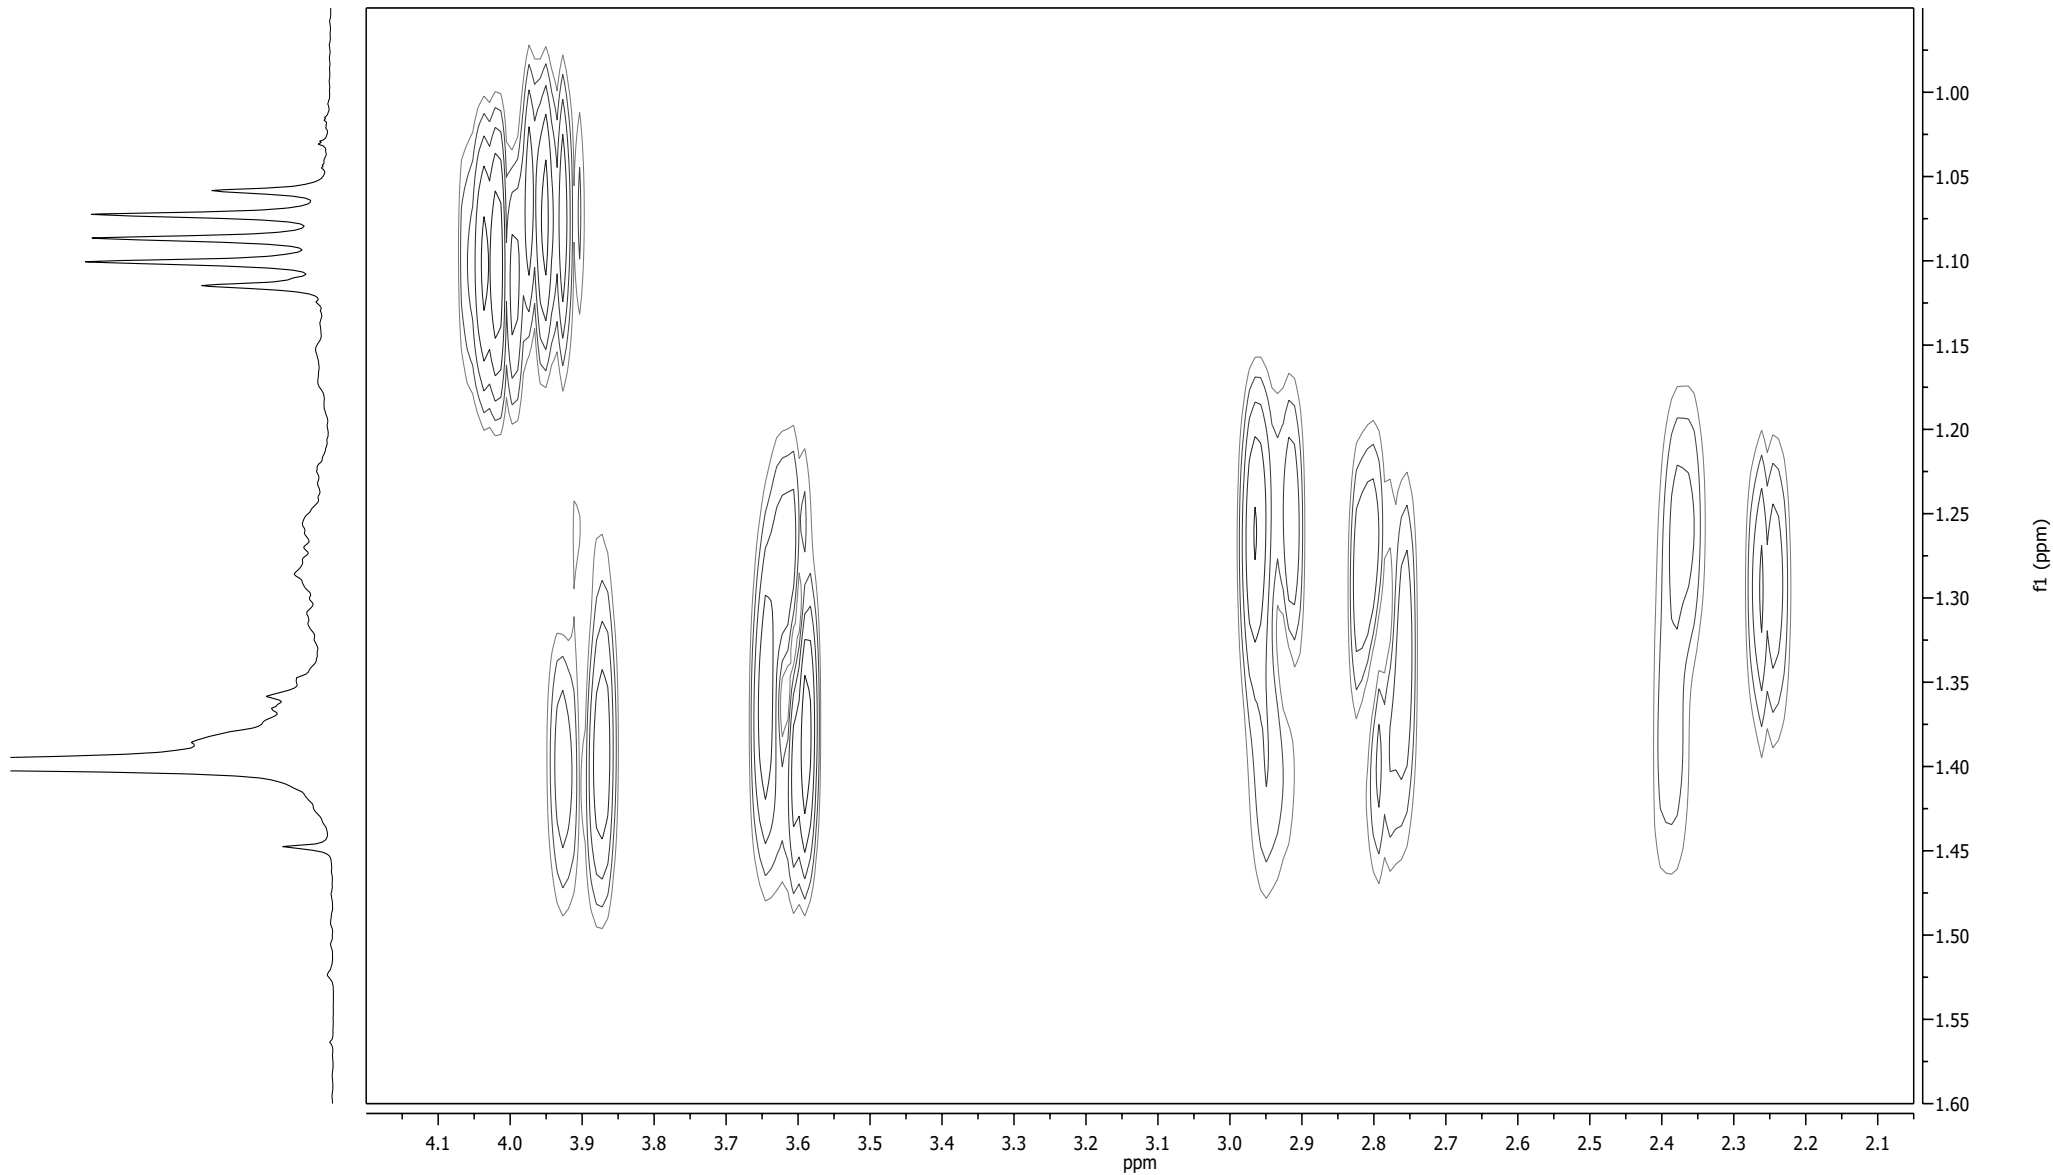

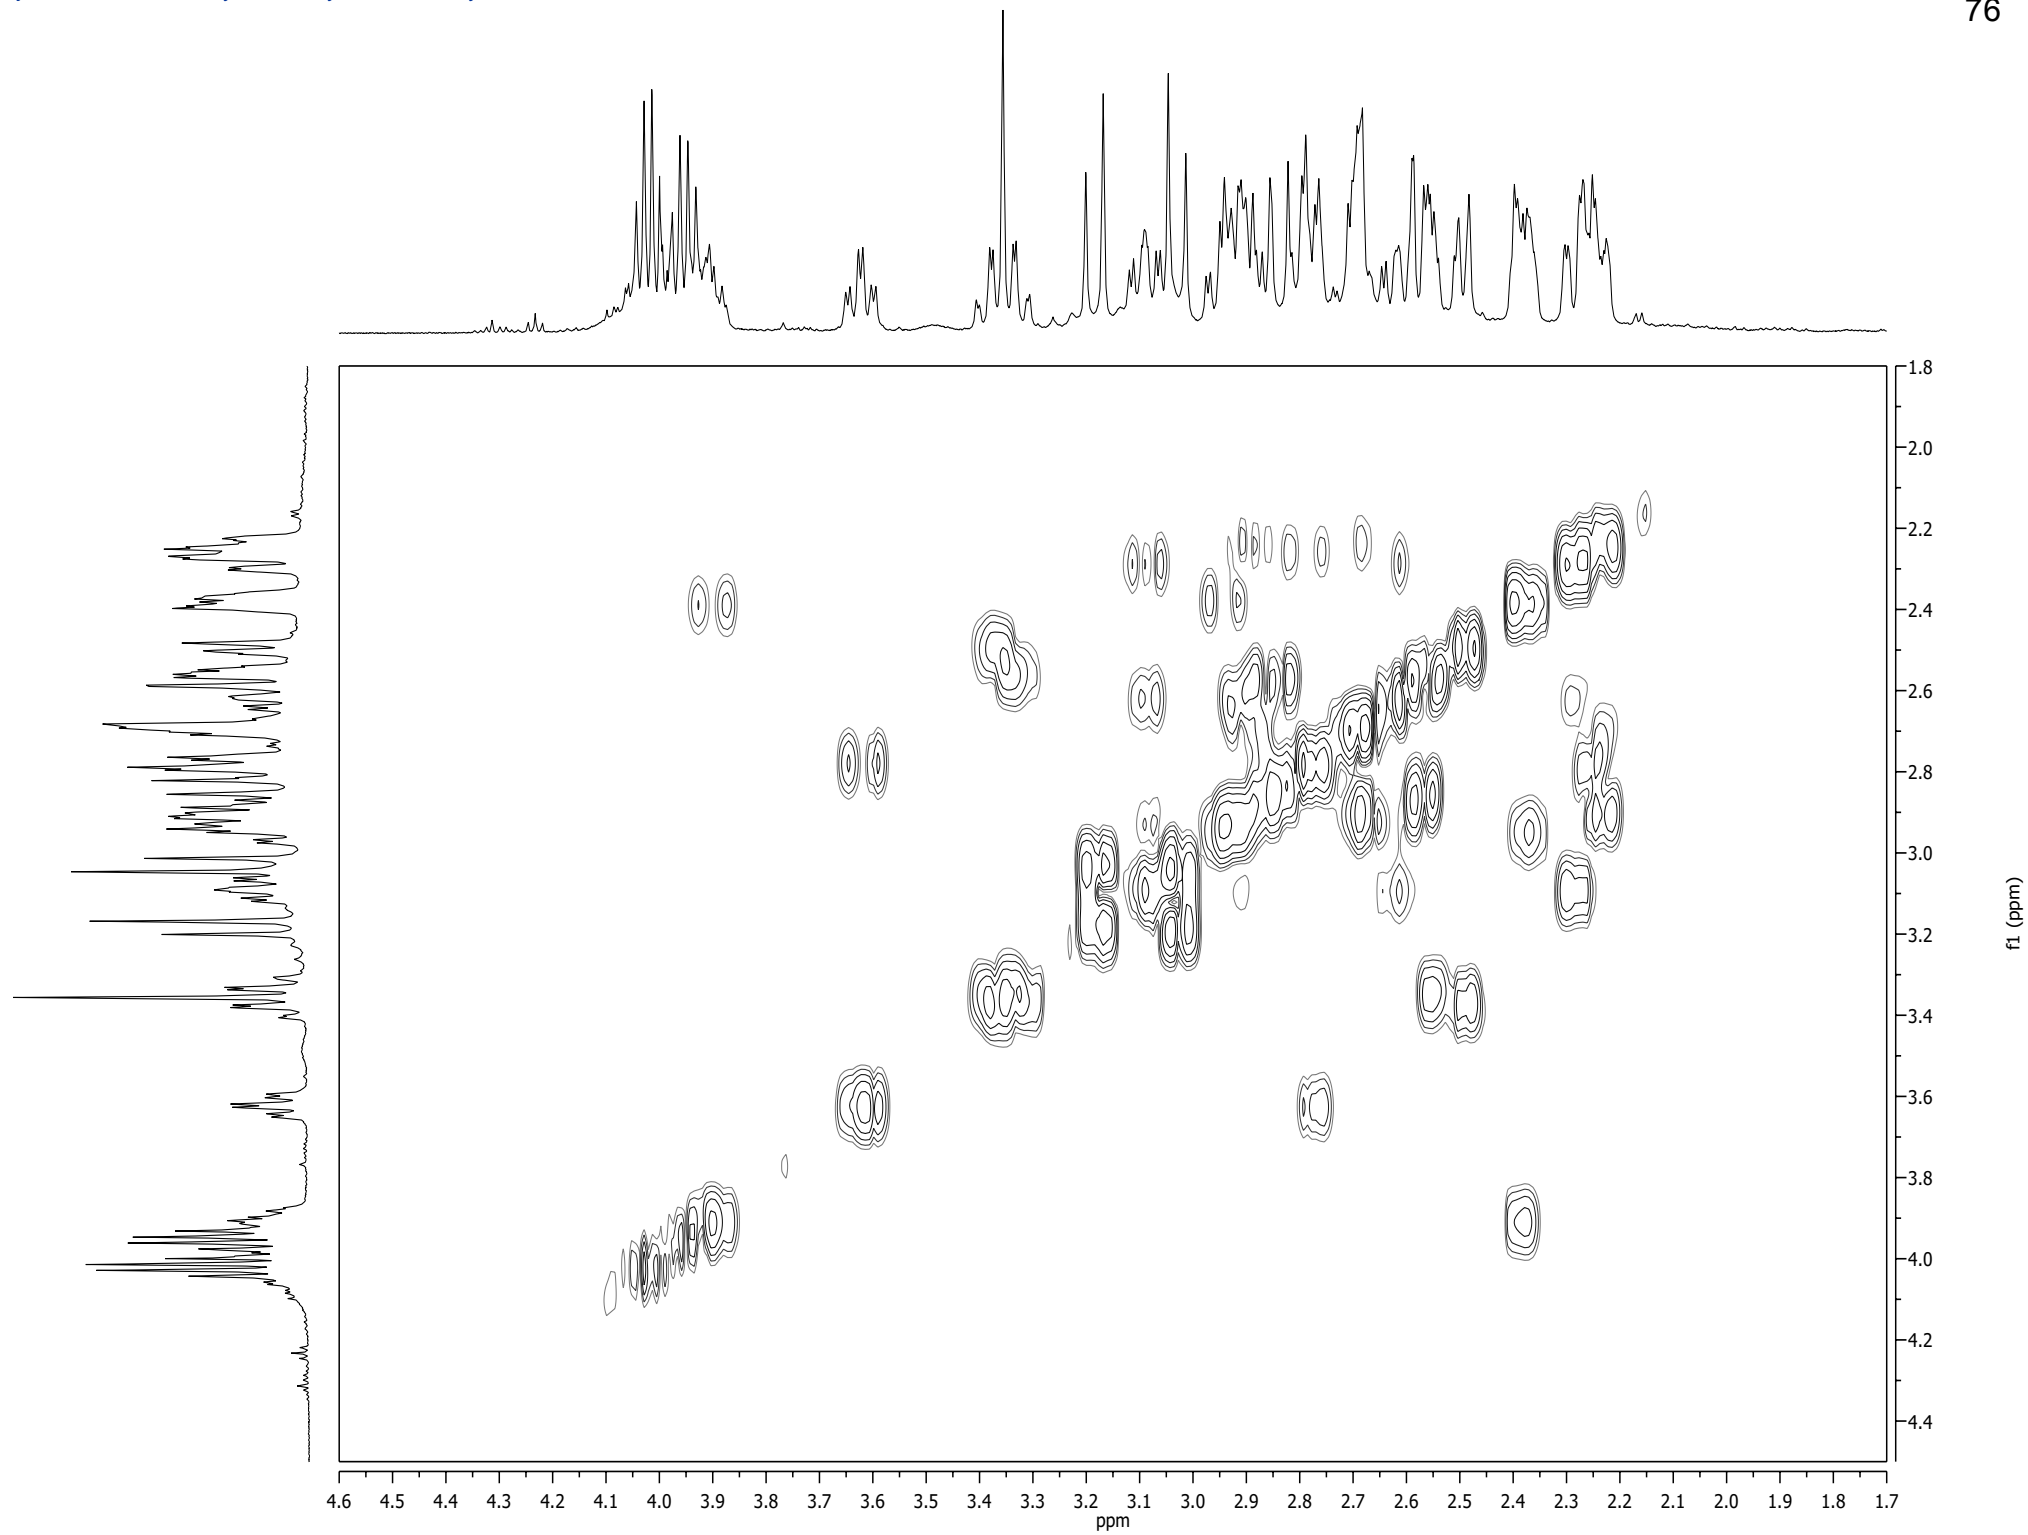

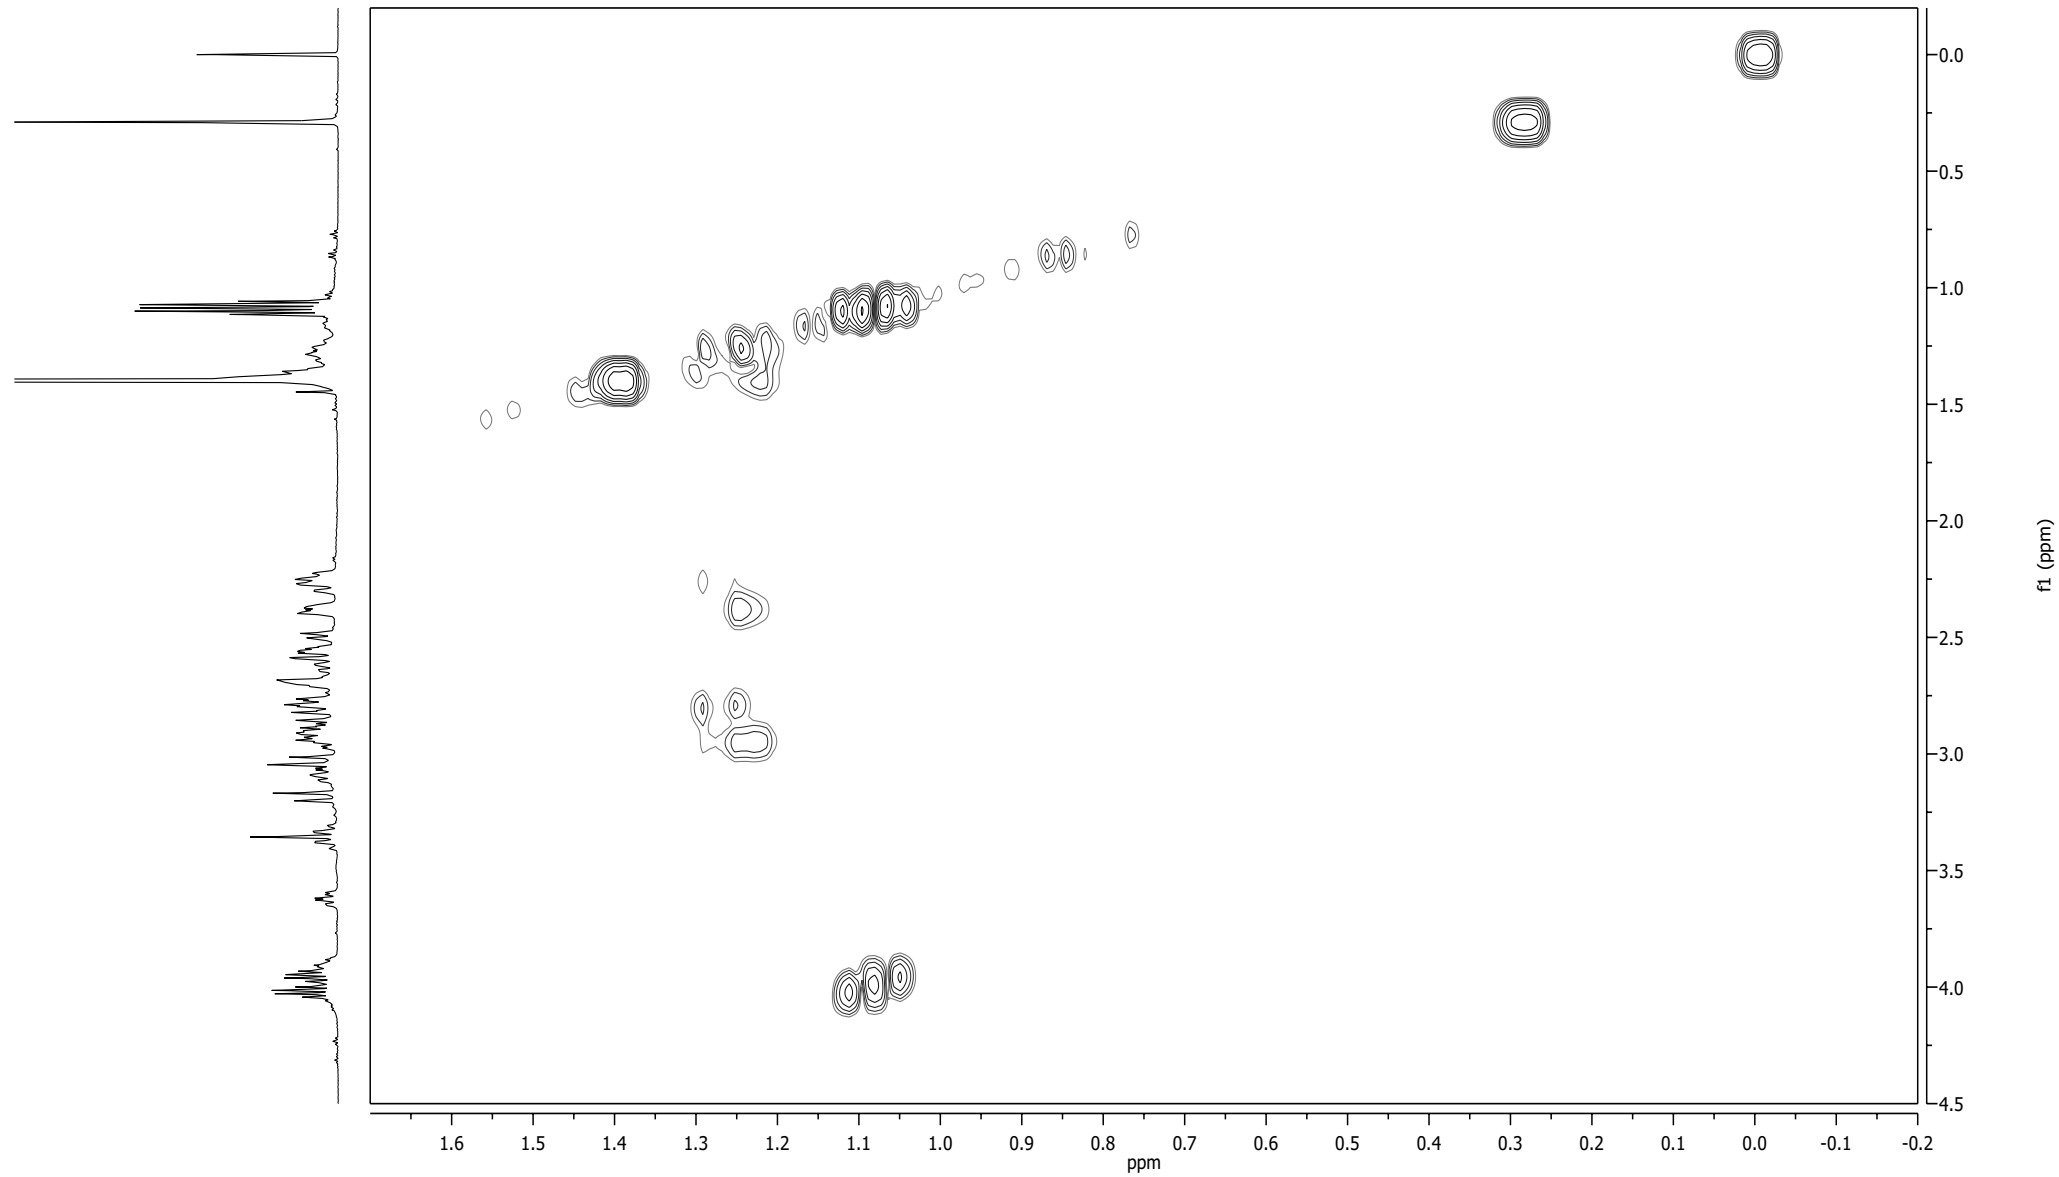

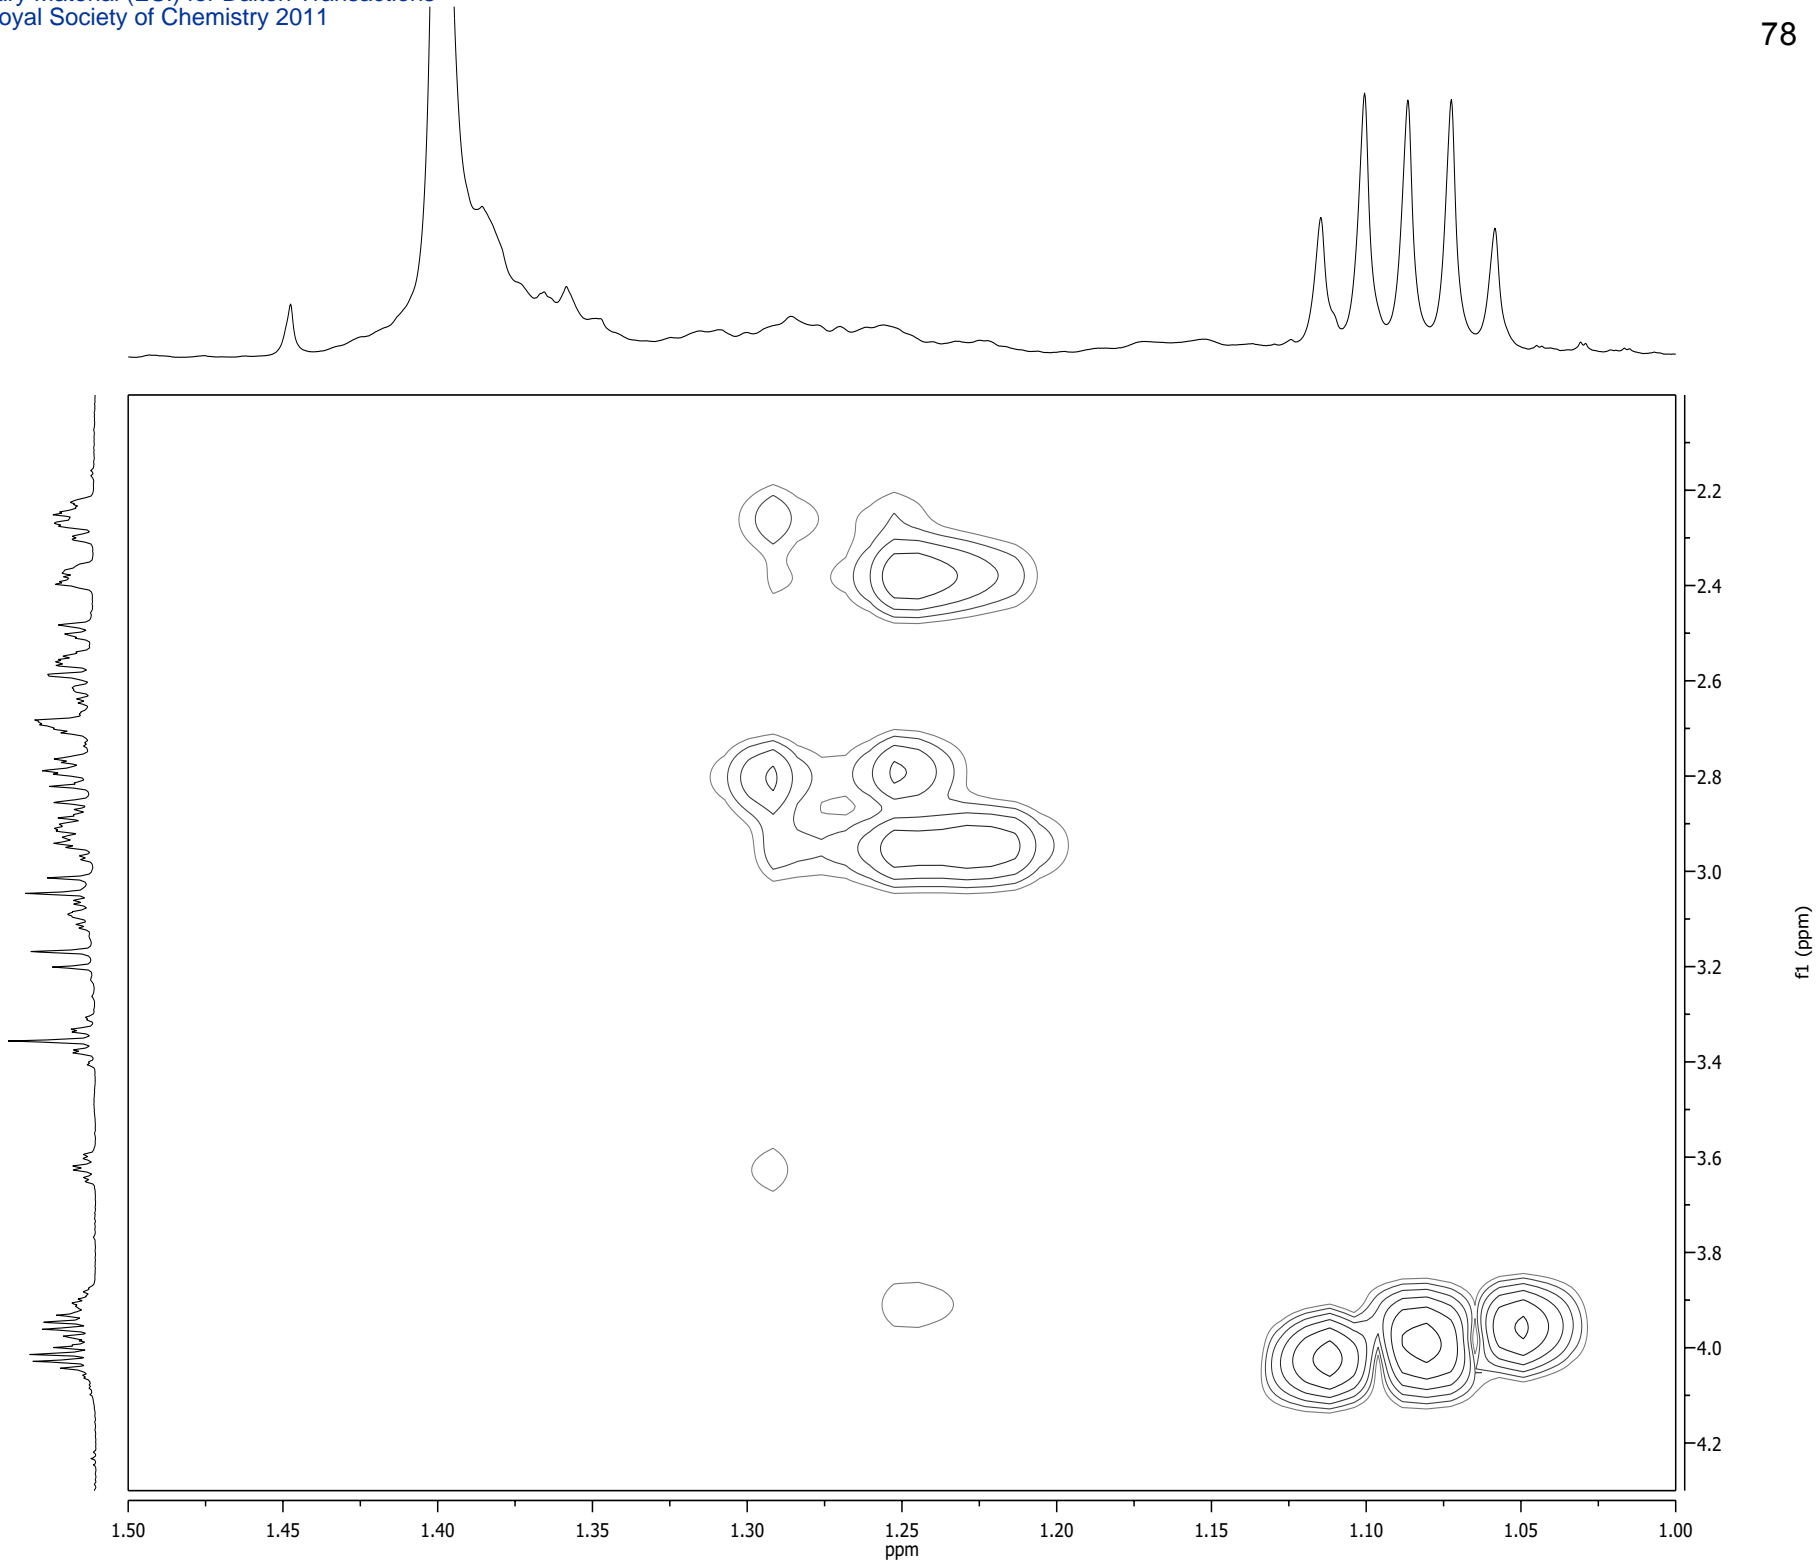

|    |                        |                                                    |
|----|------------------------|----------------------------------------------------|
| 1  | Data File Name         | RF-CB-TE1A1P_protected_PhMe_13C_2011-02-17/ CARBON |
| 2  | Origin                 | Varian                                             |
| 3  | Solvent                | C6D6                                               |
| 4  | Number of Scans        | 5000                                               |
| 5  | Receiver Gain          | 40                                                 |
| 6  | Acquisition Time       | 1.0000                                             |
| 7  | Acquisition Date       | 2011-02-17T11:00:46                                |
| 8  | Spectrometer Frequency | 125.68005                                          |
| 9  | Spectral Width         | 31446.5                                            |
| 10 | Lowest Frequency       | -3735.5                                            |
| 11 | Nucleus                | 13C                                                |
| 12 | Acquired Size          | 31447                                              |
| 13 | Spectral Size          | 65536                                              |

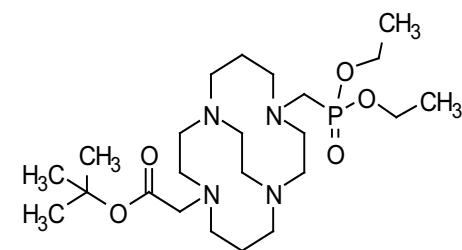

RF-CB-TE1A1P\_protected\_PhMe extracts  
 $^{13}\text{C}$  NMR, 125.68 MHz,  $\text{C}_6\text{D}_6$  with reference peak  
set at  $\delta$  128.06 (central peak)

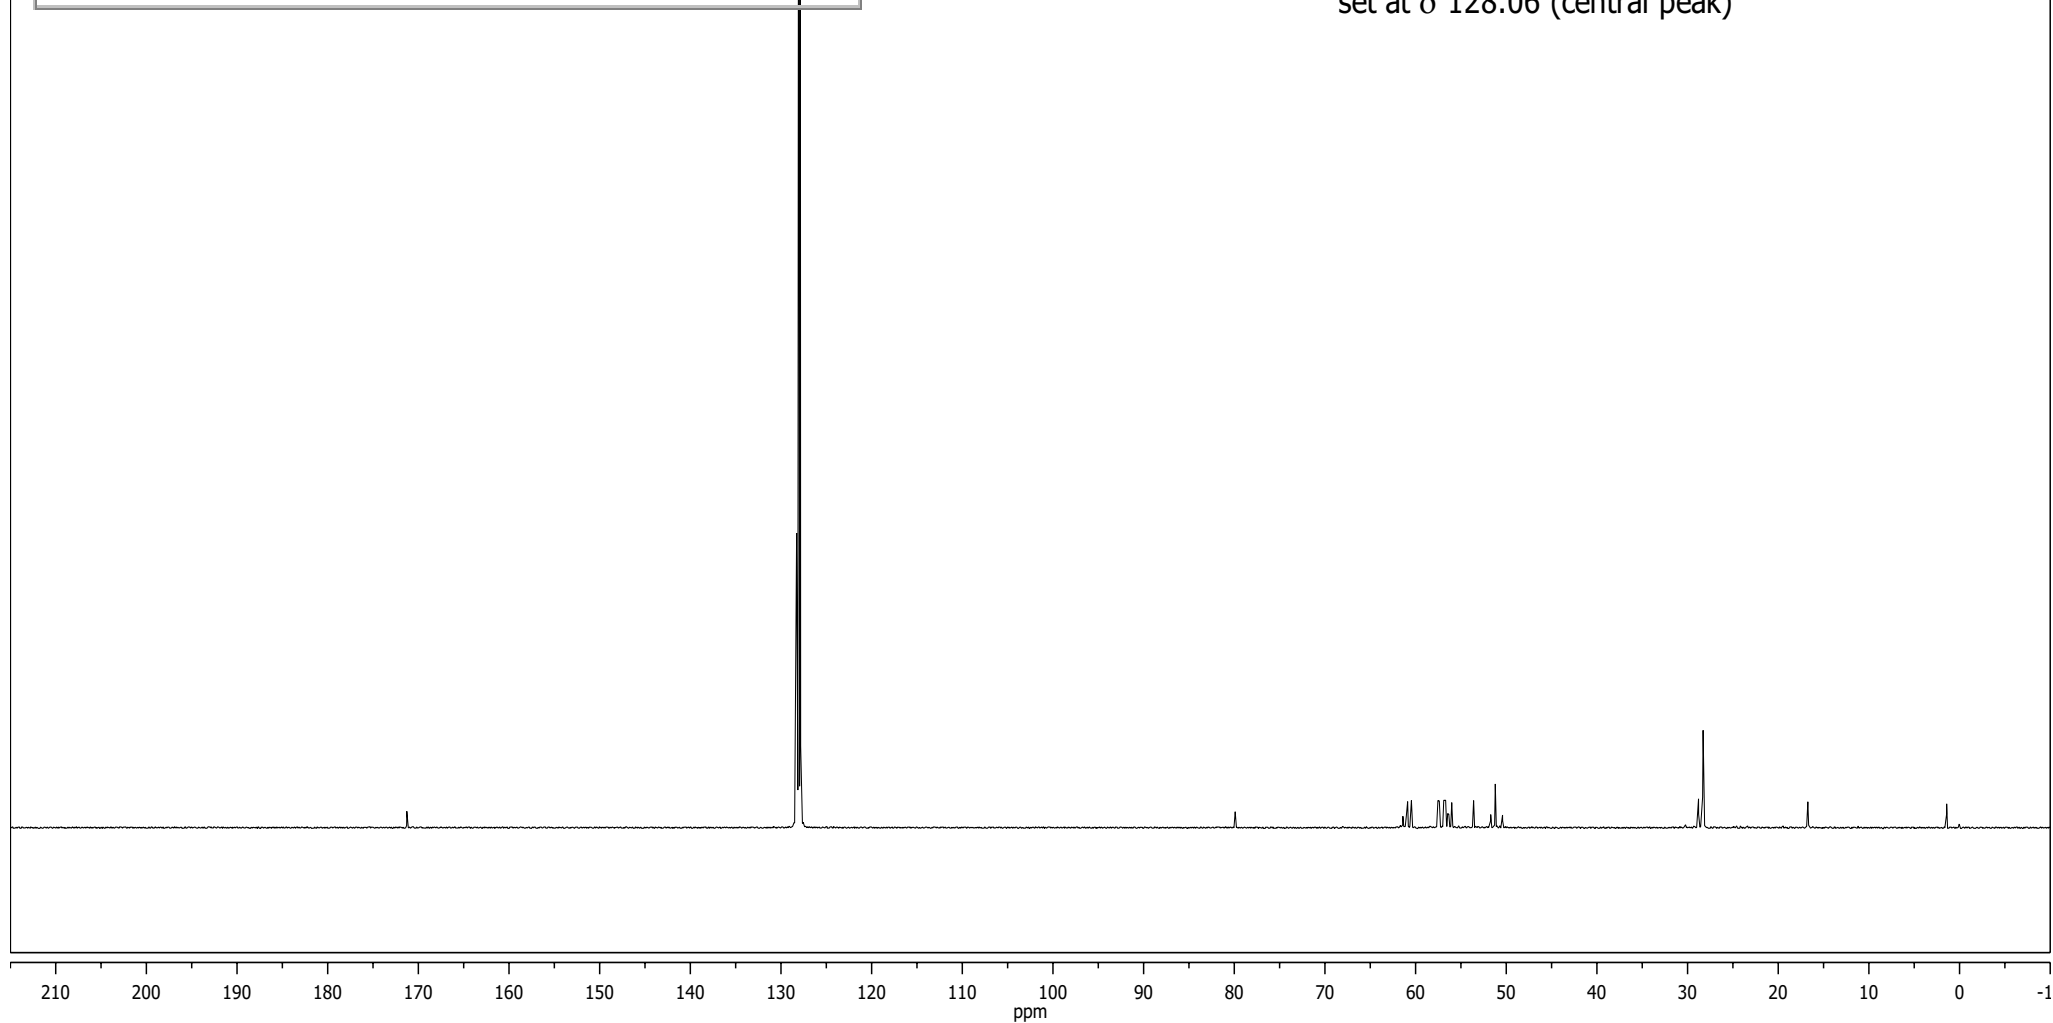

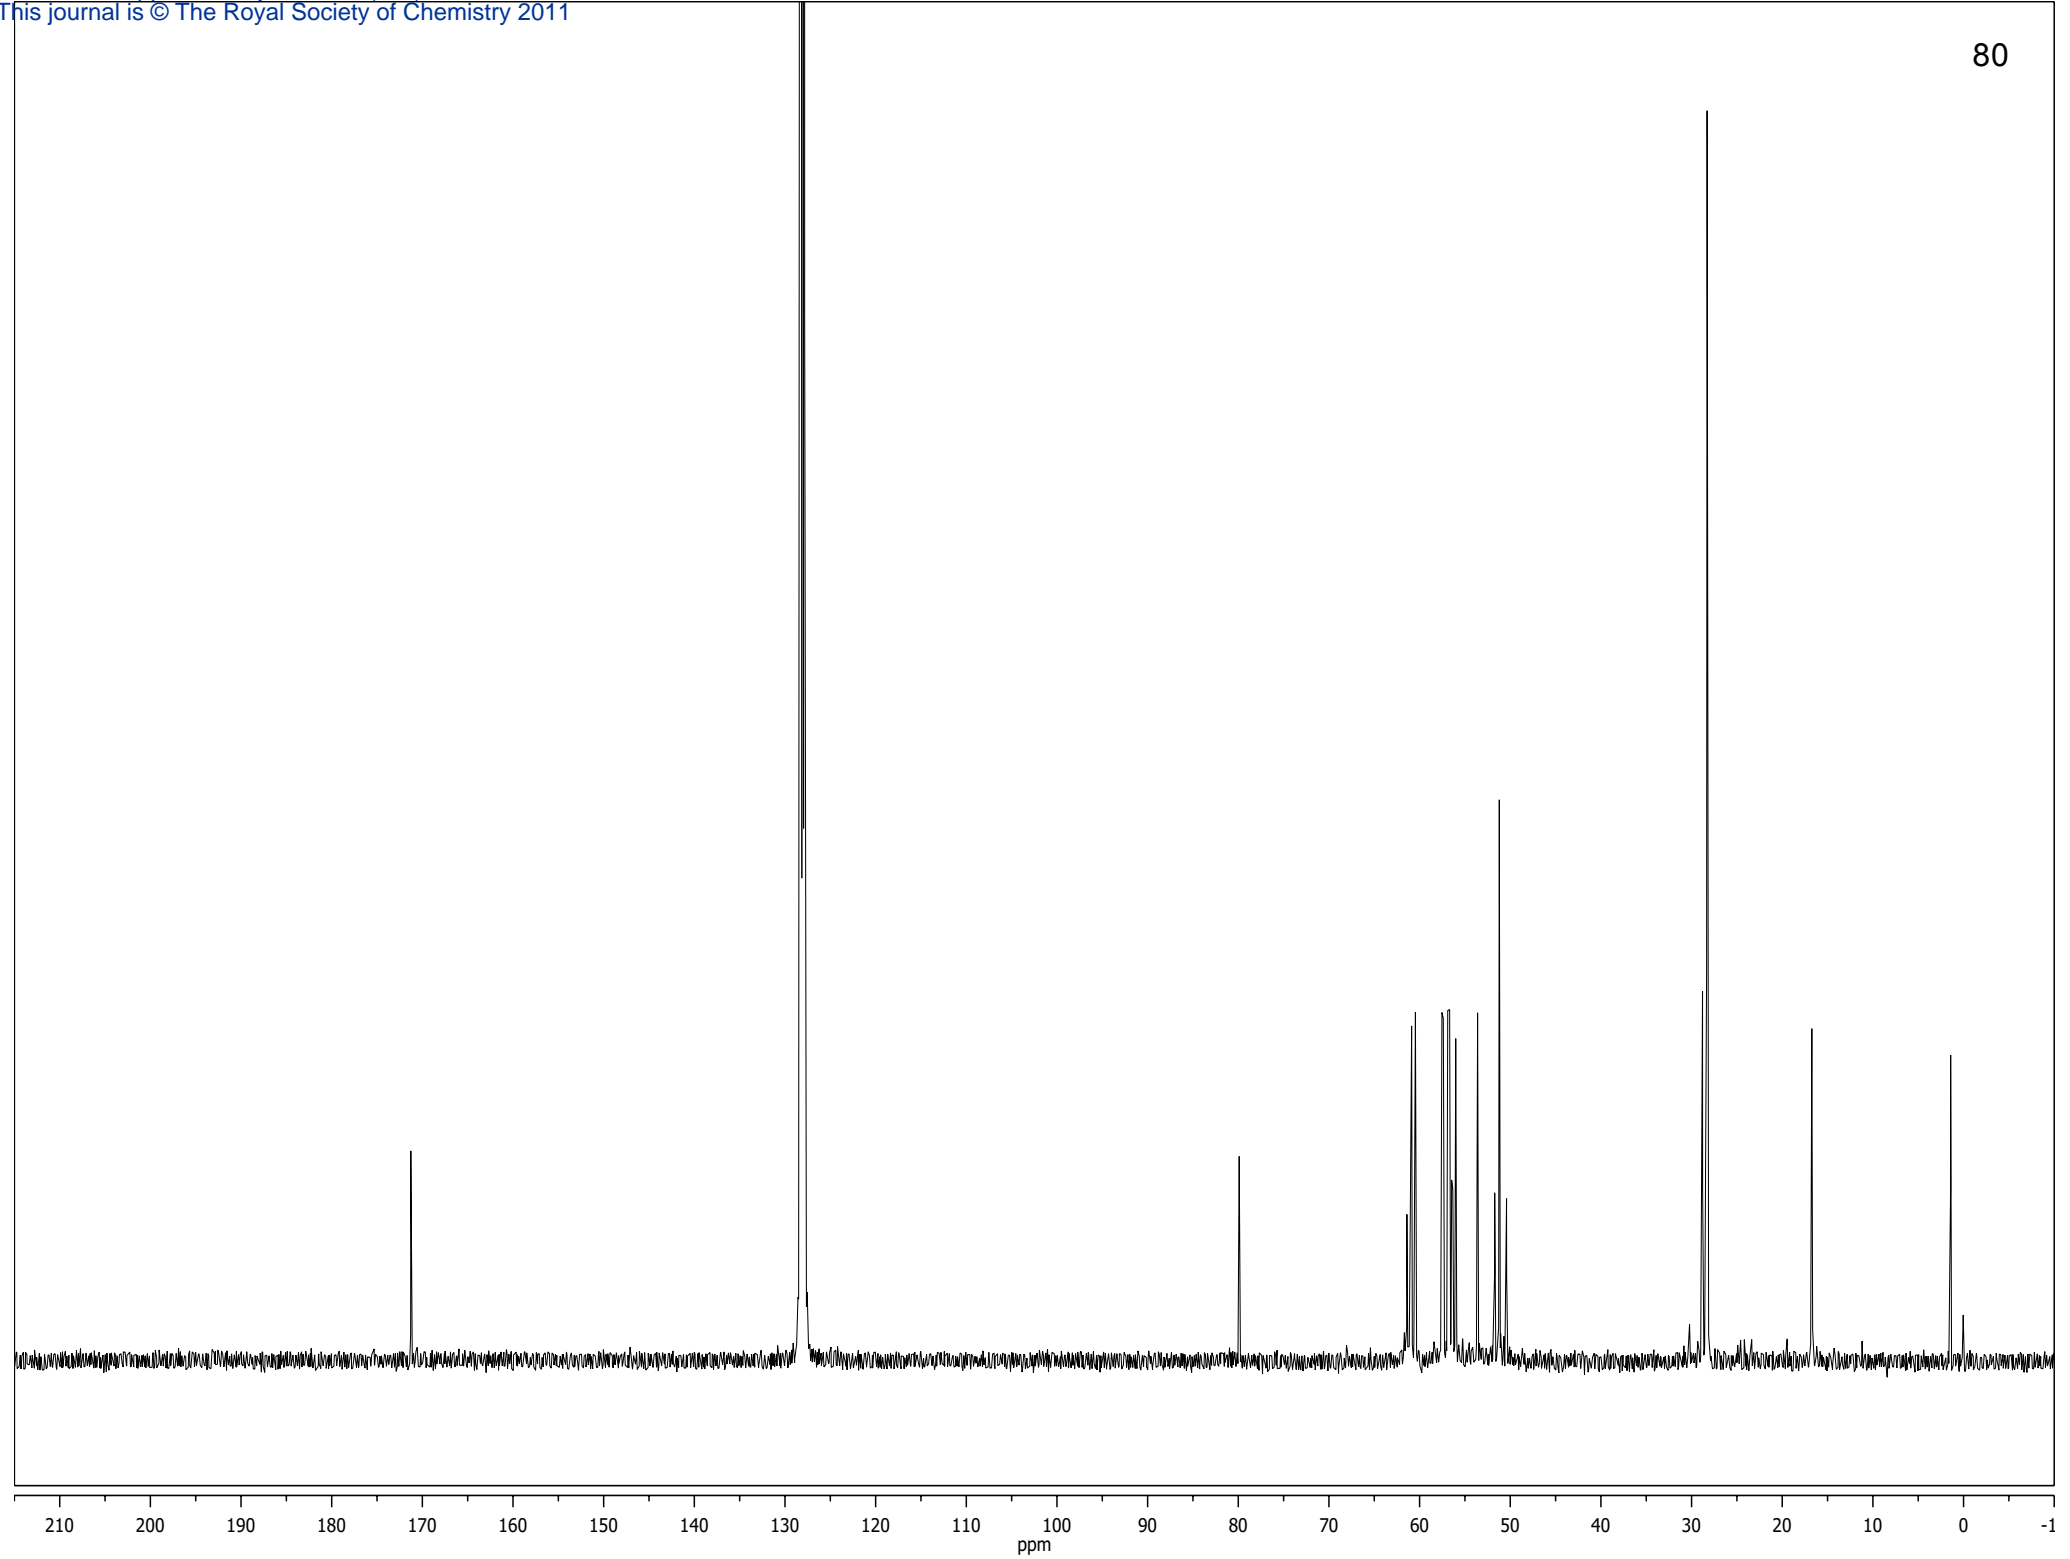

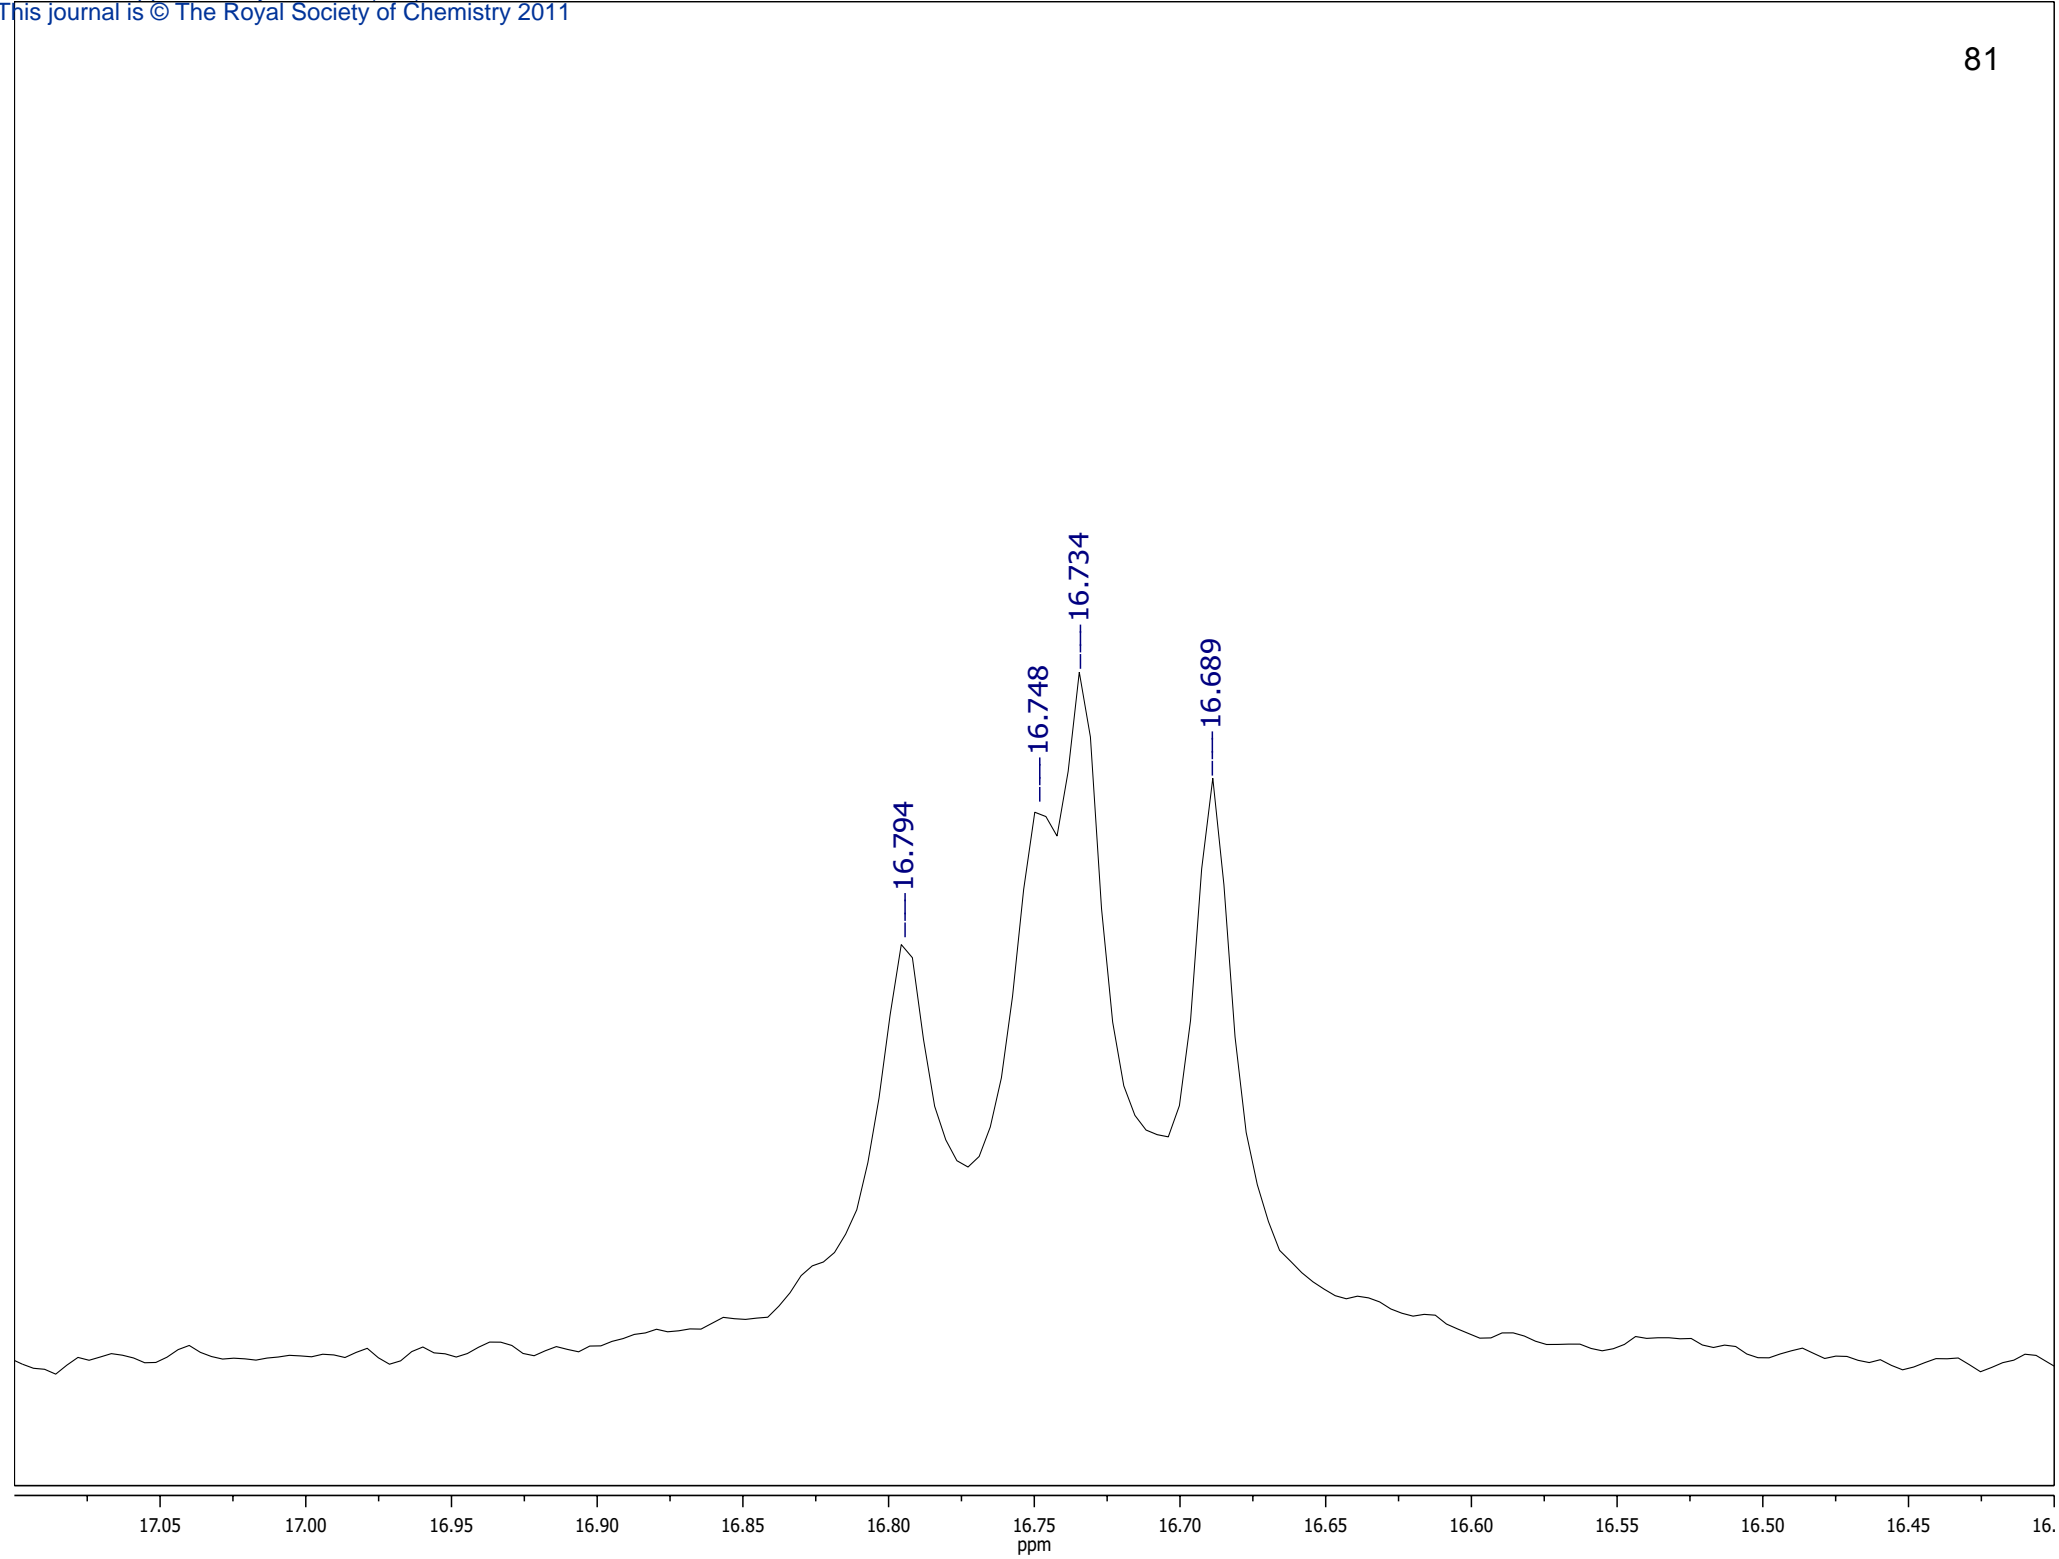

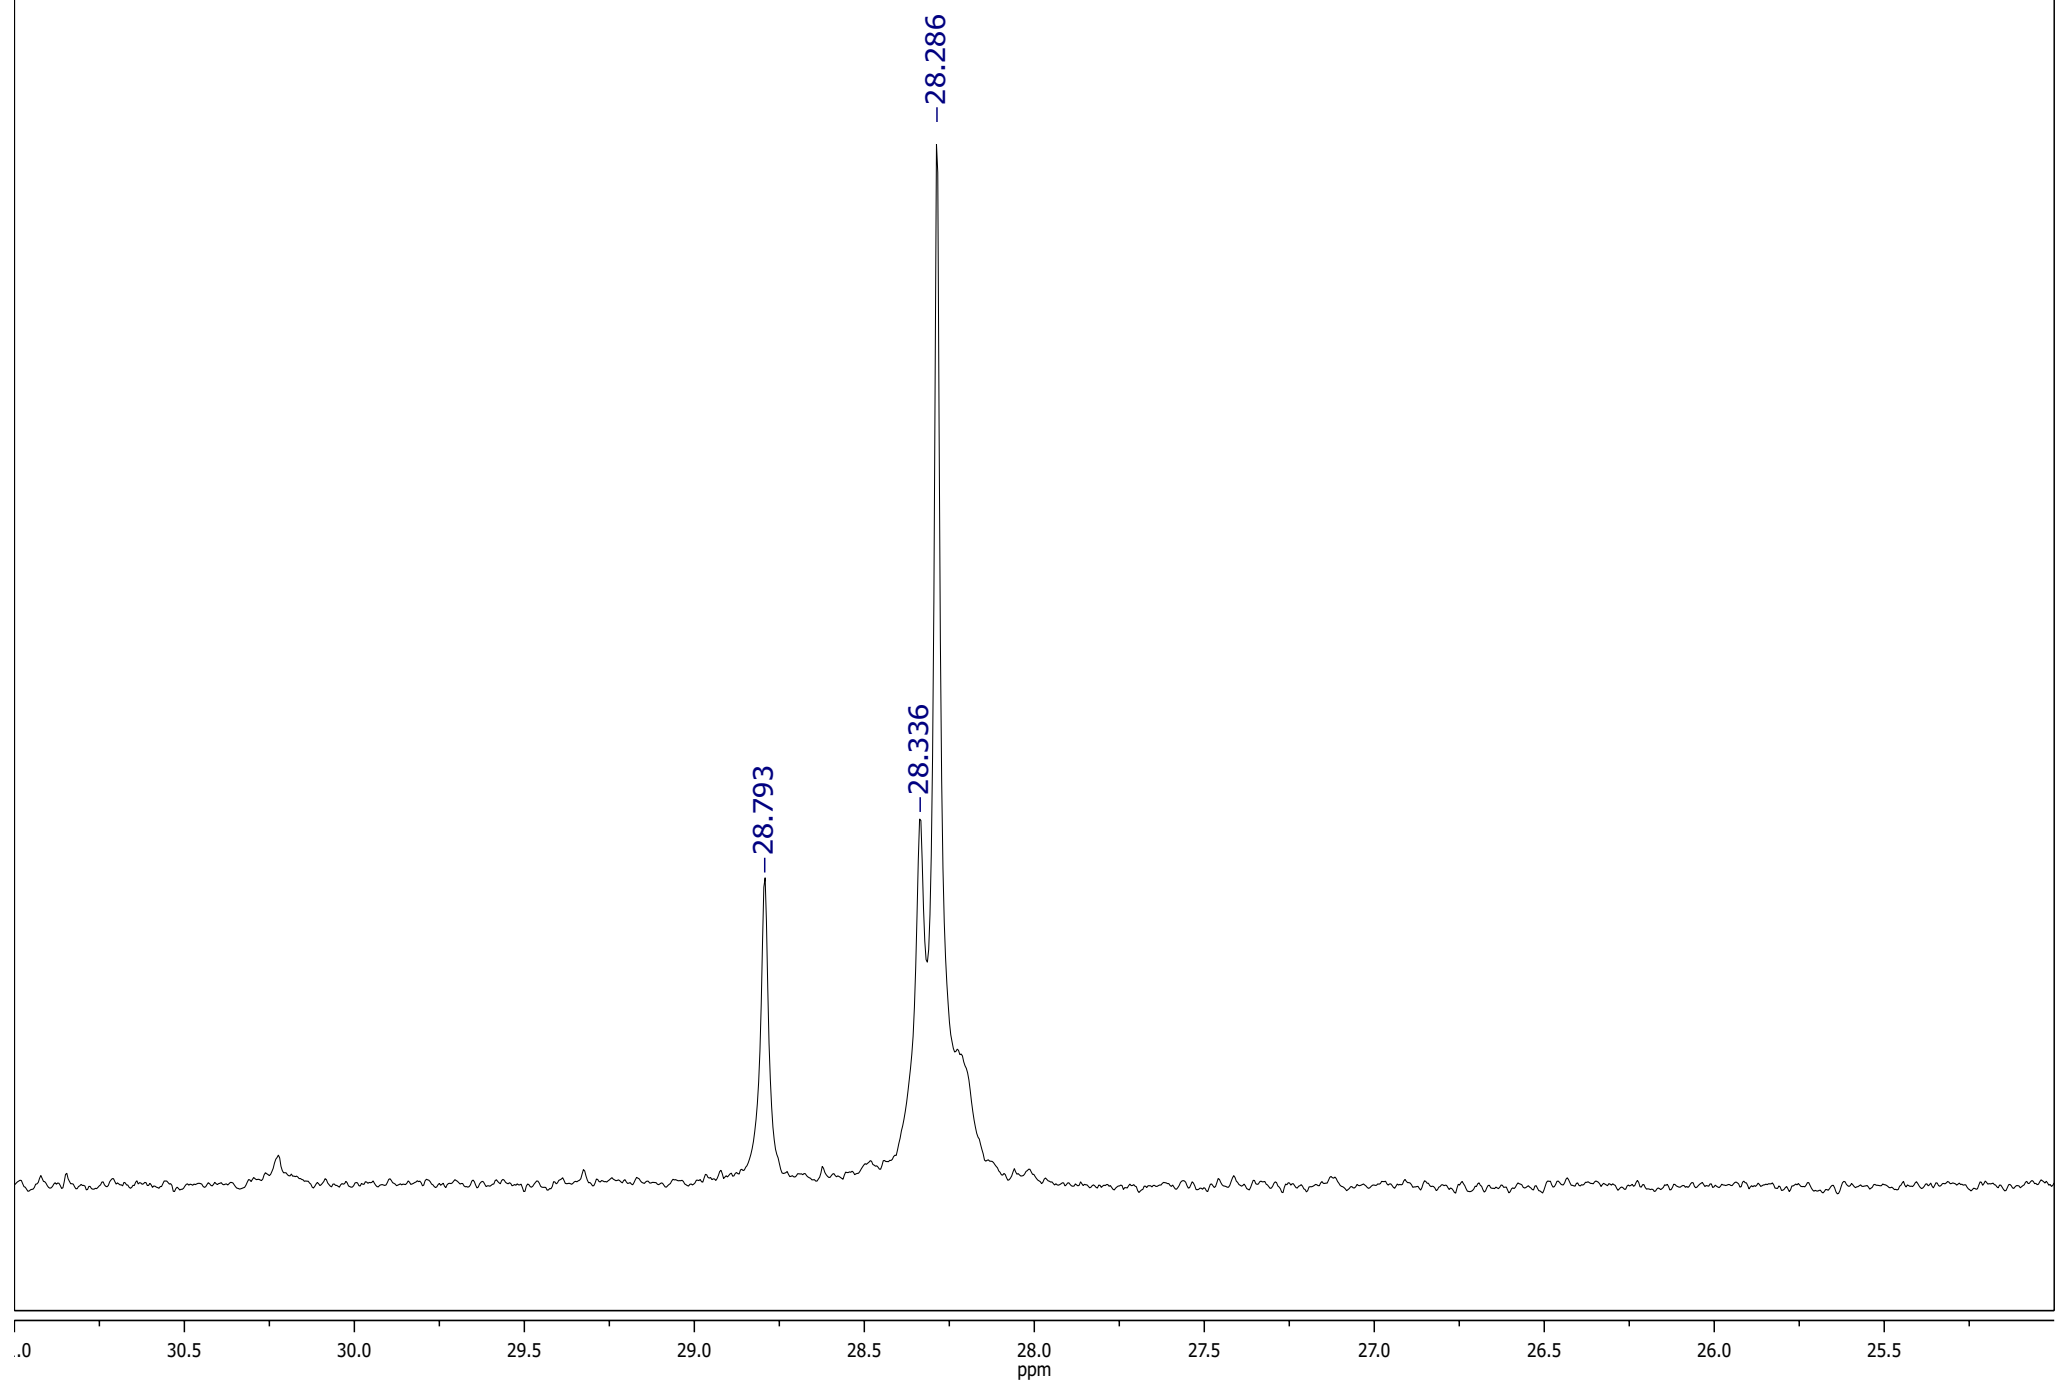

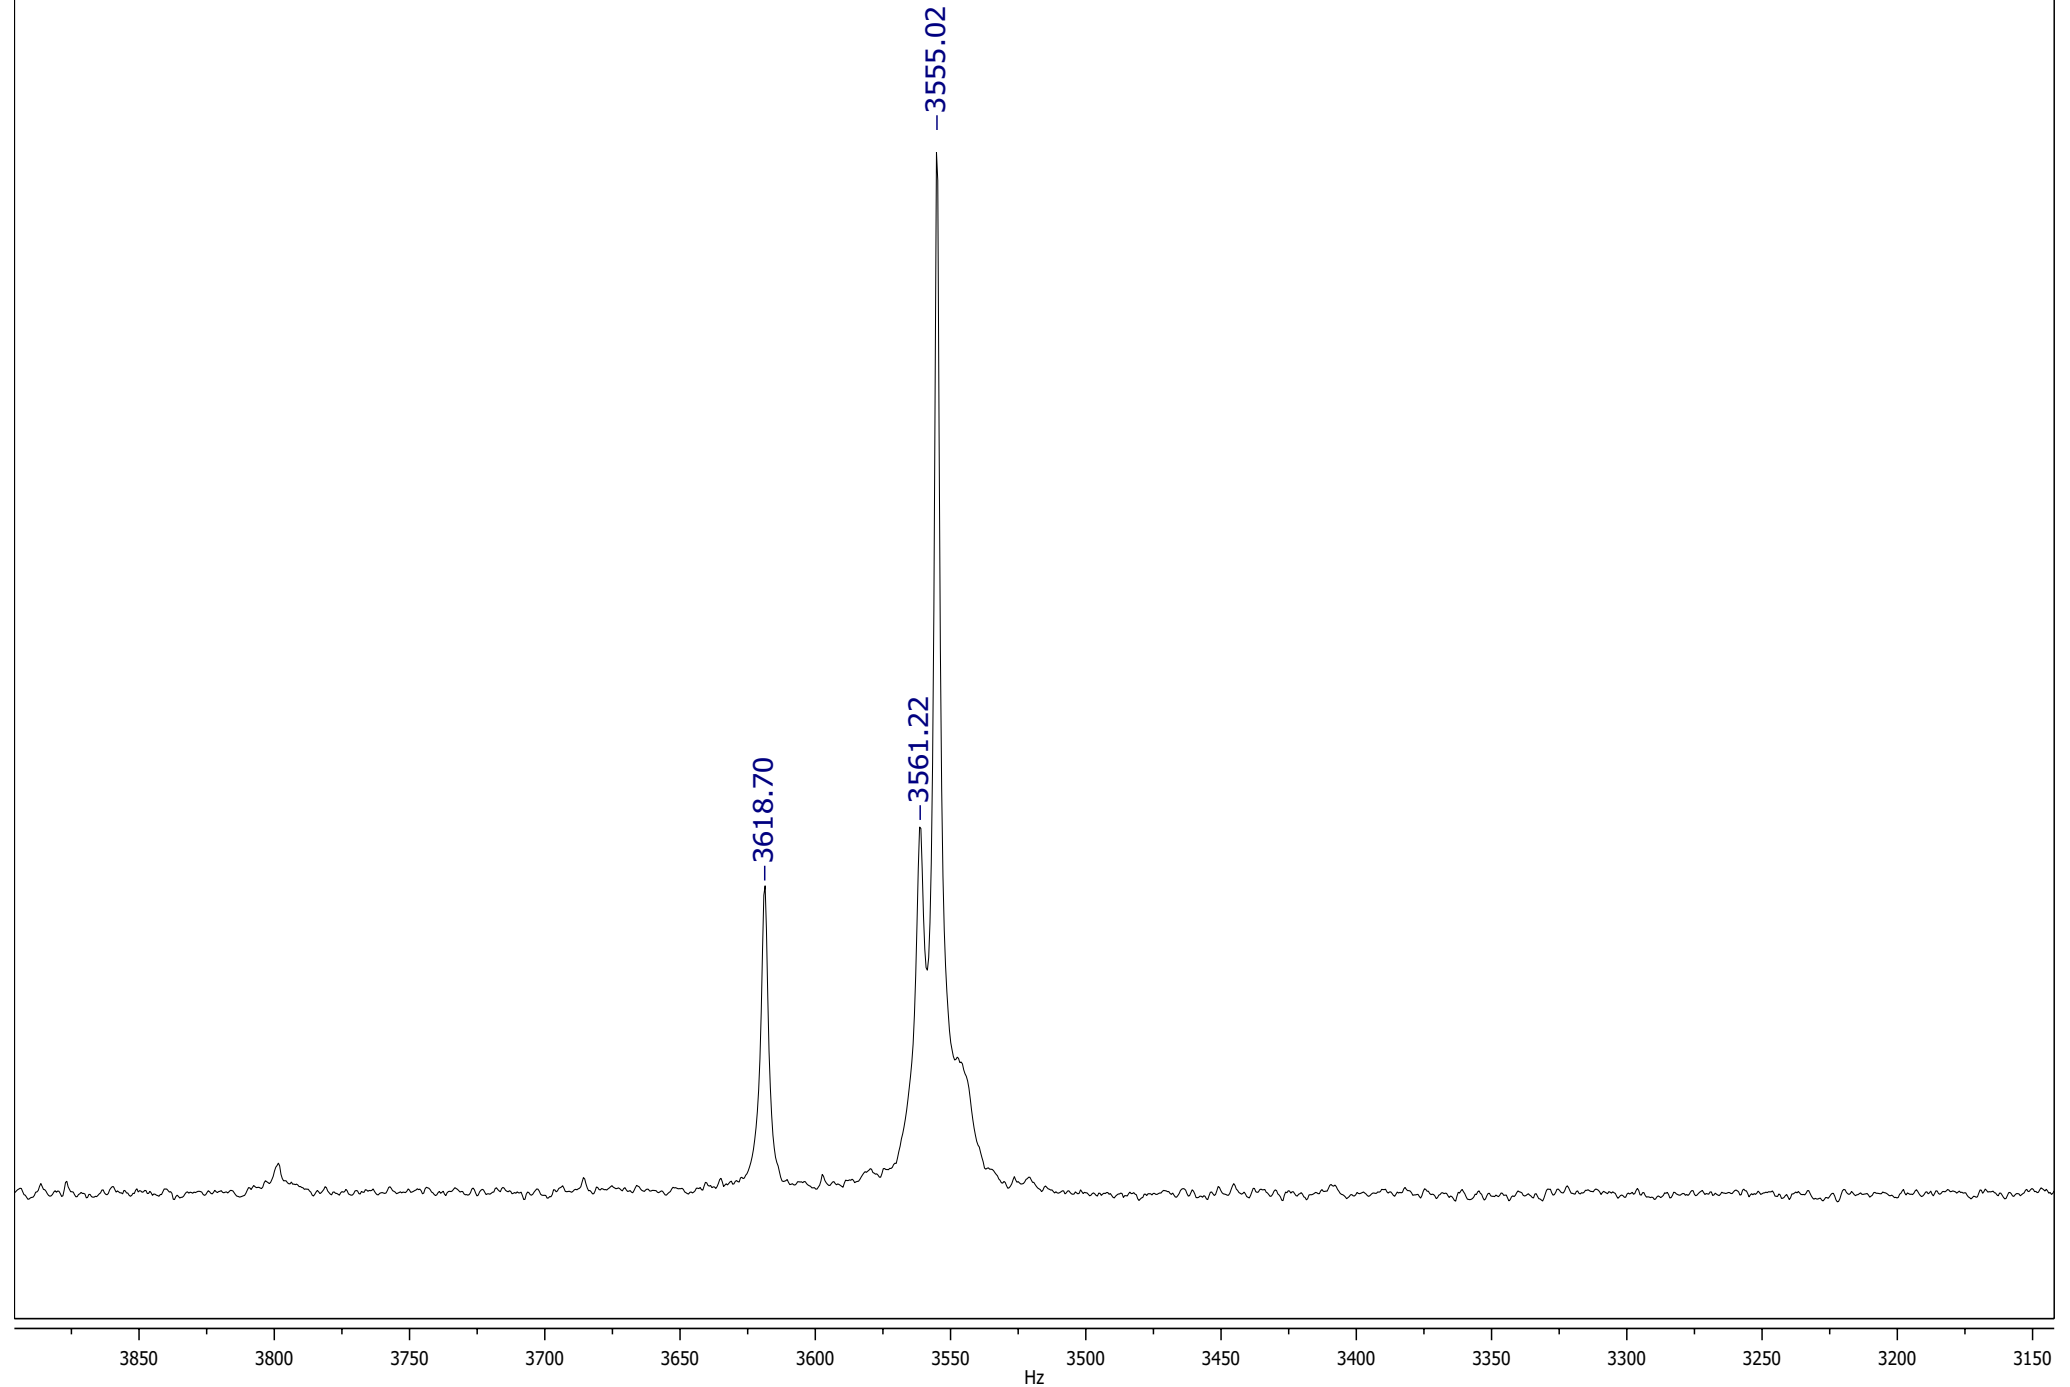

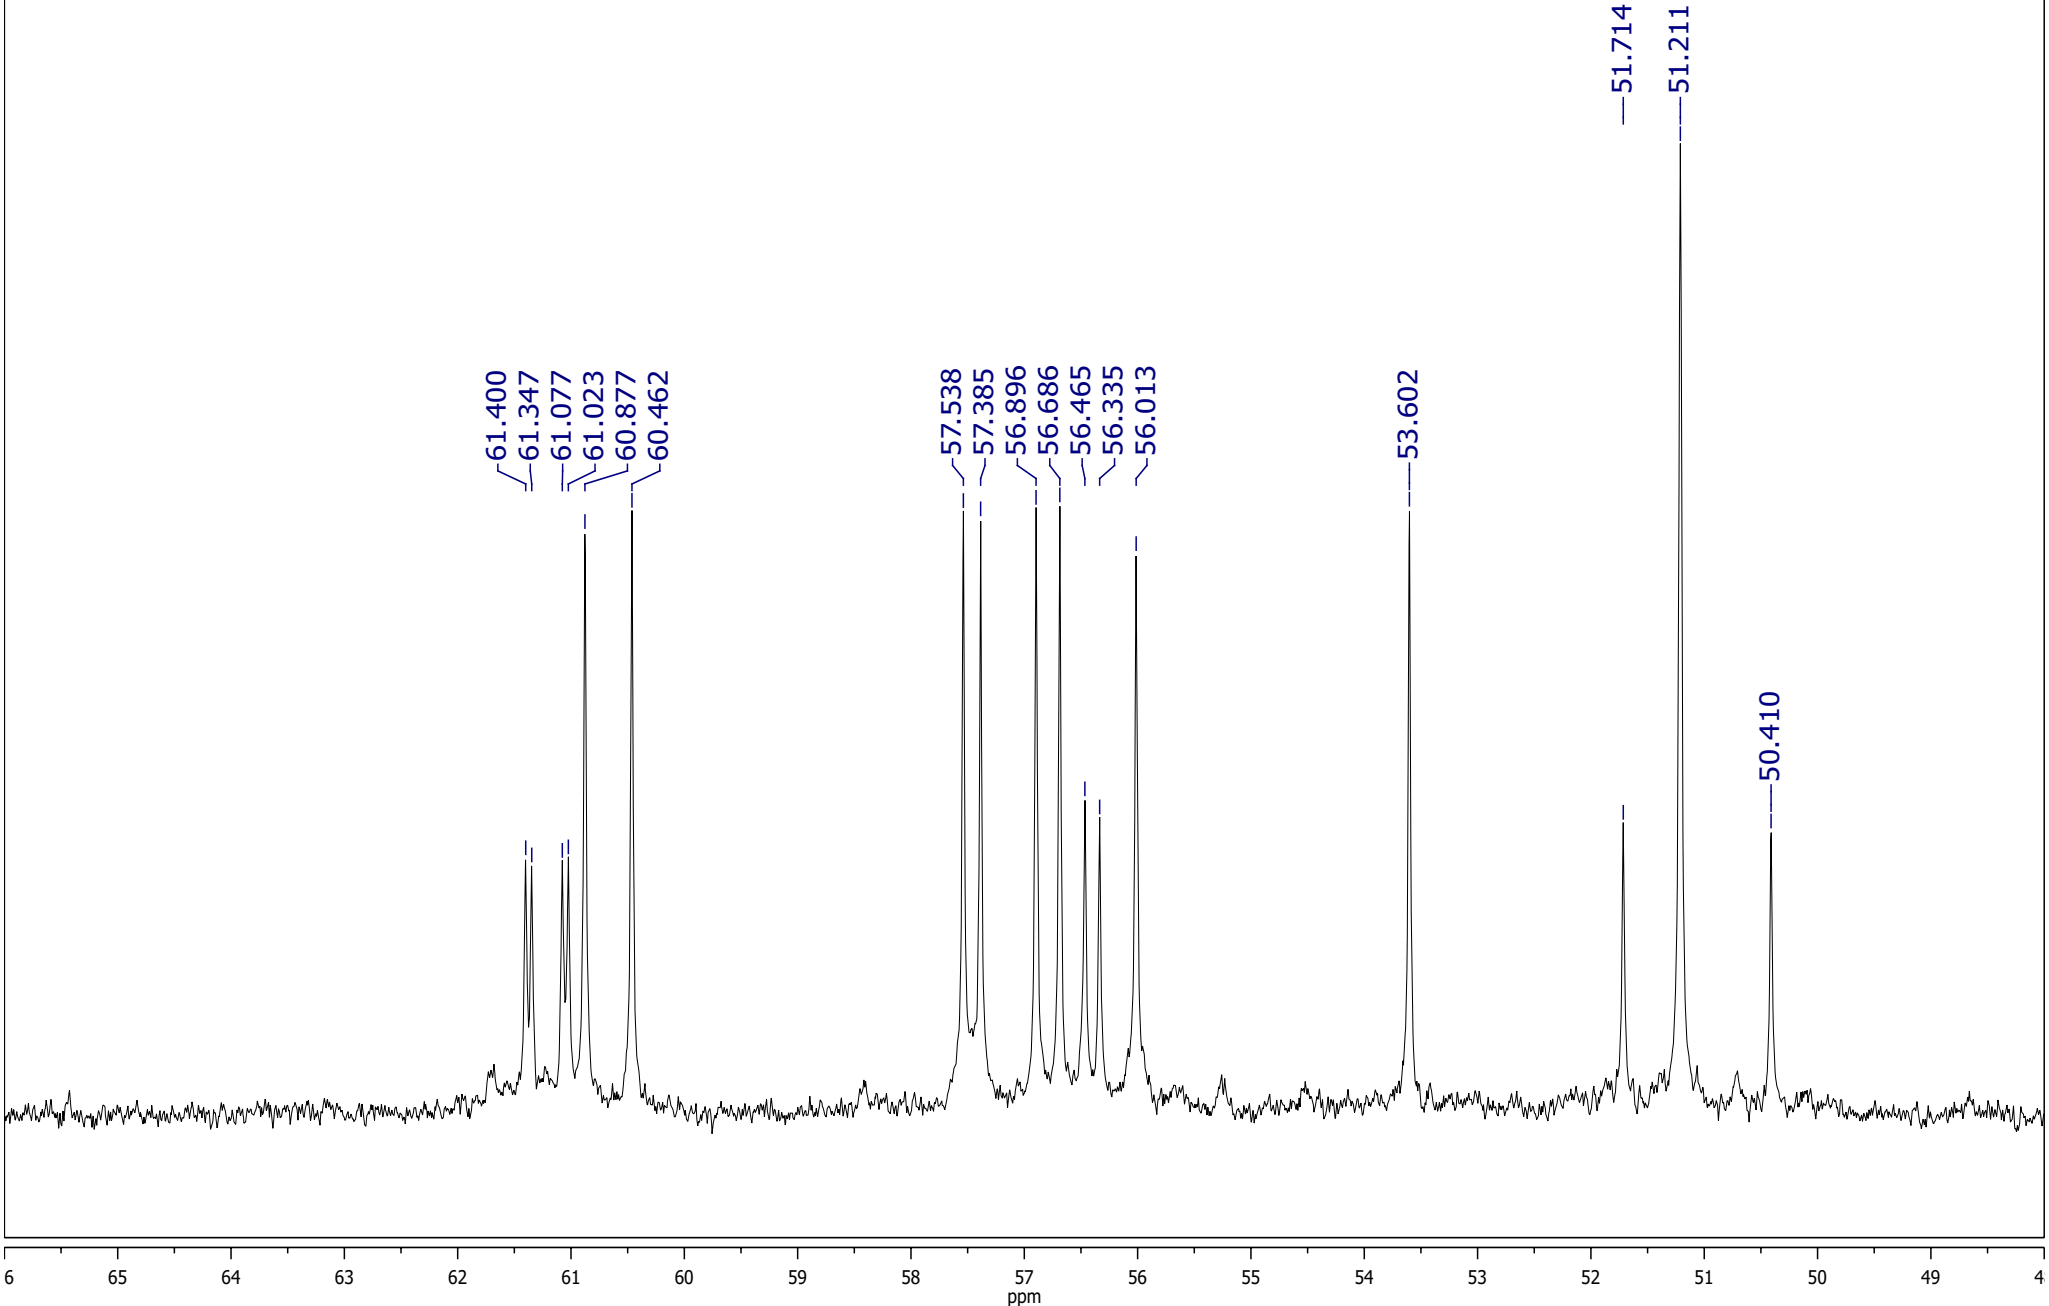

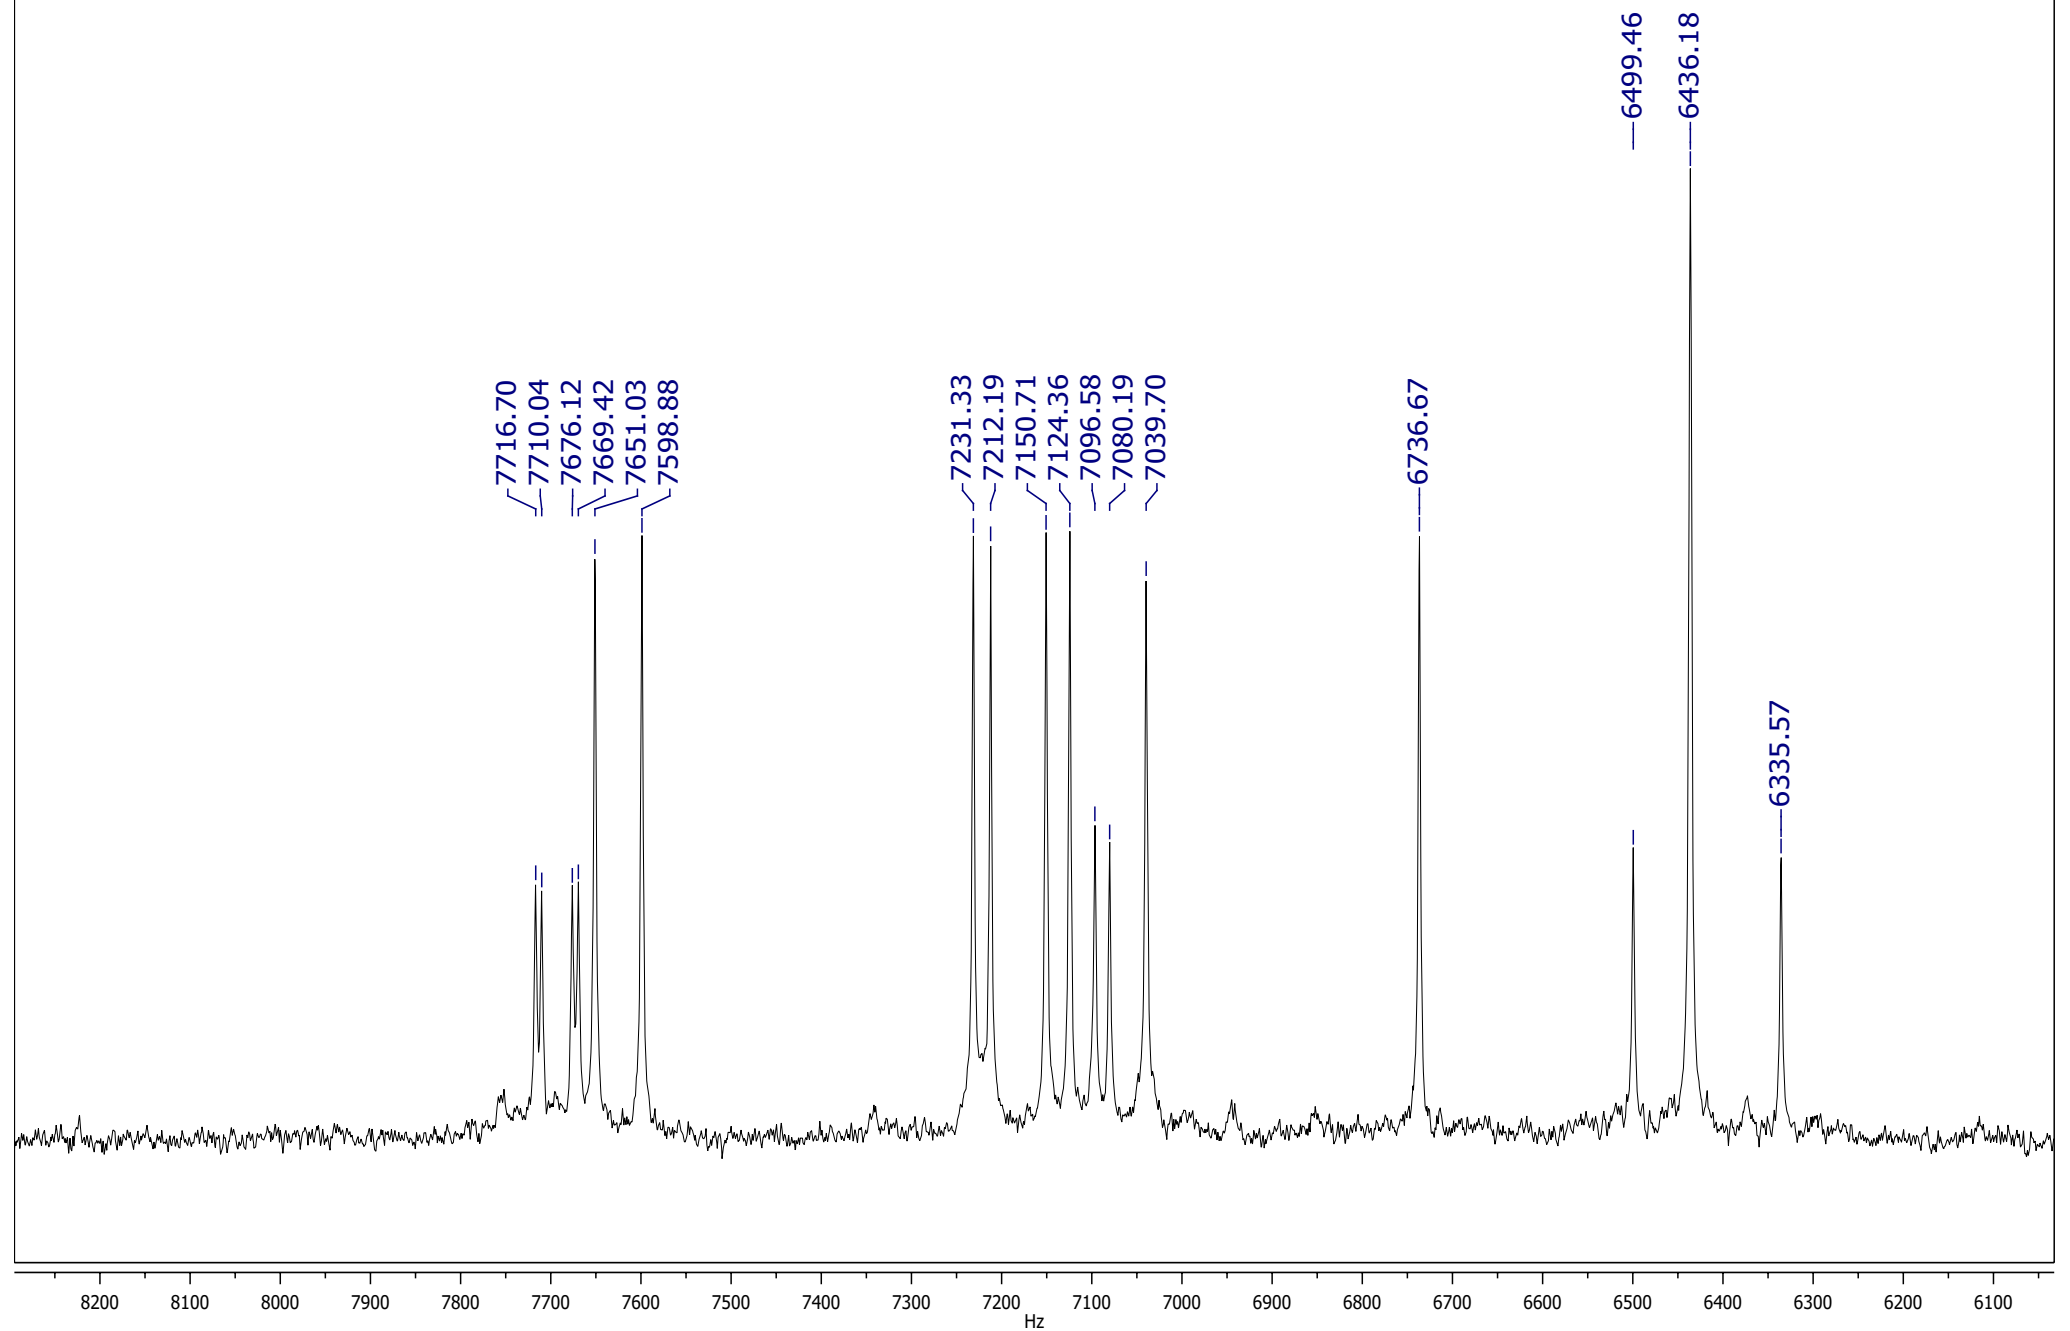

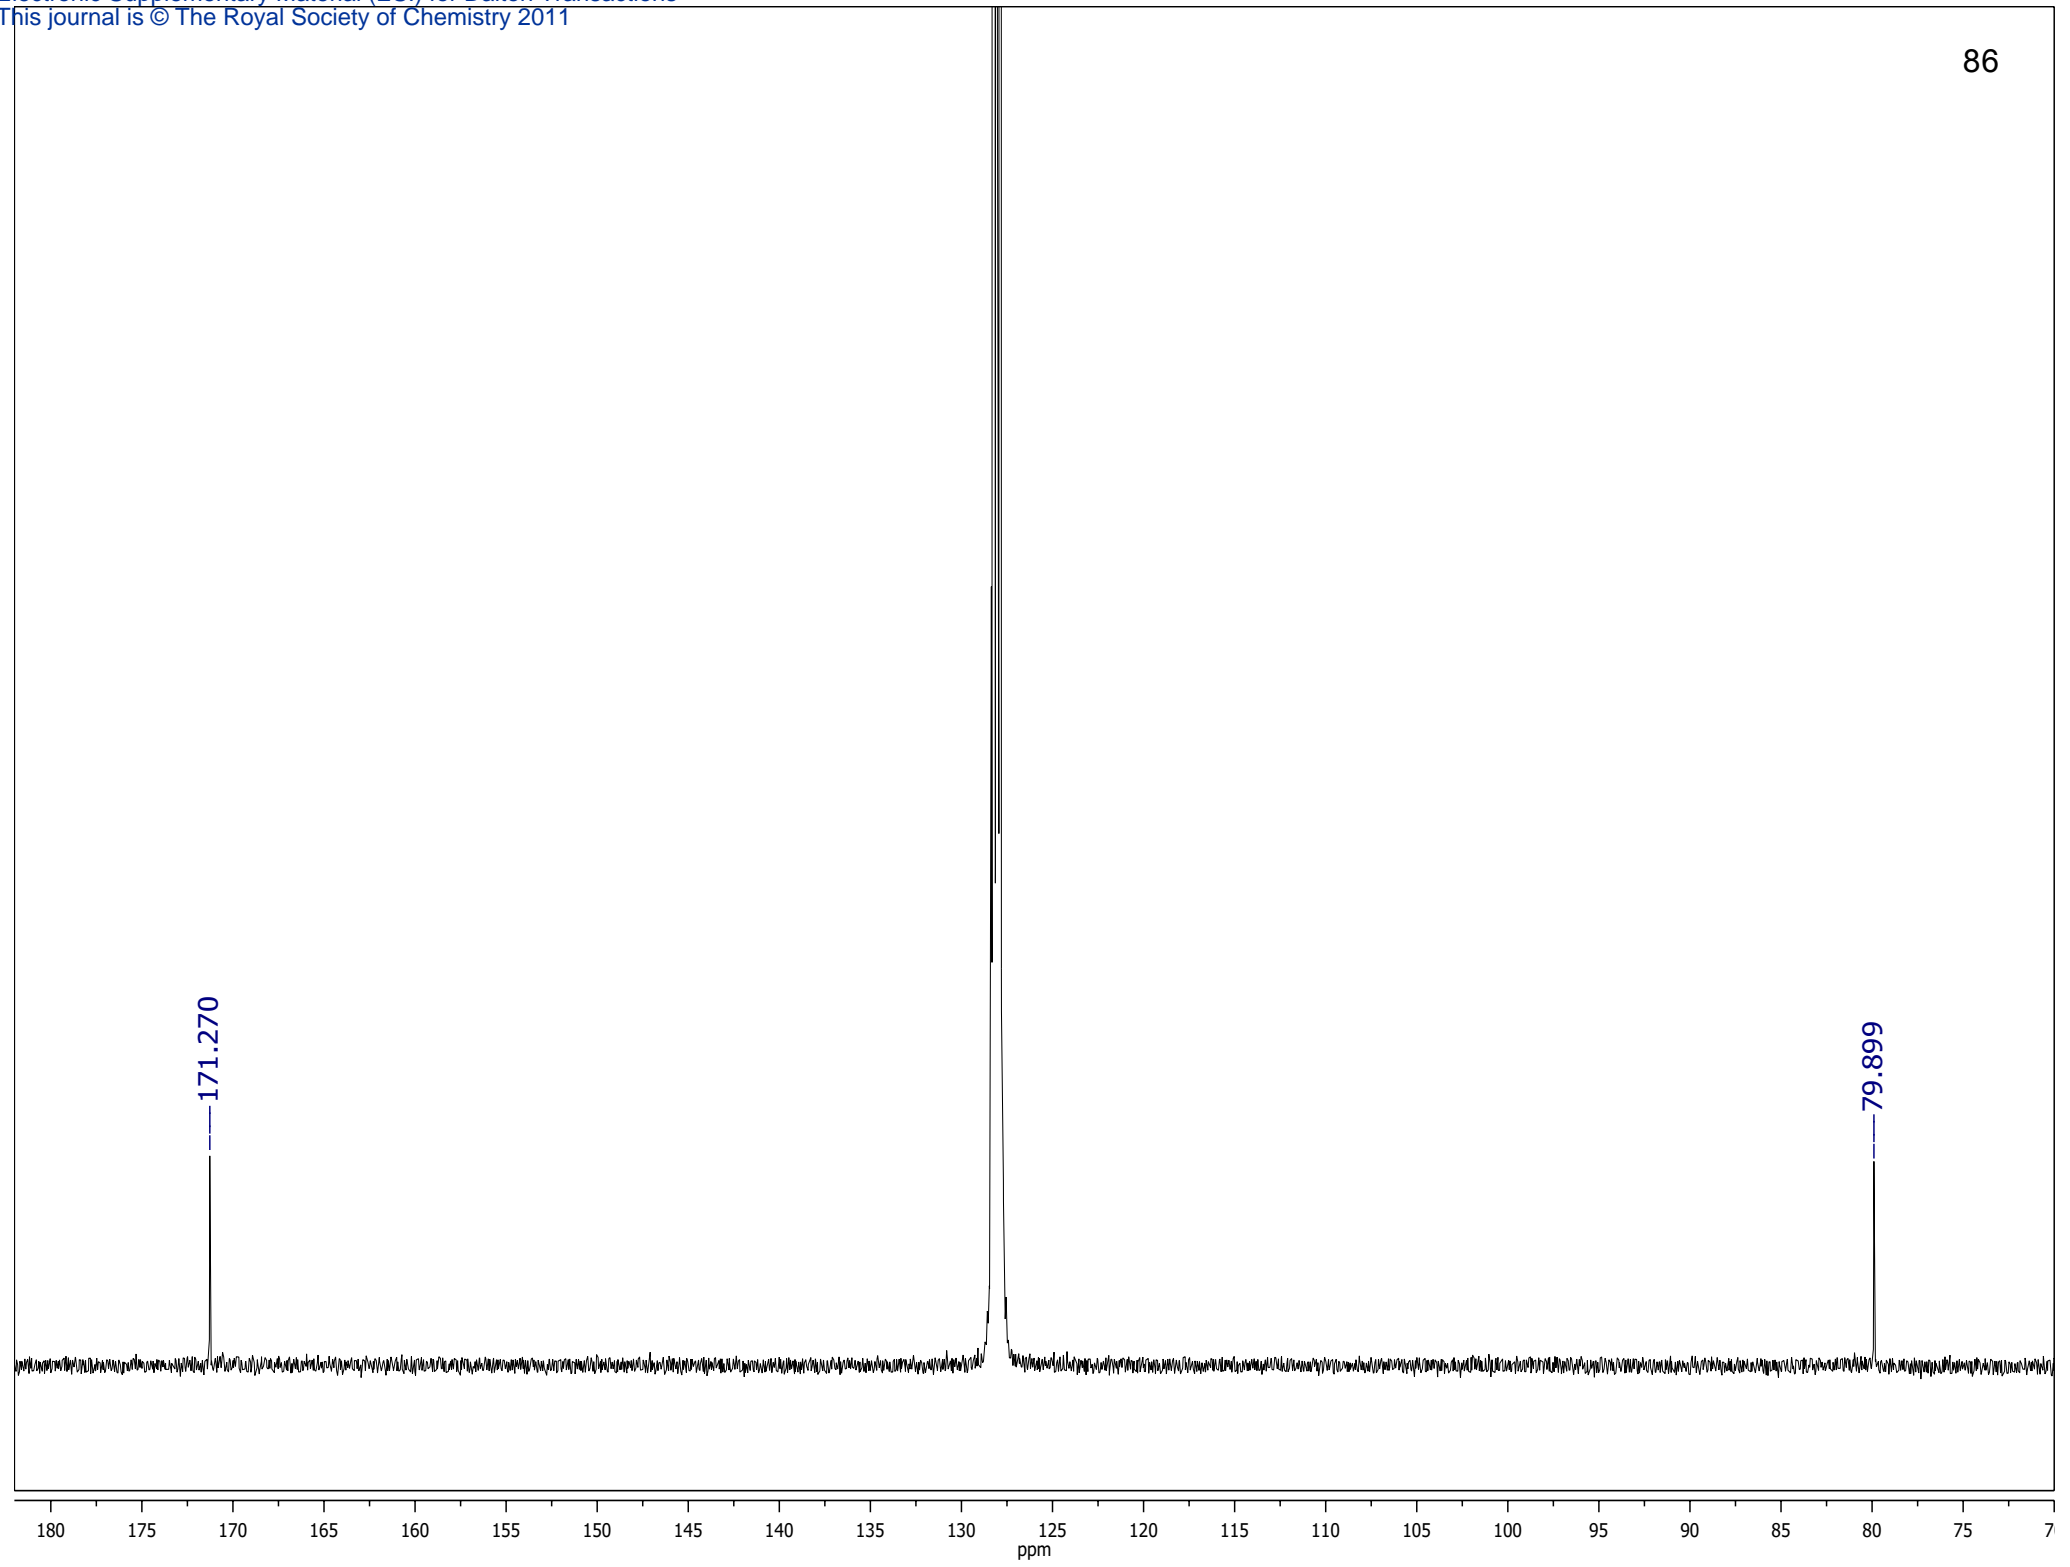

|    |                        |                                                    |
|----|------------------------|----------------------------------------------------|
| 1  | Data File Name         | RF-CB-TE1A1P_protected_PhMe_13C_2011-02-17/ CARBON |
| 2  | Origin                 | Varian                                             |
| 3  | Solvent                | C6D6                                               |
| 4  | Number of Scans        | 5000                                               |
| 5  | Receiver Gain          | 40                                                 |
| 6  | Acquisition Time       | 1.0000                                             |
| 7  | Acquisition Date       | 2011-02-17T11:00:46                                |
| 8  | Spectrometer Frequency | 125.68005                                          |
| 9  | Spectral Width         | 31446.5                                            |
| 10 | Lowest Frequency       | -3735.5                                            |
| 11 | Nucleus                | 13C                                                |
| 12 | Acquired Size          | 31447                                              |
| 13 | Spectral Size          | 65536                                              |

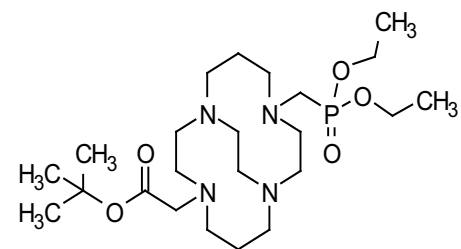

RF-CB-TE1A1P\_protected\_PhMe extracts  
 $^{13}\text{C}$  NMR, 125.68 MHz,  $\text{C}_6\text{D}_6$  with reference peak set at  
128.06 ppm (central peak)

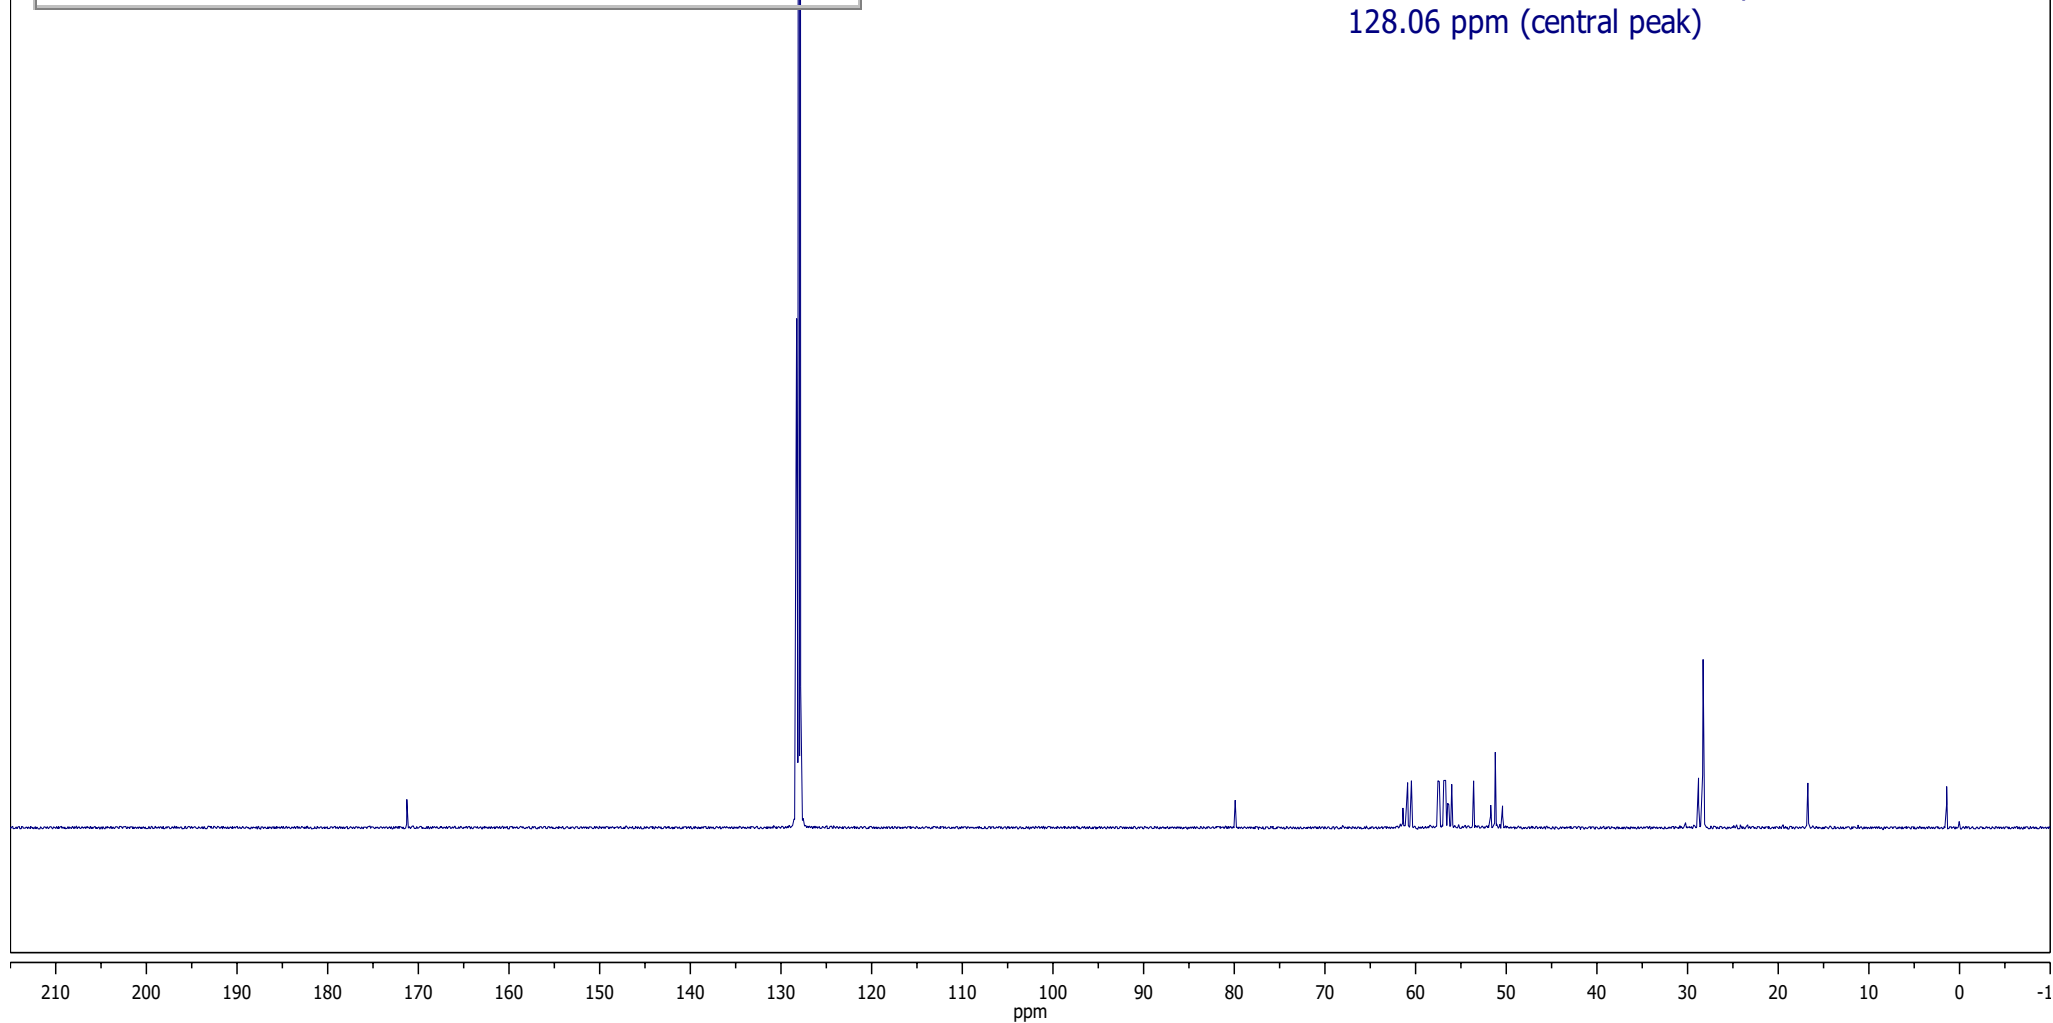

|    |                        |                                                      |
|----|------------------------|------------------------------------------------------|
| 1  | Data File Name         | RF-CB-TE1A1P_protected_400_13C_17Feb2011/ CARBON.fid |
| 2  | Origin                 | Varian                                               |
| 3  | Solvent                | C6D6                                                 |
| 4  | Number of Scans        | 5000                                                 |
| 5  | Receiver Gain          | 24                                                   |
| 6  | Acquisition Time       | 1.0025                                               |
| 7  | Acquisition Date       | 1969-11-13T03:20:24                                  |
| 8  | Spectrometer Frequency | 100.52631                                            |
| 9  | Spectral Width         | 25062.7                                              |
| 10 | Lowest Frequency       | -1402.7                                              |
| 11 | Nucleus                | 13C                                                  |
| 12 | Acquired Size          | 25126                                                |
| 13 | Spectral Size          | 65536                                                |

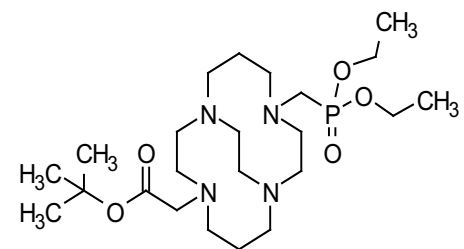

RF-CB-TE1A1P\_protected\_PhMe extracts  
<sup>13</sup>C NMR, 100.52 MHz, C<sub>6</sub>D<sub>6</sub> with reference peak set at  
128.06 ppm (central peak)

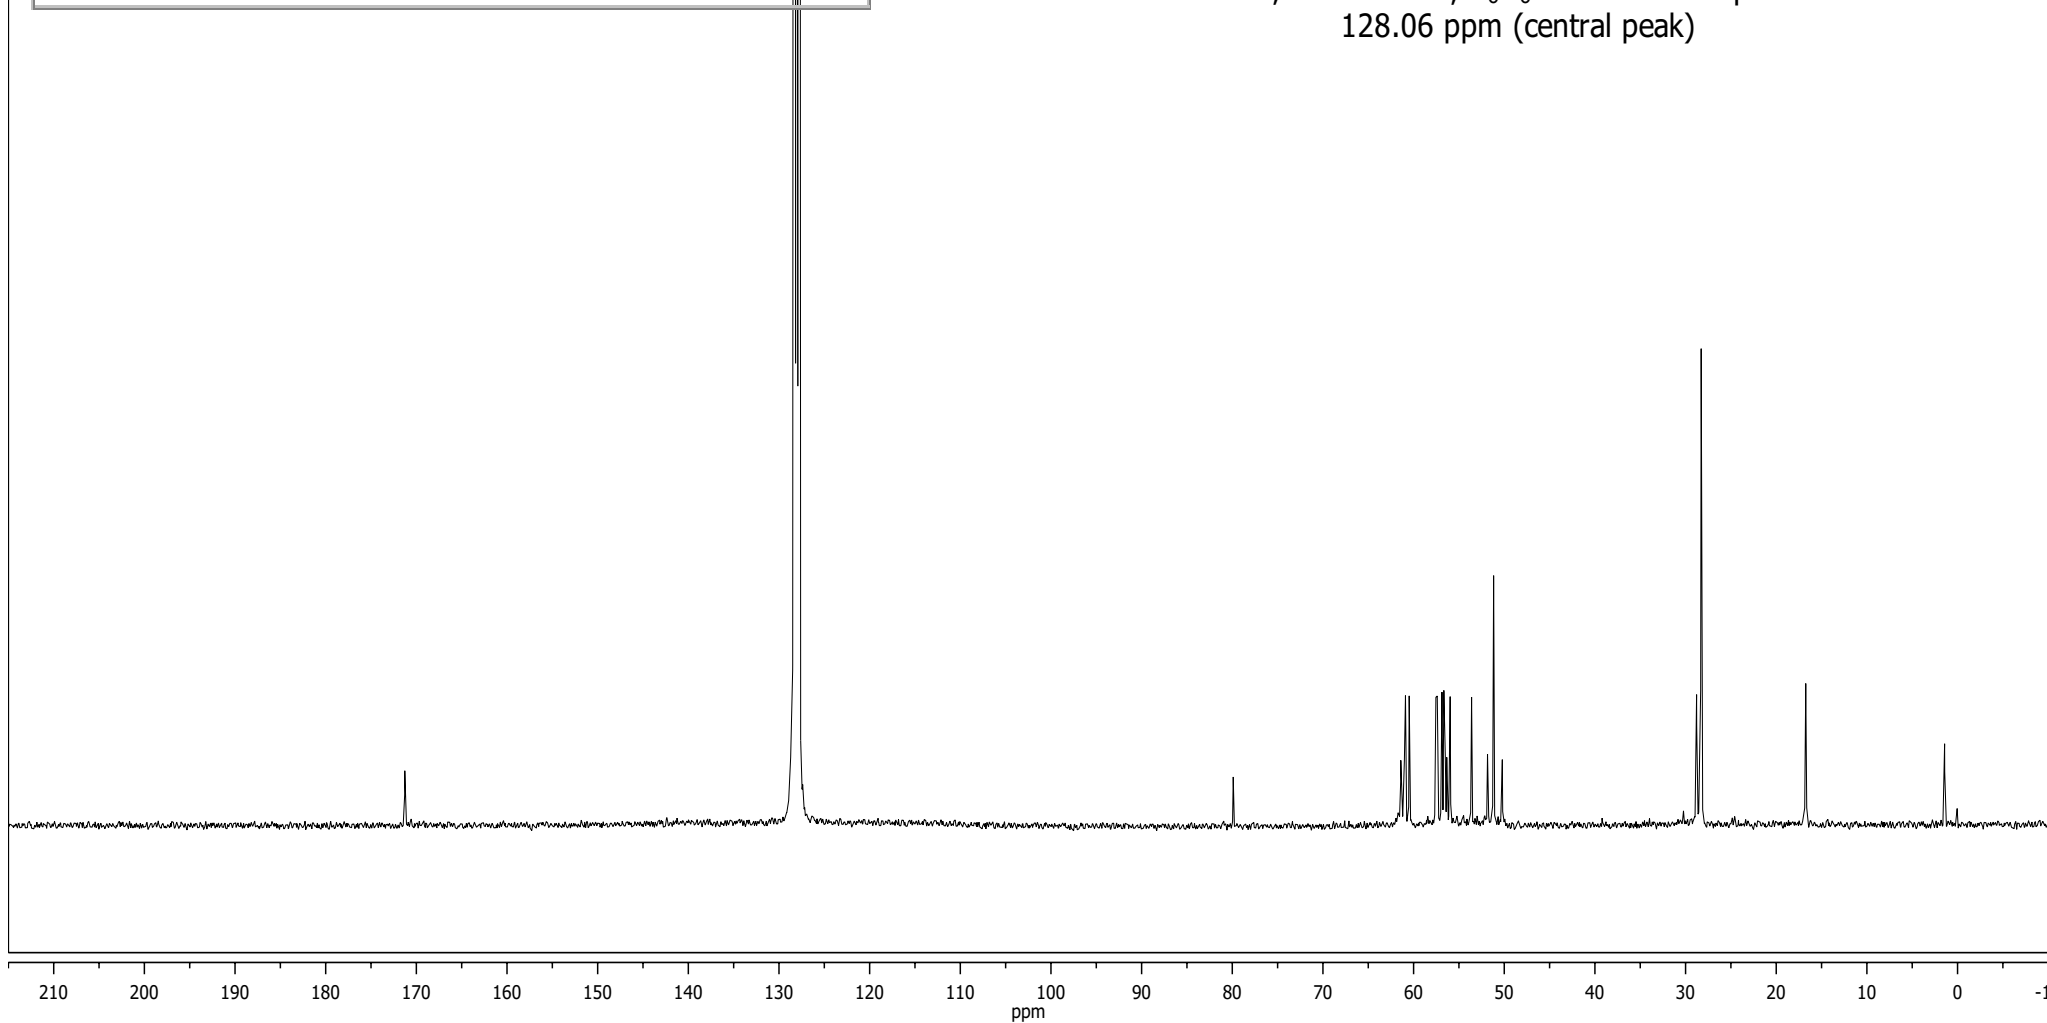

black - 100.5 MHz  
blue 125.7 MHz

apodisation for both = 3 Hz

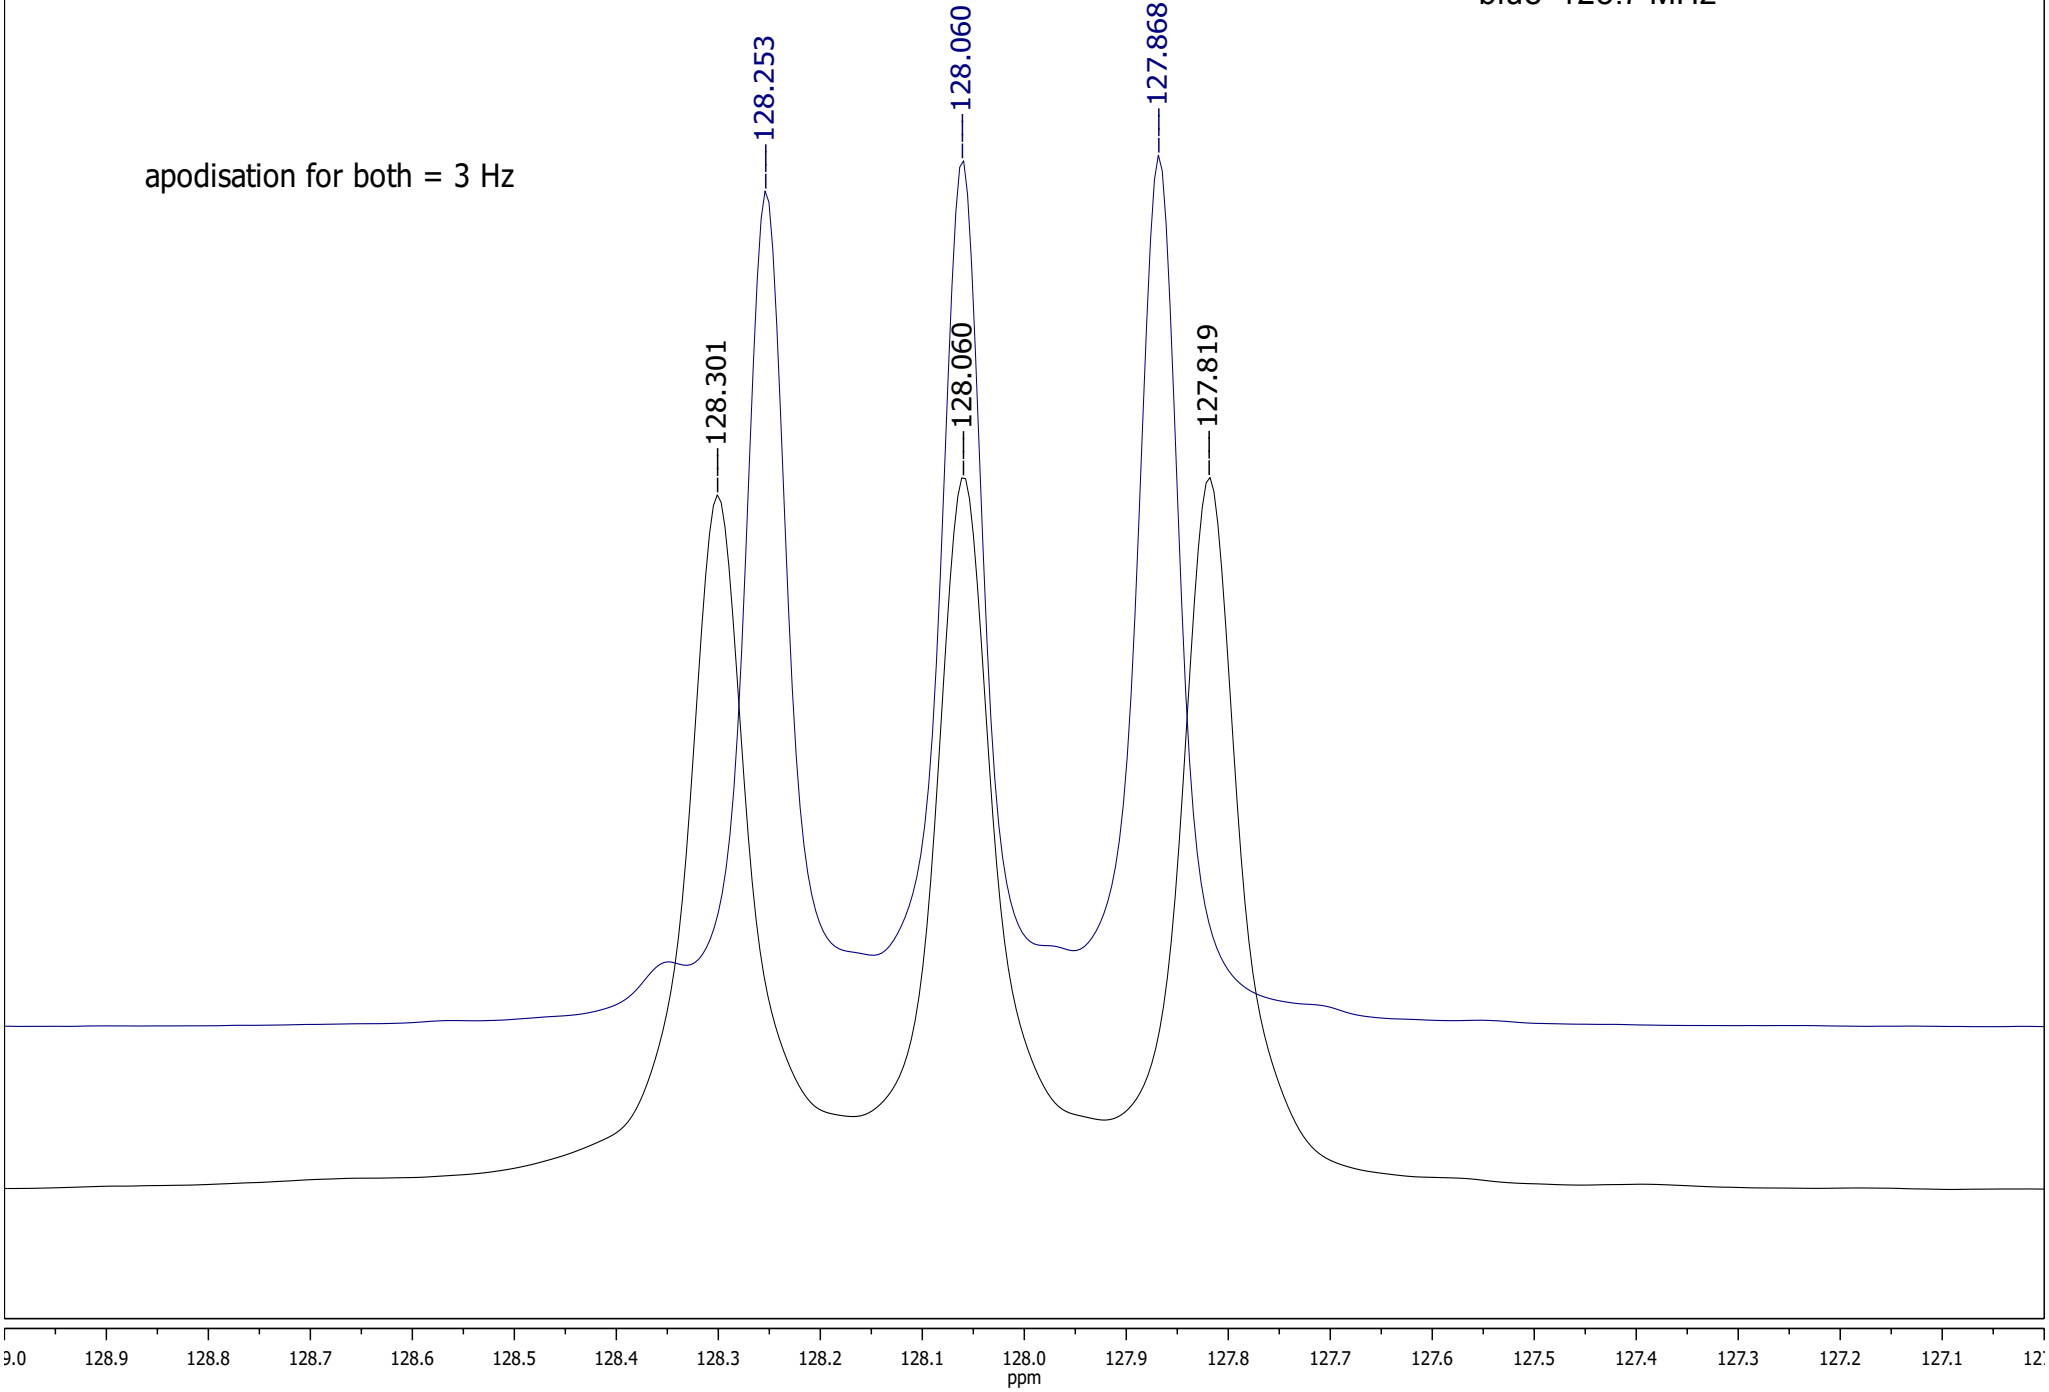

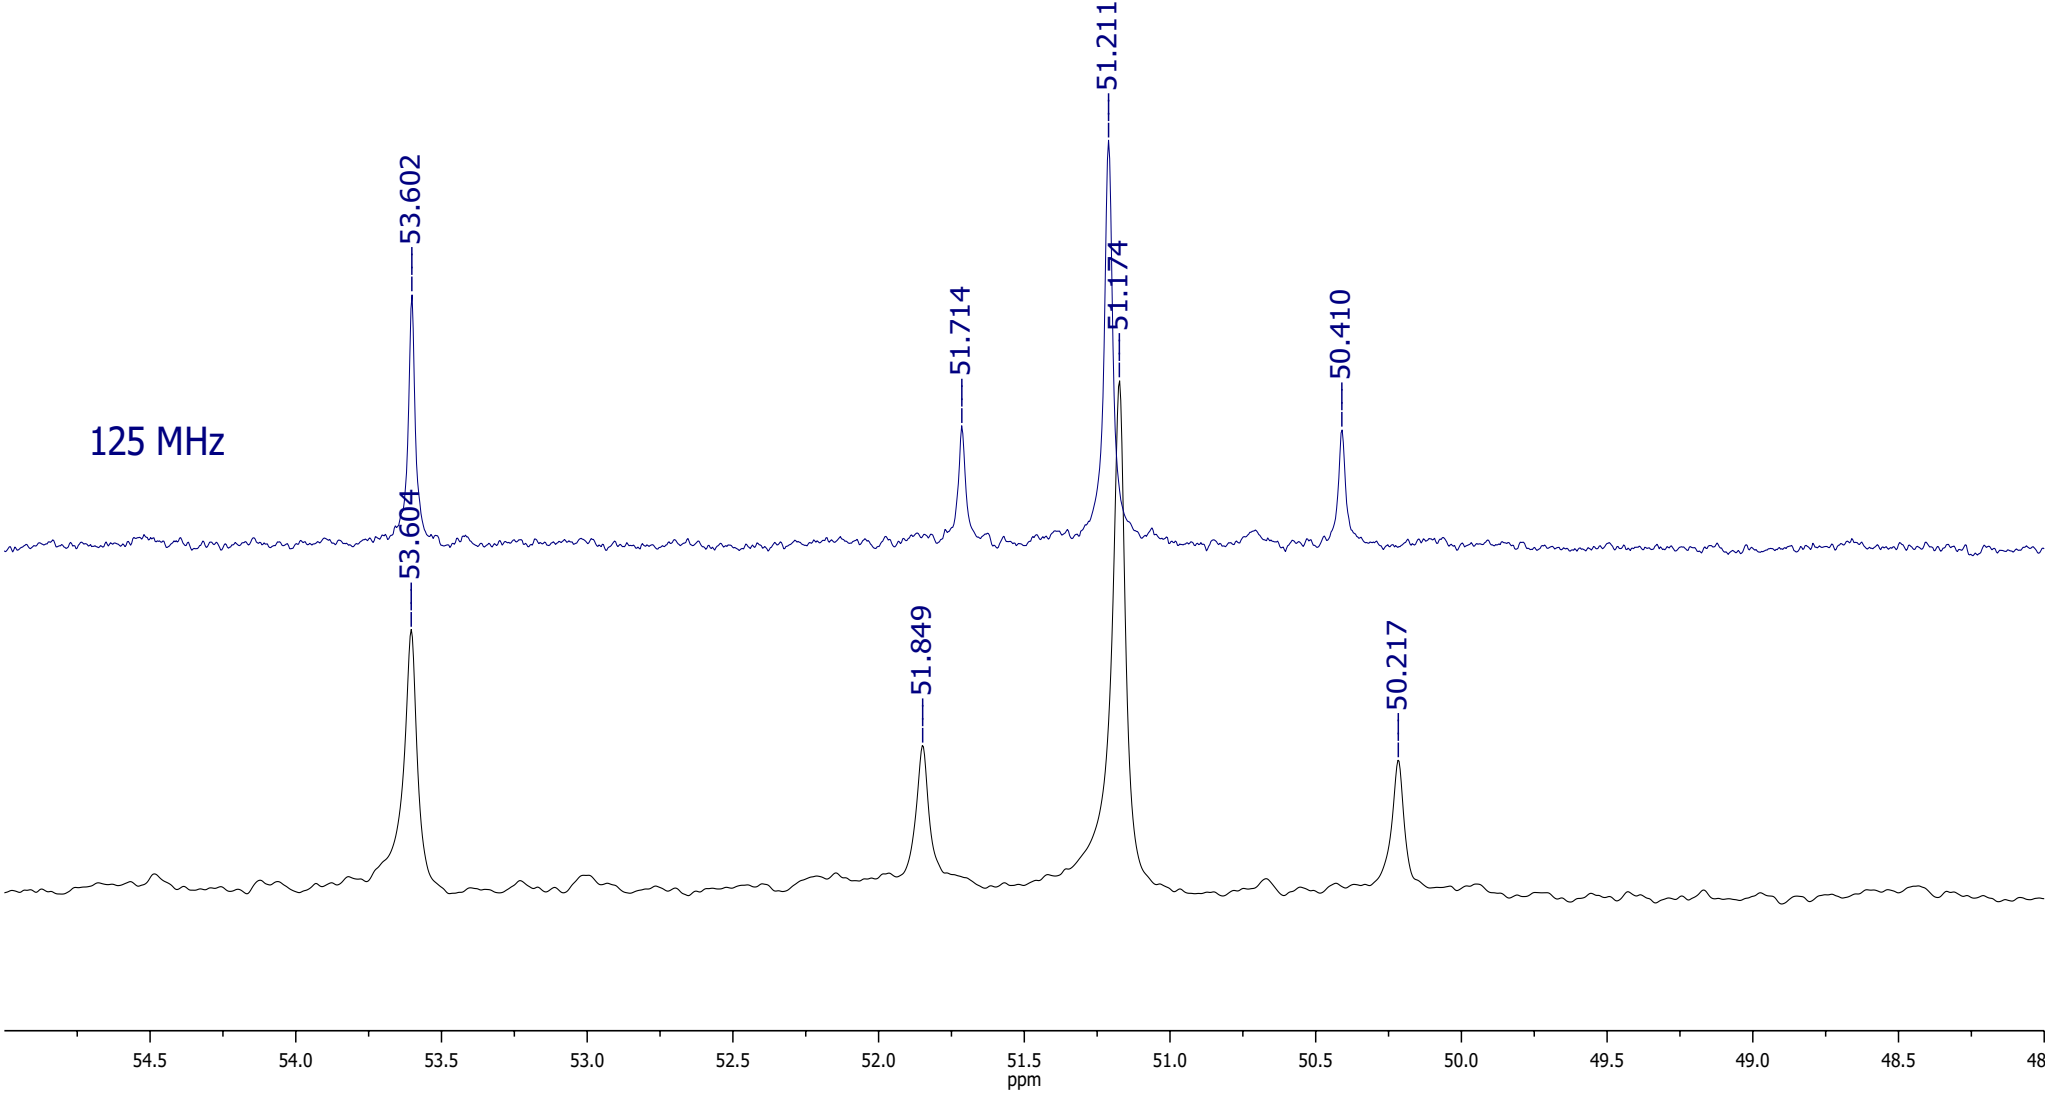

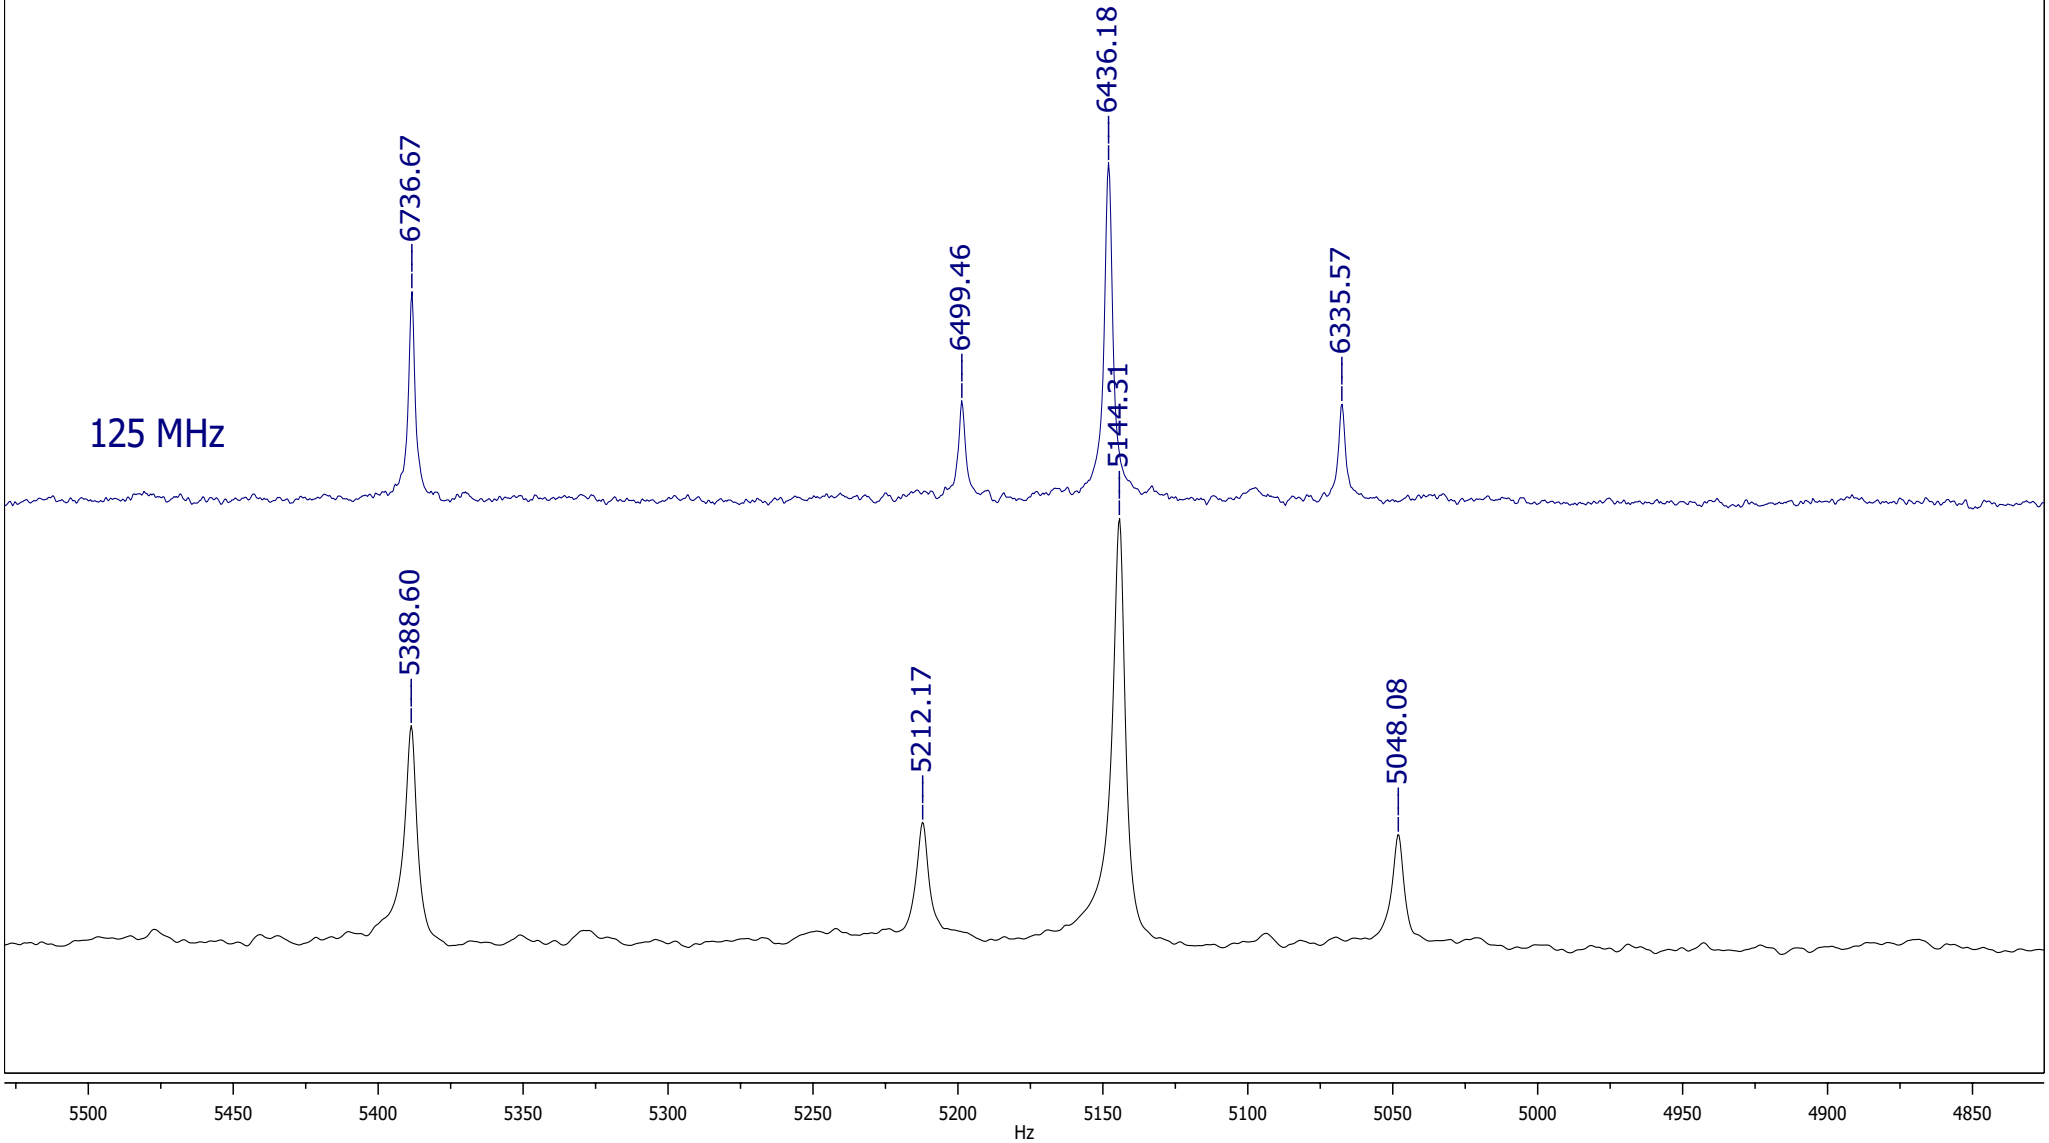

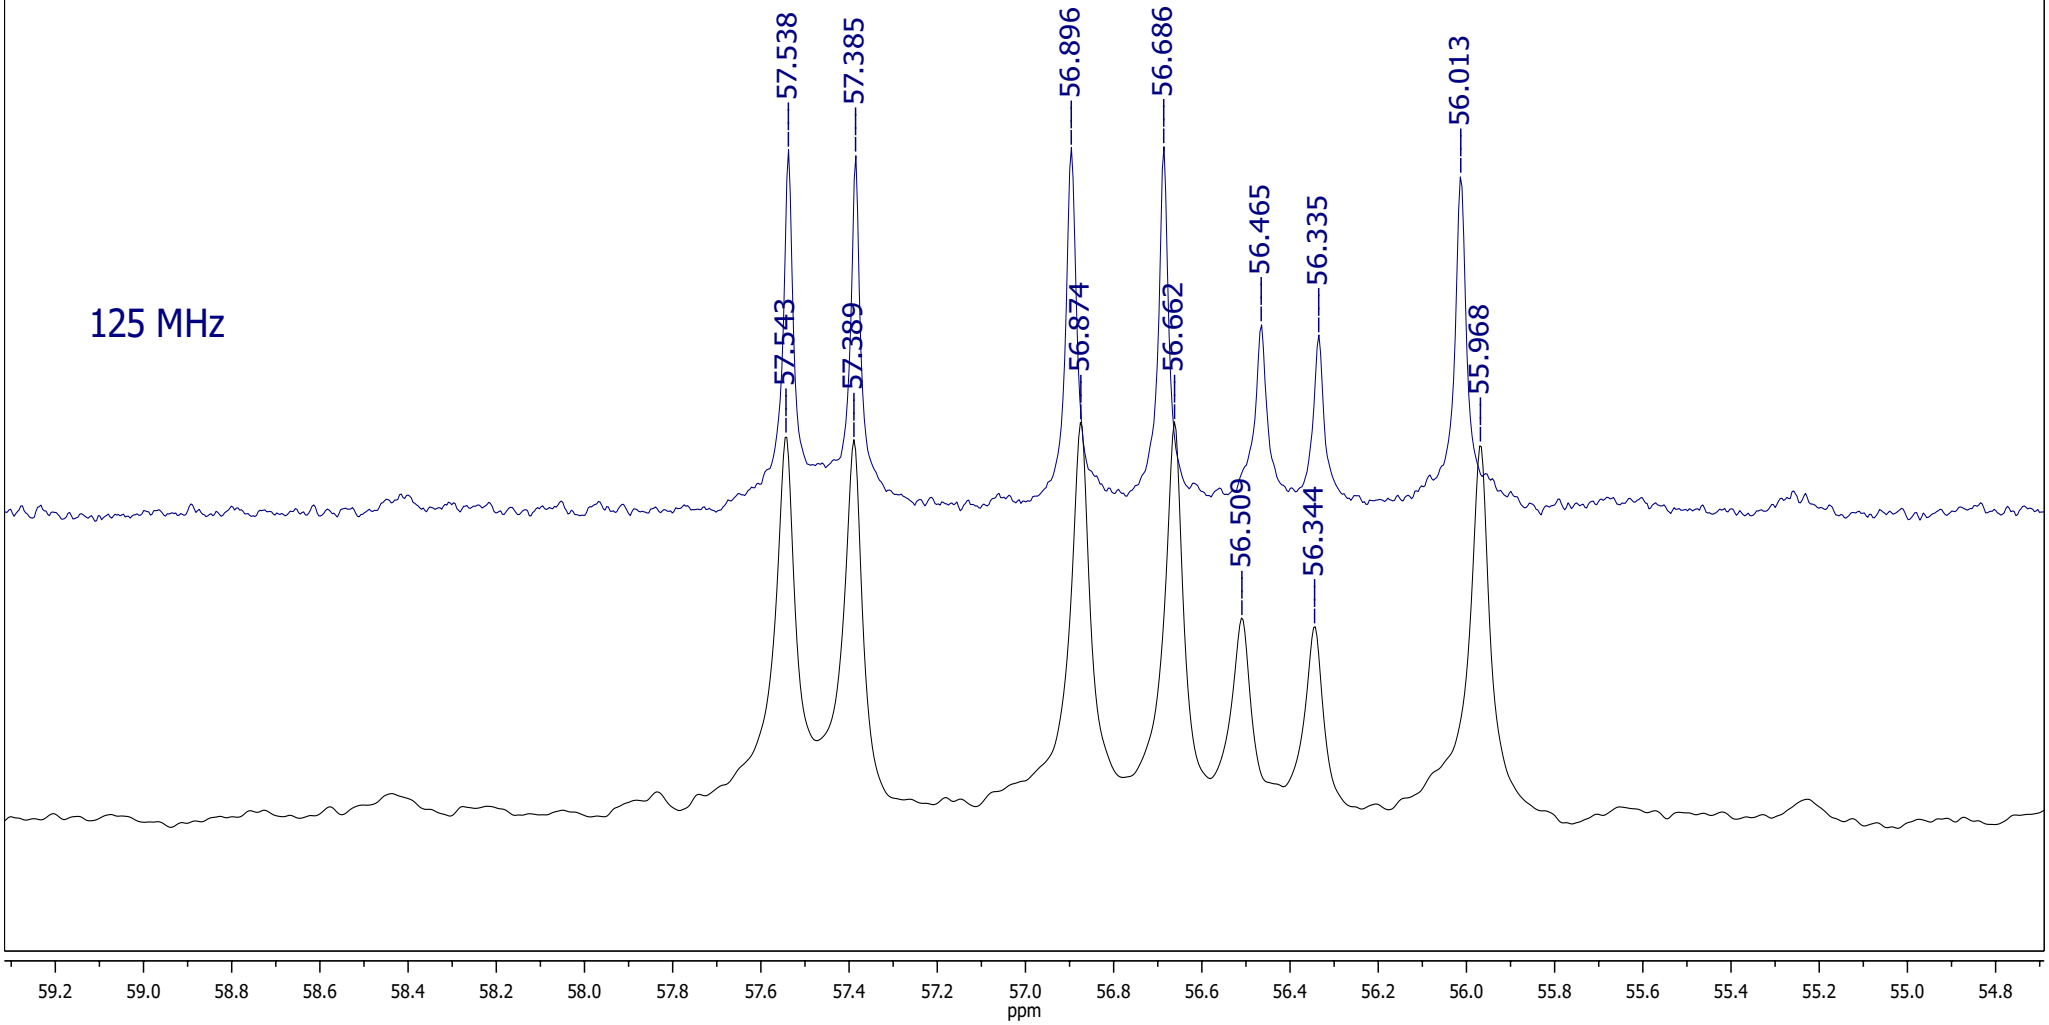

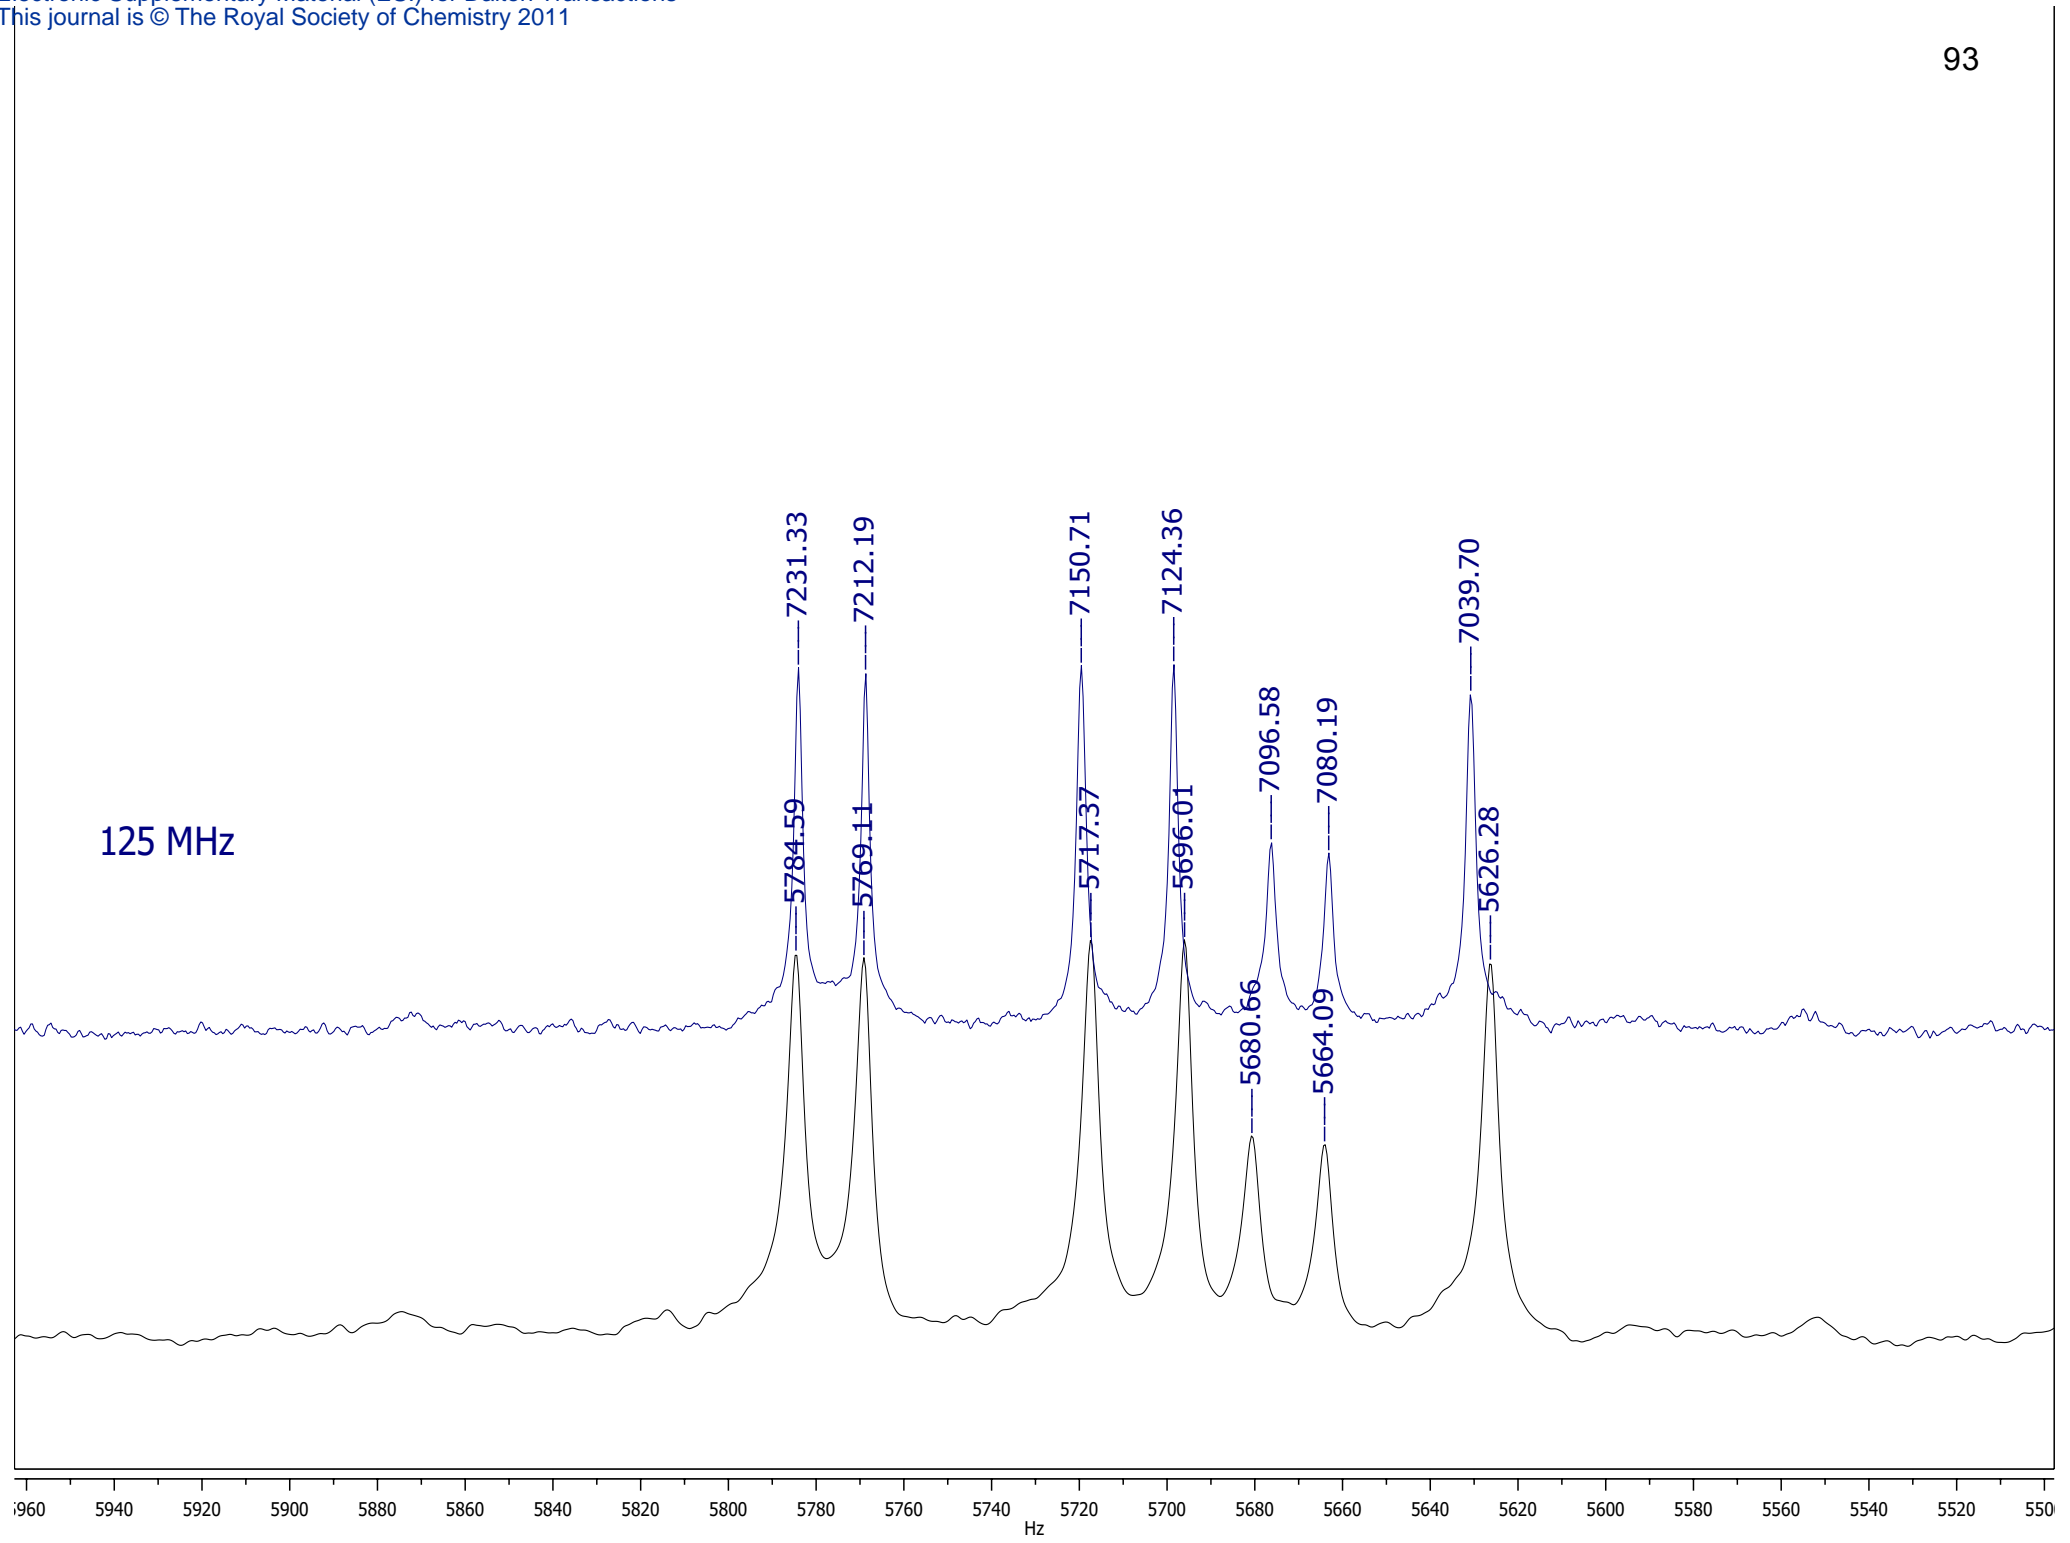

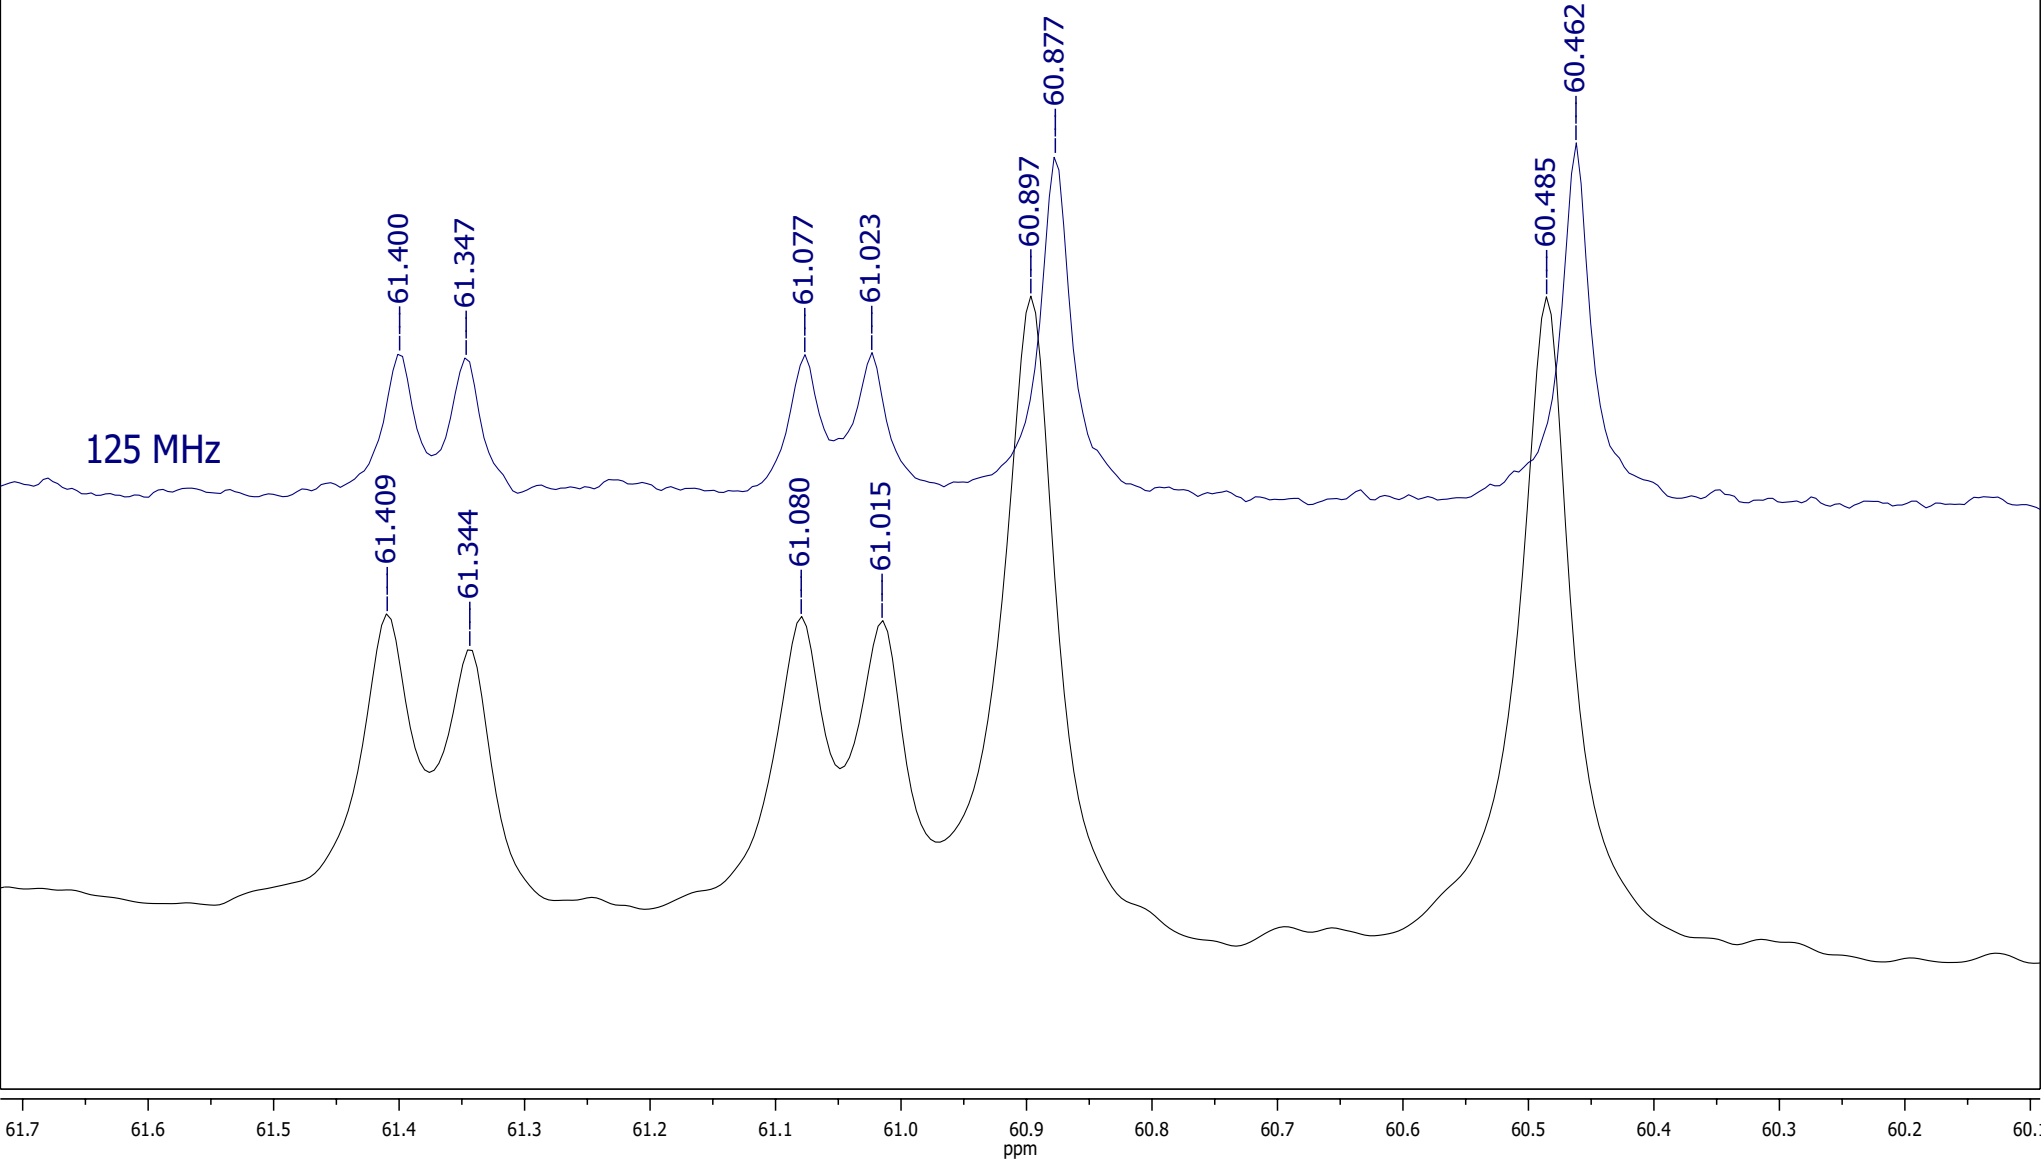

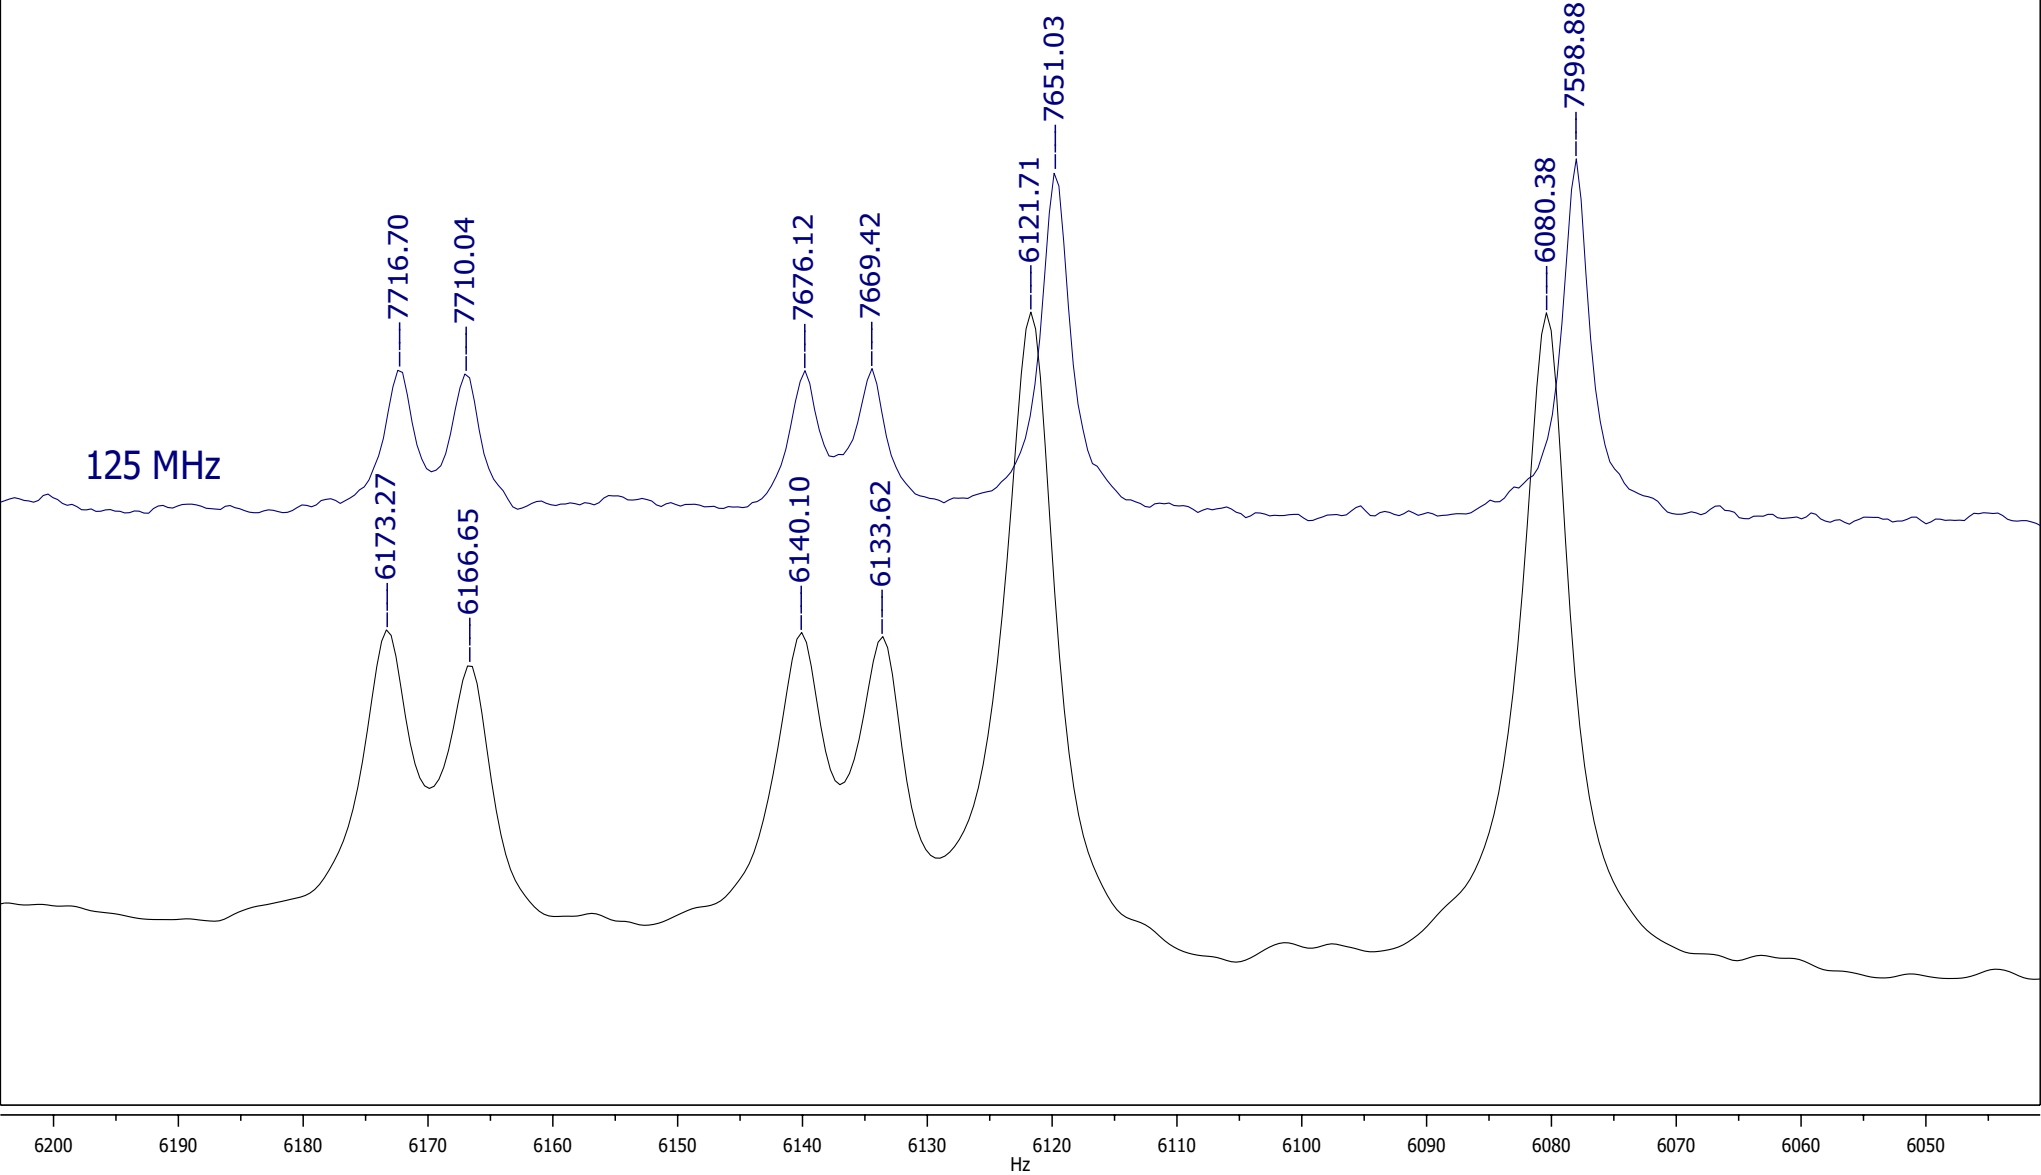

|    |                        |                                                  |
|----|------------------------|--------------------------------------------------|
| 1  | Data File Name         | RF-CB-TE1A1P_protected_PhMe extracts_C6D6-PROTON |
| 2  | Origin                 | Varian                                           |
| 3  | Solvent                | C6D6                                             |
| 4  | Number of Scans        | 16                                               |
| 5  | Receiver Gain          | 24                                               |
| 6  | Acquisition Time       | 3.0000                                           |
| 7  | Acquisition Date       | 2011-02-18T16:17:15                              |
| 8  | Spectrometer Frequency | 499.77585                                        |
| 9  | Spectral Width         | 7992.0                                           |
| 10 | Lowest Frequency       | -1496.1                                          |
| 11 | Nucleus                | $^1\text{H}$                                     |
| 12 | Acquired Size          | 23976                                            |
| 13 | Spectral Size          | 65536                                            |

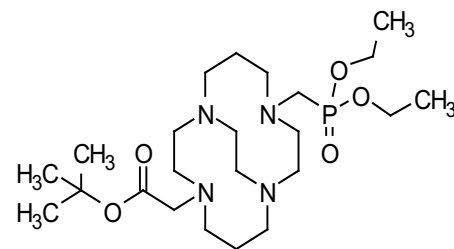

$\text{C}_6\text{D}_6$ , 499.78 MHz, internal reference set to  
TMS at  $\delta$  0.00

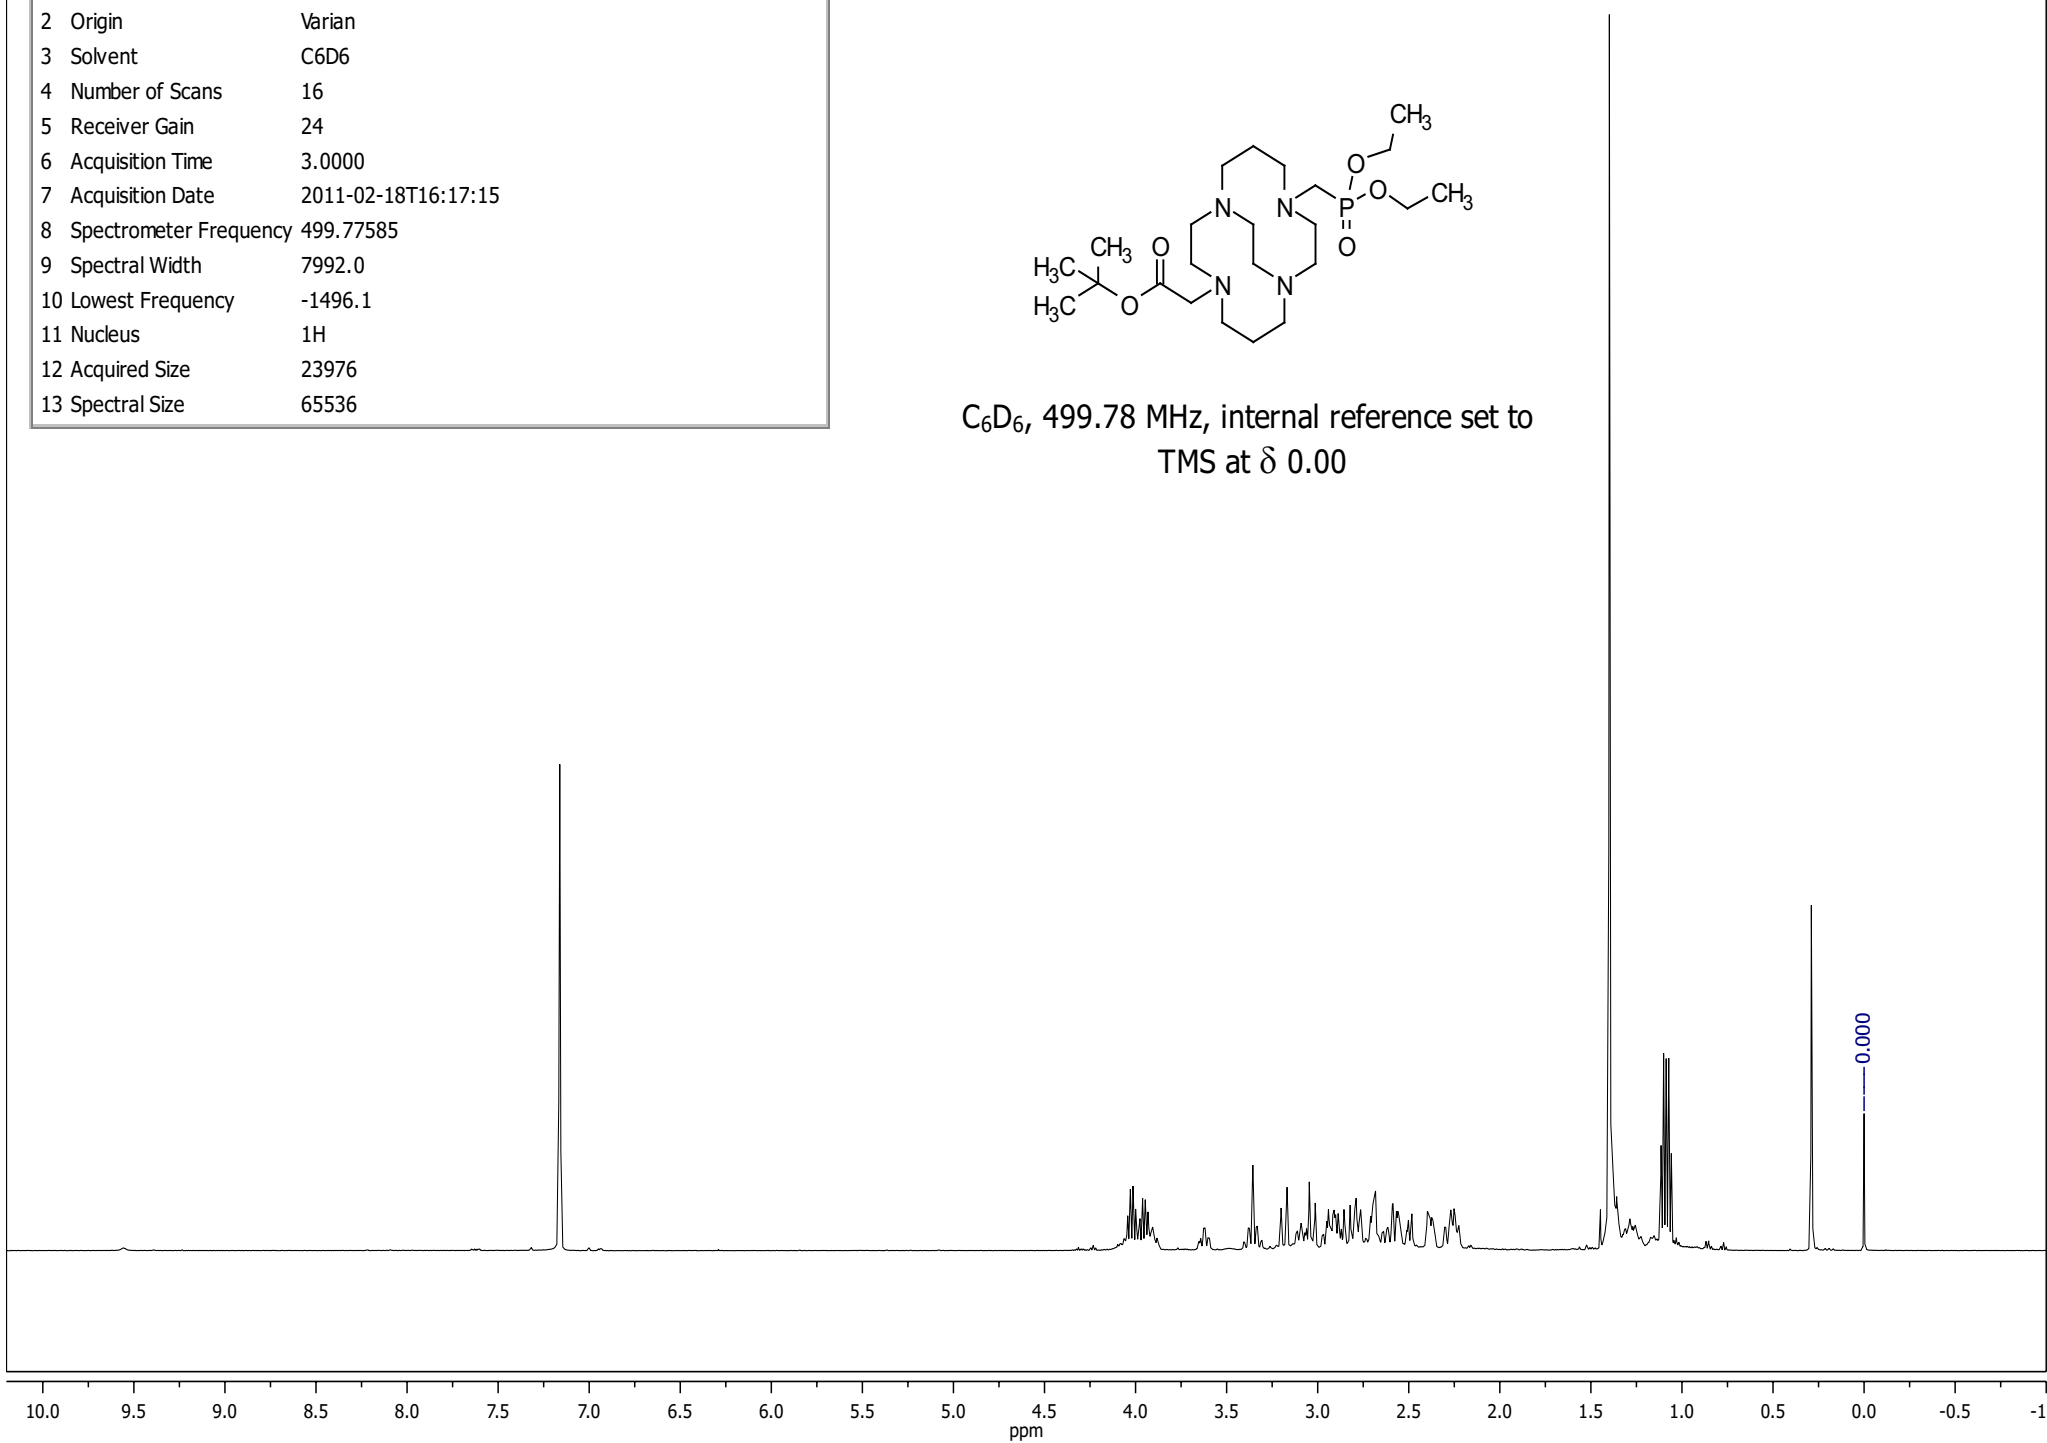

|    |                        |                                          |
|----|------------------------|------------------------------------------|
| 1  | Data File Name         | RF-CB-TE1A1P_protected_PhMe extracts_13C |
| 2  | Origin                 | Varian                                   |
| 3  | Solvent                | C6D6                                     |
| 4  | Number of Scans        | 5000                                     |
| 5  | Receiver Gain          | 40                                       |
| 6  | Acquisition Time       | 1.0000                                   |
| 7  | Acquisition Date       | 2011-02-17T11:00:46                      |
| 8  | Spectrometer Frequency | 125.68005                                |
| 9  | Spectral Width         | 31446.5                                  |
| 10 | Lowest Frequency       | -3735.5                                  |
| 11 | Nucleus                | 13C                                      |
| 12 | Acquired Size          | 31447                                    |
| 13 | Spectral Size          | 65536                                    |

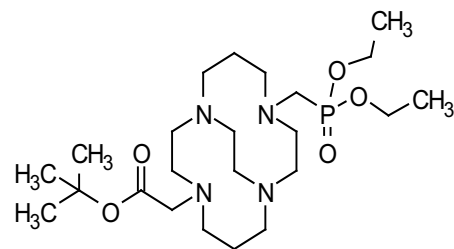

C<sub>6</sub>D<sub>6</sub>, 125.68 MHz, internal reference  
set to TMS at  $\delta$  0.00

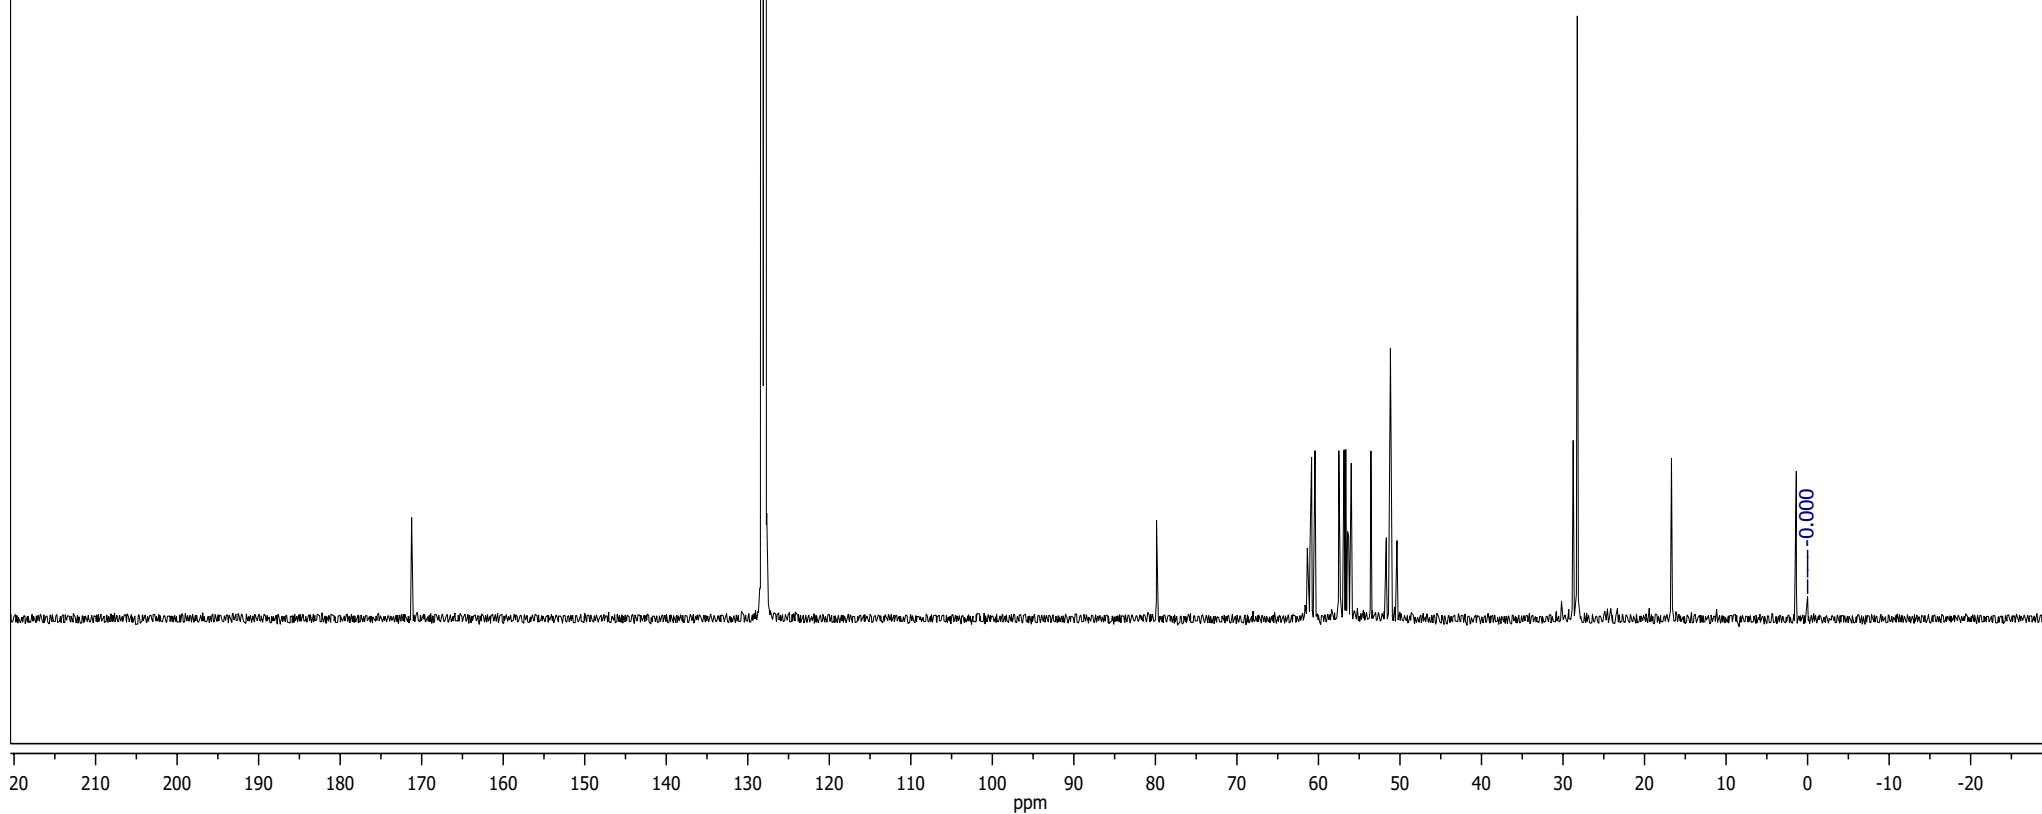

| Parameters             |                                                |
|------------------------|------------------------------------------------|
| Parameter              | Value (f2, f1)                                 |
| Data File Name         | RF-CB-TE1A1P_protected_PhMe extracts_C6D6-HMQC |
| Origin                 | Varian                                         |
| Solvent                | C6D6                                           |
| Number of Scans        | 32                                             |
| Receiver Gain          | 30                                             |
| Acquisition Time       | 0.1500                                         |
| Acquisition Date       | 2011-02-18T21:45:08                            |
| Spectrometer Frequency | (499.7758484, 125.6775284)                     |
| Spectral Width         | (8000.0, 21361.8)                              |
| Lowest Frequency       | (-1496.6, -1206.5)                             |
| Nucleus                | (1H, 13C)                                      |
| Acquired Size          | (1200, 256)                                    |
| Spectral Size          | (2048, 2048)                                   |

(See previous two pages for corresponding  
1D proton and carbon spectra)

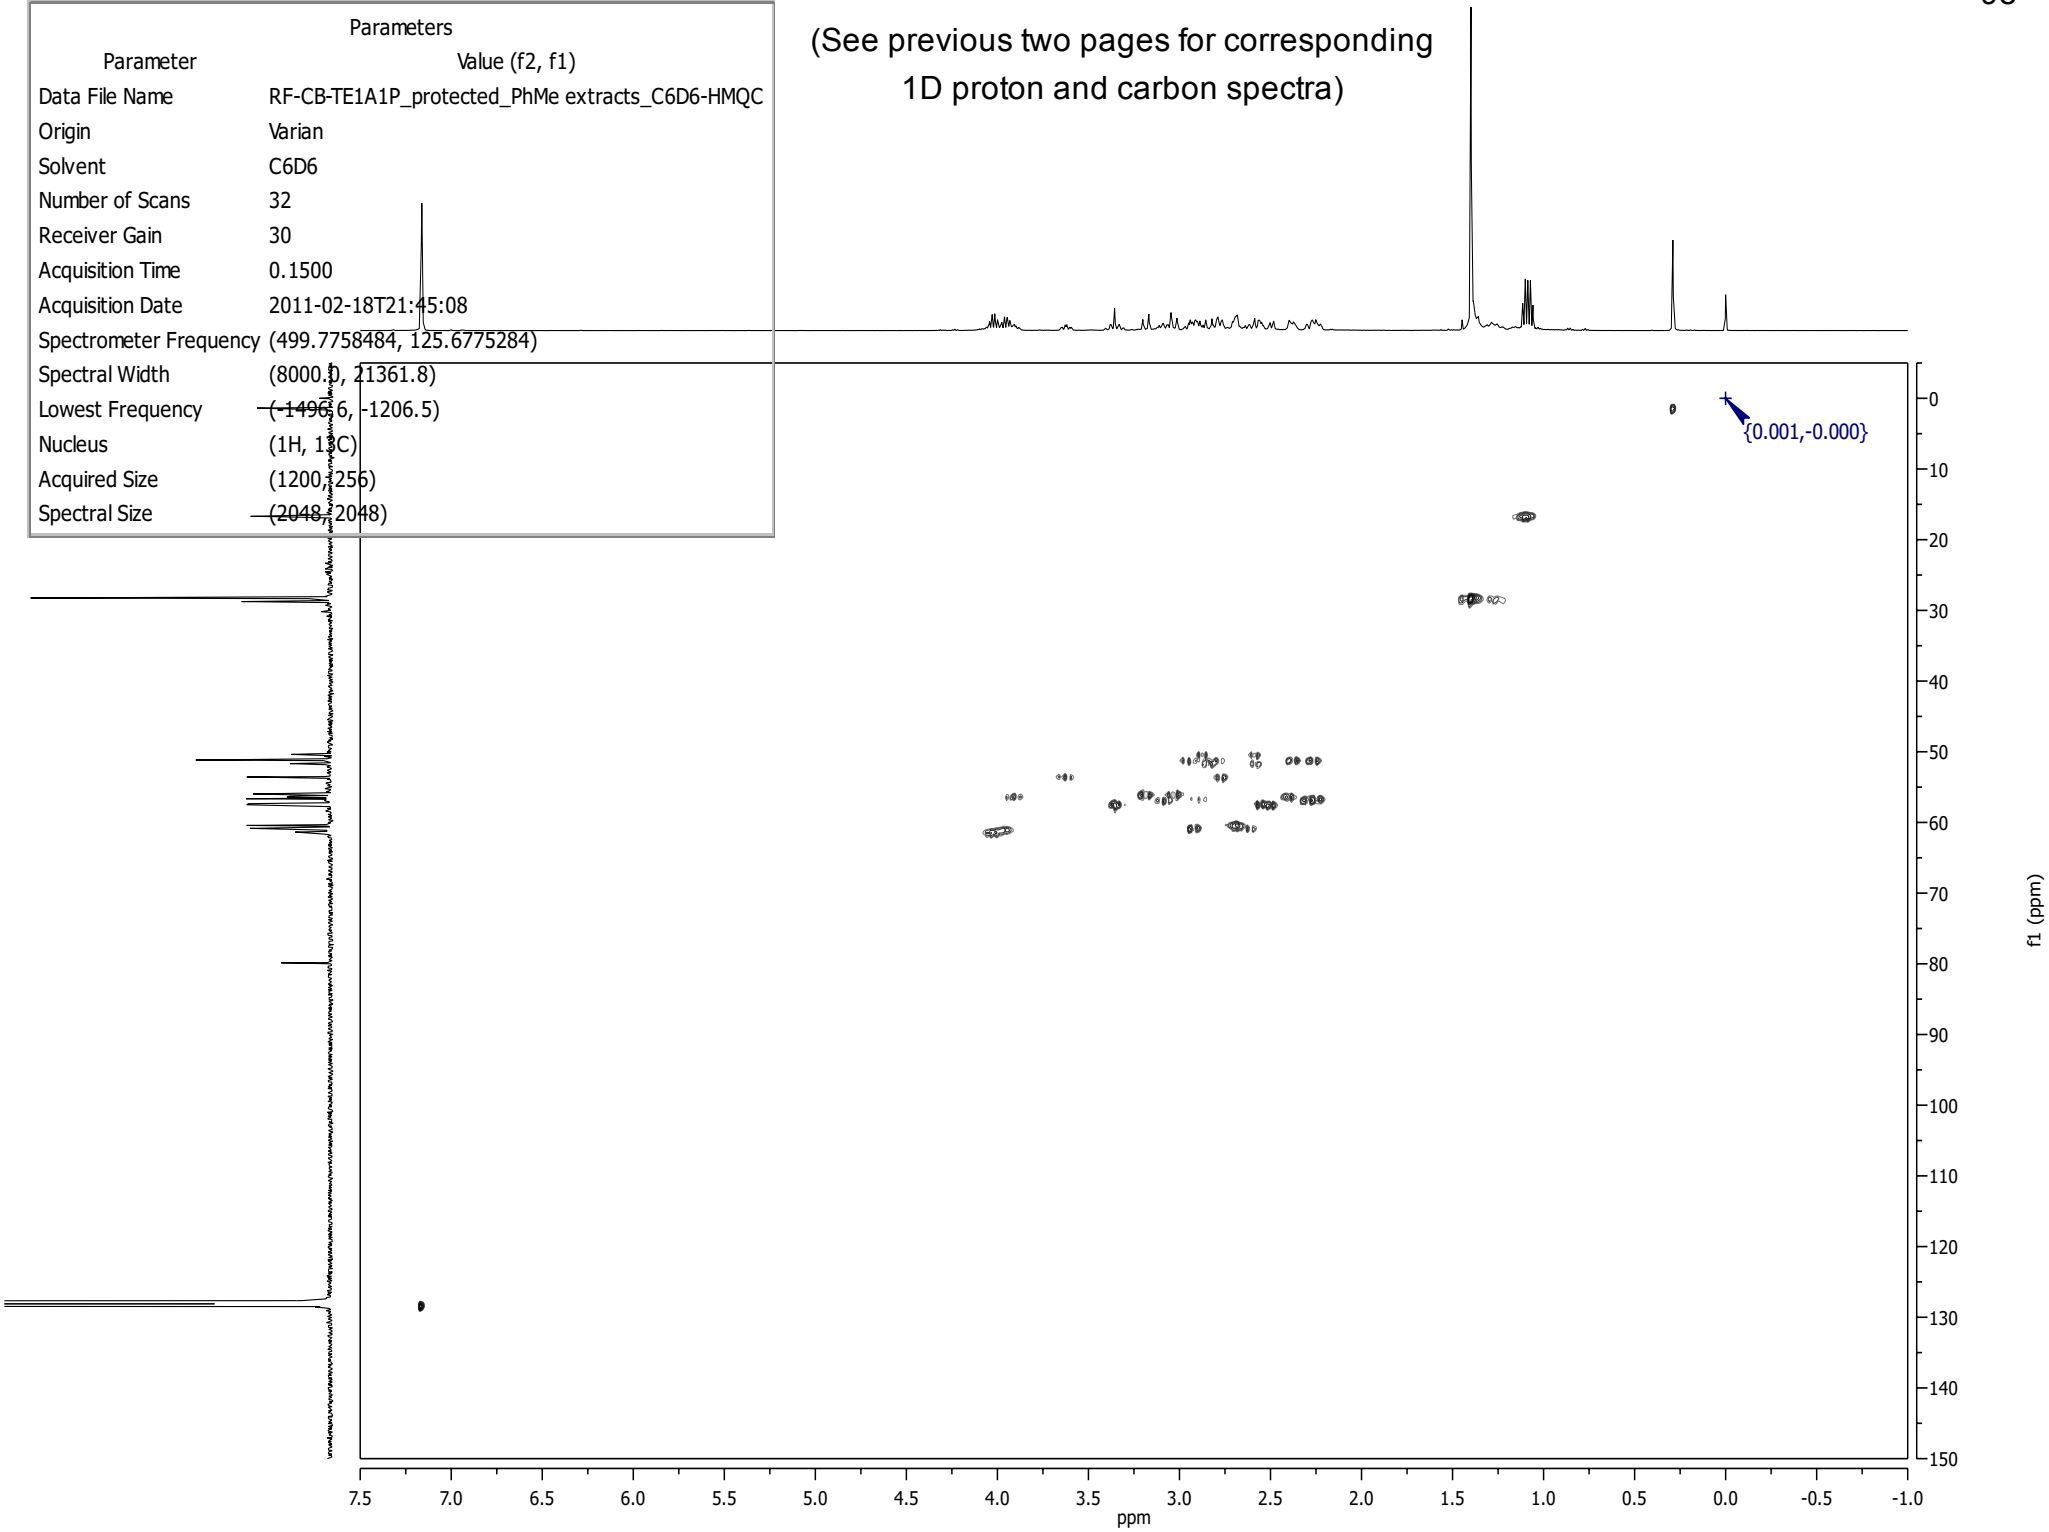

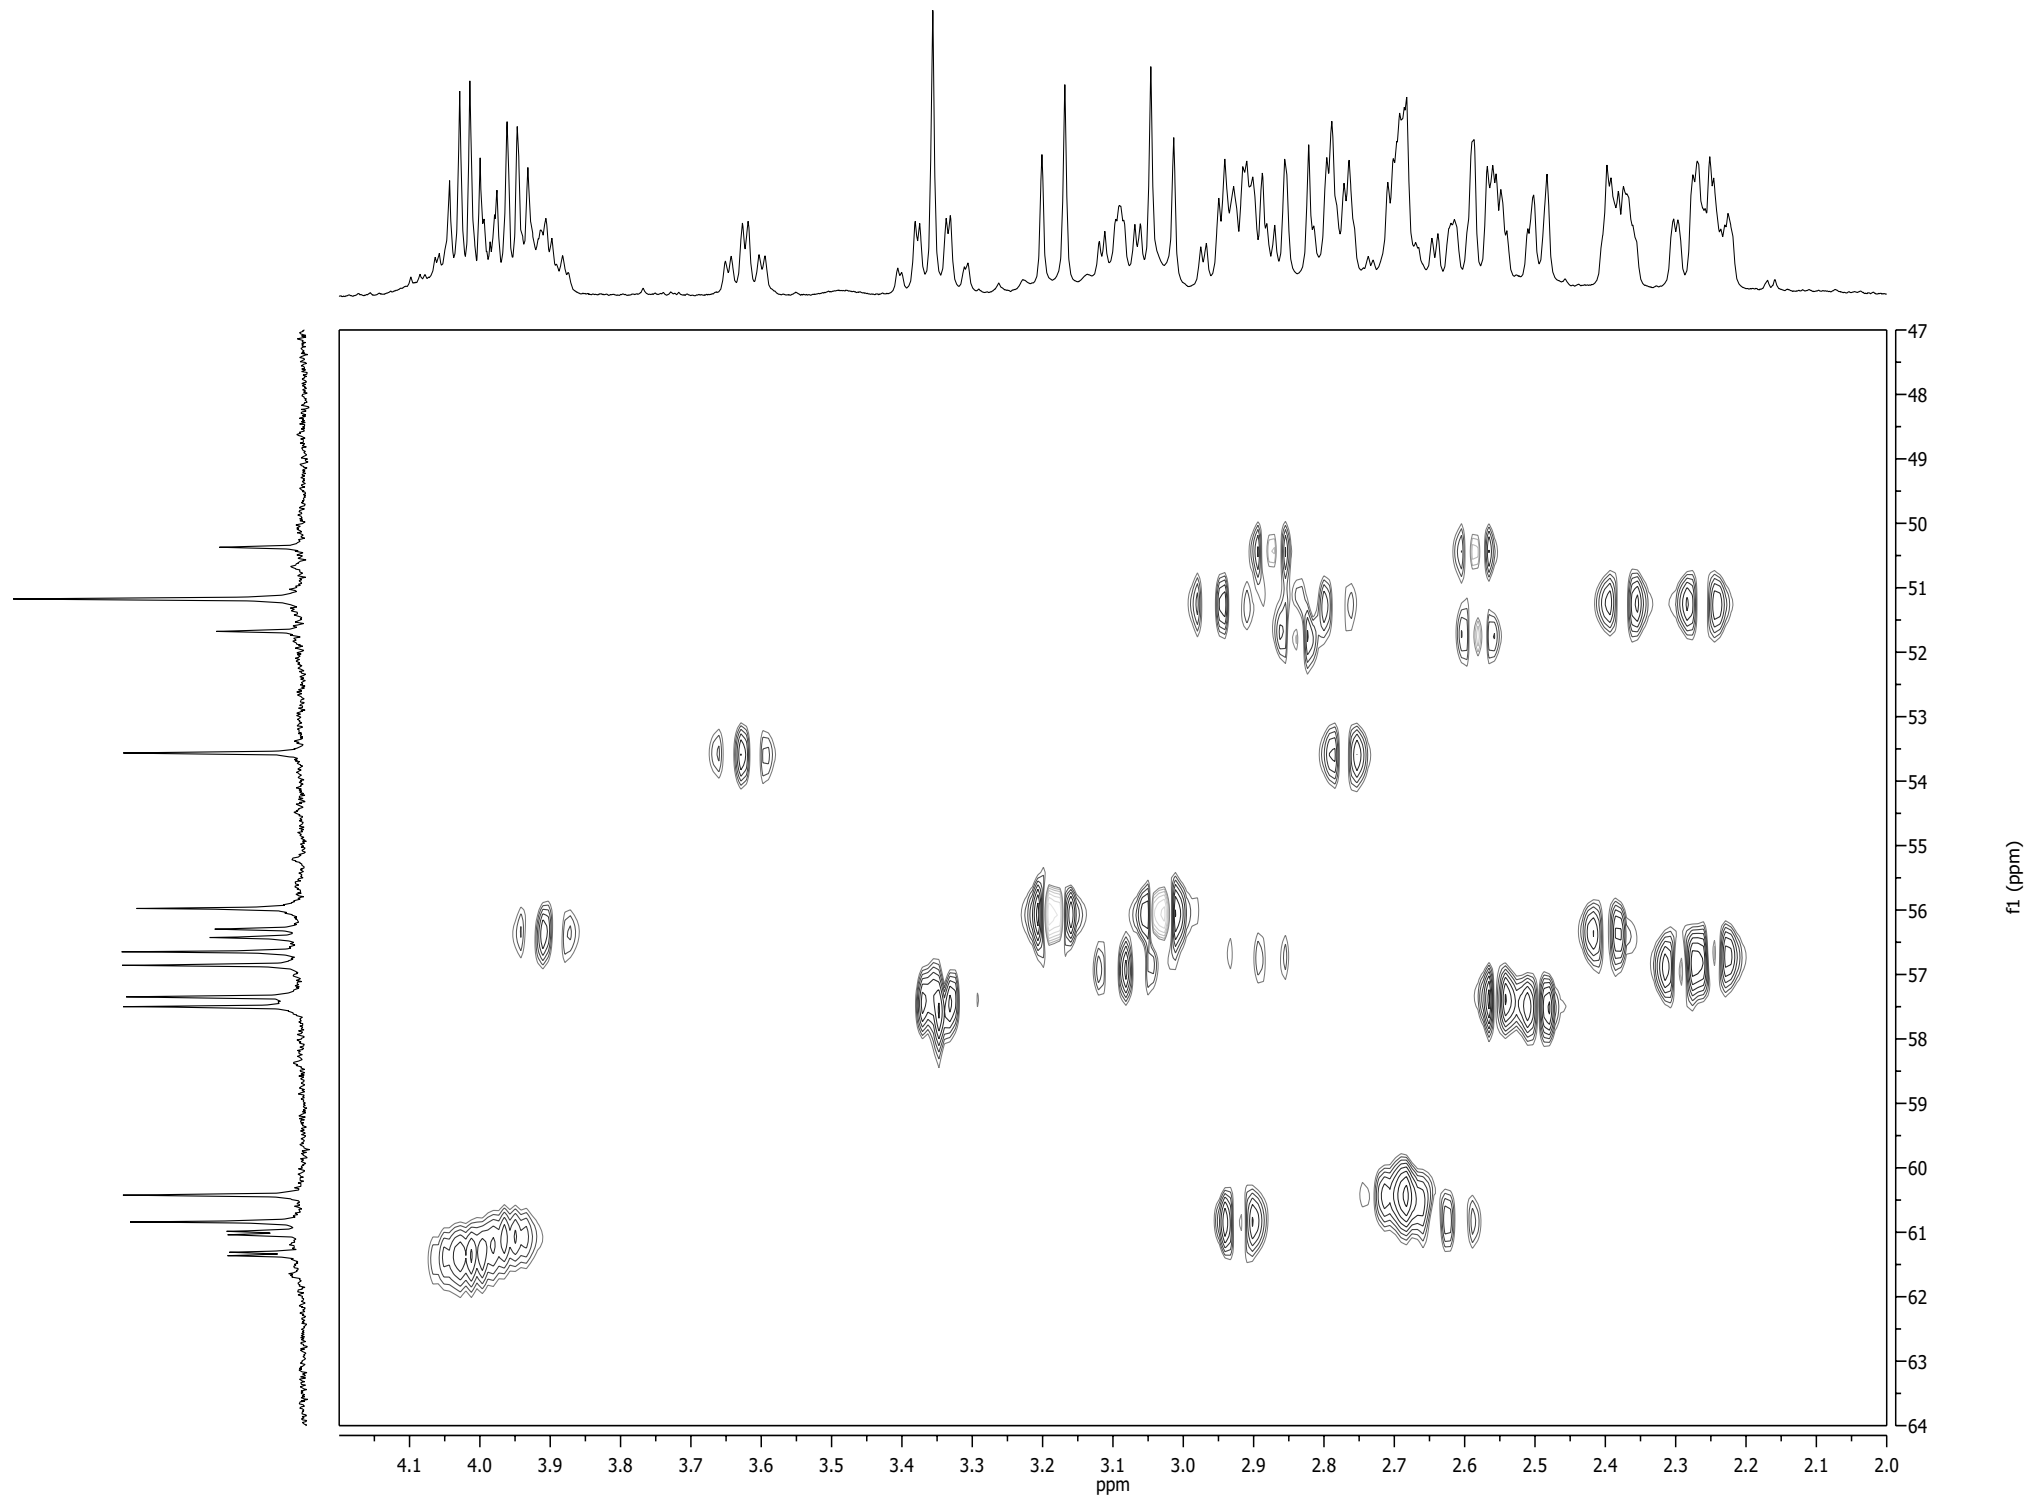

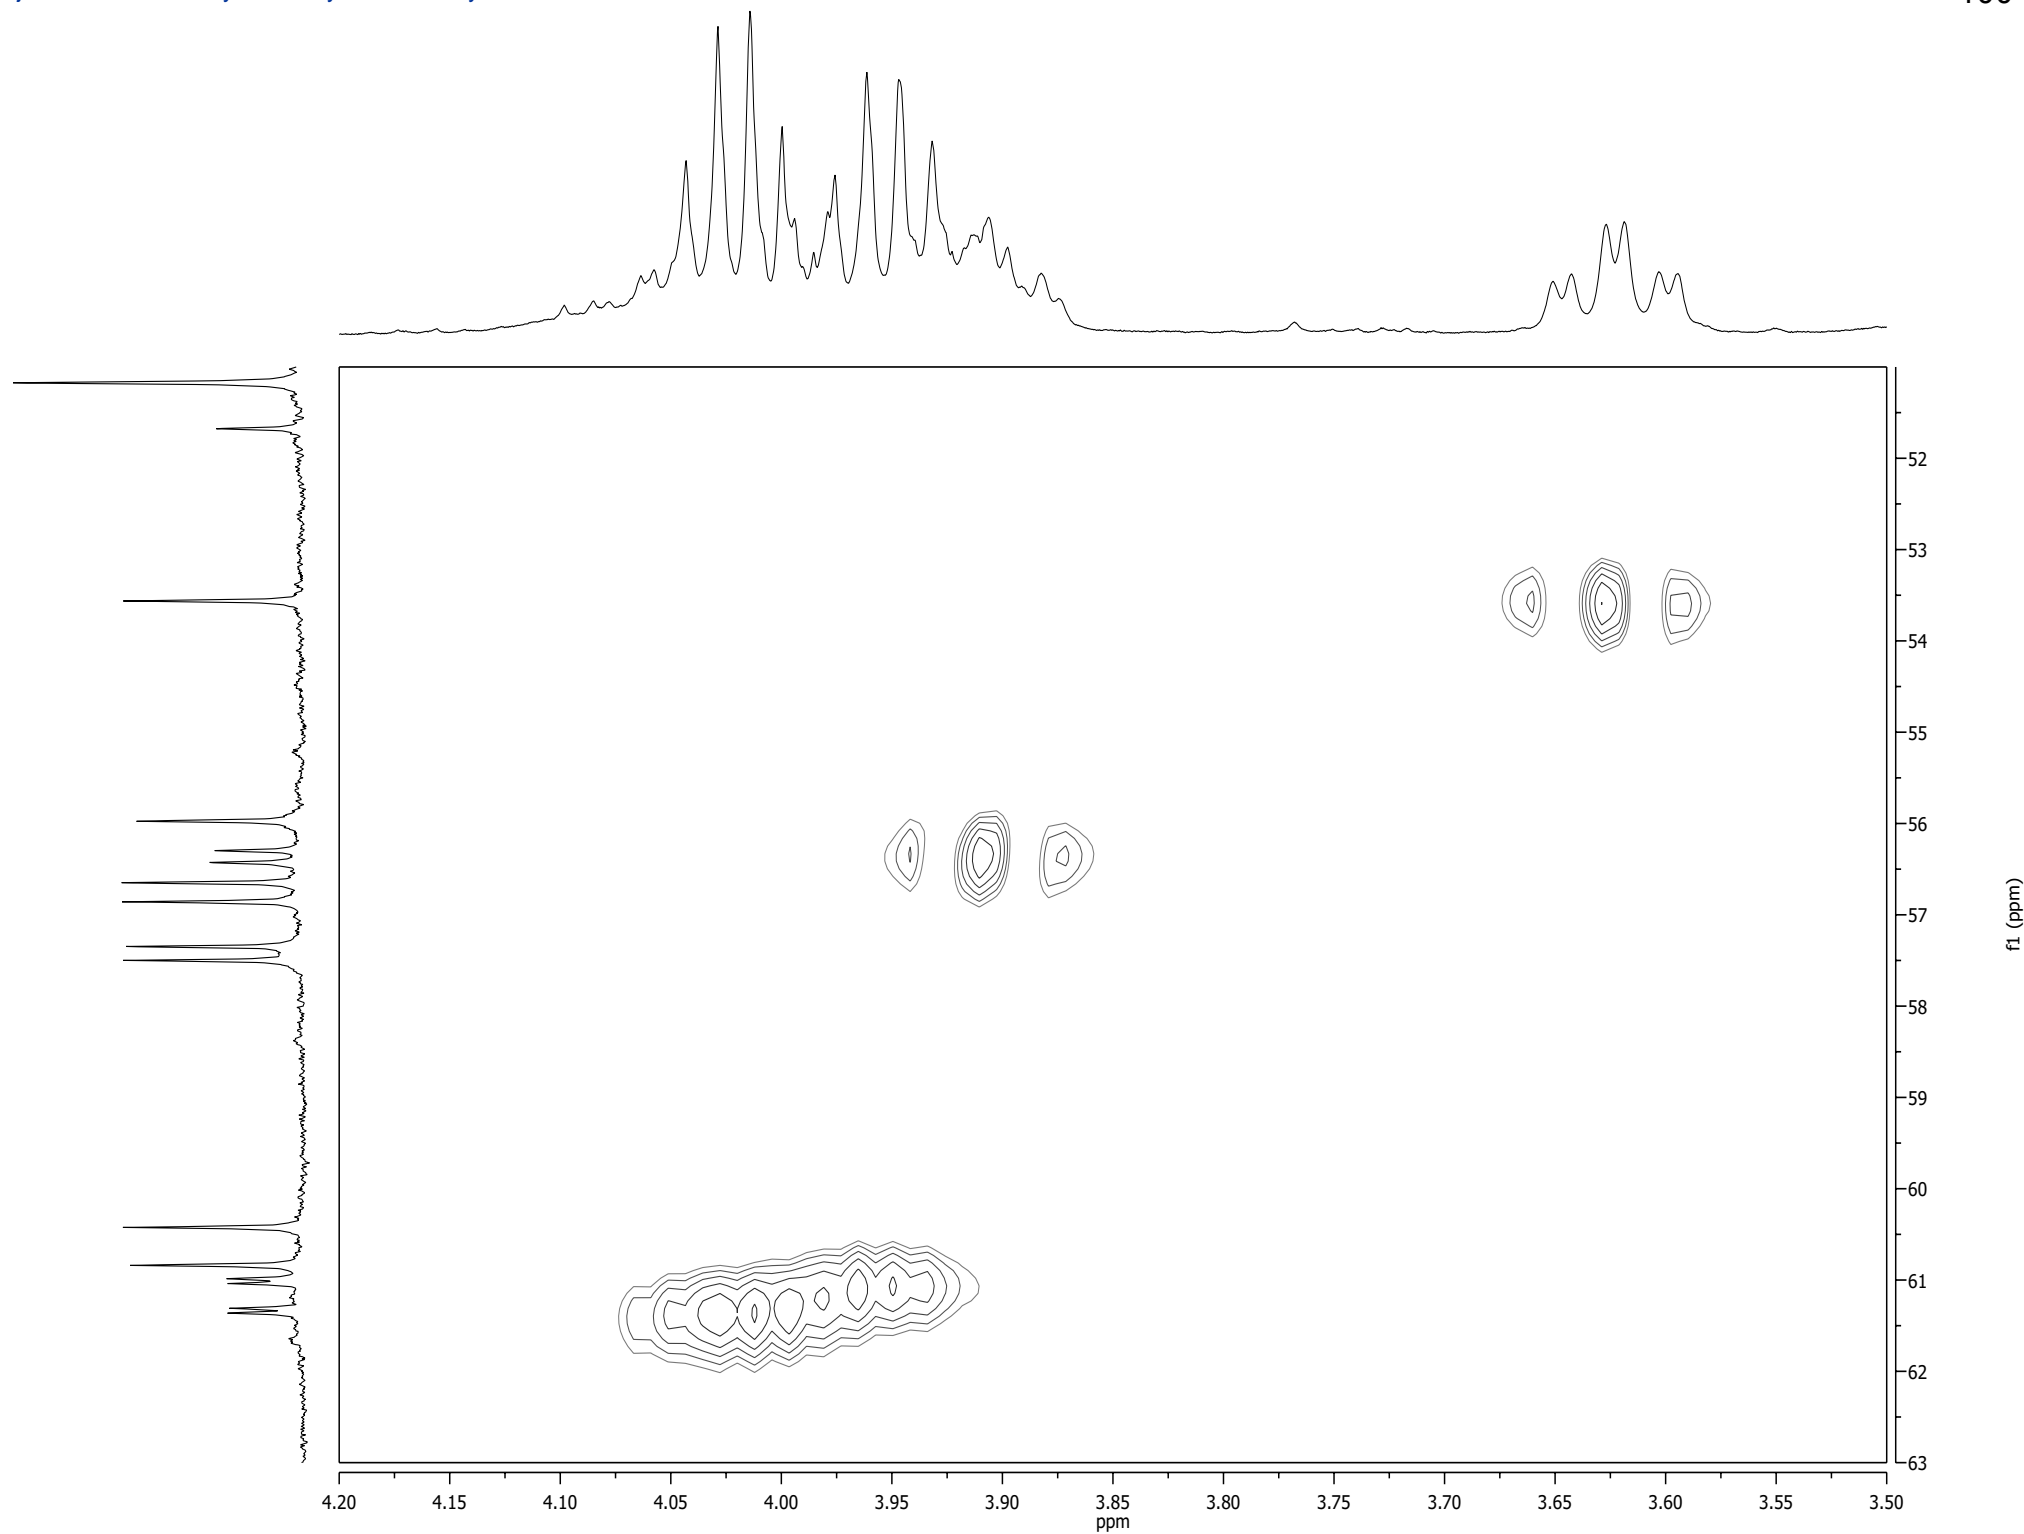

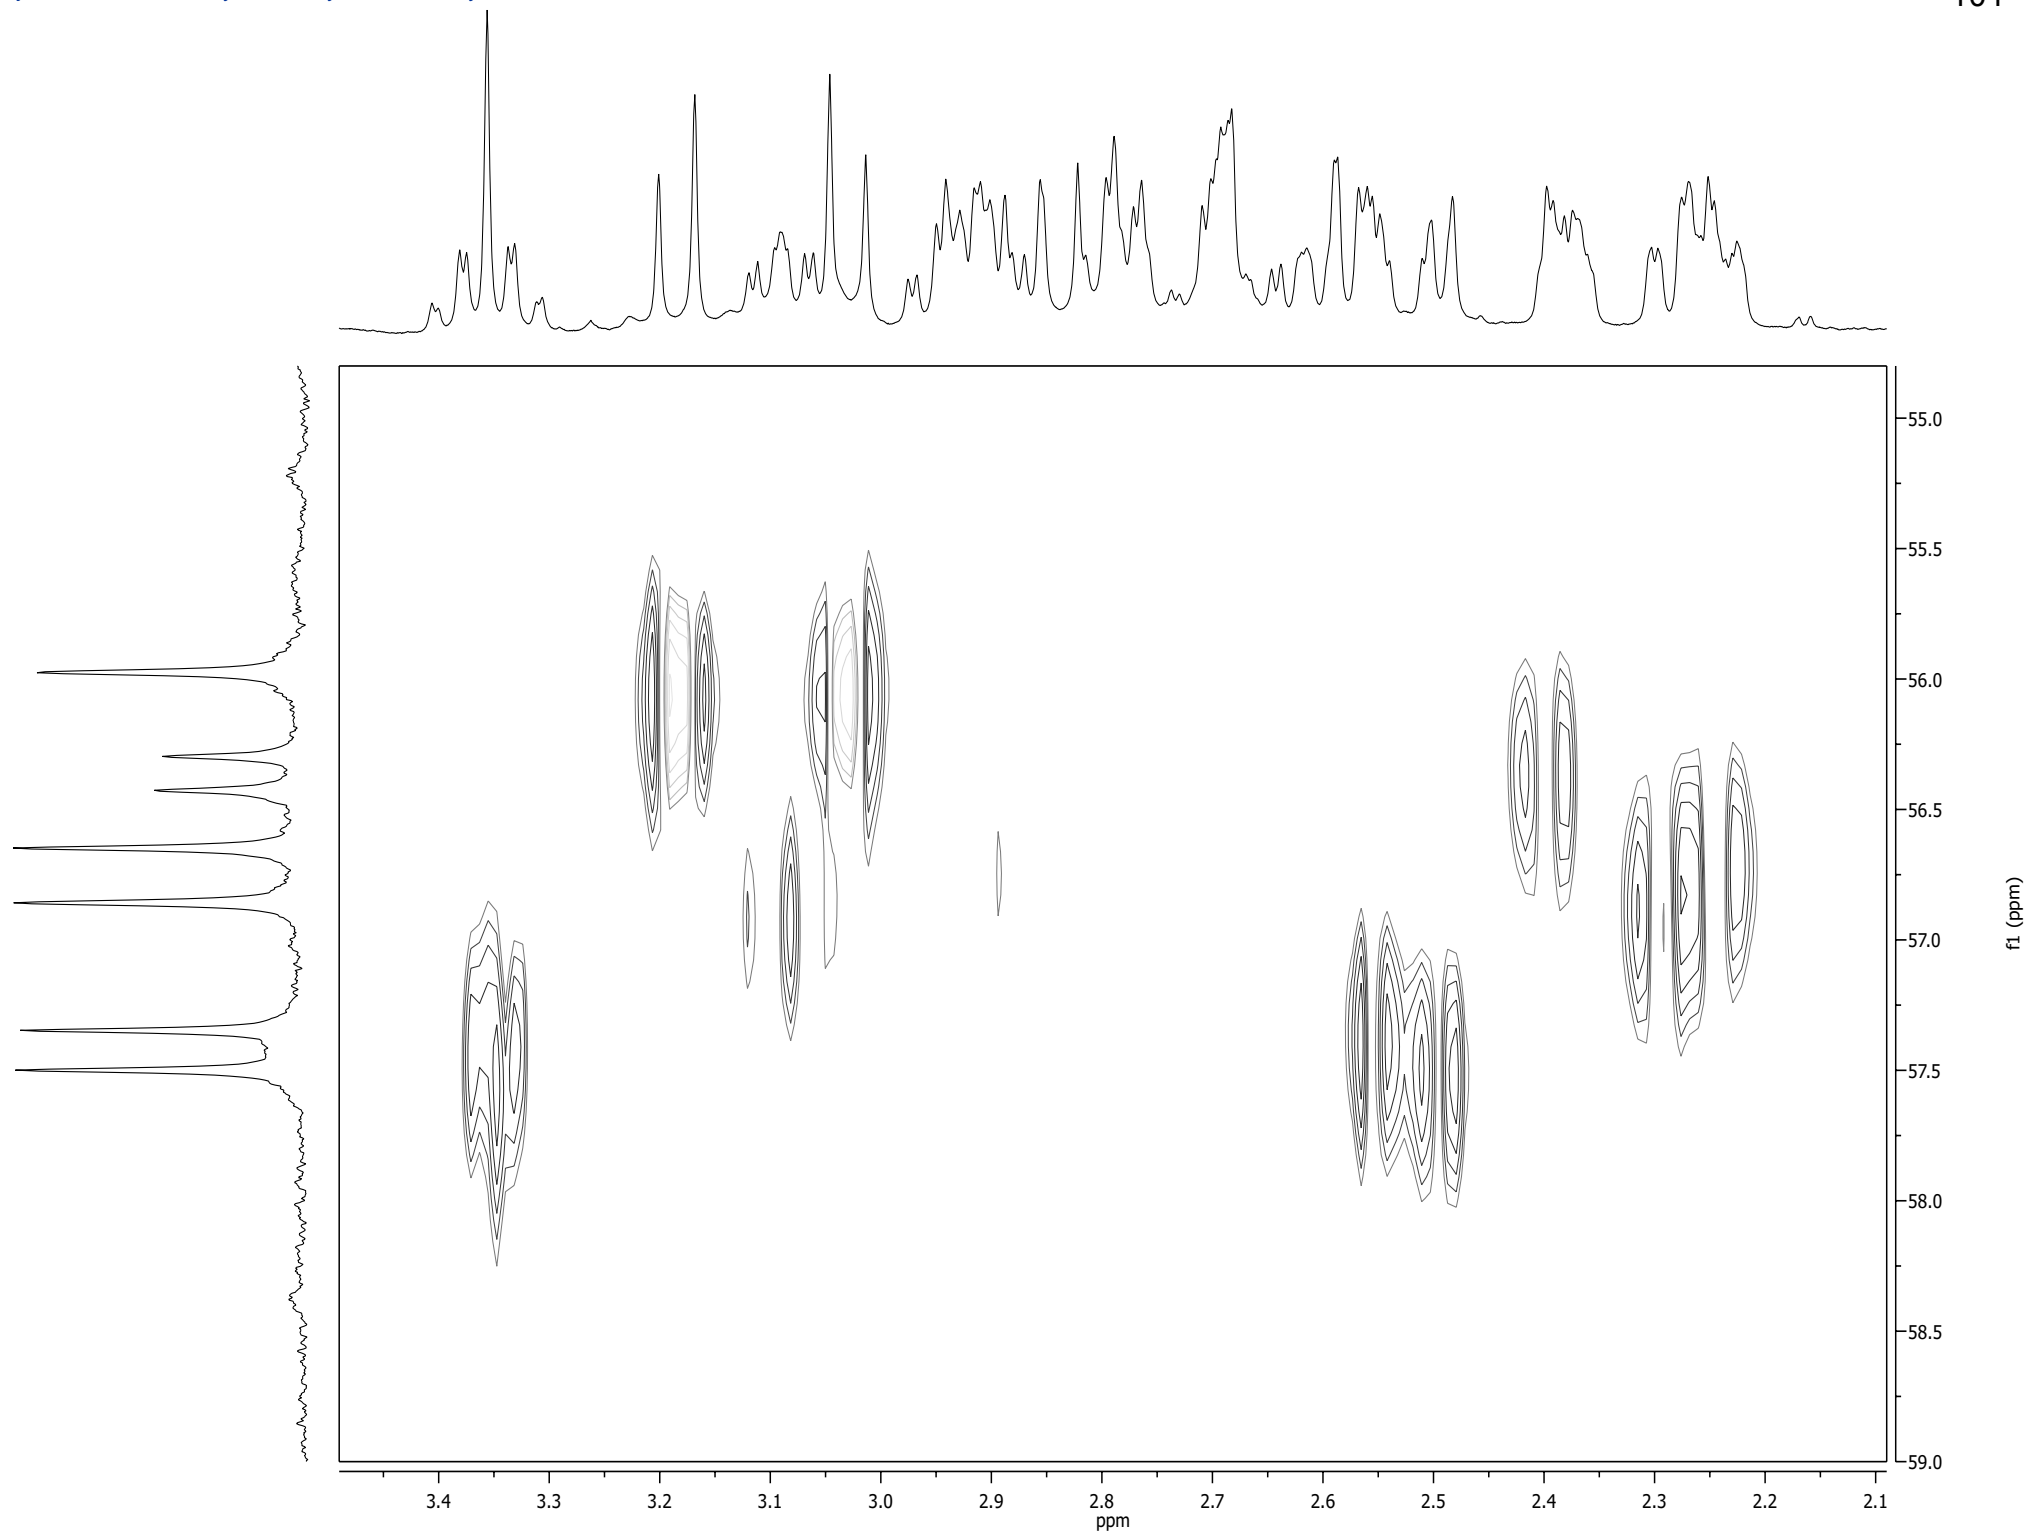

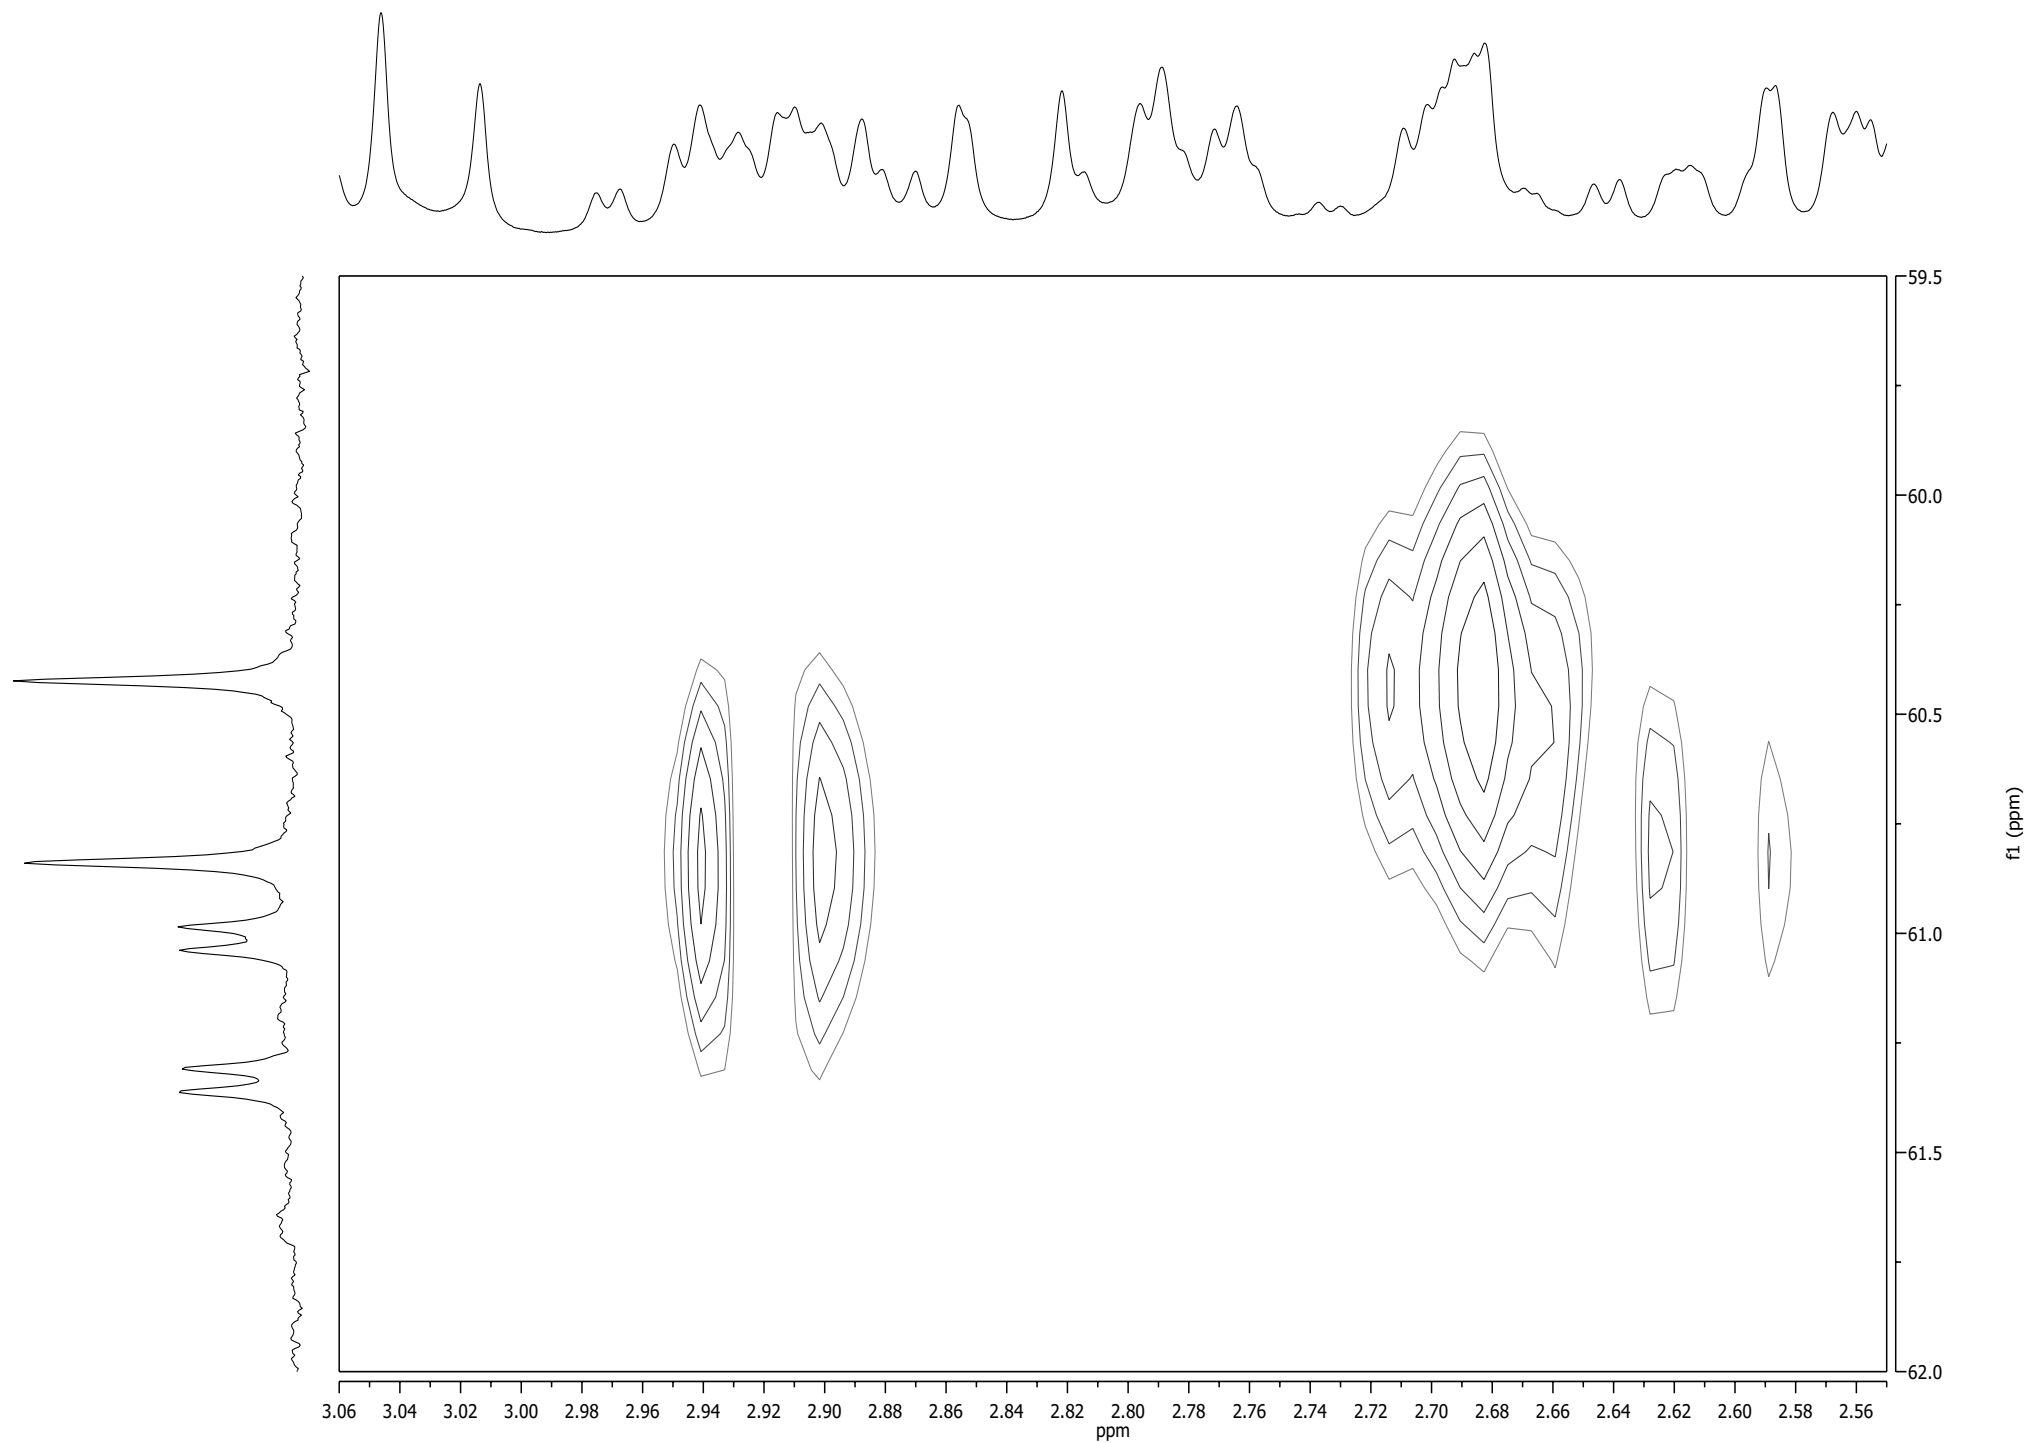

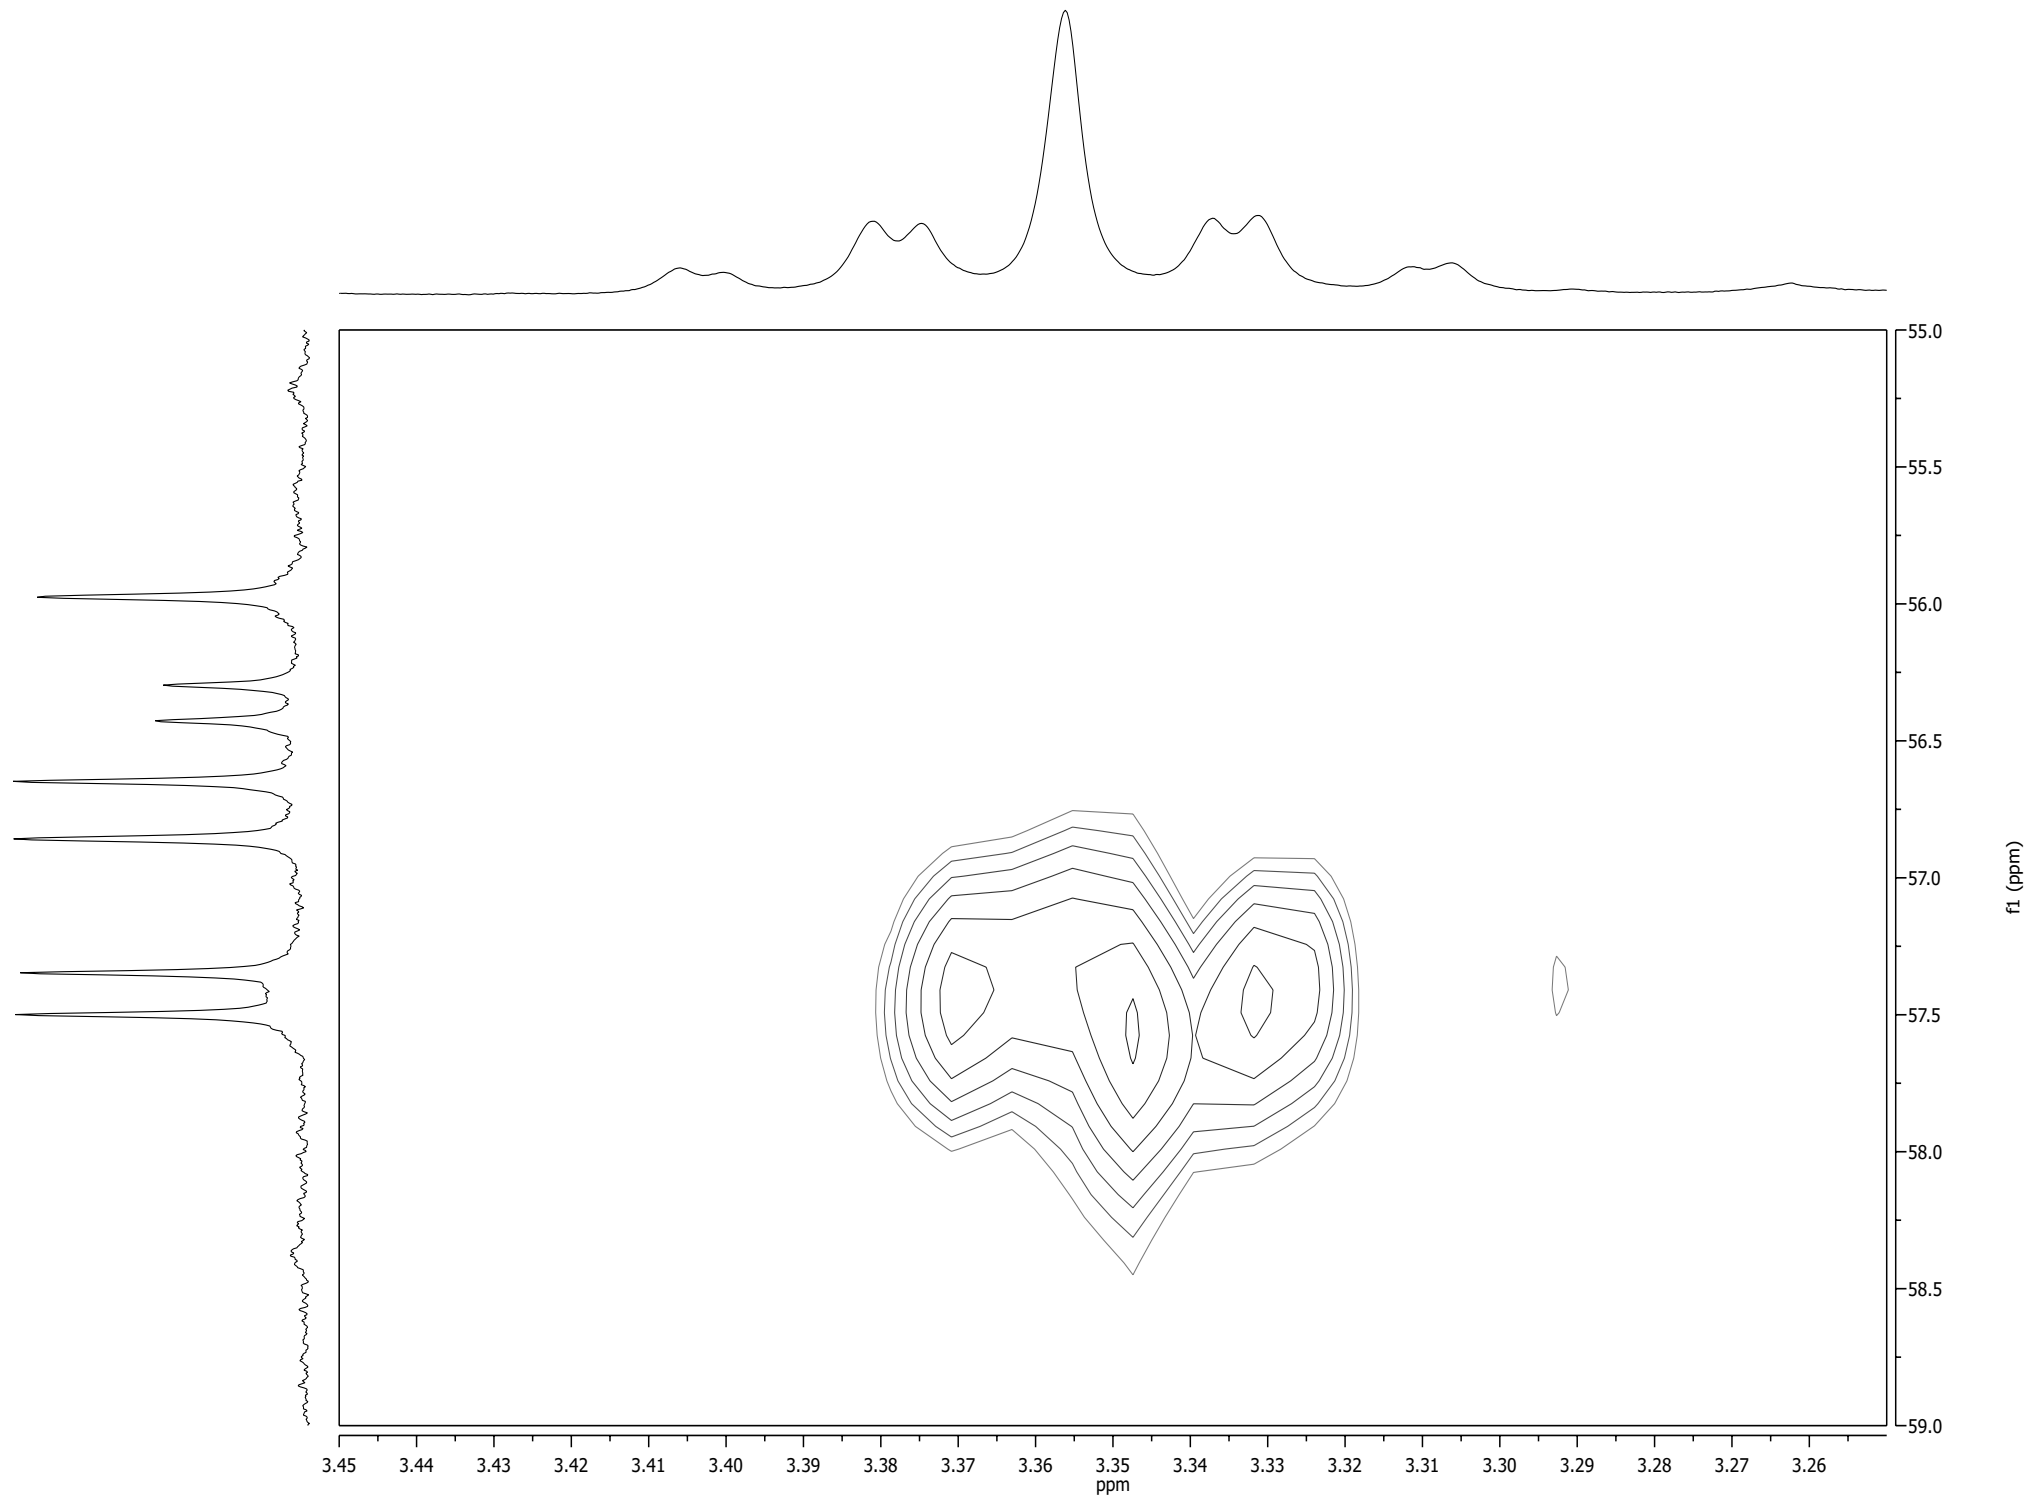

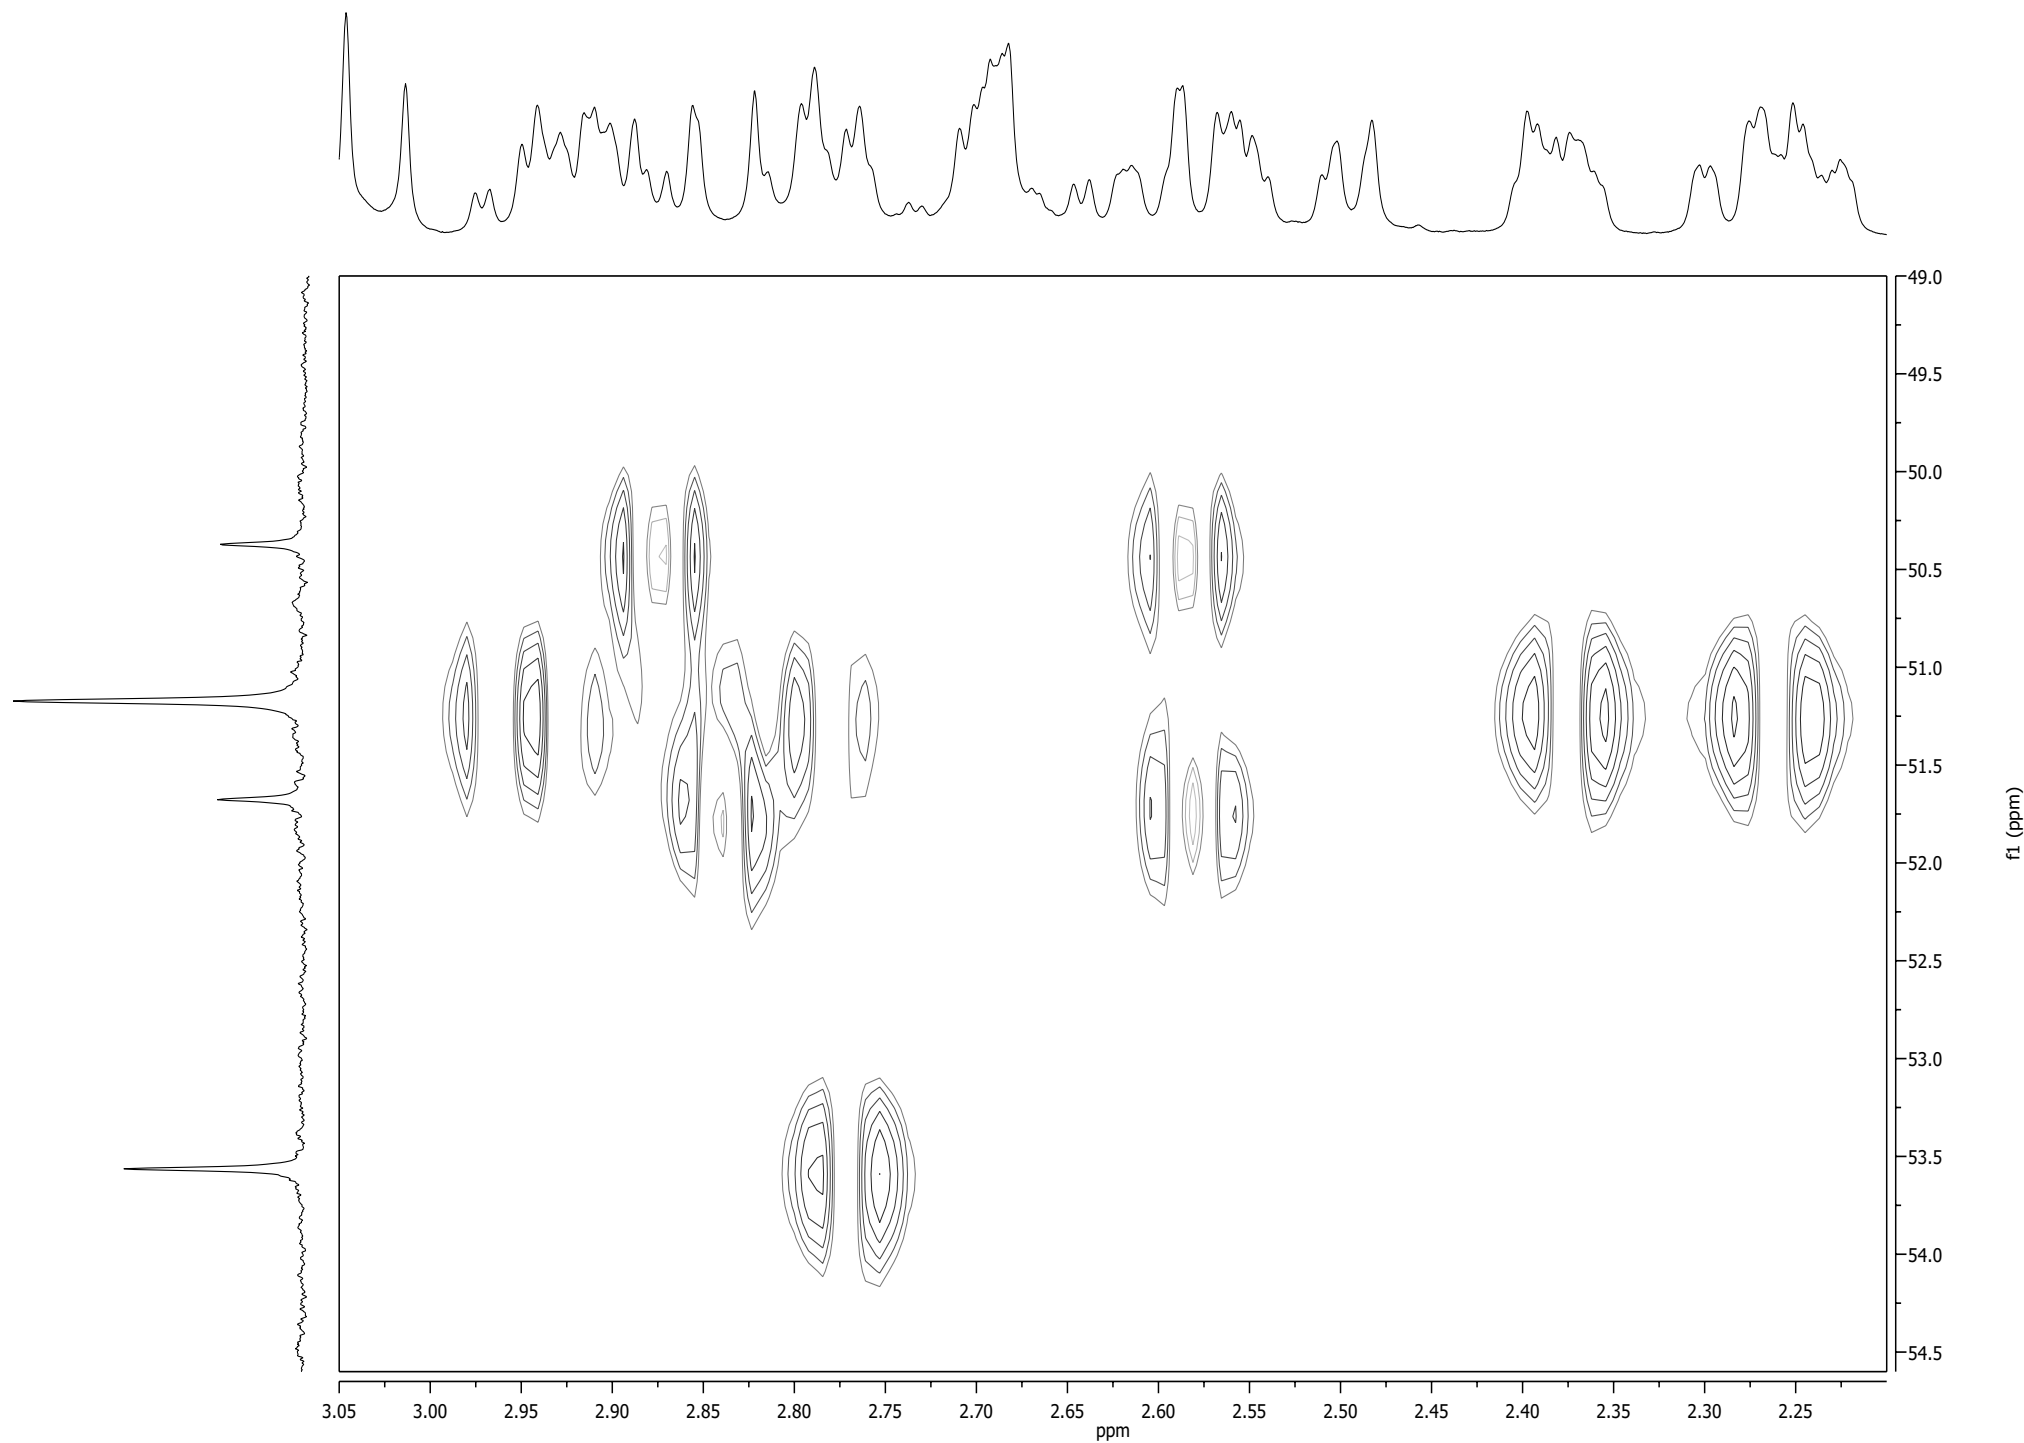

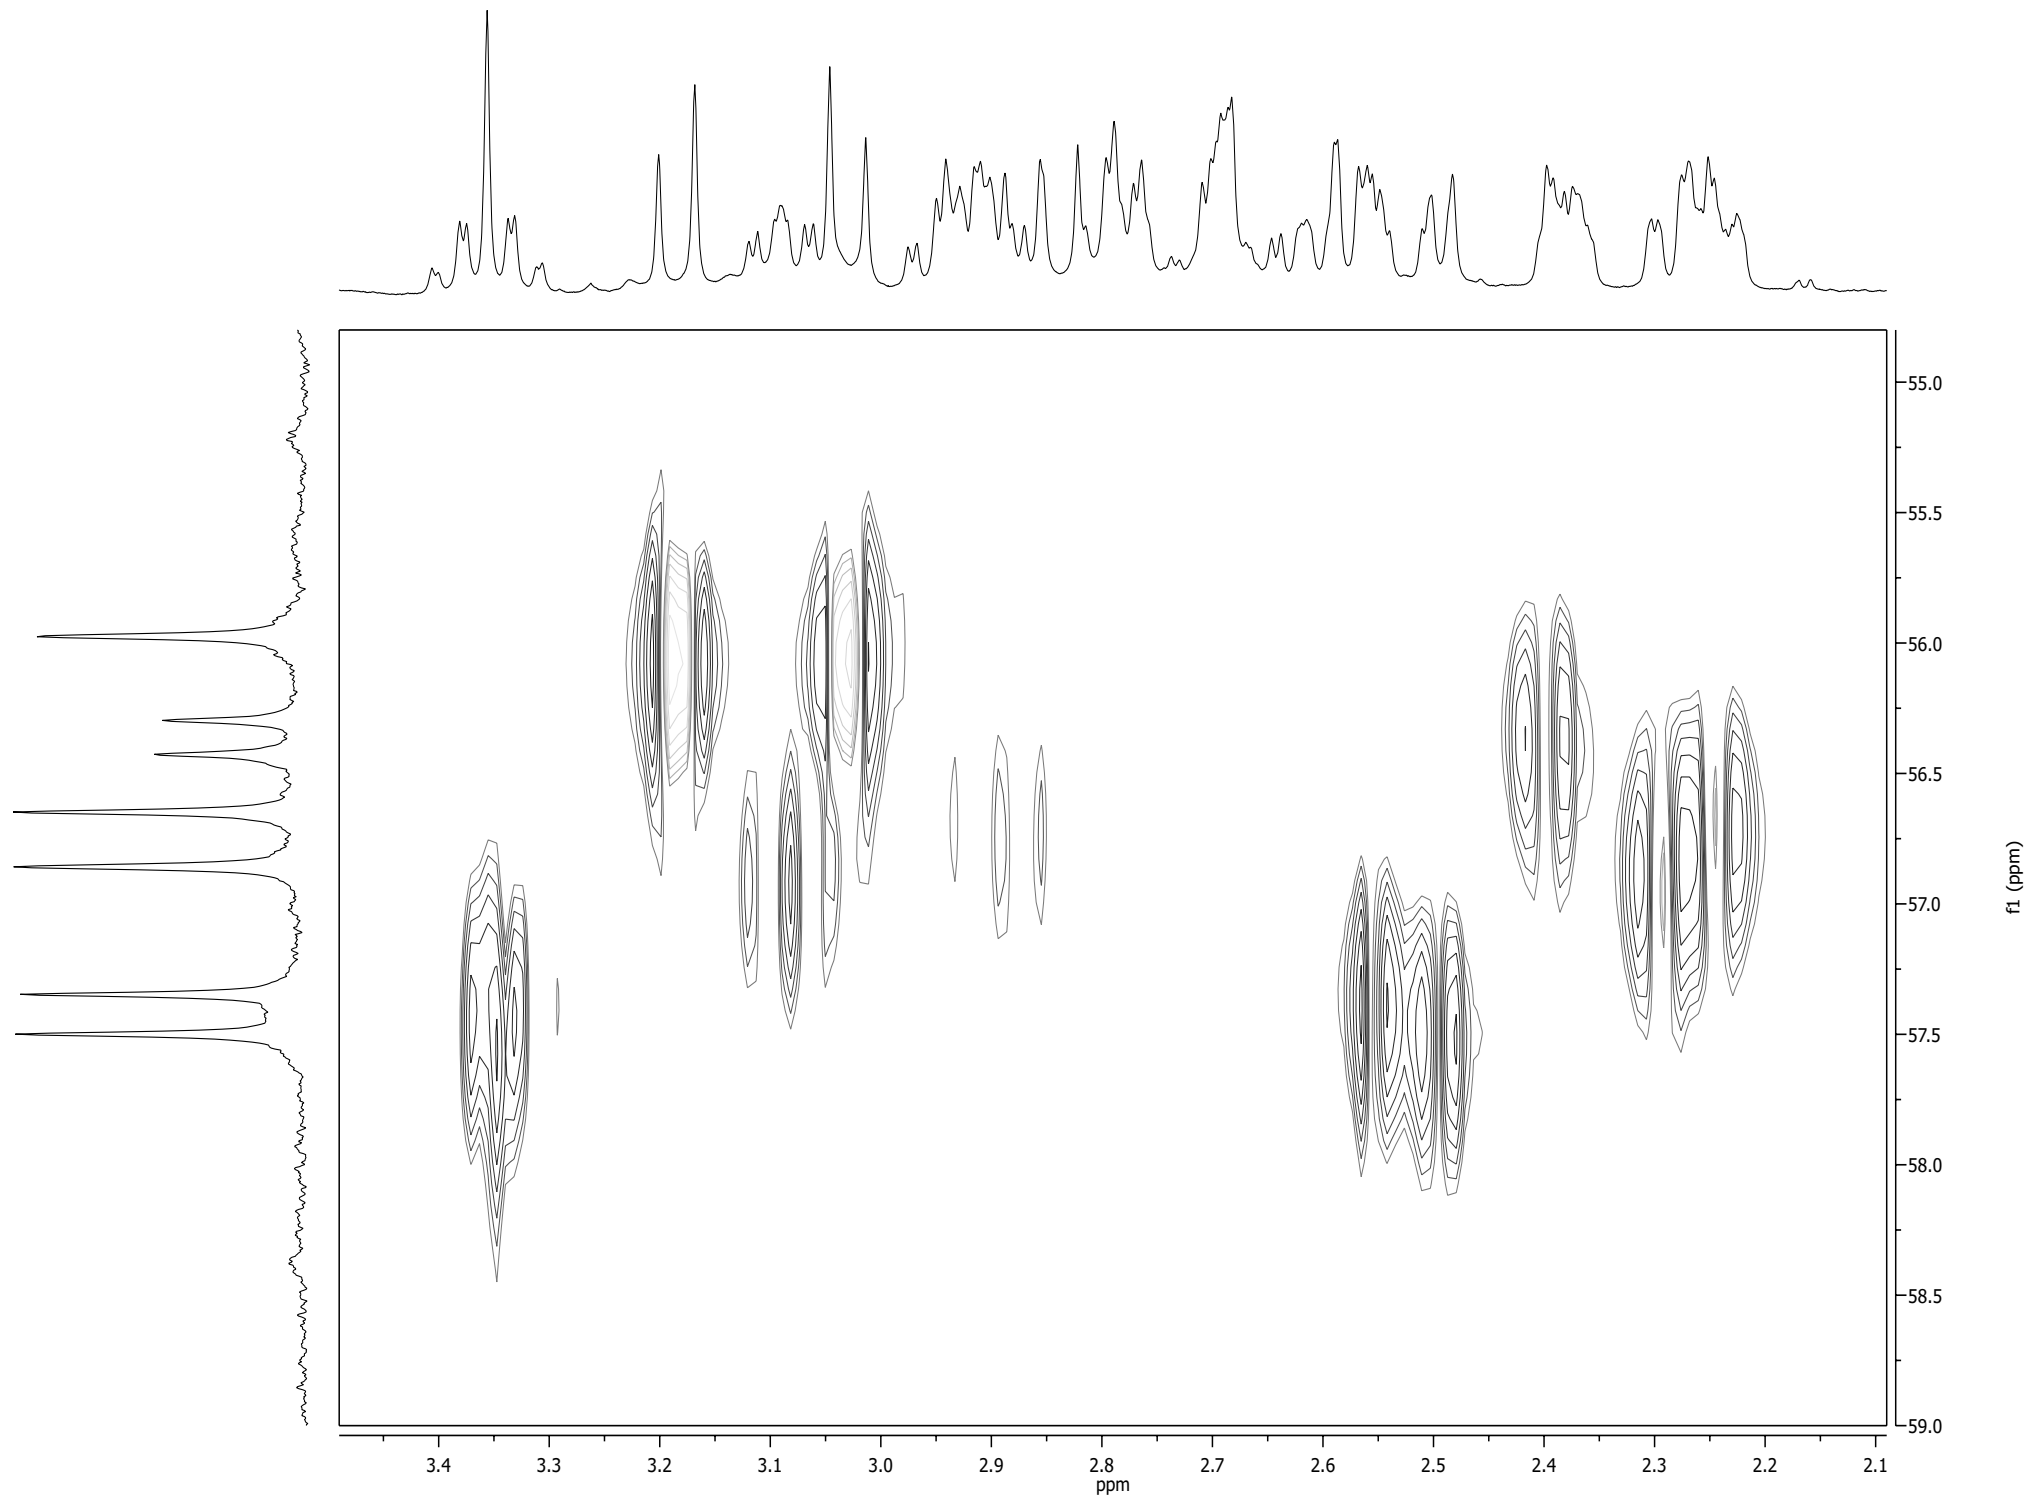

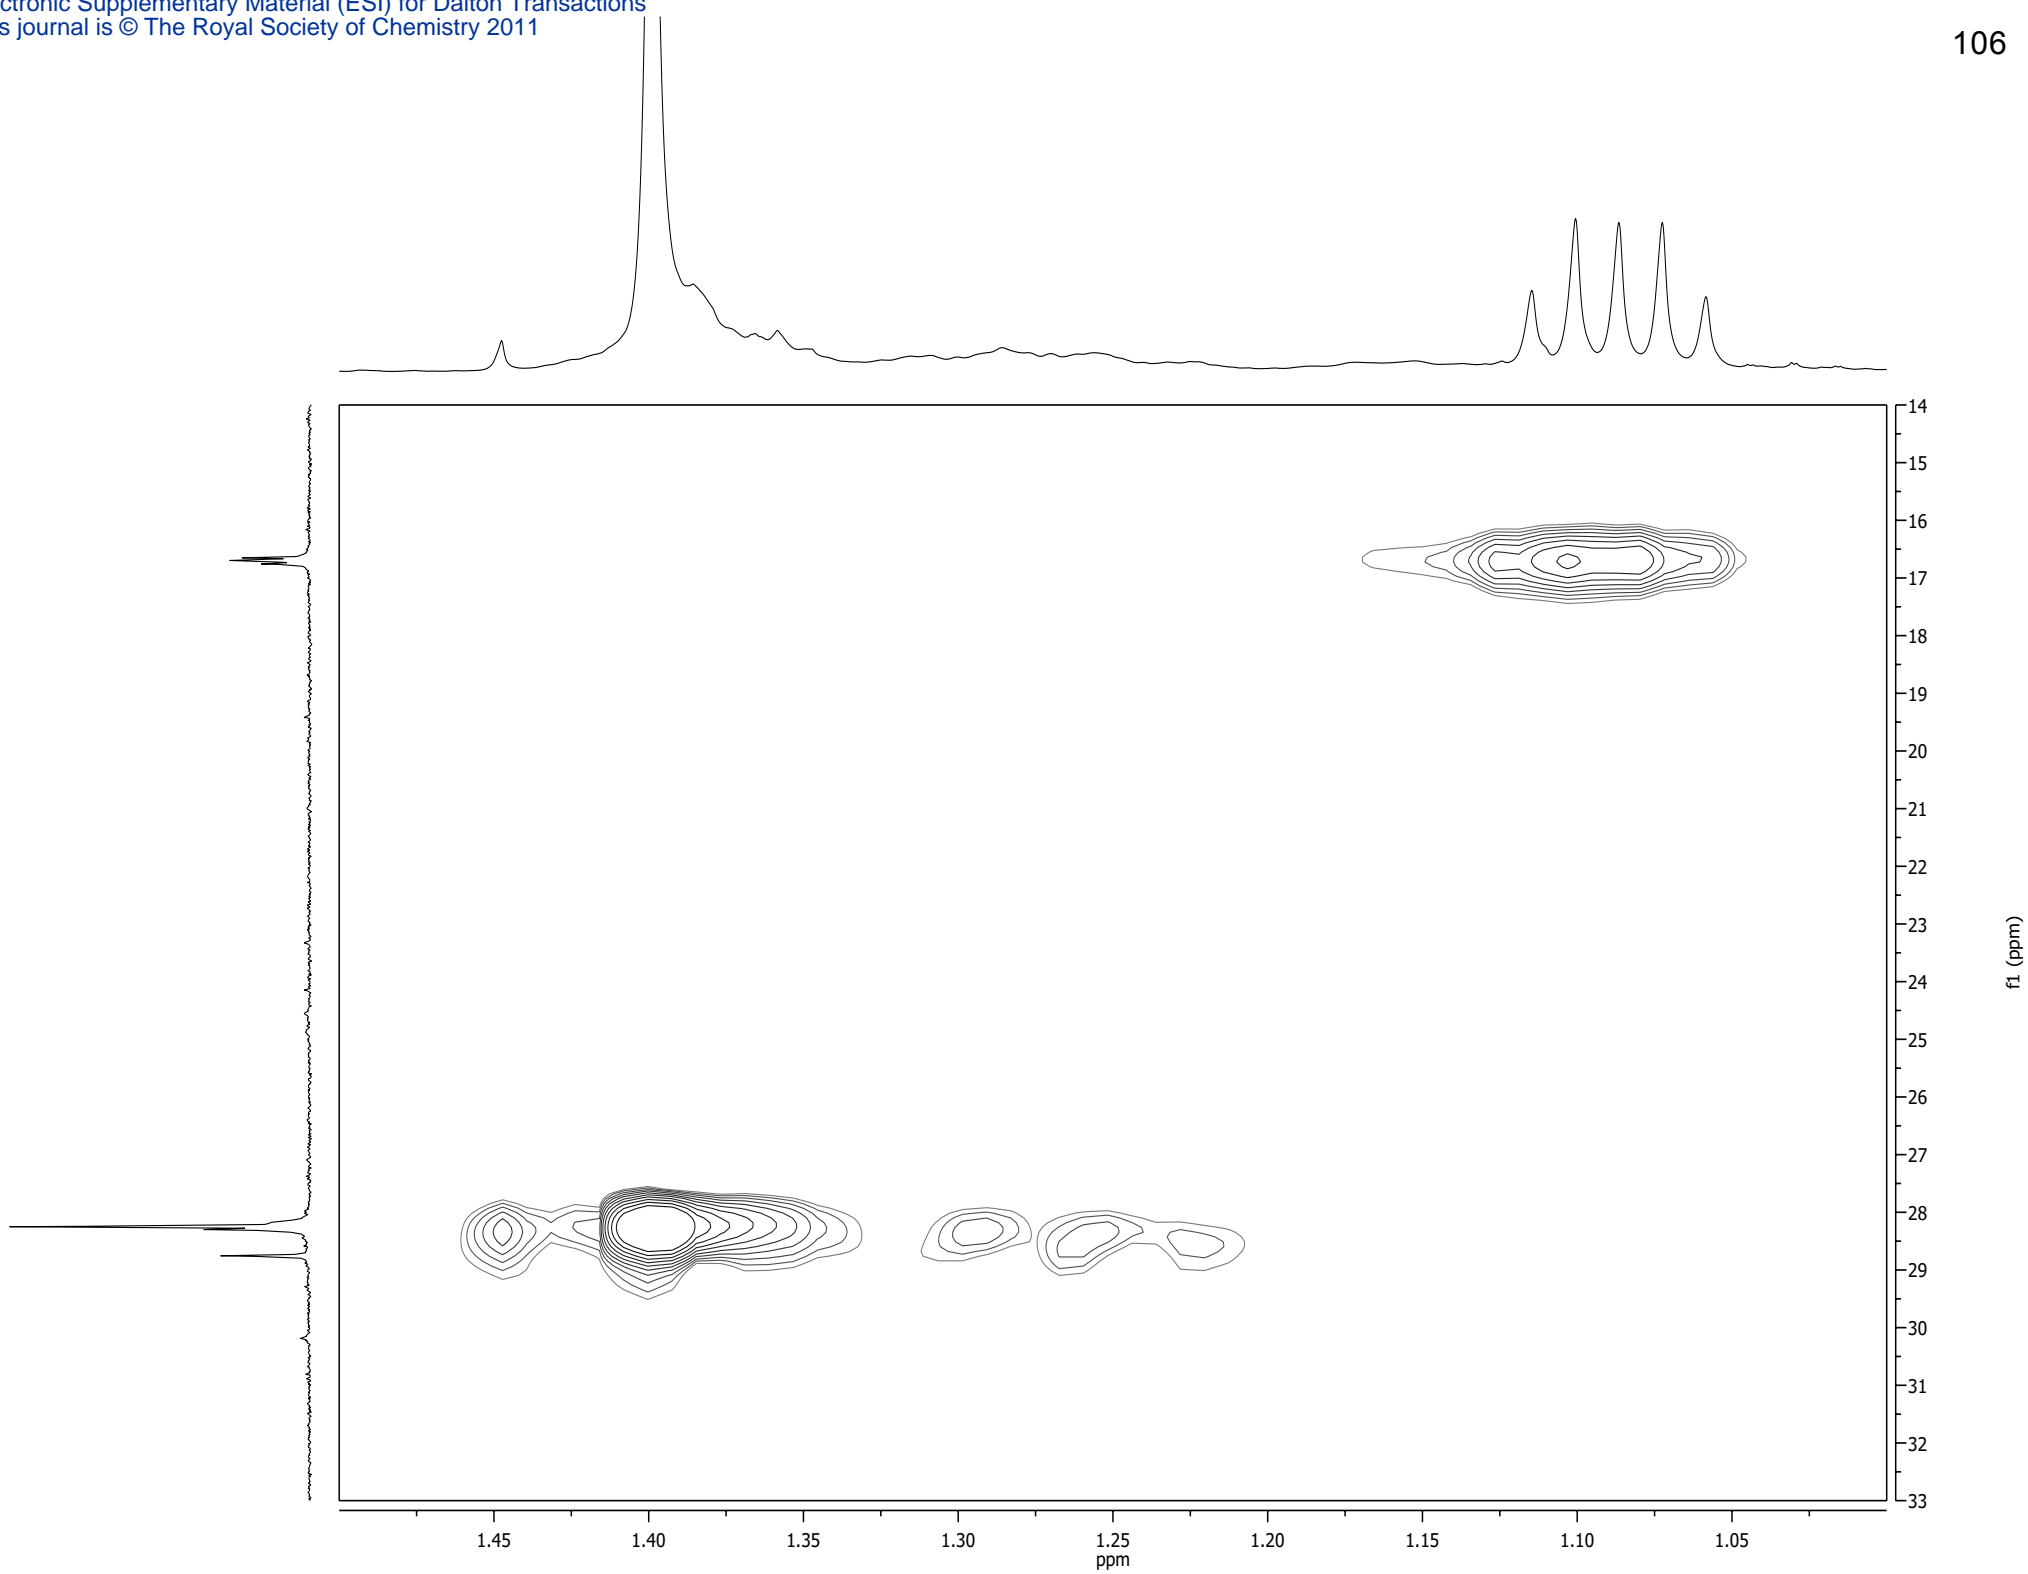

| Parameter                | Value                      |
|--------------------------|----------------------------|
| 1 Title                  | RF-CB-TE1A1P_protected-31P |
| 2 Solvent                | C6D6                       |
| 3 Temperature            | 25.0                       |
| 4 Number of Scans        | 32                         |
| 5 Spectrometer Frequency | 202.31                     |
| 6 Spectral Width         | 50600.9                    |
| 7 Lowest Frequency       | -30527.2                   |
| 8 Nucleus                | 31P                        |
| 9 Acquired Size          | 80961                      |
| 10 Spectral Size         | 262144                     |

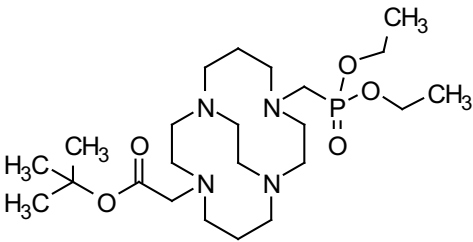

RF-CB-TE1A1P\_protected\_PhMe extracts  
<sup>31</sup>P NMR, 202.31 MHz, C<sub>6</sub>D<sub>6</sub>, external reference with  
85% phosphoric acid set to δ 0.00

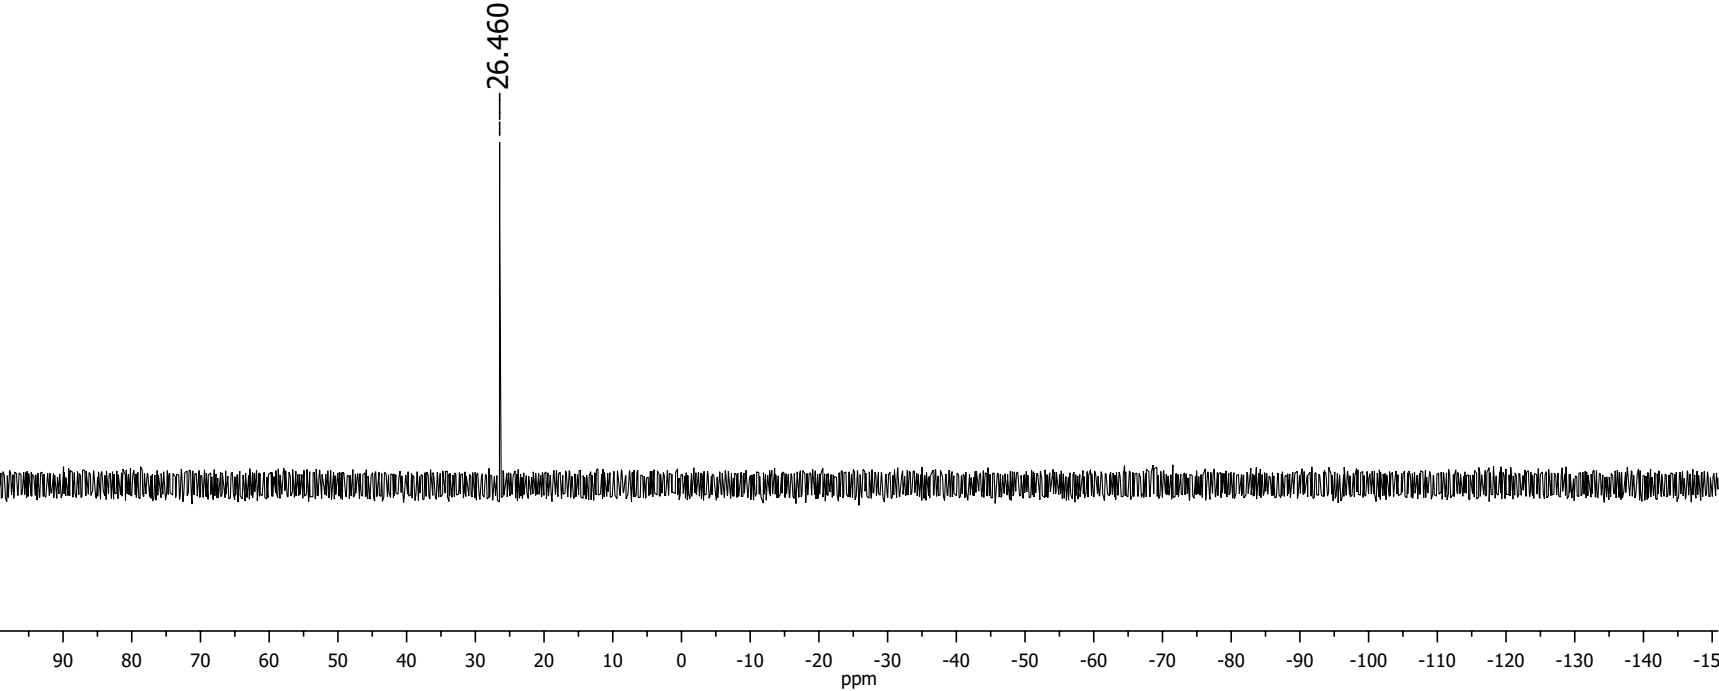

Supplement: c1dt11743b.pdf [file c1dt11743b.pdf]
